# Supplementary material
Source: publisher site journal article supplement (https://www.dovepress.com/article/133127)
Supplement: Supplementary file 1 [file get_supplementary_file.php]

## Supplementary materials

**Supplementary Table 1 Human MCL-1 Structures in the PDB**

| <b>PDB ID</b> | <b>Experimental Method</b> | <b>Ligand</b> |
|---------------|----------------------------|---------------|
| 5FC4          | X-RAY                      | Yes           |
| 5FDO          | X-RAY                      | Yes           |
| 5FDR          | X-RAY                      | Yes           |
| 4WMR          | X-RAY                      | Yes           |
| 4WMS          | X-RAY                      | Yes           |
| 4WMT          | X-RAY                      | Yes           |
| 4WMU          | X-RAY                      | Yes           |
| 4WMV          | X-RAY                      | Yes           |
| 4WMW          | X-RAY                      | Yes           |
| 4WMX          | X-RAY                      | Yes           |
| 4ZBF          | X-RAY                      | Yes           |
| 4ZBI          | X-RAY                      | Yes           |
| 4WGI          | X-RAY                      | Yes           |
| 2MHS          | NMR                        | No            |
| 4BPI          | X-RAY                      | Peptide       |
| 4BPJ          | X-RAY                      | Peptide       |
| 4OQ5          | X-RAY                      | Yes           |
| 4OQ6          | X-RAY                      | Yes           |
| 3WIX          | X-RAY                      | Yes           |
| 3WIY          | X-RAY                      | Yes           |
| 4HW2          | X-RAY                      | Yes           |
| 4HW3          | X-RAY                      | Yes           |
| 4HW4          | X-RAY                      | Peptide       |
| 3PK1          | X-RAY                      | Peptide       |
| 3MK8          | X-RAY                      | Peptide       |
| 3KZ0          | X-RAY                      | Peptide       |
| 3KJ0          | X-RAY                      | Peptide       |
| 3KJ1          | X-RAY                      | Peptide       |
| 3KJ2          | X-RAY                      | Peptide       |
| 2KBW          | NMR                        | Peptide       |
| 3IO9          | X-RAY                      | Peptide       |
| 3D7V          | X-RAY                      | Peptide       |
| 2PQK          | X-RAY                      | Peptide       |
| 2NL9          | X-RAY                      | Peptide       |

**Figure S1**

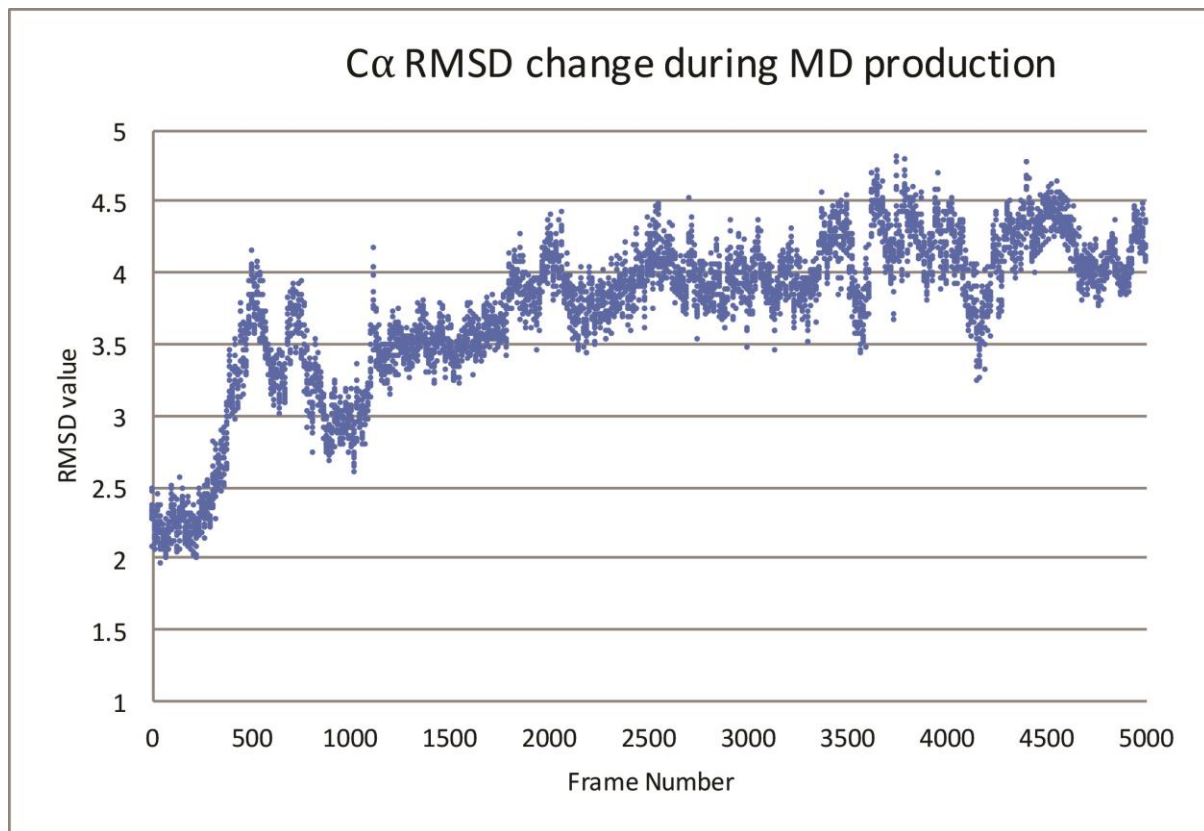

**Figure S2**

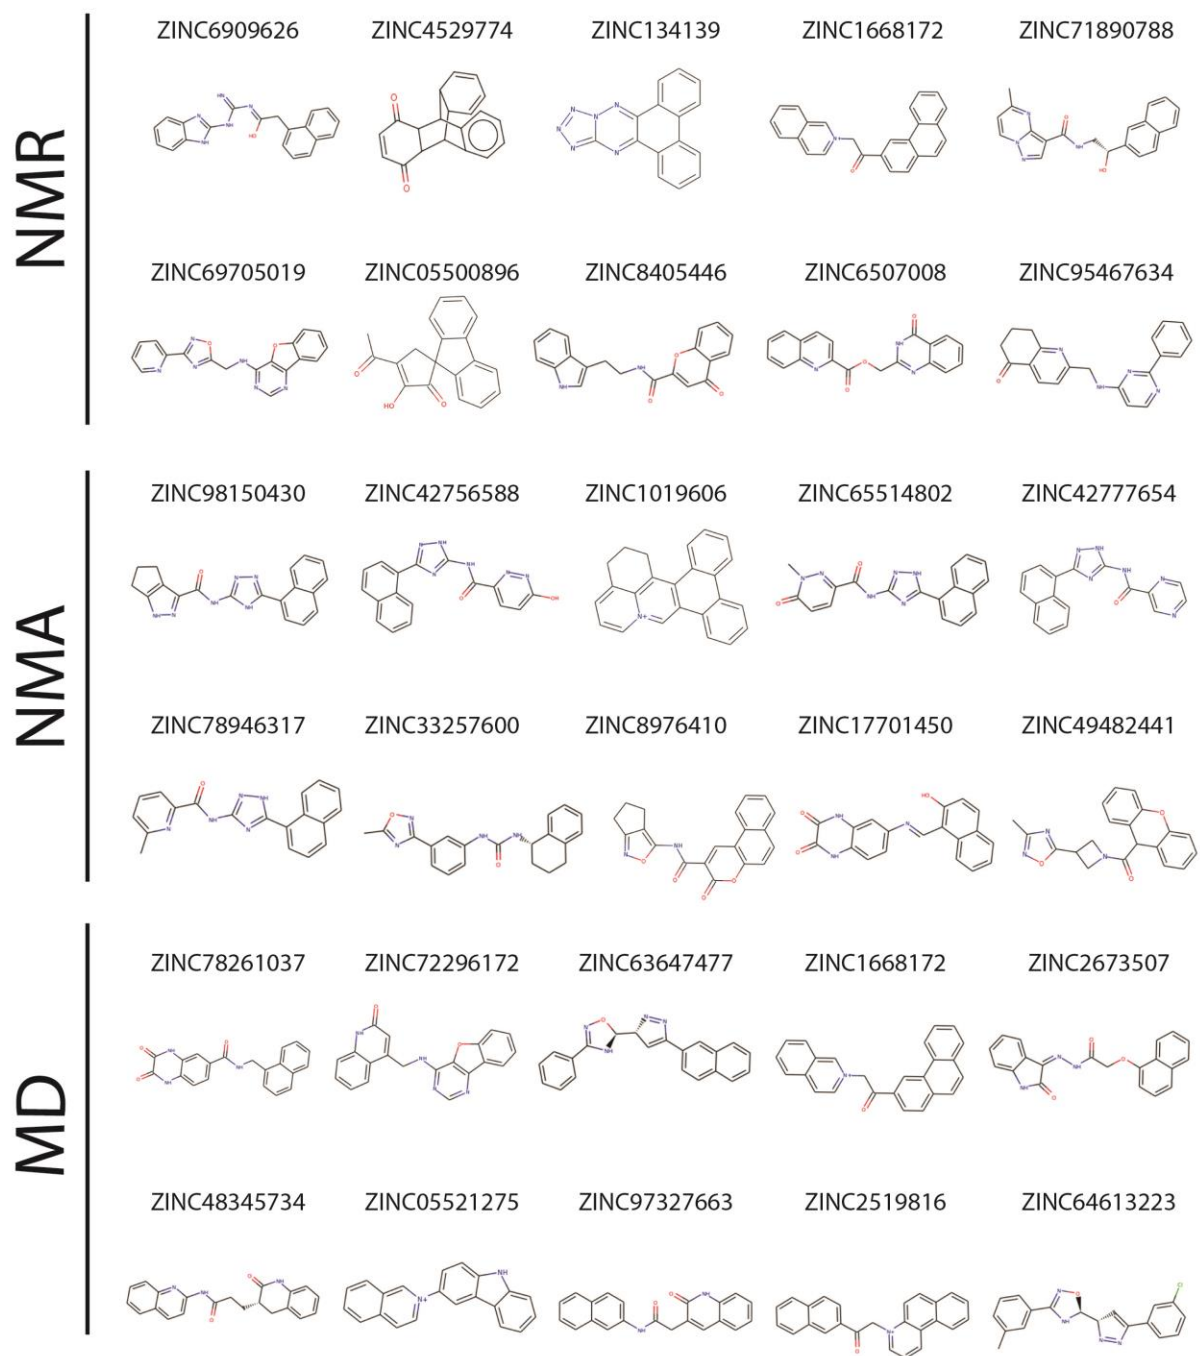

Table S2

| Table S2                  | NMR conformations |         |         |         |         |         |         |         |         |         |         |         |         |         |         | MD conformations |         |         |         |         |            |            |            |            |          | NMA conformations |           |            |           |            |                    |      |  |  |  |  |
|---------------------------|-------------------|---------|---------|---------|---------|---------|---------|---------|---------|---------|---------|---------|---------|---------|---------|------------------|---------|---------|---------|---------|------------|------------|------------|------------|----------|-------------------|-----------|------------|-----------|------------|--------------------|------|--|--|--|--|
| Binding Energy (Kcal/mol) |                   |         |         |         |         |         |         |         |         |         |         |         |         |         |         |                  |         |         |         |         |            |            |            |            |          |                   |           |            |           |            |                    |      |  |  |  |  |
| Drug ID                   | conf_01           | conf_02 | conf_03 | conf_04 | conf_05 | conf_06 | conf_07 | conf_08 | conf_09 | conf_10 | conf_11 | conf_12 | conf_13 | conf_14 | conf_15 | conf_16          | conf_17 | conf_18 | conf_19 | conf_20 | conf_01500 | conf_02500 | conf_03750 | conf_04250 | conf_091 | conf_0911         | conf_0101 | conf_01011 | conf_0111 | conf_01111 | Standard deviation |      |  |  |  |  |
| 1                         | -5.6              | -4.7    | -4.8    | -5.2    | -5.1    | -5.6    | -4.7    | -4.6    | -5.9    | -5.2    | -5.1    | -4.7    | -4.5    | -5.2    | -5      | -4.9             | -4.8    | -5.1    | -5.5    | -4.9    | -5.4       | -5.7       | -5.5       | -5.2       | -5.8     | -5.3              | -5.7      | -5.4       | -5.4      | -5.4       | -5.7               | 0.39 |  |  |  |  |
| 2                         | 52                | 37.2    | 61.1    | 76.1    | 78.5    | 66.5    | 63.7    | 45.8    | 51.7    | 79.4    | 62.1    | 80.9    | 67.9    | 60.5    | 62      | 53.4             | 71.3    | 63.6    | 57.2    | 71.4    | 50.5       | 35.5       | 3.4        | 10.8       | -1.3     | 2.6               | 2.4       | -1.1       | 1.4       | 1.3        | 28.64              |      |  |  |  |  |
| 3                         | -3.5              | -3.2    | -3.1    | -3.5    | -3.1    | -3.6    | -3.3    | -3.1    | -3.5    | -3.4    | -3.5    | -3.1    | -3.3    | -3.1    | -3.3    | -3.4             | -3.3    | -3.6    | -3.3    | -3.2    | -3.7       | -3.8       | -3         | -3.6       | -3.3     | -3.3              | -3.3      | -3.3       | -3.3      | -3.3       | -3.3               | 0.20 |  |  |  |  |
| 4                         | -4.5              | -4.4    | -5      | -4.5    | -4.4    | -4.5    | -4.3    | -4.7    | -4.3    | -4.6    | -4.5    | -5      | -4.6    | -5      | -4.6    | -4.3             | -4.5    | -4.5    | -4.4    | -4.3    | -3.8       | -4.4       | -4.5       | -4.7       | -4.7     | -4.4              | -4.5      | -4.4       | -4.4      | -4.6       | 0.24               |      |  |  |  |  |
| 5                         | -6.4              | -5.1    | -3.7    | -4.3    | -5.9    | -5.6    | -5.6    | -4.6    | -6.5    | -4.1    | -6      | -1.4    | -6.1    | -4.7    | -5.4    | -2.4             | -5      | -6.1    | -6.8    | -6.2    | 0.5        | -5.7       | -6.6       | -6         | -7       | -6.4              | -6.4      | -6.6       | -6.2      | -6.6       | 1.69               |      |  |  |  |  |
| 6                         | -4.8              | -4.1    | -2.3    | -3.1    | -4.9    | -4.9    | -4.3    | -3.7    | -5.4    | -0.9    | -5.7    | -1.4    | -4.1    | -4      | -4.7    | -4.5             | -4.3    | -5.6    | -5.9    | -5.6    | -4.6       | -5.2       | -6.8       | -4.1       | -7.1     | -6.1              | -6.8      | -6.7       | -6.2      | -6.8       | 2.83               |      |  |  |  |  |
| 7                         | -2.6              | -2.7    | -2.5    | -2.5    | -2.5    | -2.3    | -2.6    | -2.4    | -2.6    | -2.6    | -2.6    | -2.5    | -2.6    | -2.4    | -2.4    | -2.5             | -2.5    | -2.3    | -2.4    | -2.4    | -2.8       | -2.6       | -2.6       | -2.9       | -2.6     | -2.5              | -2.7      | -2.5       | -2.6      | -2.6       | 0.13               |      |  |  |  |  |
| 8                         | -5.4              | -5.1    | -5.7    | -5.5    | -5.3    | -5.1    | -4.9    | -5.4    | -5.8    | -5.3    | -5.3    | -5.3    | -4.8    | -5.7    | -5.7    | -5.1             | -5.5    | -4.7    | -5.2    | -5      | -4.9       | -5.9       | -5.3       | -5.6       | -5.6     | -5.3              | -5.5      | -5.3       | -5.3      | -5.4       | 0.30               |      |  |  |  |  |
| 9                         | -4.9              | -4      | -4.5    | -4.3    | -4.3    | -3.9    | -4.3    | -4.2    | -5.3    | -4.1    | -4.2    | -4.5    | -4.5    | -4.6    | -4.3    | -4.1             | -4.4    | -4      | -4.2    | -4.1    | -3.6       | -4.6       | -4.2       | -5         | -4.9     | -4.7              | -4.8      | -4.8       | -4.8      | -5         | 0.39               |      |  |  |  |  |
| 10                        | -5.3              | -3.8    | -4.5    | -4.6    | -5.5    | -4.6    | -3.8    | -4.1    | -6.7    | -3.8    | -5      | -2.4    | -4.6    | -5      | -4.6    | -2.3             | -3.8    | -5      | -6.1    | -5.2    | 2.2        | -5.3       | -6.7       | -5.2       | -6       | -5.9              | -6.3      | -6.7       | -6        | -6.1       | 1.74               |      |  |  |  |  |
| 11                        | -6                | -5.6    | -5.4    | -5      | -5.7    | -5.6    | -5.5    | -5.3    | -5.9    | -5.6    | -5.6    | -4.9    | -5.8    | -5.8    | -5.4    | -4.9             | -5      | -6.2    | -6.2    | -5.8    | -2.8       | -6         | -6.6       | -5.4       | -5.9     | -6                | -6.1      | -6.4       | -6        | -6         | 0.68               |      |  |  |  |  |
| 12                        | -5.4              | -4.7    | -3.5    | -3.7    | -5.2    | -4.9    | -4.7    | -4.2    | -4.7    | -3.8    | -4.9    | -4.1    | -4.1    | -4.6    | -4.9    | -5.1             | -3.9    | -5.1    | -5.1    | -5.3    | -3.1       | -5.6       | -4.9       | -5.2       | -5.3     | -5.1              | -5.2      | -5.2       | -5.4      | -5.4       | 0.65               |      |  |  |  |  |
| 13                        | -5.3              | -4.5    | -4.5    | -5.2    | -4.9    | -4.5    | -4.8    | -4.4    | -5.9    | -4.4    | -4.9    | -4.9    | -4.7    | -5      | -4.5    | -4.4             | -4.3    | -5.1    | -5.2    | -4.8    | -5.1       | -5.3       | -5.3       | -5.1       | -5.7     | -5                | -5.5      | -5.3       | -5.2      | -5.5       | 0.42               |      |  |  |  |  |
| 14                        | -5.3              | -5      | -4.9    | -5.1    | -4.8    | -4.6    | -4.7    | -5.3    | -5.1    | -5.1    | -4.7    | -4.5    | -4.8    | -5.2    | -5.2    | -5               | -4.7    | -4.8    | -5      | -4.6    | -2.4       | -6.1       | -5.5       | -5.6       | -5.4     | -5.1              | -5.1      | -5.3       | -5.2      | -5.4       | 0.60               |      |  |  |  |  |
| 15                        | -5.4              | -5      | -5      | -4.8    | -5.4    | -5.1    | -4.4    | -5.2    | -6      | -5.3    | -5.1    | -4.8    | -5.3    | -5.4    | -5.3    | -5               | -5.1    | -4.6    | -5.4    | -5.4    | -4.6       | -6.3       | -5.6       | -5.3       | -5.3     | -5.3              | -5.7      | -5.5       | -5.6      | -5.3       | 0.40               |      |  |  |  |  |
| 16                        | -6.2              | -5.8    | -5.7    | -5.6    | -5.8    | -5.5    | -5.4    | -6.3    | -6.2    | -5.4    | -5.1    | -6      | -5.5    | -6.4    | -5.8    | -6.2             | -5.4    | -5.4    | -5.9    | -5.7    | 0.8        | -6.1       | -5.9       | -6.4       | -6.1     | -6.2              | -5.8      | -6.2       | -6.1      | -6.1       | 1.27               |      |  |  |  |  |
| 17                        | -5.9              | -5.1    | -5.3    | -5.3    | -5.6    | -5.4    | -4.9    | -5.2    | -6.1    | -5.2    | -5.4    | -5.2    | -5.5    | -5.4    | -5.2    | -4.8             | -4.7    | -6      | -5.9    | -5.5    | -2.8       | -5.7       | -6.3       | -5.4       | -5.8     | -6.2              | -6.1      | -6.3       | -5.9      | -5.8       | 0.67               |      |  |  |  |  |
| 18                        | -6.3              | -5      | -5.2    | -5.1    | -5.8    | -5.8    | -5.4    | -4.9    | -6.2    | -4.9    | -5.8    | -5.1    | -5.2    | -5.6    | -5.5    | -4.5             | -4.7    | -6.4    | -6.3    | -6.1    | -2.4       | -5.9       | -7.4       | -5.8       | -6.3     | -6.4              | -6.7      | -6.7       | -6.8      | -6.4       | 0.94               |      |  |  |  |  |
| 19                        | -6.2              | -4.8    | -3.4    | -2.9    | -5.8    | -5.4    | -5.3    | -3.8    | -6.4    | -3      | -5.6    | -0.6    | -5.8    | -4.5    | -5.4    | -1.6             | -5.1    | -5.9    | -5.8    | -6.1    | -3.6       | -5.8       | -6.7       | -5.9       | -6.4     | -6.2              | -6.1      | -6.2       | -6.2      | -6.2       | 1.52               |      |  |  |  |  |
| 20                        | -6.2              | -5.8    | -3.3    | -2      | -6.1    | -5.7    | -6.1    | -3.4    | -7.6    | -4.1    | -6.8    | -3.4    | -7      | -3.6    | -5.9    | -3.8             | -5.8    | -5.2    | -6.6    | -5.4    | -2.7       | -6         | -7.3       | -6.4       | -6.8     | -6.4              | -6.7      | -7         | -6.3      | -6.7       | 1.51               |      |  |  |  |  |
| 21                        | -6.1              | -4.9    | -3.1    | -3.5    | -5.7    | -5.3    | -5.2    | -5.4    | -6.7    | -4.2    | -5.7    | -3.7    | -5.6    | -5.3    | -5.4    | -2.6             | -5      | -6.2    | -6.4    | -5.9    | -4.5       | -4.8       | -6.9       | -5.6       | -5.9     | -6.3              | -6.2      | -6.2       | -6.2      | -5.9       | 1.06               |      |  |  |  |  |
| 22                        | -4.8              | -4.4    | -4.5    | -4.2    | -4.5    | -4.2    | -4      | -4.8    | -4.5    | -4.3    | -4.6    | -4.1    | -4.1    | -4.7    | -4.6    | -4.5             | -4.2    | -4.3    | -4.4    | -4.2    | -4.3       | -5.1       | -4.5       | -4.6       | -5       | -4.4              | -5        | -4.4       | -4.6      | -4.9       | 0.29               |      |  |  |  |  |
| 23                        | -5.2              | -4.5    | -3.5    | -4.2    | -6.3    | -5      | -4.6    | -5      | -7.5    | -4.6    | -5.4    | -2.8    | -6.2    | -6.2    | -5.2    | -3.8             | -5.1    | -5.7    | -5.6    | -6      | -2.1       | -6.2       | -6.2       | -6         | -5.9     | -5.8              | -6        | -6.5       | -5.7      | -6.5       | 1.17               |      |  |  |  |  |
| 24                        | -5.9              | -3.9    | -1.7    | -2.3    | -5.5    | -5.3    | -4.7    | -4.7    | -6.4    | -3.9    | -5.4    | -1.7    | -5.2    | -1.1    | -5.2    | -1               | -3.7    | -5      | -5.7    | -5.6    | -4.5       | -5.2       | -5.9       | -4.5       | -6.2     | -6.1              | -6.1      | -6         | -6        | -6         | 1.98               |      |  |  |  |  |
| 25                        | 8.6               | 27.2    | 32.1    | 46.7    | 34.8    | 29.2    | 32.5    | 21.1    | 10.8    | 49.2    | 31      | 63.7    | 39.3    | 41.6    | 20.6    | 35.6             | 29      | 8.9     | 16.7    | 17.4    | 41         | 32.4       | 8.1        | 4.6        | -4.5     | -4.4              | -4.6      | -3.3       | -4.4      | -3         | 19.30              |      |  |  |  |  |
| 26                        | -5.3              | -4.8    | -4.4    | -4.7    | -5.3    | -5.2    | -4.5    | -4.8    | -5.9    | -4.7    | -5.1    | -4.4    | -4.9    | -4.8    | -4.8    | -4.4             | -4.3    | -4.9    | -5.8    | -5      | -4.6       | -5         | -5.4       | -5.8       | -5.6     | -5.9              | -5.7      | -5.4       | -5.8      | -5.6       | 0.53               |      |  |  |  |  |
| 27                        | -4.7              | -4.2    | -4.2    | -5.2    | -4.5    | -5.3    | -4.6    | -4.3    | -4.7    | -4.8    | -4.4    | -4.4    | -4.1    | -4.8    | -4.3    | -4.6             | -4.1    | -4.4    | -4.9    | -5.1    | -4         | -5.2       | -5.3       | -4.9       | -4.9     | -4.7              | -4.5      | -4.8       | -4.5      | -4.6       | 0.36               |      |  |  |  |  |
| 28                        | -5.1              | -4.3    | -4.3    | -4.9    | -4.6    | -4.5    | -4.6    | -4.4    | -5.6    | -4.3    | -4.8    | -4.3    | -4.7    | -4.9    | -4.4    | -4.3             | -4.2    | -4.7    | -5.1    | -4.5    | -4.4       | -5.1       | -5         | -5         | -5.3     | -4.8              | -5.3      | -5.1       | -4.9      | -5.2       | 0.37               |      |  |  |  |  |
| 29                        | -5.1              | -4.3    | -4.6    | -5.2    | -5      | -4.9    | -4.9    | -4.6    | -5.3    | -4.9    | -5.1    | -4.7    | -4.9    | -4.3    | -4.7    | -4               | -4.1    | -4.8    | -4.6    | -4.4    | -4.7       | -4.9       | -4.6       | -4.8       | -4.8     | -4.5              | -4.7      | -4.7       | -4.6      | -4.7       | 0.30               |      |  |  |  |  |
| 30                        | -5.1              | -5.3    | -4.7    | -4.5    | -5.1    | -4.8    | -4.2    | -5.3    | -4.9    | -5      | -4.6    | -4.4    | -4.5    | -5.6    | -5      | -5.1             | -4.8    | -4.7    | -5      | -4.8    | -3.4       | -5.8       | -5.4       | -5.4       | -5.1     | -5.1              | -5.4      | -5.3       | -5.2      | -5.2       | 0.47               |      |  |  |  |  |
| 31                        | -5.1              | -4.6    | -4.6    | -3.8    | -4.7    | -4.4    | -4.3    | -4.7    | -5.2    | -4      | -4.7    | -3.5    | -4.1    | -5.4    | -4.8    | -4               | -4.3    | -4.7    | -4.7    | -4.1    | -3.5       | -5.2       | -6.2       | -5.2       | -5.3     | -5.5              | -5.1      | -5.2       | -5.2      | -5         | 0.62               |      |  |  |  |  |
| 32                        | -3.8              | -3.5    | -4.2    | -4.2    | -3.7    | -3.9    | -3.4    | -3.7    | -4.3    | -4      | -3.6    | -4.2    | -4.1    | -4      | -3.8    | -3.5             | -4      | -3.6    | -3.7    | -3.5    | -3.8       | -4.3       | -3.7       | -4         | -3.9     | -3.6              | -3.8      | -3.9       | -3.6      | -3.8       | 0.25               |      |  |  |  |  |
| 33                        | -5.3              | -4.7    | -4.3    | -3      | -6.2    | -5.6    | -4.8    | -4      | -6.4    | -2.7    | -5.8    | -3.2    | -5.3    | -4.9    | -5.4    | -3.8             | -5.2    | -5.3    | -5.9    | -5.3    | -1.2       | -4.8       | -6.1       | -5.7       | -6.5     | -6.6              | -6.3      | -6.6       | -6.3      | -6.6       | 1.32               |      |  |  |  |  |
| 34                        | -5.1              | -5      | -4.6    | -4.7    | -4.8    | -4.7    | -4.2    | -5.2    | -5.1    | -4.8    | -4.8    | -4.5    | -4.4    | -5.3    | -4.8    | -4.8             | -4.8    | -4.7    | -5.3    | -4.8    | -2.9       | -5.4       | -5.2       | -5.5       | -5       | -5.2              | -4.9      | -5.2       | -5.2      | -5.1       | 0.48               |      |  |  |  |  |
| 35                        | -5.5              | -4.6    | -5.5    | -5      | -5.1    | -5      | -4.6    | -5.5    | -6.2    | -5.2    | -5.4    | -5.1    | -4.8    | -5.2    | -4.7    | -5               | -4.7    | -5.6    | -5.9    | -5.2    | -4.1       | -5.9       | -5.8       | -5.6       | -5.4     | -5.6              | -5.5      | -5.6       | -5.5      | -5.5       | 0.46               |      |  |  |  |  |
| 36                        | -0.1              | 0       | 3.2     | 18.6    | -1.7    | 1.6     | 4.5     | 6.4     | -6.8    | 18.9    | 4.6     | 18.6    | 2       | 16.1    | 4       | 5.2              | -0.9    | -3.4    | 2.2     | -0.1    | 16.3       | -3.2       | -7.8       | -5.3       | -7.3     | -6.1              | -7        | -7.5       | -7.3      | -7.6       | 8.52               |      |  |  |  |  |
| 37                        | -2.4              | -2.1    | -2.3    | -2.6    | -2.4    | -2.7    | -2.3    | -2.4    | -2.5    | -2.3    | -2.6    | -2.4    | -2.4    | -2.4    | -2.3    | -2               | -2.3    | -2.4    | -2.3    | -2.1    | -3         | -2.6       | -2.4       | -2.8       | -2.3     | -2.3              | -2.3      | -2.3       | -2.3      | -2.3       | 0.20               |      |  |  |  |  |
| 38                        | -4.9              | -4.3    | -4.6    | -4.8    | -4.6    | -4.5    | -4.1    | -4.7    | -5.5    | -4.3    | -4.6    | -4.2    | -5.2    | -5.2    | -4.4    | -4.3             | -4.4    | -4.7    | -5.3    | -4.4    | -3.5       | -4.9       | -5.5       | -4.4       | -5.1     | -5.2              | -5        | -5.6       | -5.3      | -5.7       | 0.52               |      |  |  |  |  |
| 39                        | -5.4              | -5.2    | -5.1    | -5.2    | -5.4    | -5.2    | -5.1    | -5.6    | -5      | -5.6    | -5      | -5.2    | -5.1    | -5.6    | -5.4    | -5.3             | -5.5    | -5      | -5.5    | -5.2    | -4.1       | -6         |            |            |          |                   |           |            |           |            |                    |      |  |  |  |  |

|     |      |      |      |      |      |      |      |      |      |      |      |      |      |      |      |      |      |      |      |      |      |      |      |      |      |      |      |      |      |      |      |      |
|-----|------|------|------|------|------|------|------|------|------|------|------|------|------|------|------|------|------|------|------|------|------|------|------|------|------|------|------|------|------|------|------|------|
| 87  | -4.9 | -4.6 | -4.2 | -4.2 | -4.6 | -4.3 | -3.9 | -4.9 | -5.3 | -4.7 | -4.7 | -4   | -4.5 | -5.2 | -4.7 | -5   | -4.4 | -4.2 | -5   | -4.4 | -3.4 | -5.3 | -5.4 | -4.9 | -5.2 | -5.1 | -4.9 | -5.1 | -5.1 | -5.2 | 0.48 |      |
| 88  | -3.2 | -2.8 | -2.8 | -3.1 | -2.7 | -3.1 | -2.8 | -2.7 | -3.2 | -2.8 | -3.1 | -2.9 | -3   | -3   | -2.9 | -2.7 | -2.7 | -2.8 | -2.8 | -2.7 | -3   | -3.6 | -2.6 | -3.4 | -3.1 | -3.1 | -3.1 | -3.1 | -3.2 | -3.2 | 0.23 |      |
| 89  | -5.3 | -5.1 | -5.4 | -5.1 | -5.2 | -5   | -4.9 | -4.7 | -5.9 | -5.1 | -5.2 | -4.9 | -5.4 | -5.3 | -5.5 | -4.5 | -4.8 | -5   | -5.1 | -5.4 | -5.2 | -5.2 | -5.6 | -5   | -6.4 | -5.6 | -6.1 | -5.7 | -5.8 | -6   | 0.48 |      |
| 90  | -4.8 | -4.5 | -4.7 | -4.3 | -4.6 | -4.4 | -4.4 | -4.6 | -4.1 | -4.6 | -4.1 | -4.7 | -4.5 | -5.1 | -4.5 | -4.5 | -4.4 | -4.3 | -4.6 | -4.4 | -1.1 | -4.5 | -4.6 | -4.6 | -5   | -4.5 | -4.7 | -4.7 | -4.7 | -4.9 | 0.67 |      |
| 91  | -4.6 | -4.3 | -4.7 | -4.4 | -4.5 | -4.5 | -4.3 | -4.5 | -4.3 | -4.8 | -4.8 | -4.6 | -4.8 | -5.2 | -4.5 | -4.3 | -4.6 | -4.5 | -4.6 | -4.4 | -2.4 | -4.6 | -4.8 | -4.6 | -4.7 | -4.4 | -4.5 | -4.5 | -4.5 | -4.7 | 0.44 |      |
| 92  | -5.3 | -5.1 | -5.2 | -4.7 | -5.2 | -5.2 | -5   | -5.1 | -5.7 | -5   | -5.6 | -4.9 | -5   | -5   | -5.6 | -5.2 | -4.8 | -4.8 | -4.9 | -4.7 | -5   | -5.9 | -5.7 | -5.3 | -5.2 | -5.4 | -5.1 | -5.4 | -5.3 | -5.3 | 0.30 |      |
| 93  | -4.7 | -3.9 | -4.4 | -4.1 | -4.6 | -4.5 | -4.4 | -4.2 | -5.9 | -4.5 | -4.1 | -4.4 | -4.3 | -4.7 | -4.4 | -4   | -4.3 | -5   | -4.9 | -4.4 | -4.7 | -4.6 | -5.5 | -4.4 | -4.6 | -4.8 | -5   | -4.8 | -4.9 | 0.43 |      |      |
| 94  | -4.5 | -3.5 | -3   | -2.9 | -4   | -4.2 | -3.9 | -3.5 | -4.7 | -2.9 | -3.6 | -3.1 | -3.5 | -3.6 | -3.7 | -3.5 | -3.4 | -3.7 | -4.7 | -4.2 | -0.4 | -4.3 | -4.8 | -4.4 | -4.5 | -4.4 | -4.4 | -4.1 | -4.5 | -4.4 | 0.85 |      |
| 95  | -3.5 | -3.2 | -3.2 | -3.4 | -3.6 | -3.5 | -3.1 | -3.3 | -4   | -3.4 | -3.6 | -3.2 | -3.4 | -3.7 | -3.4 | -3   | -3.2 | -3.7 | -3.6 | -3.5 | -3.1 | -4   | -3.8 | -3.8 | -3.7 | -3.5 | -3.6 | -3.6 | -3.5 | -3.6 | 0.25 |      |
| 96  | -4.9 | -4.4 | -4.4 | -4.5 | -4.9 | -4.6 | -4.5 | -4   | -4.8 | -4.6 | -4.1 | -4.4 | -4.7 | -4.7 | -4.3 | -4.4 | -5.1 | -5.1 | -4.8 | -3.6 | -5.6 | -5.1 | -4.7 | -4.9 | -4.8 | -4.8 | -4.9 | -4.9 | -4.9 | 0.38 |      |      |
| 97  | -5   | -5   | -4.7 | -4.8 | -5   | -4.6 | -4.7 | -4.8 | -5.2 | -5.1 | -4.4 | -4.8 | -4.6 | -5.5 | -4.8 | -5.2 | -4.8 | -4.6 | -5   | -5   | -0.6 | -6.4 | -5.6 | -5.9 | -5.3 | -5.1 | -5.4 | -5   | -5.3 | 0.91 |      |      |
| 98  | -4.4 | -4   | -4.4 | -4.4 | -4.2 | -4.2 | -4.2 | -4.2 | -4.9 | -4.3 | -4.2 | -4.3 | -4.4 | -4.4 | -4   | -4.1 | -4.2 | -4.2 | -4   | -4.6 | -5.3 | -4.6 | -4.9 | -4.4 | -4.2 | -4.3 | -4.3 | -4.3 | -4.4 | 0.28 |      |      |
| 99  | -5.5 | -5.1 | -4.9 | -4.3 | -4.5 | -4.5 | -4.5 | -5.5 | -6.1 | -4.6 | -5   | -4.6 | -4.5 | -5.2 | -5.2 | -5   | -4.4 | -4.7 | -5.8 | -4.6 | -4.7 | -6   | -5.8 | -5.6 | -5   | -5.8 | -5   | -5.8 | -5.5 | -4.9 | 0.53 |      |
| 100 | -5   | -4.4 | -4.2 | -4.1 | -5.2 | -4.9 | -4.2 | -4.6 | -5.2 | -4.4 | -4.7 | -4.1 | -4.4 | -4.8 | -4.6 | -4.5 | -4.3 | -4.6 | -5.2 | -4.6 | -3.7 | -5.3 | -5.5 | -5.2 | -5.2 | -4.9 | -4.9 | -5   | -5.1 | -5.1 | 0.44 |      |
| 101 | -4.6 | -4.2 | -4.3 | -4.3 | -4.3 | -4.1 | -4.3 | -4.4 | -4.2 | -4.5 | -4.1 | -4.3 | -4.4 | -4.7 | -4.3 | -4.2 | -4.2 | -4.2 | -4.1 | -3.9 | -5   | -4.6 | -5.1 | -4.7 | -4.2 | -4.7 | -4.3 | -4.5 | -4.7 | 0.27 |      |      |
| 102 | -5.6 | -4.9 | -4.5 | -4.3 | -5.2 | -5   | -4.4 | -4.8 | -4.6 | -4.3 | -4.7 | -3.8 | -4   | -4.9 | -5.1 | -4.3 | -4.5 | -4.7 | -5.1 | -5   | -3.6 | -5.7 | -5.4 | -5.5 | -5.6 | -5.4 | -5.5 | -5.1 | -5.6 | -5.7 | 0.58 |      |
| 103 | -5   | -3.4 | -2.9 | -2.8 | -5.2 | -5.2 | -4.4 | -3.3 | -6.3 | -0.3 | -5.5 | -0.4 | -3.6 | -5.3 | -5.7 | -2.4 | -4.6 | -4.3 | -5.9 | -5.9 | -2.5 | -4.8 | -5.9 | -5   | -6.6 | -5.7 | -6.1 | -6.2 | -6   | -6   | 1.67 |      |
| 104 | -5.3 | -3.9 | -0.9 | -2.3 | -5.2 | -4.8 | -3.7 | -3.8 | -5.6 | -2.2 | -4.5 | -1.1 | -4.6 | -2.5 | -4.4 | -1.2 | -3.9 | -5.2 | -5.1 | -5   | -1.4 | -5.3 | -5.8 | -5.2 | -5.7 | -5.4 | -5.4 | -5.6 | -5.5 | -5.7 | 1.57 |      |
| 105 | -5.3 | -4.9 | -3   | -1.2 | -5.1 | -4.9 | -5.5 | -3.7 | -6.4 | -1.3 | -5.5 | 1.3  | -5.4 | -4.2 | -5.6 | -0.2 | -5.2 | -5.9 | -5.7 | -4.7 | 2.8  | -3.8 | -6.1 | -5.6 | -6.7 | -6.2 | -6.4 | -6.6 | -6.2 | -6.5 | 2.44 |      |
| 106 | -6.5 | -6.2 | -5.5 | -4.7 | -6.3 | -5.7 | -4.5 | -6.2 | -5.7 | -5.6 | -4.9 | -5.1 | -5   | -5.5 | -4.8 | -5.6 | -5   | -5.6 | -5.7 | -5.1 | -1.8 | -6.7 | -6.2 | -6.4 | -5.8 | -5.8 | -6.3 | -6.3 | -5.8 | -5.9 | 0.91 |      |
| 107 | -5.3 | -4.8 | -4.8 | -4.9 | -5.2 | -5   | -4.5 | -5   | -5.1 | -5.1 | -5.3 | -4.9 | -4.8 | -5.2 | -4.7 | -5   | -4.5 | -5.2 | -5.3 | -4.9 | -4.6 | -5.4 | -5.7 | -5.3 | -5.5 | -5.3 | -5.1 | -5.4 | -5.4 | -5.2 | 0.30 |      |
| 108 | -5.6 | -5   | -4.5 | -4.3 | -5.5 | -5   | -4.5 | -4.5 | -6.2 | -3.3 | -5.2 | -2.4 | -5.6 | -4.5 | -5.3 | -4.6 | -5.1 | -6   | -5.7 | -5.4 | 1.8  | -5.1 | -6   | -5.6 | -5.7 | -5.5 | -5.8 | -5.8 | -5.7 | -5.7 | 1.51 |      |
| 109 | -6   | -4.2 | -4.3 | -3.3 | -6   | -5.3 | -4.7 | -4.1 | -6.4 | -3.5 | -6   | -3.1 | -5.6 | -5   | -5.3 | -2.5 | -5.2 | -5.7 | -5.9 | -5.9 | -4   | -5.3 | -6.4 | -5.7 | -6.4 | -6   | -6   | -6.4 | -6   | -6.5 | 2.01 |      |
| 110 | -4.5 | -4.6 | -3.5 | -3.3 | -4.6 | -5.1 | -4.5 | -4.6 | -5.2 | -3.3 | -5.3 | -0.7 | -4.1 | -4.3 | -4.5 | -3.9 | -4.3 | -4.5 | -6.6 | -4.4 | 4.7  | -5.7 | -6.5 | -6.1 | -5.4 | -5.5 | -6.1 | -5.9 | -5.3 | -5.6 | 2.08 |      |
| 111 | -4.5 | -4   | -4.3 | -3.2 | -5.2 | -5.3 | -4.6 | -4.6 | -4.5 | -4   | -4.4 | -1.5 | -4.5 | -4.6 | -4.6 | -4   | -4.2 | -5   | -6.6 | -4.7 | 5.9  | -5.3 | -6   | -6.2 | -5.3 | -5.9 | -6.1 | -6   | -5.6 | -5.3 | 2.20 |      |
| 112 | -4.6 | -4.4 | -4.4 | -4.1 | -4.1 | -4.2 | -3.9 | -4.7 | -4.5 | -4.5 | -4.2 | -4.3 | -4.1 | -4.7 | -4.6 | -4.4 | -4.3 | -4.1 | -4.4 | -4   | -4.2 | -5.2 | -4.7 | -4.6 | -4.7 | -4.4 | -4.5 | -4.5 | -4.5 | -4.7 | 0.27 |      |
| 113 | -5.1 | -4.6 | -5.5 | -5   | -4.9 | -5.2 | -4.7 | -5   | -6   | -5   | -5.2 | -5   | -4.9 | -5.5 | -5.6 | -4.5 | -5.1 | -4.7 | -4.8 | -4.7 | -5   | -6   | -5   | -5.2 | -5.4 | -4.8 | -5.3 | -5   | -5.1 | -5.2 | 0.36 |      |
| 114 | -5.9 | -5.4 | -5.6 | -5.5 | -5.5 | -5.2 | -5.1 | -5.9 | -5.8 | -5.3 | -5.3 | -6   | -5.5 | -6.3 | -5.7 | -5.5 | -5.3 | -5.3 | -5.5 | -5.1 | 0.3  | -5.7 | -5.6 | -6.2 | -5.9 | -5.9 | -5.6 | -6.1 | -5.9 | -6   | 1.13 |      |
| 115 | -5.3 | -5.9 | -5   | -5.1 | -4.9 | -4.7 | -4.6 | -6.1 | -5.5 | -5.3 | -5.5 | -4.8 | -4.9 | -5.5 | -5.6 | -5.6 | -5.5 | -4.9 | -5.3 | -5.1 | -2.6 | -5.3 | -6.1 | -5.7 | -5.5 | -5.4 | -5.5 | -5.5 | -5.5 | -5.6 | 0.63 |      |
| 116 | -4.4 | -3.9 | -5   | -4.6 | -4.4 | -4.5 | -4.3 | -4.4 | -4.3 | -4.4 | -4.2 | -4.9 | -4.5 | -5   | -4.8 | -4.2 | -4.5 | -4.3 | -4.3 | -4.1 | -3.9 | -4.5 | -4.4 | -4.8 | -4.7 | -4.3 | -4.3 | -4.4 | -4.3 | -4.6 | 0.27 |      |
| 117 | -4.2 | -3.7 | -4.3 | -4.3 | -4.1 | -4.6 | -4.3 | -4.1 | -4.6 | -4.4 | -4.4 | -4.3 | -4.2 | -4.1 | -4.3 | -3.8 | -3.9 | -4   | -4.2 | -4.1 | -4.3 | -4.9 | -4.1 | -4.4 | -4.3 | -4.2 | -4.2 | -4.2 | -4.1 | -4.3 | 0.23 |      |
| 118 | -3.9 | -3.4 | -3.6 | -3.5 | -3.6 | -3.8 | -3.6 | -3.6 | -4.2 | -3.4 | -3.4 | -3.8 | -3.6 | -3.9 | -3.5 | -3.4 | -3.3 | -3.8 | -3.9 | -3.8 | -2.4 | -3.9 | -4.5 | -4.2 | -4.3 | -3.8 | -3.7 | -4.2 | -4.2 | -4.3 | 0.41 |      |
| 119 | -5.7 | -4.9 | -4.8 | -4.9 | -5.2 | -4.3 | -4.4 | -5.4 | -6.1 | -5.3 | -5.5 | -4.4 | -4.9 | -5.1 | -4.9 | -5   | -4.6 | -4.3 | -5.6 | -4.3 | -4.8 | -6.1 | -5.5 | -4.8 | -5.5 | -5.8 | -5.7 | -5.9 | -5.7 | -5.7 | 0.55 |      |
| 120 | -5.5 | -4.4 | -4.8 | -4.6 | -5.1 | -5.7 | -5.1 | -4.6 | -5.7 | -4.4 | -5.1 | -4.7 | -5.2 | -5.3 | -4.4 | -4.3 | -4.6 | -5.2 | -5.2 | -5   | -3.7 | -5.3 | -4.9 | -5.1 | -5.5 | -5.2 | -5.6 | -5.4 | -5.4 | -5.7 | 0.49 |      |
| 121 | -5.5 | -4.4 | -4.4 | -4.5 | -5.2 | -4.9 | -4.9 | -4.8 | -5.3 | -4.9 | -5   | -4.3 | -4.9 | -4.8 | -5.2 | -4.7 | -4.3 | -5.2 | -5.2 | -5.2 | -3.8 | -5.4 | -5.4 | -4.8 | -5.7 | -5.1 | -5.5 | -5.4 | -5.5 | -5.6 | 0.46 |      |
| 122 | -4.5 | -4   | -4   | -4.2 | -4.5 | -4.6 | -4.4 | -4   | -5   | -4.1 | -4.2 | -4.2 | -4.2 | -4.5 | -4   | -4.1 | -4   | -4.4 | -4.6 | -4.1 | -4.8 | -5   | -4.9 | -4.5 | -4.1 | -4.3 | -4.3 | -4.2 | -4.4 | -4.1 | 0.30 |      |
| 123 | -4.9 | -4.5 | -4.4 | -4.7 | -4.2 | -4.4 | -4.3 | -5   | -4.8 | -4.3 | -4.7 | -4.4 | -4   | -4.8 | -4.6 | -4.4 | -4.2 | -4.5 | -4.7 | -4.4 | -4.3 | -5.7 | -5.3 | -5   | -4.6 | -4.5 | -4.7 | -4.8 | -4.8 | -4.8 | 0.35 |      |
| 124 | -5.1 | -4.4 | -4.3 | -4.3 | -4.4 | -4.1 | -4.2 | -4.6 | -4.5 | -4.5 | -4   | -4.1 | -4.5 | -4.5 | -4.2 | -4.2 | -4.1 | -4.6 | -4.1 | -4.1 | -3.9 | -4.9 | -4.6 | -4.8 | -4.7 | -4.7 | -5.1 | -4.7 | -5   | -5.2 | 0.35 |      |
| 125 | -4.7 | -4.4 | -4.8 | -4.6 | -4.6 | -4.4 | -4.6 | -4.7 | -4.8 | -4.8 | -4.4 | -4.9 | -4.7 | -5.1 | -4.5 | -4.3 | -4.6 | -4.4 | -4.7 | -4.4 | -3.5 | -5.2 | -5   | -5.2 | -5   | -4.6 | -4.8 | -4.6 | -4.6 | -4.8 | 0.32 |      |
| 126 | -4.6 | -4.7 | -4.4 | -4.6 | -4.1 | -4.2 | -4.1 | -5.2 | -4.6 | -4.2 | -4.2 | -4.4 | -4.1 | -4.6 | -4.7 | -4.3 | -4.3 | -4.4 | -4.6 | -4.6 | -4.5 | -5.6 | -5.5 | -5   | -4.8 | -5   | -4.6 | -4.4 | -4.5 | -4.7 | 0.38 |      |
| 127 | -6.4 | -6.2 | -6.5 | -5.5 | -5.9 | -5.7 | -6   | -6.5 | -5.7 | -6.1 | -6.1 | -5.9 | -5.6 | -6.9 | -6.6 | -6.3 | -6.3 | -5.3 | -6.4 | -5.7 | 1.2  | -5.7 | -6.1 | -6.2 | -6.2 | -6.6 | -6.1 | -6.5 | -6.4 | -6.4 | 1.39 |      |
| 128 | -5.8 | -5.2 | -4.7 | -4.4 | -5.3 | -5   | -5.1 | -5.4 | -5.3 | -5.2 | -5.1 | -4.5 | -5.1 | -5.2 | -5.1 | -5.4 | -4.7 | -5.2 | -5.7 | -5.8 | -0.8 | -5.9 | -6.1 | -5.9 | -6.1 | -6.4 | -6   | -6.2 | -6.1 | -6   | 1.00 |      |
| 129 | -6.3 | -6.2 | -5.7 | -5.8 | -6.1 | -5.7 | -5.4 | -6.3 | -5.7 | -5.8 | -5.6 | -5.6 | -5.6 | -6.3 | -5.7 | -5.8 | -5.7 | -5.6 | -6.2 | -5.7 | -2.6 | -7.1 | -6.2 | -6.6 | -6.4 | -6.1 | -6.3 | -6.2 | -6.3 | -6.3 | 0.73 |      |
| 130 | -5.1 | -4.6 | -4.4 | -3.9 | -4.7 | -4.8 | -3.7 | -4.7 | -4.6 | -4.7 | -4.4 | -4.1 | -3.7 | -4.7 | -4.9 | -3.9 | -4.8 | -4.9 | -4.4 | -3.6 | -5.4 | -5.3 | -5.6 | -5.3 | -5.2 | -5.3 | -5   | -5.1 | -5.1 | 0.54 |      |      |
| 131 | -6.2 | -5.5 | -5.7 | -5.2 | -5.7 | -5.6 | -4.9 | -5.8 | -5.6 | -4.9 | -5.8 | -5.5 | -5.4 | -5.2 | -5.2 | -5.9 | -5.5 | -5.9 | -5.4 | -5.5 | -6.3 | -5.9 | -4.7 | -6.4 | -6.2 | -5.4 | -5.8 | -6.1 | -6.1 | -6.2 | -6   | 0.54 |
| 132 | -5.6 | -4.9 | -5.3 | -5.1 | -5.6 | -4.9 | -4.6 | -5.4 | -5.5 | -5.4 | -5   | -5.2 | -5.2 | -5.4 | -5.2 | -4.9 | -4.9 | -4.8 | -5.7 | -5.2 | -4.2 | -6.2 | -5.8 | -5.6 | -6   | -5.7 | -5.8 | -6.2 | -6.2 | 0.47 |      |      |
| 133 | -5.5 | -5.3 | -5   | -5   | -5.2 | -5.1 | -5   | -5.7 | -5   | -5.3 | -5.1 | -5   | -4.9 | -5.6 | -5.3 | -4.9 | -5   | -4.8 | -5.4 | -5   | -4.6 | -6.2 | -5.2 | -5.7 | -5.4 | -5.2 | -5.2 | -5.3 | -5.4 | -5.7 | 0.33 |      |
| 134 | -4.4 | -4   | -4   | -4.1 | -4.5 | -4.5 | -4   | -3.9 | -5.2 | -4   | -5   | -3.7 | -4.5 | -4.9 | -4.5 | -3.8 | -4.1 | -4.7 | -4.7 | -4.4 | -3.4 | -4.2 | -4.9 | -4.5 | -5.1 | -4.6 | -4.9 | -5   | -4.8 | -5.1 | 0.47 |      |
| 135 | -5.3 | -4.6 | -4.2 | -4   | -4.9 | -4.7 | -4   | -4.6 | -4.5 | -4.7 | -4.7 | -4.1 | -4   | -4.6 | -4.6 | -5   | -4   | -4.6 | -4.7 |      |      |      |      |      |      |      |      |      |      |      |      |      |

|     |      |      |      |      |      |      |      |      |      |      |        |      |      |      |      |      |      |      |      |      |      |      |      |      |      |      |      |      |      |      |      |      |
|-----|------|------|------|------|------|------|------|------|------|------|--------|------|------|------|------|------|------|------|------|------|------|------|------|------|------|------|------|------|------|------|------|------|
| 176 | -4.4 | -3.9 | -4.3 | -4.2 | -4.1 | -3.9 | -4   | -4.1 | -4.3 | -4.2 | -4.2   | -4.5 | -3.9 | -4.6 | -4.2 | -3.8 | -3.9 | -4.2 | -4.1 | -4   | -3.8 | -4.5 | -4   | -4.5 | -4.5 | -4.2 | -4.5 | -4.4 | -4.3 | -4.5 | 0.24 |      |
| 177 | -4.6 | -4.2 | -4.3 | -4.2 | -4   | -4.3 | -4.1 | -4.2 | -4.2 | -4   | -3.9   | -4   | -3.9 | -4.4 | -4   | -4.1 | -3.7 | -4.1 | -4.1 | -3.8 | -4   | -4.8 | -4.5 | -4.6 | -4.6 | -4.5 | -4.6 | -4.6 | -4.6 | -4.7 | 0.30 |      |
| 178 | -4.2 | -4.5 | -4   | -1.7 | -3.6 | -4   | -2.9 | -3.5 | -5.6 | -2   | -4     | -2.7 | -3.4 | -4.4 | -3.9 | -4.1 | -4.5 | -4.6 | -5.1 | -3.9 | 1.5  | -4.4 | -5   | -4.8 | -4.8 | -5   | -4.9 | -6.2 | -5.1 | -4.8 | 1.43 |      |
| 179 | -4.1 | -2.7 | -1.7 | -1.4 | -4   | -4.6 | -2.9 | -3.4 | -5   | -1.5 | -4.1   | -2.2 | -2.6 | -4   | -4   | -1.7 | -3.4 | -3.4 | -3.7 | -3.3 | 0.2  | -3.1 | -5.6 | -5.1 | -5.3 | -5.6 | -5   | -5.8 | -5.3 | -5.6 | 1.51 |      |
| 180 | -5.2 | -5.1 | -5.3 | -5   | -4.8 | -4.8 | -4.4 | -5.3 | -4.7 | -5   | -4.7   | -4.8 | -5   | -5.4 | -4.7 | -5.3 | -5   | -4.7 | -5.1 | -4.6 | -2.7 | -5.9 | -5.3 | -5.4 | -5.1 | -5.1 | -5.2 | -5.2 | -5.2 | -5.2 | 0.53 |      |
| 181 | -4.1 | -3.7 | -4.4 | -4.2 | -4.2 | -4.2 | -3.9 | -4   | -4.1 | -4.1 | -4     | -4.5 | -4.2 | -4.5 | -4.2 | -3.8 | -4.2 | -4.1 | -4   | -3.9 | -4.8 | -3.8 | -4.4 | -3.9 | -4.1 | -3.9 | -4   | -4.1 | -4   | -4.1 | 0.23 |      |
| 182 | -4.7 | -4.9 | -4.6 | -3.4 | -4.9 | -4.9 | -4.8 | -4.6 | -5.2 | -3.7 | -6     | -2.9 | -3.4 | -4.8 | -4.3 | -2.4 | -4.1 | -4.7 | -6.6 | -5.1 | 3.6  | -5.8 | -7.5 | -6.4 | -5.5 | -5.1 | -4.9 | -5   | -5   | -5.2 | 1.86 |      |
| 183 | -5.2 | -5   | -4.9 | -4.6 | -4.7 | -4.5 | -4.4 | -5.4 | -5   | -5.1 | -4.6   | -4.6 | -4.5 | -5.6 | -4.6 | -5.1 | -4.7 | -4.8 | -4.8 | -5   | -2.7 | -5.9 | -5.7 | -5.8 | -5.1 | -5.4 | -5.2 | -5.3 | -5.3 | -5.1 | 0.58 |      |
| 184 | -6.2 | -5.6 | -5.2 | -5.3 | -5.2 | -5.3 | -5   | -6.1 | -5.5 | -5.5 | -4.7   | -5   | -4.7 | -5.9 | -5.2 | -5.6 | -5.5 | -5.2 | -4.2 | -5.5 | 0.5  | -6.5 | -6.5 | -6.1 | -5.9 | -6   | -6.2 | -6.3 | -6.4 | -6.3 | 1.08 |      |
| 185 | -5   | -4.5 | -4.1 | -3.4 | -5.2 | -4.4 | -4.6 | -4.8 | -5.8 | -3.7 | -5.1   | -4.3 | -4.1 | -5.1 | -4.8 | -4   | -4.5 | -5.2 | -5.3 | -4.8 | -0.5 | -4.9 | -5.3 | -5   | -5.2 | -5.2 | -5   | -5.2 | -5.4 | -5.1 | 0.95 |      |
| 186 | -5.3 | -4.8 | -3.5 | -3.9 | -5.5 | -5   | -4.2 | -4.7 | -5.7 | -3.5 | -5.7   | -4   | -4.4 | -4.4 | -5.4 | -3.9 | -4.2 | -5   | -5.5 | -5.1 | -2.7 | -5.5 | -6.1 | -5.3 | -5.8 | -6   | -5.7 | -6   | -5.8 | -5.8 | 0.87 |      |
| 187 | -5.7 | -5.5 | -5   | -5.2 | -5.2 | -5.3 | -5.8 | -5.3 | -5.5 | -5.2 | -5.2   | -4.9 | -5.7 | -5.7 | -5.1 | -5.4 | -5.1 | -5.5 | -5.1 | -4   | -6.5 | -5.6 | -5.9 | -5.6 | -5.4 | -5.6 | -5.4 | -5.5 | -5.8 | -5.4 | 0.42 |      |
| 188 | -6   | -6   | -6.3 | -5.1 | -5.7 | -5.6 | -5.8 | -6.4 | -5.6 | -5.5 | -5.7   | -5.7 | -5.3 | -6.7 | -6   | -6.3 | -5.8 | -5.6 | -6.1 | -5.7 | 1.1  | -5.8 | -6.3 | -6.1 | -6   | -6.1 | -6   | -6.3 | -6   | -6   | 1.32 |      |
| 189 | -5.2 | -5.1 | -4.6 | -4.6 | -4.7 | -4.5 | -4.2 | -5.5 | -4.7 | -4.6 | -4.6   | -4.3 | -4.4 | -5.1 | -5   | -5   | -4.8 | -4.3 | -5.1 | -4.6 | -4   | -5.9 | -4.9 | -5.5 | -5.4 | -4.8 | -5.3 | -5   | -5.1 | -5.3 | 0.44 |      |
| 190 | -5.9 | -4.5 | -4.4 | -4.3 | -5.7 | -5.2 | -4.9 | -4.8 | -6.3 | -4.9 | -5.8   | -4.1 | -4.6 | -5.2 | -5.5 | -4.2 | -4.7 | -5.9 | -6.2 | -5.5 | -2.8 | -5.9 | -6.8 | -6.1 | -6   | -6   | -6.1 | -6.1 | -5.9 | -6.1 | 0.88 |      |
| 191 | -5.1 | -1.2 | -1.5 | -1.8 | -0.2 | -4.5 | 0.2  | -2.6 | -6.4 | 0.7  | -6     | -5.5 | -6.4 | -1   | -5.6 | 2.8  | -4.4 | -4.3 | -4.4 | -4.5 | 3.3  | -4   | -6   | -4.8 | -5.9 | -5.9 | -6.1 | -6.3 | -6.1 | -6   | 3.26 |      |
| 192 | -5.4 | -4.8 | -4.9 | -2.9 | -4.9 | -4.8 | -4.4 | -5.3 | -4.9 | -4.9 | -5.2   | -4.5 | -5.1 | -5.5 | -4.9 | -4.8 | -4.8 | -4.9 | -5.3 | -5.5 | -1.7 | -6.1 | -6.6 | -5.9 | -5.5 | -5.7 | -5.4 | -5.6 | -5.3 | -5.5 | 0.89 |      |
| 193 | -5.4 | -5.4 | -4.8 | -4.8 | -5   | -4.4 | -4.2 | -5.4 | -4.9 | -4.7 | -4.6   | -4.5 | -4.7 | -5.6 | -4.7 | -5.2 | -4.8 | -4.6 | -5.4 | -4.7 | -2.7 | -6.1 | -5.5 | -5.7 | -5.4 | -5.4 | -5.3 | -5.6 | -5.5 | -5.4 | 0.63 |      |
| 194 | -5.4 | -5.5 | -5.1 | -5.3 | -5.1 | -4.9 | -4.7 | -5.9 | -5.1 | -5.6 | -5     | -5.2 | -4.8 | -5.5 | -5.5 | -5.4 | -5.2 | -4.8 | -5.3 | -4.9 | -4.1 | -6.4 | -5.4 | -5.8 | -5.4 | -5.2 | -5.3 | -5.4 | -5.3 | -5.5 | 0.41 |      |
| 195 | -6.2 | -5.7 | -5.8 | -5.7 | -5.7 | -5.6 | -5.7 | -6.2 | -6.2 | -5.9 | -5.3   | -6.1 | -5.7 | -6.3 | -5.8 | -5.6 | -5.9 | -5.9 | -6.1 | -5.8 | -4.2 | -5.8 | -6   | -5.9 | -6.5 | -6.3 | -6.4 | -6.1 | -6.3 | -6.4 | 1.88 |      |
| 196 | -5.2 | -5.1 | -4.6 | -4.7 | -5.2 | -4.7 | -4.1 | -5.2 | -4.8 | -5   | -5.1   | -4.7 | -4.2 | -5.2 | -5.1 | -5.4 | -4.9 | -4.5 | -5   | -4.6 | -2.4 | -6.2 | -5.3 | -5.3 | -5.1 | -5.2 | -5.2 | -5.4 | -5.4 | -5.4 | 0.63 |      |
| 197 | -5.9 | -3.3 | -2.8 | -3.2 | -5.5 | -5.3 | -3.7 | -4.3 | -6.5 | -5.7 | -5.5   | 1.8  | -4.4 | -4.5 | -4.9 | 1.2  | -4.3 | -5.8 | -6.3 | -5.5 | -3.1 | -5.9 | -7.1 | -5.7 | -6.4 | -6.6 | -6.3 | -6.3 | -6.4 | -6.3 | 2.08 |      |
| 198 | -3.9 | -3.5 | -3.7 | -3.5 | -3.4 | -3.5 | -3.6 | -3.8 | -3.8 | -3.7 | -3.4   | -3.7 | -3.6 | -3.9 | -3.5 | -3.7 | -3.6 | -3.5 | -3.6 | -3.5 | -3.6 | -3.5 | -4.2 | -4.1 | -3.9 | -4.1 | -3.9 | -3.7 | -3.9 | -3.8 | -3.9 | 0.21 |
| 199 | -4.9 | -3.7 | -4.2 | -3.9 | -4.9 | -4.8 | -4.3 | -4.4 | -4.8 | -3.7 | -4.5   | -3.7 | -4.2 | -4.3 | -4.5 | -3.5 | -3.8 | -4.8 | -5   | -4.8 | -4.2 | -4.6 | -4.8 | -4.4 | -5   | -4.7 | -4.6 | -5   | -4.8 | -4.9 | 0.45 |      |
| 200 | -5.3 | -4.5 | -4.9 | -5   | -5.1 | -4.8 | -5.3 | -4.9 | -6   | -4.7 | -5.5   | -4.7 | -5.4 | -4.9 | -5.1 | -4.6 | -4.9 | -5.5 | -5.4 | -5.1 | -4.4 | -5.8 | -5.5 | -5.2 | -5.5 | -5.1 | -5.1 | -5.2 | -5.1 | -5.4 | 0.37 |      |
| 201 | -6.2 | -5.4 | -4.4 | -5   | -5.5 | -5.6 | -4.9 | -5.7 | -5.7 | -5.5 | -5.6   | -5   | -5   | -5.9 | -5.6 | -5.4 | -5   | -5.4 | -5.8 | -5.7 | -3   | -6.9 | -6.1 | -6.1 | -5.9 | -6.1 | -6.2 | -6.1 | -6.1 | -6.1 | -6.1 | 0.70 |
| 202 | -0.4 | -4.6 | 14.2 | 14   | 0.1  | -1.6 | 10.5 | 8.9  | 5    | 16.5 | -0.3   | 13.1 | -2.3 | 13.5 | 0.3  | 11.6 | 6.7  | -0.3 | -2.2 | 0.9  | 14.3 | 0.6  | -5.5 | -1.8 | -4.6 | -5.1 | -6.4 | -5.4 | -5.8 | -5.4 | 7.46 |      |
| 203 | -6.2 | -4.2 | -4.1 | -2.8 | -5.6 | -5.2 | -4.9 | -4   | -6.4 | -3.1 | -5.7   | -2.8 | -4.5 | -4   | -6.2 | -3.2 | -4.1 | -5.7 | -6.6 | -5.7 | -3.1 | -6   | -6.2 | -6.1 | -6.1 | -6.2 | -6.6 | -6.4 | -6.5 | -6.5 | 1.30 |      |
| 204 | -6   | -5.7 | -4.6 | -4.6 | -5   | -5.5 | -5.2 | -6   | -5.1 | -5.3 | -4.6   | -4.5 | -4.9 | -5.9 | -5.4 | -5.9 | -5.2 | -5.4 | -5.6 | -5.4 | 0.6  | -6.2 | -5.9 | -5.5 | -5.8 | -5.8 | -5.5 | -6   | -5.8 | -6   | 1.21 |      |
| 205 | -5.5 | -4.9 | -4.6 | -4.1 | -4.8 | -5.1 | -4   | -4.5 | -5.6 | -4.6 | -4.8   | -4.7 | -5.3 | -5.3 | -4.5 | -4.8 | -5   | -4.9 | -5.4 | -4.7 | -2.2 | -5.8 | -6.1 | -5.7 | -6.1 | -5.6 | -6.2 | -5.8 | -5.6 | -5.4 | 0.79 |      |
| 206 | -2.6 | -0.7 | 6.6  | 5.7  | -3.6 | -3.3 | -0.4 | -1.2 | -6.6 | -4   | -2.8   | 6.9  | -0.6 | 1.9  | -2.9 | -8.4 | -3.1 | -4   | -4.6 | -4.7 | 9.1  | -1.8 | -5.6 | -4.7 | -6   | -6.1 | -6.2 | -6.1 | -6.1 | -6.4 | 4.81 |      |
| 207 | -5.3 | -4.4 | -4.4 | -4.1 | -5   | -5   | -4   | -4.7 | -4.7 | -4.5 | -4.8   | -4   | -3.9 | -4.7 | -4.9 | -4.7 | -4.1 | -4.6 | -5.1 | -4.6 | -3.3 | -5.9 | -5.5 | -5.6 | -5.3 | -4.9 | -5.6 | -5   | -5.2 | -5.3 | 0.59 |      |
| 208 | -5.2 | -5   | -4.9 | -4.6 | -5   | -4.8 | -4.3 | -5.5 | -5.2 | -5   | -4.7   | -4.8 | -4.5 | -5   | -5   | -5.1 | -4.9 | -4.8 | -5.2 | -4.8 | -4.5 | -6.2 | -5.7 | -5.4 | -5.2 | -5.1 | -5   | -5.2 | -5.2 | -5.2 | 0.37 |      |
| 209 | -7   | -5.1 | -5   | -5.2 | -6.3 | -6.5 | -5.4 | -5.4 | -7   | -5.2 | -5.4   | -6   | -5.5 | -5.4 | -5.6 | -4.9 | -4.8 | -6.1 | -6.8 | -6.6 | 3.1  | -6.7 | -7.8 | -5.5 | -6.1 | -7.1 | -7.1 | -6.1 | -7.2 | -6   | 1.85 |      |
| 210 | -6.8 | -4.4 | -3.3 | -4   | -6.2 | -6.1 | -5.5 | -4.8 | -6.7 | -3.2 | -5.6   | -2.9 | -5.7 | -4.2 | -5.4 | -3.1 | -4.2 | -6   | -6.3 | -6   | -1.2 | -6.2 | -7.7 | -5.5 | -6.3 | -6.9 | -6.9 | -5.9 | -7   | -6.2 | 1.50 |      |
| 211 | -5.4 | -4.7 | -5   | -5   | -5.9 | -5.5 | -4.8 | -5.2 | -6   | -5.4 | -5.7   | -4.8 | -5.3 | -5.7 | -5   | -4.7 | -4.9 | -5.8 | -5.8 | -5.3 | -4.5 | -6.3 | -6   | -5.9 | -5.3 | -5.4 | -5.4 | -5.4 | -5.5 | -5.4 | 0.45 |      |
| 212 | -3.8 | -2.1 | -1   | 2.7  | -4.7 | -4.3 | -3.8 | 1.8  | -6.4 | -3.4 | -5.6   | 11.4 | -4   | -2.3 | -5   | 2.3  | -2.7 | -4.9 | -5.4 | -5.4 | 0    | -6.4 | -6.4 | -4.8 | -6.3 | -6.1 | -6.6 | -6.2 | -6.4 | -6.4 | 4.08 |      |
| 213 | -6.5 | -5   | -3.4 | -4.7 | -5.9 | -5.8 | -5.5 | -4.6 | -6.3 | -3.9 | -5.8   | -3.4 | -5.2 | -5.2 | -5.5 | -2.6 | -4.6 | -6.6 | -6.4 | -6.1 | 0.9  | -5.1 | -7.5 | -5.7 | -6.3 | -6.6 | -6.6 | -6.8 | -6.8 | -6.5 | 1.65 |      |
| 214 | -5.6 | -4.7 | -4.7 | -4.7 | -6.1 | -6   | -4.7 | -4.8 | -6.3 | -4.5 | -5.9   | -4.6 | -5.3 | -5.8 | -5.2 | -3.9 | -4.8 | -6.3 | -6.6 | -6.1 | -4.4 | -5.5 | -7.6 | -5.6 | -6.5 | -6.6 | -6.8 | -6.8 | -6.9 | -6.4 | 0.93 |      |
| 215 | -5.6 | -4.7 | -4.7 | -4.9 | -5   | -4.7 | -4.4 | -5   | -4.5 | -5.3 | -5.5   | -4.5 | -4.3 | -5.6 | -5.1 | -4.6 | -4.6 | -4.8 | -5.2 | -4.6 | 0.8  | -5.8 | -5.5 | -5.1 | -5.5 | -5.2 | -5.4 | -5.2 | -5.6 | -5.7 | 1.15 |      |
| 216 | -5.2 | -4.8 | -4.7 | -4.7 | -5.2 | -4.5 | -4.7 | -4.9 | -5.4 | -4.5 | -5.5   | -5.2 | -4.4 | -4.5 | -4.6 | -5   | -4.4 | -4.6 | -4.9 | -5   | -4.8 | -4.5 | -4.9 | -5.3 | -4.9 | -5.3 | -4.6 | -5.4 | -4.8 | -5   | 0.31 |      |
| 217 | -4.7 | -3.9 | -4   | -4.2 | -4.6 | -5.3 | -4.7 | -4   | -5.2 | -5.1 | -4.6   | -4.4 | -4.8 | -4.2 | -4.8 | -3.7 | -3.9 | -4.8 | -4.6 | -4.8 | -3.7 | -4.3 | -5.1 | -4.8 | -4.8 | -4.7 | -4.8 | -4.7 | -4.6 | -4.8 | 0.43 |      |
| 218 | -3.8 | -3.5 | -4.1 | -3.9 | -3.6 | -4.1 | -3.5 | -3.8 | -4.1 | -3.9 | -3.8   | -4   | -3.9 | -4   | -3.8 | -3.6 | -4   | -3.6 | -3.8 | -3.6 | -3.9 | -4.7 | -3.7 | -4.1 | -3.8 | -3.6 | -3.7 | -3.7 | -3.7 | -3.7 | 0.24 |      |
| 219 | -6.2 | -5.6 | -4.7 | -4.8 | -5.2 | -5.2 | -4.5 | -5.4 | -5.5 | -5.3 | -5     | -4.9 | -4.5 | -5.3 | -5.3 | -5.7 | -4.8 | -5.3 | -5.5 | -5.4 | -3.3 | -6.4 | -6.2 | -5.9 | -6   | -5.9 | -5.9 | -5.9 | -6   | -6.1 | 0.65 |      |
| 220 | -5.1 | -5.3 | -4.6 | -4.4 | -5   | -4.7 | -4.6 | -5.7 | -5.8 | -4.6 | -5.3   | -4.9 | -4.9 | -5.5 | -4.9 | -5.2 | -5.2 | -5.5 | -5.5 | -5.3 | -2.7 | -6.1 | -6.5 | -5.4 | -5.5 | -5.4 | -5.5 | -5.4 | -5.5 | -5.5 | 0.63 |      |
| 221 | -4.6 | -4.5 | -4.4 | -4.3 | -4.9 | -4.6 | -4.2 | -4.8 | -5.5 | -4.5 | -4.9   | -4.3 | -4.8 | -5.1 | -4.3 | -4.3 | -4.4 | -5.1 | -4.8 | -4.5 | -2.1 | -4.7 | -5.3 | -4.9 | -4.9 | -4.9 | -5.1 | -4.7 | -4.9 | -5.9 | 0.59 |      |
| 222 | -5.8 | -5.1 | -5.1 | -5.1 | -5.5 | -5.2 | -4.6 | -3.2 | -5.9 | -4.1 | -5.4   | 0.1  | -5.8 | -5.7 | -5.5 | -1.2 | -4.9 | -6.2 | -5.9 | -5.8 | 13.1 | -5.4 | -6.5 | -5.5 | -6.1 | -5.8 | -6   | -5.9 | -6   | -6.1 | 3.62 |      |
| 223 | -5.1 | -4.5 | -2.3 | -4   | -5.1 | -5.1 | -5.6 | -2.8 | -4.9 | -1.3 | -6     | 3.5  | -6.7 | -2.5 | -5.9 | -1.5 | -5.4 | -5.4 | -6.4 | -5.8 | 5.5  | -5.2 | -6.8 | -4.9 | -6.8 | -6.2 | -6.5 | -6.8 | -6.4 | -6.4 | 2.90 |      |
| 224 | -5.6 | -5   | -4.6 | -3.2 | -5.7 | -5.3 | -5.4 | -5.3 | -6.9 | -4.1 | -4.7</ |      |      |      |      |      |      |      |      |      |      |      |      |      |      |      |      |      |      |      |      |      |

|     |      |      |      |      |      |      |      |      |      |      |      |      |      |      |      |      |      |      |      |      |      |      |      |      |      |      |      |      |      |       |       |
|-----|------|------|------|------|------|------|------|------|------|------|------|------|------|------|------|------|------|------|------|------|------|------|------|------|------|------|------|------|------|-------|-------|
| 265 | -5.1 | -4.5 | -5.4 | -5.3 | -5.4 | -5   | -4.5 | -4.9 | -5.7 | -4.9 | -5.3 | -4.8 | -4.8 | -5.6 | -4.8 | -4.3 | -5   | -5.3 | -5   | -5   | -1.7 | -5.6 | -5.4 | -5.6 | -5.3 | -5.2 | -5.1 | -5.4 | -5.2 | -5.2  | 0.71  |
| 266 | -6.2 | -5.4 | -5.1 | -5.2 | -5.6 | -5.5 | -4.6 | -5.6 | -5.4 | -5.1 | -4.9 | -4.9 | -4.3 | -5.6 | -5.7 | -5.3 | -5.3 | -4.9 | -5.6 | -4.9 | -1.2 | -6.7 | -6.3 | -6.3 | -6.1 | -6.2 | -6   | -5.8 | -5.5 | -5.6  | 0.96  |
| 267 | -5.7 | -4.9 | -5.1 | -4.5 | -5.6 | -5.3 | -5.3 | -5.1 | -6.3 | -5.6 | -5.9 | -5.7 | -5.4 | -5.3 | -5.5 | -5.1 | -4.9 | -5.8 | -5.9 | -5.5 | -5.3 | -6.1 | -6   | -5.6 | -5.8 | -5.6 | -5.6 | -5.7 | -5.6 | -5.8  | 0.39  |
| 268 | -3.4 | -3.2 | -3.6 | -3.5 | -3.6 | -3.6 | -3.4 | -3.3 | -4.1 | -3.6 | -3.4 | -3.5 | -3.3 | -3.7 | -3.4 | -3.3 | -3.4 | -3.3 | -3.7 | -3.5 | -2.4 | -3.8 | -3.9 | -3.9 | -3.6 | -3.4 | -3.4 | -3.6 | -3.6 | -3.5  | 0.29  |
| 269 | -6.1 | -2.6 | 0    | 0.2  | -6.2 | -5.7 | -3.8 | 4.4  | -6.2 | 3.4  | -6.4 | 2.1  | -2.8 | 4.5  | -4.4 | 0.2  | -3.9 | -5.6 | -6.7 | -5.4 | -0.4 | -3.3 | -6   | -3.1 | -6.3 | -6.3 | -6.1 | -6.4 | -6.3 | -6.3  | 3.54  |
| 270 | -6   | -5.7 | -4.6 | -4.7 | -5.3 | -4.9 | -4.4 | -5.3 | -5.6 | -5.4 | -4.8 | -4.6 | -4.7 | -5.7 | -5.1 | -5.3 | -5.4 | -5   | -6   | -5.1 | -1.7 | -6.1 | -5.7 | -5.8 | -6   | -5.8 | -6.2 | -6.1 | -6   | -6.2  | 0.87  |
| 271 | -5.3 | -5   | -5   | -4.4 | -5.1 | -4.7 | -5.3 | -5.2 | -4.2 | -4.5 | -5   | -5.4 | -4.7 | -4.2 | -4.2 | -4.7 | -5.5 | -3.9 | -4.1 | -4.1 | -4   | -4.1 | -4.1 | -4.5 | -4.3 | -4.4 | -3.9 | -4.2 | -4.1 | -4    | 0.49  |
| 272 | -4.5 | -4.5 | -4.1 | -4.6 | -3.7 | -4.5 | -4.3 | -4.1 | -4.6 | -4.6 | -4.4 | -4.1 | -4.1 | -4.4 | -3.9 | -4.9 | -4.3 | -3.8 | -3.8 | -3.8 | -3.8 | -4.3 | -3.9 | -4.9 | -4.3 | -4.1 | -4   | -4.3 | -4.2 | -4.3  | 0.32  |
| 273 | -5   | -5   | -5.2 | -4.8 | -4.7 | -4.4 | -4.7 | -5   | -5.7 | -5.1 | -4.5 | -4.6 | -5.1 | -5.4 | -5.2 | 4.8  | -4.9 | -4.6 | -5.2 | -4.7 | -3.4 | -5.6 | -4.8 | -5.3 | -5.4 | -4.7 | -5.5 | -4.9 | -4.9 | -5.3  | 0.44  |
| 274 | -5.4 | -4.5 | -5.2 | -5.1 | -5.3 | -4.7 | -4.1 | -4.9 | -5.9 | -5.2 | -4.9 | -4.3 | -4.6 | -5.2 | -5.3 | -4.7 | -4.6 | -4.4 | -5.1 | -5   | -3.6 | -5.9 | -5.5 | -5.2 | -5.4 | -5.5 | -5.4 | -5.4 | -5.5 | -5.3  | 0.52  |
| 275 | -5.7 | -5.6 | -5   | -4.5 | -5.4 | -5.1 | -4.5 | -5.2 | -4.7 | -5   | -4.6 | -4.3 | -4.6 | -5.6 | -4.8 | -5.1 | -5   | -4.9 | -5.3 | -5   | -2.4 | -6.4 | -5.4 | -5.5 | -5.5 | -5.3 | -5.4 | -5.7 | -5.7 | -5.7  | 0.69  |
| 276 | -5.1 | -4.3 | -3.8 | -4.7 | -5.1 | -5.2 | -4.8 | -3.7 | -6.5 | -4   | -4   | -4.6 | -4.5 | -4.4 | -3.9 | -4.1 | -4.6 | -5   | -4.9 | -2   | -7   | -6   | -6.1 | -6.1 | -5.5 | -5.9 | -6.3 | -5.8 | -6.6 | -5    | 1.02  |
| 277 | -3.8 | -3.6 | -4.2 | -4   | -3.9 | -3.8 | -3.8 | -3.8 | -4.6 | -4.1 | -3.7 | -4   | -3.9 | -4.3 | -3.9 | -3.7 | -3.9 | -3.8 | -3.7 | -4   | -3.3 | -4.5 | -4   | -4.3 | -4.2 | -3.9 | -4.1 | -4   | -3.8 | -4    | 0.26  |
| 278 | -6.4 | -5   | -2.5 | -1.9 | -6.4 | -5.9 | -4.2 | -4.8 | -5.9 | 1.4  | -5.9 | 4    | -5   | -3.5 | -6   | -2.5 | -4.2 | -6.2 | -6.4 | -6   | 5.5  | -4.4 | -6   | -5.9 | -6.9 | -6.4 | -7.1 | -6.5 | -6.7 | -6.4  | 3.11  |
| 279 | -6.6 | -5.4 | -5   | -4.6 | -6.2 | -5.8 | -4.6 | -5.9 | -5.5 | -3.3 | -5.1 | -4.1 | -4.4 | -4.9 | -5.5 | -5.4 | -4.9 | -5.4 | -6.1 | -6   | -0.3 | -6.3 | -6.8 | -5.5 | -6.1 | -6.5 | -6.4 | -6.6 | -6.7 | -6.5  | 1.29  |
| 280 | -4.2 | -3.7 | -4.1 | -4.2 | -3.8 | -4.2 | -3.9 | -3.7 | -4.4 | -3.8 | -4.3 | -4.1 | -3.8 | -3.7 | -3.6 | -3.8 | -3.5 | -4.1 | -3.8 | -4.3 | -4.5 | -3.6 | -4.6 | -3.7 | -3.5 | -3.6 | -3.7 | -3.6 | -3.7 | -0.31 |       |
| 281 | -5.2 | -5.1 | -4.7 | -4.6 | -5   | -4.6 | -4   | -5.5 | -4.8 | -4.7 | -4.6 | -4.5 | -4.6 | -5.2 | -5   | -4.9 | -4.8 | -4.7 | -5.1 | -4.6 | -2.9 | -5.6 | -4.7 | -5.3 | -5.1 | -4.9 | -5.3 | -5   | -5.2 | -5.2  | 0.50  |
| 282 | -5.8 | -5.3 | -5.2 | -5.4 | -5.9 | -5.4 | -5.2 | -5.6 | -6   | -5.6 | -4.9 | -5.2 | -4.9 | -5.7 | -5.5 | -5.3 | -5.1 | -5.4 | -5.9 | -5.7 | -4.2 | -7.1 | -5.7 | -6   | -5.8 | -5.9 | -5.6 | -6.2 | -5.8 | -5.8  | 1.84  |
| 283 | -5.1 | -4.2 | -4.3 | -4.3 | -4.8 | -4.4 | -4.5 | -4.4 | -5.4 | -4.3 | -4.7 | -4.4 | -4.5 | -4.6 | -4.5 | -3.9 | -4.3 | -4.7 | -4.8 | -4.7 | -1.6 | -5.7 | -4.9 | -4.9 | -5.3 | -5   | -5.4 | -5.2 | -5.2 | -5.3  | 0.72  |
| 284 | -6.3 | -5.3 | -5.6 | -4.7 | -5.8 | -6.3 | -5.3 | -5.4 | -6   | -5.5 | -5.4 | -5.1 | -5.1 | -5.5 | -6   | -4.6 | -5.3 | -5.3 | -6.3 | -5.9 | -2.5 | -5.6 | -5.7 | -6.4 | -6.3 | -6.5 | -6.1 | -6.4 | -6.3 | -6.4  | 0.79  |
| 285 | 38.5 | 38.3 | 58.9 | 79.9 | 33.3 | 43.4 | 45.3 | 37.7 | 39.2 | 72.6 | 40.7 | 86   | 43.1 | 55.9 | 42   | 53.2 | 26.2 | 53.7 | 40.3 | 47.4 | 54.8 | 21.1 | 2.9  | 25.5 | 1.6  | -0.4 | 7    | 1.5  | 0.8  | -1.7  | 24.07 |
| 286 | -4.7 | -3.8 | -3.2 | -2.1 | -5   | -5.1 | -4.2 | -3.8 | -5.1 | -4.4 | -4.5 | -2.1 | -4.5 | -4.6 | -4.7 | -3.1 | -4.5 | -4.9 | -5.2 | -4.6 | -2.7 | -4.3 | -5.1 | -4.7 | -5   | -5   | -4.9 | -5   | -4.8 | -4.8  | 1.53  |
| 287 | -5.5 | -4.6 | -4.9 | -4.5 | -4.5 | -5.2 | -4.4 | -4.5 | -5.2 | -5.1 | -4.4 | -4.3 | -4.5 | -4.9 | -4.9 | -4.7 | -4.2 | -4.4 | -4.9 | -4.3 | -4   | -5   | -5   | -5   | -5.1 | -5.3 | -5.1 | -5.4 | -5.5 | -5.3  | 0.41  |
| 288 | -4.8 | -4.4 | -4.5 | -4.3 | -4.4 | -4.8 | -3.9 | -5   | -4.2 | -4.4 | -4.4 | -3.9 | -4.1 | -4.7 | -4.6 | -4.4 | -4.4 | -4.2 | -4.6 | -4.1 | -4.6 | -5.2 | -4.5 | -4.8 | -5   | -4.5 | -5   | -4.7 | -4.6 | -4.9  | 0.33  |
| 289 | -4.2 | -3.8 | -4.5 | -4.4 | -4.1 | -4.4 | -3.9 | -4.1 | -4.4 | -4.4 | -4   | -4.5 | -4.1 | -4.4 | -4.3 | -4   | -4.4 | -4   | -4.1 | -3.9 | -4.3 | -4.2 | -4.1 | -4.6 | -4.5 | -4.1 | -4.1 | -4.1 | -4.3 | -4.3  | 0.21  |
| 290 | -4.8 | -4.3 | -4.8 | -4.4 | -4.5 | -5.1 | -4.3 | -4.4 | -4.8 | -4.6 | -4.9 | -4.3 | -4.7 | -4.7 | -4.9 | -4.6 | -4   | -4.2 | -4.7 | -4.7 | -2   | -6.1 | -5.7 | -4.9 | -5.3 | -5.4 | -5.1 | -5.5 | -5.3 | -5.4  | 0.71  |
| 291 | -5.4 | -3.6 | -3.4 | -0.5 | -5.2 | -4.1 | -4.2 | -4.7 | -5.1 | -4   | -4.4 | 0.8  | -4.2 | -4.1 | -4.8 | 2.9  | -4.1 | -4.3 | -5.7 | -5.3 | 8.6  | -3.9 | -5.7 | -5   | -5.4 | -5.6 | -5.6 | -5.4 | -5.6 | -5.5  | 2.70  |
| 292 | -4.7 | -4.4 | -4.4 | -4.3 | -4.5 | -4.7 | -4   | -4.7 | -4.8 | -4.4 | -4.6 | -4.8 | -4.1 | -4.6 | -4.6 | -4.4 | -4.4 | -4.6 | -4.4 | -4.2 | -4.1 | -5.1 | -4.6 | -4.7 | -4.7 | -4.3 | -4.7 | -4.5 | -4.6 | -4.7  | 0.24  |
| 293 | -5   | -4.9 | -4.6 | -4.3 | -4.4 | -4.6 | -4.2 | -5.5 | -5.7 | -5.1 | -4.7 | -5   | -5.1 | -5.6 | -5.5 | -5.1 | -4.9 | -5.2 | -5.6 | -5.1 | -2.6 | -5.7 | -5   | -5.2 | -5.5 | -5   | -5.5 | -5   | -5   | -5.5  | 0.61  |
| 294 | -5.6 | -5   | -4.5 | -4.7 | -5.3 | -4.6 | -5   | -5.4 | -5.1 | -4.8 | -5.5 | -4.6 | -5.6 | -5.5 | -4.9 | -5   | -5.1 | -5.2 | -5.5 | -5.1 | -4.6 | -5.6 | -5.8 | -5.6 | -4.9 | -5.3 | -5.5 | -5.3 | -5.5 | -5.7  | 0.38  |
| 295 | -4.2 | -3.7 | -4.2 | -4.2 | -3.9 | -4.1 | -3.8 | -3.9 | -5.1 | -3.9 | -4.1 | -4.2 | -3.9 | -4.1 | -4.1 | -3.6 | -3.9 | -4.1 | -3.9 | -3.8 | -4   | -4.3 | -4.1 | -4.5 | -4.5 | -4.1 | -4.4 | -4.1 | -4.2 | -4.3  | 0.29  |
| 296 | -5.5 | -4.8 | -4.7 | -4.9 | -5.2 | -5   | -4.5 | -5.2 | -5.8 | -5.4 | -4.9 | -5.1 | -5.4 | -5.5 | -4.9 | -5.2 | -5.2 | -4.5 | -5.6 | -5.5 | -4   | -6.2 | -5.5 | -5.1 | -5.9 | -5.3 | -5.6 | -5.6 | -5.4 | -5.6  | 0.46  |
| 297 | -5.7 | -1.9 | -0.3 | 0.6  | -5.4 | 4.4  | 1.6  | -5.4 | -1.1 | -4.9 | 2.2  | -4.2 | -3.1 | -4.8 | 2.6  | -4.6 | -5.9 | -5.2 | -5.8 | 10.2 | -5.3 | -6.9 | -5.9 | -6.3 | -6.9 | -6.2 | -6.5 | -6.7 | -6.6 | -3.84 |       |
| 298 | -4.9 | -4.8 | -4.3 | -4.4 | -4.8 | -4.5 | -4.5 | -4.7 | -4.5 | -4.9 | -4.4 | -4.1 | -4.4 | -4.8 | -4.5 | -4.7 | -4.1 | -4.5 | -4.6 | -4.6 | -4.3 | -5.4 | -5.2 | -4.7 | -4.8 | -5   | -4.7 | -4.8 | -4.9 | -4.8  | 0.29  |
| 299 | -5.4 | -5.1 | -5   | -4.5 | -5.5 | -5.2 | -4.9 | -5.2 | -5.8 | -5.2 | -4.9 | -4.4 | -4.7 | -5.5 | -4.9 | -4.9 | -4.5 | -5.1 | -5.8 | -6.2 | -1.4 | -5.6 | -5.9 | -5.9 | -5.7 | -5.7 | -5.8 | -5.7 | -5.7 | -5.7  | 0.86  |
| 300 | -4.4 | -4.1 | -4.4 | -5.7 | -4.9 | -4.7 | -4   | -4.2 | -5   | -4.3 | -4.8 | -4.1 | -4.6 | -5.1 | -4.6 | -3.7 | -4.3 | -4.7 | -4.8 | -4.7 | -0.7 | -5.7 | -5   | -4.6 | -5   | -4.9 | -5   | -4.9 | -5   | -5.2  | 0.86  |
| 301 | -5.1 | -5.3 | -4.5 | -4.2 | -4.8 | -4.8 | -4.5 | -5   | -5.4 | -4.4 | -5.3 | -4.6 | -5   | -5.6 | -5.2 | -5.1 | -4.6 | -4.9 | -5.3 | -5.2 | -0.2 | -5.6 | -6   | -5.7 | -5.8 | -5.7 | -5.8 | -5.6 | -5.7 | -5.5  | 1.03  |
| 302 | -3.6 | -3.4 | -3.9 | -3.6 | -3.4 | -3.6 | -3.6 | -3.7 | -4.5 | -3.6 | -3.8 | -4   | -4   | -3.9 | -3.6 | -3.8 | -3.4 | -3.5 | -3.9 | -3.3 | -3.3 | -4.7 | -3.4 | -4.2 | -3.6 | -3.3 | -3.5 | -3.7 | -3.4 | -3.6  | 0.34  |
| 303 | -6.5 | -6.6 | -5.5 | -5.1 | -6.4 | -6   | -5.4 | -6.7 | -6.7 | -5.5 | -6   | -5.9 | -5.5 | -6.6 | -6.7 | -6.4 | -6.1 | -5.5 | -6.7 | -5.8 | -2.3 | -6.9 | -6.6 | -7.6 | -6.8 | -6.6 | -6.8 | -7.1 | -6.7 | -6.9  | 1.68  |
| 304 | -6.4 | -4.7 | -4.6 | -4.4 | -5.8 | -5.2 | -5.4 | -5.4 | -7.2 | -4.9 | -5.3 | -3.3 | -5.2 | -5.5 | -5.2 | -4.3 | -4.5 | -5.6 | -5.7 | -5.8 | 6.7  | -5   | -5.5 | -5.4 | -6.5 | -5.8 | -6   | -6.1 | -6.3 | -6.3  | 2.35  |
| 305 | -6.5 | -4.3 | -4   | -3.5 | -6.2 | -5.4 | -4.7 | -4.4 | -6.2 | 1    | -4.9 | 0.1  | -6.3 | -3.9 | -4.9 | -3.4 | -5.2 | -6   | -5.6 | -5.7 | 9.9  | -5.1 | -6.2 | -5.4 | -6.8 | -6   | -6.7 | -6.5 | -6.5 | -6.5  | 3.27  |
| 306 | -4.4 | -4.4 | -2.3 | -3.4 | -4.4 | -5.3 | -4.2 | -4.6 | -5.7 | -3.4 | -4.4 | 2.1  | -3.6 | -4.9 | -4.2 | -2.9 | -4.2 | -4.6 | -6.1 | -5.7 | 8.6  | -5.1 | -6.1 | -6.2 | -5   | -5.7 | -5.9 | -6.7 | -5.8 | -6.8  | 2.94  |
| 307 | 10.7 | 17.5 | 37.3 | 57.2 | 31.7 | 14.5 | 39.3 | 30.1 | 14.4 | 55.6 | 39   | 87.3 | 33.1 | 52   | 25.1 | 56.1 | 20.9 | 11.6 | 11.8 | 35.5 | 52.7 | 28.5 | -4.2 | 5.4  | -3.6 | -5.8 | -1.7 | -3.1 | -2.4 | -0.5  | 23.41 |
| 308 | -5.8 | -5.4 | -5.4 | -5.9 | -5.8 | -5.6 | -5.5 | -5.2 | -6   | -5.2 | -5.4 | -5.4 | -5.7 | -5.7 | -5.9 | -4.8 | -5.2 | -5.4 | -5.9 | -5.7 | -2.6 | -6.3 | -6.1 | -5.6 | -6.1 | -5.6 | -5.9 | -5.8 | -5.8 | -5.9  | 0.64  |
| 309 | -5.6 | -6.1 | -5.1 | -5.5 | -5.3 | -5.3 | -4.9 | -6.3 | -5.9 | -5.2 | -5.9 | -5.5 | -4.9 | -5.7 | -5.7 | -5.9 | -5.2 | -5.8 | -5.9 | -5.4 | -0.2 | -7   | -6.6 | -6.2 | -5.9 | -6.3 | -5.7 | -6.2 | -5.9 | -6    | 1.12  |
| 310 | -5.4 | -4.4 | -5   | -5.3 | -5.2 | -5.1 | -4.9 | -4.6 | -6.2 | -4.8 | -5.2 | -5.1 | -5.1 | -5   | -4.6 | -5.4 | -4.8 | -5.4 | -5.3 | -5   | -5   | -5.5 | -6.1 | -5.2 | -5.8 | -5.2 | -5.6 | -5.5 | -5.3 | -5.6  | 0.41  |
| 311 | -4.5 | -4.3 | -3.4 | -3.1 | -4.9 | -4.5 | -4.3 | -4.3 | -5.4 | -3.4 | -4.9 | -3.4 | -4   | -5.6 | -4.6 | -4   | -4.3 | -5.2 | -5.2 | -5.3 | -1.5 | -5.4 | -6.1 | -5.4 | -5.1 | -5.5 | -5   | -5.5 | -5.2 | -5.3  | 0.96  |
| 312 | -5.4 | -4.5 | 0    | -3.6 | -4.6 | -4.8 | -3.6 | -3.4 | -6   | -2.1 | -4.2 | 2.6  | -4.7 | -3   | -3.9 | 2.3  | -4.1 | -4.9 | -5.7 | -5.6 | 9.9  | -4.8 | -6.1 | -5.4 | -6.1 | -6.3 | -6.6 | -6.5 | -6.5 | -6.4  | 3.49  |
|     |      |      |      |      |      |      |      |      |      |      |      |      |      |      |      |      |      |      |      |      |      |      |      |      |      |      |      |      |      |       |       |

|     |      |      |      |      |      |      |      |      |      |      |      |      |      |      |      |      |      |      |      |      |      |      |      |      |      |      |      |      |      |       |      |
|-----|------|------|------|------|------|------|------|------|------|------|------|------|------|------|------|------|------|------|------|------|------|------|------|------|------|------|------|------|------|-------|------|
| 354 | -6.6 | -4.3 | -3.1 | -2   | -6.2 | -6.3 | -4.3 | -1.9 | -7.2 | -1.9 | -5.8 | 0.3  | -5.3 | -2.9 | -5.5 | -1.2 | -3.6 | -6.2 | -6.7 | -6.3 | 5    | -5   | -7.6 | -4.6 | -6.7 | -6.9 | -6.8 | -6.3 | -6.8 | -5.8  | 2.74 |
| 355 | -5.8 | -5.5 | -4.7 | -4.4 | -4.9 | -4.6 | -4.7 | -5.6 | -5   | -5.4 | -4.8 | -4.3 | -4.3 | -5.9 | -5.5 | -5.5 | -4.7 | -5.1 | -5   | -4.7 | -4   | -6   | -6.3 | -6   | -5.2 | -5.6 | -5.3 | -5.9 | -5.8 | -5.3  | 0.59 |
| 356 | -6.7 | -4.8 | -4.6 | -4.6 | -5.7 | -6.1 | -4.9 | -4.5 | -7.2 | -4.2 | -6.2 | -5   | -6.2 | -6   | -5.9 | -4.1 | -5   | -5.7 | -6.6 | -5.6 | -4.4 | -6.4 | -7.3 | -6.5 | -7.1 | -6.4 | -6.4 | -7.2 | -6.6 | -6.9  | 0.99 |
| 357 | -5.8 | -4.7 | -4.9 | -4.2 | -5.5 | -5   | -4.6 | -5.4 | -6.2 | -3.8 | -5.4 | -2.6 | -4.9 | -5.1 | -5.2 | -4.9 | -5.2 | -5.2 | -6.1 | -5.3 | -3.8 | -5.7 | -7   | -6.1 | -6   | -5.9 | -6.1 | -6.4 | -6.3 | -6.3  | 0.92 |
| 358 | -5.3 | -4.9 | -4.3 | -4.6 | -5.1 | -5.2 | -4.4 | -5.1 | -6.3 | -4.6 | -5   | -2.8 | -4.2 | -4.6 | -5.1 | -4.8 | -4.6 | -4.9 | -5.3 | -5.2 | -1.3 | -5.6 | -6.9 | -5.7 | -5.5 | -5.4 | -5.6 | -5.6 | -5.5 | -5.5  | 1.00 |
| 359 | -4.5 | -3.8 | -4.3 | -4.3 | -4.2 | -4.6 | -3.9 | -4.1 | -4.5 | -3.9 | -4.3 | -4.2 | -3.8 | -4.2 | -4.1 | -4.1 | -3.9 | -4.2 | -4.1 | -3.7 | -4   | -4.7 | -3.7 | -5.2 | -4.5 | -4.4 | -4.4 | -4.5 | -4.4 | -4.5  | 0.33 |
| 360 | -4.6 | -3.8 | -4.2 | -4.1 | -4.4 | -4   | -4.1 | -4.1 | -4.4 | -4.1 | -4.3 | -4.6 | -3.9 | -4.7 | -4.4 | -3.8 | -3.8 | -4.5 | -4.1 | -4   | -3.3 | -4.8 | -4.1 | -4.5 | -4.6 | -4.4 | -4.7 | -4.5 | -4.6 | -4.7  | 0.35 |
| 361 | -5.3 | -4.3 | -4.8 | -5.1 | -4.7 | -5.3 | -4.3 | -4.8 | -6   | -4.8 | -4.9 | -4.4 | -5.1 | -5   | -4.8 | -4.2 | -4.4 | -4.8 | -5   | -4.6 | -4.3 | -5.7 | -5.1 | -5.1 | -4.9 | -4.6 | -5   | -4.8 | -4.8 | -4.8  | 0.40 |
| 362 | -4.6 | -4.1 | -4.4 | -5   | -4.4 | -5   | -4.3 | -4.3 | -4.9 | -4.4 | -4.5 | -4.7 | -4.3 | -4.6 | -4.5 | -4.1 | -4.2 | -4.4 | -4.4 | -4.3 | -3.7 | -4.8 | -4.9 | -4.8 | -4.6 | -4.3 | -4.7 | -4.6 | -4.5 | -4.5  | 0.29 |
| 363 | -6.7 | -5.6 | -5.8 | -5.4 | -6.1 | -5.7 | -5.1 | -5.8 | -6.6 | -6.1 | -5.4 | -4.4 | -5.9 | -6.6 | -5.8 | -5.5 | -5.4 | -6.1 | -6.7 | -6.4 | 1.5  | -6.6 | -6.5 | -5.8 | -7.1 | -6.9 | -7   | -6.9 | -7   | -7.1  | 1.55 |
| 364 | -5.8 | -4.4 | -3.1 | -2.8 | -5.4 | -5.1 | -4.8 | -2.6 | -6   | -4.9 | -5.4 | 0.7  | -5.7 | -4.1 | -5.7 | -2.4 | -4.5 | -5.5 | -4.4 | -5.5 | -2.5 | -5.5 | -5.5 | -5   | -6   | -6.1 | -5.7 | -5.9 | -6.2 | -4.6  | 1.41 |
| 365 | -5.7 | -5.8 | -5.1 | -5.2 | -5.6 | -6.1 | -5.4 | -6.1 | -5.6 | -5.7 | -5.6 | -5.3 | -5.6 | -6.2 | -5.6 | -5.6 | -5.6 | -5.4 | -5.8 | -5.7 | -1.9 | -6.5 | -6.2 | -6   | -6   | -5.9 | -5.7 | -5.9 | -5.7 | -5.8  | 0.76 |
| 366 | -3.3 | -3.1 | -3.2 | -3.3 | -2.9 | -3.4 | -3.2 | -3.2 | -3.4 | -3.2 | -3.2 | -3.3 | -3.3 | -3.6 | -3   | -3.2 | -3.1 | -3.1 | -3.1 | -3   | -3.7 | -3.7 | -4   | -3.6 | -3.3 | -3.1 | -3.3 | -3.1 | -3.2 | -3.3  | 0.24 |
| 367 | -4.4 | -3.8 | -3.9 | -3.9 | -4.1 | -4.1 | -3.6 | -3.8 | -4.6 | -3.8 | -4.1 | -3.6 | -4   | -4.3 | -4   | -3.6 | -3.7 | -4.1 | -4.2 | -4.1 | -3.2 | -4.4 | -4.7 | -4.3 | -4.4 | -4.3 | -4.3 | -4.5 | -4.4 | -4.6  | 0.35 |
| 368 | -3.7 | -2.6 | -2.3 | -1.7 | -4.1 | -3   | -0.4 | -3.4 | -3.8 | -0.2 | -3.7 | -1.3 | -1.9 | -3.4 | -3.9 | 4.2  | -3.2 | -3.3 | -3.9 | -3.1 | -1.7 | -4.1 | -5.2 | -3.9 | -4.9 | -4.2 | -4.4 | -4.3 | -4.2 | -4.6  | 1.85 |
| 369 | -5.3 | -4.6 | -4.4 | -4.4 | -5.1 | -5.2 | -5   | -4.4 | -5.6 | -4.3 | -5.5 | -4.1 | -4.8 | -4.8 | -5.1 | -4   | -4.4 | -5.1 | -5.5 | -5   | -2.8 | -5.4 | -4.9 | -5.3 | -5   | -5   | -4.8 | -4.9 | -5.3 | -5.1  | 0.57 |
| 370 | -3.1 | -3.2 | -3.1 | -3.3 | -3.3 | -3   | -3.1 | -3.3 | -3.5 | -3.3 | -3.1 | -3.1 | -3.2 | -2.8 | -3   | -3.1 | -3.2 | -3.3 | -3.1 | -3.1 | -3.5 | -3.1 | -3.4 | -3.4 | -3   | -2.8 | -3   | -2.9 | -3   | -3    | 0.18 |
| 371 | 4    | -3   | -3.5 | -4.1 | -3.8 | -3.6 | -3.6 | -3.4 | -4.6 | -3.6 | -4.1 | -3.7 | -3.8 | -4   | -3.6 | -3.5 | -3.3 | -4   | -3.9 | -3.6 | -4.7 | -4.2 | -4   | -4.3 | -4.2 | -3.6 | -3.7 | -3.9 | -3.8 | -3.8  | 0.36 |
| 372 | -4.7 | -4.4 | -4.6 | -4.7 | -4.5 | -4.1 | -4.4 | -4.5 | -5.1 | -4.9 | -4.9 | -4.7 | -4.7 | -5.4 | -4.5 | -4.4 | -4.4 | -4.3 | -4.7 | -4.6 | -2.9 | -6.1 | -5.1 | -5.2 | -4.8 | -4.4 | -4.7 | -4.7 | -4.5 | -4.9  | 0.51 |
| 373 | -6.6 | -3.6 | 0.5  | -1.7 | -5.1 | -5.2 | -3.2 | -3.7 | -6.2 | -1.9 | -5.2 | 2.7  | -6.2 | -2.3 | -4.7 | -2.9 | -4.2 | -4.8 | -6.1 | -5.4 | 10.2 | -3.4 | -6.5 | -5.5 | -7.2 | -6.5 | -6.9 | -6.6 | -6.7 | -6.8  | 3.55 |
| 374 | -4.3 | -4   | -4.1 | -4.4 | -3.9 | -4.4 | 4    | -4.4 | -4.4 | -4.2 | 4    | -4.2 | -4.3 | -4.3 | -4.2 | -3.9 | -3.7 | -3.8 | 4    | -3.8 | -4.4 | -4.6 | -4.4 | -4.8 | -4.1 | -4.1 | -4.1 | -4.3 | -4.3 | -4.2  | 0.25 |
| 375 | -5.6 | -4.7 | -5.3 | -5   | -5.9 | -5.5 | -4.4 | -5   | -6.2 | -4.8 | -5.2 | -4.7 | -5.4 | -5.6 | -5.3 | -4.8 | -5.4 | -5.5 | -6.1 | -5.5 | -5.3 | -6   | -5.2 | -5.5 | -5.9 | -5.6 | -5.7 | -5.8 | -5.8 | -5.5  | 0.44 |
| 376 | -4.2 | -4.5 | -2.4 | 0    | -3.8 | -5.4 | -4.8 | -4.8 | -5.4 | -4   | -5.1 | -2   | -4.4 | -4.6 | -4.8 | -1.3 | -4.2 | -4.6 | -5.6 | -5.2 | -1.1 | -5.3 | -6.4 | -5.9 | -5.6 | -6   | -5.8 | -5.9 | -6   | -5.8  | 1.61 |
| 377 | -6.1 | -6.3 | -5.5 | -5.7 | -5.7 | -5.5 | -5.4 | -6.5 | -5.7 | -5.7 | -6   | -5.7 | -5.1 | -6.1 | -6.4 | -6.9 | -5.8 | -5.5 | -5.9 | -5.6 | -0.5 | -6.8 | -6.1 | -7.1 | -6.1 | -6.4 | -6   | -6.4 | -6   | -6.2  | 1.11 |
| 378 | -6.5 | -4.8 | -5.5 | -5.1 | -5.7 | -4.6 | -5.8 | -5   | -6   | -5.8 | -5.6 | -3.5 | -5.8 | -6.5 | -5.5 | -4.3 | -5.3 | -5.7 | -6.7 | -6.3 | 3.3  | -5.4 | -6.7 | -5.6 | -7.1 | -6.6 | -7.1 | -6.3 | -6.9 | -6.5  | 1.86 |
| 379 | -5.7 | -5.6 | -6   | -5.5 | -5.4 | -5.3 | -5.6 | -5.7 | -6.1 | -5.4 | -5   | -6   | -5.3 | -6.3 | -5.6 | -5.5 | -5.5 | -5.5 | -5.6 | -5.7 | 2.3  | -5.9 | -5.5 | -6.7 | -6.1 | -6   | -5.8 | -5.9 | -5.9 | -5.8  | 1.50 |
| 380 | -6.2 | -4.7 | -5.1 | -4.9 | -5.4 | -5.3 | -5.3 | -6   | -4.7 | -5.3 | -3   | -5.2 | -5.6 | -5.3 | -4.3 | -4.7 | -5.2 | -5.9 | -5.6 | 6.3  | -6.3 | -7.2 | -5.6 | -6.4 | -6.2 | -6.2 | -6.2 | -6.2 | -6.4 | 2.30  |      |
| 381 | -6.2 | -5.4 | -4.5 | -4.9 | -5.4 | -5.4 | -4.4 | -5.6 | -4.8 | -5.6 | -4.8 | -5.6 | -4.7 | -4.5 | -5.6 | -5   | -5.1 | -4.8 | -5   | -6.2 | -5.3 | -1.2 | -5.8 | -5.7 | -5.6 | -6.4 | -5.5 | -6.6 | -6.3 | -6.2  | 0.98 |
| 382 | -4.8 | -5.1 | -3.8 | -4.1 | -5.7 | -5.2 | -5   | -4.8 | 6    | -2.9 | -5.3 | -3.5 | -4.7 | -5.5 | -5.3 | -2.2 | -4.4 | -5.5 | -5.5 | 0    | -5.7 | -6   | -5.4 | -5.7 | -5.7 | -5.8 | -5.8 | -5.8 | -5.6 | -5.6  | 1.31 |
| 383 | -6.4 | -3.7 | 0.6  | 1.3  | -5.9 | -5.9 | -5.1 | -2   | -7.5 | 2.6  | -6.6 | 2.3  | -5.1 | -3.2 | 6    | 0.9  | -4.1 | -6   | -6.8 | -6.2 | -4.7 | -5.3 | -8   | -5.6 | -6.2 | -7.2 | -7.2 | -7.2 | -7.4 | -7.1  | 3.12 |
| 384 | -5.5 | -5.2 | -4.4 | -5.5 | -4.9 | -5.1 | -4.9 | -5.3 | -4.8 | -4.8 | -5.5 | -4.9 | -4.9 | -5.9 | -4.7 | -5.2 | -4.9 | -5   | -5.8 | -4.9 | -4.3 | -6   | -6.5 | -5.6 | -5.9 | -5.9 | -5.3 | -5.8 | -5.8 | -5.5  | 0.52 |
| 385 | -5.2 | -4.3 | -4.8 | -5   | -5.2 | -5.1 | -4.6 | -4.3 | -5.2 | -5.5 | -4.8 | -5   | -4.6 | -4.1 | -4.9 | -3.8 | -4.2 | -5   | -5.1 | -5.1 | -4.5 | -4.6 | -5.5 | -4.8 | -5.1 | -5.1 | -4.9 | -5   | -5.1 | -4.9  | 0.40 |
| 386 | -5.6 | -5.8 | -5.2 | -4.7 | -5.3 | -4.9 | -4.9 | -6.3 | -5.5 | -5.6 | -4.8 | -5.1 | -4.7 | -5.4 | -5.6 | -5.8 | -5.3 | -4.8 | -5.5 | -5.2 | -2.1 | -6.5 | -6.1 | -6.2 | -5.7 | -5.8 | -5.4 | -6   | -5.8 | -5.9  | 0.79 |
| 387 | -4.9 | -4.1 | -4.2 | -3.8 | -4.2 | -4.3 | -4.5 | -4.3 | -5.2 | -5.1 | -4.3 | -4.2 | -4.3 | -4.6 | -4.4 | -4   | -4   | -4.4 | -4.5 | -4.5 | -3.4 | -5.3 | -4.4 | -4.7 | -4.8 | -4.5 | -4.6 | -4.7 | -4.4 | -4.6  | 0.40 |
| 388 | -5.9 | -5.9 | -5.2 | -5.2 | -6.2 | -5.8 | -4.8 | -5.9 | -5.7 | -5.4 | -5.9 | -5.1 | -4.6 | -6   | -5.5 | -5.9 | -5.1 | -5.5 | -5.7 | -5.5 | -3.8 | -5.9 | -6.1 | -6.6 | -6   | -5.8 | -5.9 | -5.8 | -6.1 | -5.9  | 0.55 |
| 389 | -5.2 | -5.1 | -4.9 | -4.6 | -4.7 | -4.9 | -4.5 | -5.2 | -4.8 | -5.1 | -4.7 | -4.6 | -4.5 | -5.2 | -4.9 | -5.1 | -4.8 | -4.6 | -5   | -4.6 | -4.9 | -5.4 | -5.1 | -5.3 | -5   | -5.2 | -4.8 | -5.2 | -5.2 | -5.2  | 0.26 |
| 390 | -4.7 | -4.8 | -3.3 | -1.8 | -4.6 | -4.8 | -4.1 | -4.3 | -6   | -2.9 | -4.9 | -3.7 | -4.4 | -3.8 | -4.2 | -3.3 | -4.4 | -4.5 | -4.9 | -4.7 | 2.4  | -5.8 | -5.3 | -5.4 | -5.9 | -5.2 | -5.3 | -5.3 | -5.3 | -5.3  | 1.58 |
| 391 | -5.6 | -4.7 | -5.1 | -5.2 | -5.1 | -5.1 | -4.4 | -5.3 | -5.1 | -5.2 | -5   | -4.6 | -4.7 | -5.1 | -5.1 | -4.6 | -5.3 | -4.8 | -5   | -4.5 | -4.8 | -5.8 | -5.1 | -5.3 | -5.3 | -5   | -5.5 | -5.2 | -5.4 | -5.7  | 0.34 |
| 392 | -5.5 | -5.1 | -4.8 | -4.6 | -5.4 | -5.2 | -4.7 | -5.5 | -5.5 | -5   | -5.1 | -4.7 | -4.8 | -5.6 | -5.1 | -4.9 | -5.2 | -4.9 | -5.3 | -5   | -3.3 | -6.2 | -5.7 | -5.2 | -5.2 | -5.4 | -5.3 | -5.7 | -5.4 | -5.4  | 0.50 |
| 393 | -4.4 | -3.9 | -0.4 | -3.2 | 4    | -5.9 | -3.4 | -2.4 | -5.9 | 0.6  | -5.4 | 5.9  | -4.1 | -2.6 | -3.5 | 0.3  | -3.1 | -4.8 | -6.1 | -5.8 | 17.9 | -3.7 | -6.2 | -6   | -6.4 | -6.7 | -6.3 | -6.4 | -6.7 | -6.5  | 4.85 |
| 394 | -5   | -4.4 | -4.4 | -4.9 | -4.3 | -4.8 | -4.6 | -4.4 | -4.6 | -4.5 | -4.5 | -4.2 | -4.3 | -4.6 | -4.4 | -4.4 | -3.9 | -4.3 | -4.4 | -4.3 | -4.3 | -4.8 | -4.6 | -5   | -4.6 | -5.1 | -4.6 | -5.2 | -5.1 | -4.7  | 0.31 |
| 395 | -5.1 | -4.2 | -2.5 | -2.4 | -5.3 | -4.7 | -4.4 | -0.3 | -7   | -2.3 | -5.2 | -3   | -5.6 | 1    | -4.8 | -1   | -4.2 | -5   | -5.8 | -5.2 | -4.5 | -3.9 | -6   | -3.9 | -6.2 | -6.5 | -6.2 | -6.3 | -6.1 | -6.1  | 1.93 |
| 396 | -5.1 | -4.5 | -4.3 | -4.7 | -4.5 | -5   | -4.7 | -5.1 | -5.2 | -4.6 | -4.5 | -4.8 | -4.6 | -5   | -4.7 | -4.5 | -4.2 | -4.6 | -5.1 | -4.4 | -4.5 | -5.5 | -4.9 | -5.4 | -4.6 | -5.1 | -4.6 | -5.4 | -5.2 | -5    | 0.35 |
| 397 | -4.4 | -3.9 | -4.3 | -3.7 | -4.4 | -4.1 | -4.1 | -4   | -4.2 | 4    | -4.3 | -4.2 | -4.2 | -4.6 | -4.3 | -3.7 | -4.1 | -4.5 | -4.2 | -4.5 | -3.7 | -4.9 | -4.9 | -4.8 | -4.4 | -4.2 | -4.4 | -4.4 | -4.3 | -4.5  | 0.31 |
| 398 | -4.9 | -4.5 | -4.5 | -4.6 | -4.4 | -4.6 | -4.7 | -4.7 | -5   | -4.9 | -4.5 | -4.7 | -5.1 | -4.6 | -4.6 | -4.5 | -4.8 | -4.7 | -2.7 | -2.4 | -4.6 | -5.1 | -5   | -4.7 | -5   | -4.8 | -5   | -4.9 | -5   | -4.9  | 0.45 |
| 399 | -3.4 | -3.2 | -3.3 | -3.4 | -3.2 | -3.4 | -3.2 | -3.6 | -3.4 | -3.2 | -3.3 | -3.3 | -3.5 | -3.3 | -3.2 | -3.2 | -3.4 | -3.3 | -2.9 | -3.5 | -3.6 | -3.8 | 4    | -3.3 | -3.2 | -3.4 | -3.3 | -3.3 | -3.3 | -3.5  | 0.20 |
| 400 | -4.9 | -4.9 | -4.4 | -4.5 | -4.6 | -5.9 | 4    | -5   | -6.1 | -3.2 | -5.1 | 1    | -4.6 | -3.8 | -5   | -2.2 | -4.5 | -5.2 | -5.6 | 6    | -4.6 | -5.9 | -6.4 | -6.2 | -5.8 | -6.4 | -5.8 | -6.3 | -6.1 | -2.49 |      |
| 401 | -5.7 | -4.9 | -5   | -4.4 | -5.2 | -5.2 | -4.7 | -5.3 | -6.5 | -3.9 | -6.7 | -4.2 | -5.3 | -5.5 | -4.7 | -4.5 | -4.9 | -4.7 | -5.4 | -4.4 | -2.4 | -5.3 | -7.1 | -5.6 | -5.8 | -5.5 | -5.9 | -5.8 | -5.8 | -6    | 0.90 |
| 402 | -4.7 | -4.5 | -4.8 | -5.5 | -4.5 | -4.4 | -    |      |      |      |      |      |      |      |      |      |      |      |      |      |      |      |      |      |      |      |      |      |      |       |      |

|     |      |      |      |      |      |      |      |      |      |      |      |       |      |      |      |      |      |      |      |      |      |      |      |      |      |      |      |      |      |      |       |      |
|-----|------|------|------|------|------|------|------|------|------|------|------|-------|------|------|------|------|------|------|------|------|------|------|------|------|------|------|------|------|------|------|-------|------|
| 443 | -4.6 | -4.3 | -4.1 | -4.9 | -4.4 | -4.3 | -4.3 | -4.6 | -5.3 | -4.5 | -4.6 | -4.3  | -4.2 | -4.2 | -4.2 | -4.1 | -4   | -4.2 | -4.6 | -4.3 | -3.9 | -5.1 | -4.6 | -4.6 | -4.7 | -4.5 | -4.6 | -4.7 | -4.4 | -4.7 | 0.31  |      |
| 444 | -5.2 | -4.8 | -4.9 | -4.8 | -4.9 | -4.6 | -4.8 | -4.9 | -5.1 | -5   | -5   | -4.9  | -4.7 | -5.2 | -5.1 | -4.5 | -4.9 | -4.7 | -4.6 | -4.6 | -4.7 | -5.1 | -5   | -5.2 | -5.4 | -4.9 | -5.2 | -5.1 | -5.2 | -5.2 | 0.23  |      |
| 445 | -5.6 | -5.1 | -5.1 | -4.8 | -5.4 | -5.1 | -4.8 | -5.4 | -5.4 | -5.4 | -5   | -5.2  | -5   | -5.7 | -5.3 | -5.5 | -5.2 | -5.2 | -5.6 | -5.3 | -4.7 | -6.1 | -5.9 | -5.4 | -5.6 | -5.7 | -5.5 | -5.9 | -5.6 | -5.7 | 0.34  |      |
| 446 | -6.5 | -6.6 | -5.7 | -5.1 | -5.4 | -5.7 | -5.1 | -6.7 | -5.6 | -6.1 | -5.2 | -5.4  | -5.6 | -6.4 | -6   | -6.2 | -5.7 | -5.6 | -6.3 | -5.8 | -5.3 | -6.5 | -6   | -6.4 | -6.5 | -6.4 | -6.4 | -6.8 | -6.6 | -6.8 | 2.13  |      |
| 447 | -4.1 | -4.1 | -4.4 | -4.1 | -4.1 | -4.1 | -4   | -3.9 | -4.2 | -3.7 | -3.7 | -4    | -3.9 | -4.1 | -4.3 | -3.9 | -4.1 | -4.2 | -4.1 | -4.1 | -3.6 | -4.6 | -4.9 | -3.9 | -4.2 | -4.1 | -3.9 | -4.1 | -4   | -4   | 0.25  |      |
| 448 | -5.7 | -4.7 | -4.5 | -4.6 | -5.5 | -5.5 | -5.1 | -4.8 | -5.6 | -4.6 | -5.5 | -4.7  | -4.8 | -5.2 | -4.9 | -4.9 | -4.7 | -5.8 | -5.7 | -5.5 | -4.2 | -5.8 | -6   | -5.3 | -5.3 | -6   | -5.4 | -6.1 | -5.8 | -6   | 0.53  |      |
| 449 | -4.7 | -4.1 | -4.7 | -3.9 | -4.6 | -4.1 | -4.1 | -4.3 | -4.7 | -4.5 | -4.2 | -4.3  | -4.3 | -4.7 | -4.5 | -4.2 | -4.3 | -4.3 | -4.2 | -4.4 | -4.3 | -4.5 | -4.3 | -5.6 | -4.8 | -4.8 | -4.6 | -5   | -4.9 | -4.6 | 0.67  |      |
| 450 | -5.2 | -2.9 | -0.8 | 0.4  | -6.5 | -5.7 | -5   | -0.9 | -6.9 | 2.3  | -6.1 | 4.4   | -4.9 | -0.4 | -6.2 | -0.8 | -3.6 | -6.7 | -7.1 | -6.3 | 2.3  | -1.1 | -6.2 | -4.8 | -6.8 | -7   | -6.7 | -7.4 | -7.1 | -7.3 | 3.40  |      |
| 451 | -6.2 | -5.7 | -5.2 | -5.4 | -5.7 | -5.6 | -5.5 | -6.1 | -5.4 | -5.3 | -5.2 | -5    | -4.4 | -5.4 | -6.2 | -5.4 | -5.4 | -5.5 | -6.2 | -5.7 | -2   | -7   | -6   | -6.7 | -6.1 | -6.2 | -5.9 | -6.7 | -6.1 | -6.2 | 0.88  |      |
| 452 | -6.9 | -3.2 | -3   | 1.3  | -5.5 | -5.8 | -4.6 | -3.2 | -6.1 | 0.8  | -5.6 | 2.9   | -3.9 | -0.3 | -5.4 | 1.1  | -3.4 | -5.5 | -6.7 | -6.5 | 5.3  | -6.4 | -7   | -6.8 | -6.8 | -6.9 | -7.1 | -6.9 | -6.9 | -7   | 3.42  |      |
| 453 | -5.6 | -4.7 | -4   | -2.9 | -5.3 | -5.9 | -5.4 | -4.6 | -5.8 | -3   | -5.5 | -2.7  | -6   | -4.5 | -4.8 | -4.6 | -5.4 | -5.8 | -4.7 | -3.9 | -6   | -5.3 | -6.4 | -6   | -5.9 | -6.4 | -6   | -5.9 | -5.9 | -7   | 1.12  |      |
| 454 | 24.1 | 32.6 | 65.7 | 83   | 52   | 58.8 | 46.3 | 38.6 | 38.7 | 69.7 | 45.6 | 111.2 | 59.9 | 52.7 | 54.1 | 49.4 | 30.1 | 30   | 35.4 | 39.3 | 50.7 | 24.9 | 2.6  | 15.7 | 2.5  | -1.5 | 0.6  | 0.7  | 0.5  | 0.4  | 27.51 |      |
| 455 | -6.4 | -6.5 | -5.5 | -5.7 | -5.9 | -5.5 | -5   | -6.4 | -5.3 | -5.6 | -5.3 | -5.4  | -5.2 | -6.2 | -5.6 | -5.9 | -5.7 | -5.3 | -6   | -5.5 | -1.9 | -7   | -6.4 | -6.8 | -5.9 | -6.8 | -5.8 | -6.8 | -6.5 | -6.3 | 0.92  |      |
| 456 | -4.6 | -4.3 | -4.2 | -3.7 | -4.6 | -4.3 | -3.6 | -4.4 | -5   | -4.1 | -4.9 | -3.7  | -4   | -4.7 | -4.5 | -4.1 | -4.1 | -4.7 | -5   | -4.6 | -2.8 | -5.2 | -5.2 | -4.9 | -5.6 | -5.3 | -4.9 | -5.4 | -5.1 | -5.1 | 0.62  |      |
| 457 | -5.2 | -5.1 | -4.5 | -4.4 | -4.6 | -4.3 | -4.6 | -5.6 | -6.1 | -4.4 | -4.6 | -4.9  | -4.6 | -5.3 | -5.1 | -5.1 | -4.2 | -4.6 | -5.5 | -4.9 | -3.7 | -5.5 | -5.3 | -5.7 | -5.3 | -5.4 | -5   | -4.6 | -5.2 | -5.1 | 0.52  |      |
| 458 | -5.8 | -6.4 | -5   | -5.3 | -5.4 | -5.5 | -5   | -6.5 | -6   | -5   | -6   | -5.3  | -4.8 | -5.6 | -5.8 | -6   | -5.3 | -5.7 | -6.2 | -5.7 | -0.3 | -7.1 | -6.4 | -6.2 | -6.1 | -6.2 | -5.9 | -6.3 | -6.1 | -6.1 | 1.14  |      |
| 460 | -5   | -4.3 | -4.3 | -4.8 | -4.3 | -4.5 | -4.3 | -4.7 | -4.8 | -4.4 | -4.3 | -4.2  | -4.3 | -4.7 | -4.5 | -4.1 | -4.2 | -4.6 | -4.3 | -4.4 | -4.1 | -5.1 | -4.6 | -4.7 | -4.6 | -4.9 | -4.7 | -5   | -5   | -5   | 0.30  |      |
| 461 | -4.6 | -3.8 | -4.1 | -4   | -4.7 | -4.5 | -3.8 | -3.9 | -5.3 | -4.2 | -4.2 | -4    | -4   | -4.3 | -4.3 | -3.6 | -3.6 | -4.7 | -4.5 | -4.3 | -4.3 | -4.8 | -4.6 | -4.7 | -4.6 | -4.4 | -4.7 | -4.7 | -4.6 | -4.7 | 0.40  |      |
| 462 | -6.6 | -5.1 | -5.3 | -5.1 | -5.7 | -5.2 | -5.7 | -5.4 | -6   | -4.9 | -5.4 | -1.3  | -6.2 | -5.4 | -5.5 | -3.3 | -5.1 | -5.6 | -6.4 | -5.6 | 2.5  | -5.6 | -5.8 | -5.5 | -7   | -6.1 | -6.7 | -6.1 | -6.5 | -6.8 | 1.82  |      |
| 463 | -6.1 | -6.1 | -6.1 | -4.9 | -5.7 | -5.7 | -6.1 | -6   | -6.1 | -5.4 | -5.2 | -5.6  | -5.7 | -6.8 | -5.8 | -6.3 | -5.4 | -5.5 | -6.1 | -5.5 | -3.7 | -6.6 | -6   | -6.5 | -6.4 | -6.2 | -5.9 | -6.6 | -6.2 | -6.4 | 1.82  |      |
| 464 | -4.6 | -3.7 | -3.9 | -3.7 | -4.8 | -4.6 | -4.7 | -4   | -5.2 | -4   | -4.9 | -3.9  | -5   | -4.4 | -4.8 | -4.1 | -4.1 | -4.4 | -4.8 | -4.5 | -5   | -4.4 | -4.9 | -4.5 | -4.3 | -4.5 | -4.6 | -4.5 | -4.6 | -4.8 | 0.40  |      |
| 465 | -4.6 | -4.2 | -4.6 | -4.1 | -4.3 | -4.8 | -4.3 | -4.6 | -4.8 | -4.6 | -4.1 | -4.3  | -4.2 | -4.9 | -4.3 | -4.1 | -4.2 | -4.4 | -4.2 | -4.1 | -4.2 | -4.9 | -4.7 | -5   | -4.5 | -4.5 | -4.4 | -4.5 | -4.5 | -4.5 | 0.26  |      |
| 466 | -5.5 | -4.9 | -5.2 | -5   | -5.3 | -5.4 | -4.5 | -5.3 | -5.7 | -5.4 | -5.1 | -5.2  | -5.5 | -5.5 | -5   | -5.3 | -5.3 | -4.5 | -5.7 | -5.6 | -3.1 | -6.1 | -5.7 | -5.6 | -5.9 | -5.4 | -6.1 | -5.6 | -5.7 | -6.2 | 0.59  |      |
| 467 | -6.6 | -5.6 | -6   | -6   | -5.9 | -5.8 | -5.2 | -6.3 | -5.7 | -5.7 | -5.1 | -5.3  | -5.3 | -5.5 | -6.1 | -6.1 | -4.9 | -5.7 | -5.6 | -7.2 | -5.9 | 0.1  | -6.7 | -6.6 | -7.1 | -6.2 | -6.7 | -5.9 | -7.1 | -6.6 | 1.28  |      |
| 468 | -7.2 | -4.8 | -3   | -3.1 | -6.8 | -6.4 | -5.9 | -4.2 | -6.1 | -2.1 | -6.5 | 1.8   | -4.6 | -5   | -6.4 | 0.4  | -4.9 | -6.4 | -6.8 | -6.5 | -2.4 | -4.8 | -6.1 | -5.2 | -7.3 | -6.7 | -7.2 | -6.9 | -7   | -7.3 | 2.27  |      |
| 469 | -4.1 | -3.6 | -3.9 | -4.6 | -4.8 | -4   | -4.3 | -4.1 | -5.2 | -4.2 | -4.8 | -3.9  | -4   | -4.4 | -3.9 | -3.8 | -4   | -4.8 | -4.1 | -4.7 | -4.3 | -4.5 | -4   | -4.8 | -4.4 | -4.3 | -4.7 | -4.4 | -4.4 | -4.3 | 0.37  |      |
| 470 | -5   | -1.5 | 5.4  | 13.3 | 0.3  | -0.1 | 4.9  | 6.9  | 1.3  | 20.3 | 0.3  | 13.1  | 3.3  | 20.3 | 3.7  | 2.5  | -0.4 | -1.8 | 2.8  | 3.4  | 30.8 | 3.1  | -6.6 | -0.7 | -5.7 | -7.1 | -5.9 | -7.4 | -6.6 | -7.4 | 9.13  |      |
| 471 | -4.7 | -3.9 | -4.5 | -3.8 | -4.6 | -4.4 | -4.6 | -4.1 | -5.4 | -3.9 | -4.9 | -4    | -4.1 | -4.4 | -4.1 | -3.9 | -3.8 | -4.7 | -4.8 | -4.6 | -4.7 | -4.4 | -4.6 | -4.3 | -5   | -4.7 | -4.5 | -4.9 | -4.4 | -4.7 | 0.39  |      |
| 472 | -5.1 | -4.1 | -4.6 | -4.2 | -4.5 | -4.3 | -4.2 | -4.9 | -5.7 | -4.4 | -4.4 | -4.5  | -4.4 | -5.1 | -5.7 | -4.2 | -4.4 | -5.5 | -5   | -5.3 | -4   | 4.8  | 5.4  | -5.6 | -5.1 | -5.3 | -5   | -5.7 | -5.1 | -5.8 | 0.56  |      |
| 473 | -5.6 | -3.6 | -3   | -3.3 | -4.6 | -4.2 | -3.4 | -4.7 | -4.6 | -2.9 | -4.6 | -2.4  | -4   | -4.8 | -4.2 | -4.1 | -3.9 | -4.7 | -5   | -4.8 | -4.2 | -6.3 | -6.5 | -5.3 | -5.8 | -5.7 | -5.6 | -5.3 | -5.4 | -5.4 | 1.90  |      |
| 474 | -5.3 | -4.3 | -5.4 | -4.3 | -5.3 | -4.8 | -4.4 | -4   | -5.7 | -4.5 | -5.2 | -5.3  | -4.8 | -4.7 | -4.6 | -4   | -4.2 | -4.9 | -5.1 | -5.1 | -3.3 | -5.5 | -5.5 | -5   | -5.2 | -5.3 | -5.5 | -5.6 | -5.4 | -5.5 | 0.58  |      |
| 475 | -4.5 | -4.4 | -3.8 | -3.8 | -4.2 | -4.5 | -4.1 | -4.6 | -5.7 | -4.2 | -4.8 | -4.1  | -4   | -4.8 | -5.2 | -3.9 | -4.2 | -4.5 | -5.5 | -5   | -0.2 | -5.1 | -5.3 | -4.6 | -4.9 | -5.2 | -5.1 | -5.6 | -5.2 | -5   | 0.98  |      |
| 476 | -5.4 | -5.2 | -5.2 | -5.2 | -5.2 | -4.9 | -5.4 | -5.6 | -5.5 | -5   | -5.1 | -4.9  | -5.1 | -5.7 | -5.4 | -5.1 | -5.3 | -5.1 | -5.4 | -5   | -4.4 | -6.1 | -5.6 | -6.1 | -5.5 | -5.7 | -5.5 | -5.6 | -5.6 | -5.3 | 0.35  |      |
| 477 | -4.5 | -3.6 | -3.9 | -3.9 | -4.7 | -4.5 | -4.3 | -4.4 | -5.3 | -4.3 | -4.7 | -4.3  | -4   | -4.3 | -4.5 | -3.6 | -4   | -4.7 | -4.9 | -4.6 | -4.3 | -4.8 | -4.3 | -5.1 | -5   | -5   | -5.2 | -4.5 | -5.1 | -4.5 | 0.45  |      |
| 478 | -6.2 | -5.7 | -5.3 | -4.6 | -5.8 | -5.5 | -5.5 | -6.1 | -5.8 | -5.8 | -5.4 | -5.3  | -5.2 | -6.3 | -5.7 | -4.8 | -5.8 | -5.9 | -5.6 | -0.8 | -6.9 | -6.1 | -6.9 | -6.1 | -5.9 | -6.1 | -5.9 | -6.2 | -6.2 | -6.1 | 1.31  |      |
| 479 | -6   | -5.2 | -6   | -5.5 | -5.6 | -5.6 | -5.5 | -5.5 | -6.3 | -5.3 | -5.3 | -5.8  | -5.5 | -6.3 | -5.8 | -5.2 | -6   | -5.5 | -6.1 | -5.4 | -3.7 | -6   | -6   | -6   | -6.1 | -6   | -6.2 | -5.7 | -6.1 | -6.1 | 1.76  |      |
| 480 | -5   | -3.9 | -1.6 | -3.7 | -5.1 | -4.5 | -3.6 | -2.5 | -6.2 | -1.7 | -4.8 | -1.4  | -4.1 | -3.8 | -5.1 | -3.9 | -3.9 | -4.7 | -4.7 | -5   | 4.2  | -4.9 | -6.2 | -5.1 | -5.8 | -5.7 | -5.6 | -6.3 | -6   | -5.6 | 2.08  |      |
| 481 | -5.3 | -4.7 | -4.8 | -4.9 | -5.3 | -5.2 | -4.5 | -4.9 | -5.2 | -5.2 | -4.8 | -5    | -4.6 | -4.8 | -4.9 | -4.8 | -4.6 | -5   | -5.1 | -4.6 | -3.7 | -4.7 | -4.9 | -5.4 | -4.9 | -5.6 | -4.9 | -5.5 | -5.4 | -5.2 | 0.37  |      |
| 482 | -5.3 | -4.1 | -4.5 | -4.2 | -4.4 | -4.4 | -4.2 | -4.5 | -5.8 | -4.3 | -5.4 | -4.7  | -4.6 | -4.9 | -5.9 | -4   | -4.4 | -5   | -5.5 | -4.8 | -4.1 | -4.6 | -5   | -5.1 | -5.6 | -5.2 | -5.4 | -4.8 | -5.3 | -5.2 | 0.54  |      |
| 483 | -5.7 | -5.1 | -5   | -4.9 | -5.2 | -5.3 | -5.4 | -5.6 | -5.4 | -5.3 | -5.1 | -4.8  | -5.6 | -5.8 | -5.6 | -4.6 | -4.7 | -5   | -5.4 | -5.3 | -2.3 | -5.4 | -5.3 | -5.3 | -5.5 | -5.7 | -5.6 | -5.7 | -5.6 | -5.7 | 0.64  |      |
| 484 | -5.5 | -4.4 | -4.3 | -4.2 | -4.9 | -4.8 | -4.4 | -4.5 | -5.7 | -4.8 | -5.8 | -4.6  | -4.8 | -4.9 | -4.9 | -4.1 | -4.2 | -4.8 | -5.3 | -5   | -3.3 | -5.6 | -5.4 | -4.7 | -5.4 | -5.6 | -5.6 | -5.4 | -5.5 | -5.6 | 0.60  |      |
| 485 | -3.9 | -3.7 | -4.1 | -4   | -3.9 | -3.9 | -3.7 | -4   | -3.7 | -4.2 | -3.6 | -3.8  | -3.9 | -4.2 | -3.9 | -4   | -4   | -3.8 | -3.9 | -3.8 | -3.4 | -4.1 | -4.1 | -3.9 | -4.1 | -3.7 | -3.7 | -3.8 | -3.8 | -4   | 0.18  |      |
| 486 | -5.3 | -4.3 | -4.7 | -4.8 | -4.8 | -4.6 | -4.6 | -4.8 | -4.8 | -5.1 | -4.7 | -5.1  | -4.9 | -4.9 | -5.1 | -4.8 | -4.4 | -4.7 | -4.6 | -4.5 | -4.6 | -4.4 | -4.9 | -5   | -5.4 | -5.1 | -5.5 | -5.1 | -5.3 | -5.4 | -5.3  | 0.33 |
| 487 | -4.1 | -2.8 | 5.4  | 4.8  | -4.3 | -5.3 | -2.6 | -3.6 | -5.1 | -5   | -5.1 | 14.2  | -3.1 | 6.6  | -4.3 | 7.2  | 0.8  | -4.8 | -6.9 | -5.6 | 23.8 | -4.1 | -6.5 | -6.1 | -6.6 | -6.6 | -6.7 | -6.3 | -6.7 | -6.6 | 7.24  |      |
| 488 | -6   | -4.8 | -4.3 | -5   | -5.5 | -5.1 | -5.5 | -5.2 | -6.7 | -5.8 | -5.7 | -5.5  | -5.8 | -5.7 | -5.5 | -4.4 | -5.3 | -5.7 | -5.8 | -5.5 | -1.9 | -6.3 | -5.8 | -6.1 | -6   | -5.8 | -6.1 | -5.9 | -6.1 | -6.1 | 0.86  |      |
| 489 | -4.8 | -4   | -0.2 | -0.4 | -4.1 | -3.5 | -4.8 | -2.6 | -5.8 | 0.2  | -5   | 5.2   | -3.7 | -1.1 | -4.2 | -0.1 | -5.1 | -5.8 | -7   | 5.4  | 10.6 | -4.4 | -6.3 | -5.2 | -6.4 | -6.1 | -6.6 | -5.7 | -6.1 | -6.1 | 3.79  |      |
| 490 | -5.8 | -5.2 | -5   | -4.3 | -5.1 | -4.9 | -4.9 | -5.3 | -5.4 | -5.1 | -4.9 | -4.7  | -4.8 | -5   | -4.9 | -4.7 | -4.7 | -4.9 | -4.8 | -4.6 | -4.3 | -5.6 | -5   | -5.3 | -5   | -5.9 | -5.2 | -6.1 | -6.2 | -5.9 | 0.49  |      |
| 491 | -6.3 | -5.5 | -5.5 | -5.5 | -6.2 | -6   | -6.1 | -6.4 | -5.2 | -5.6 | -5.2 | -5.6  | -5   | -6.2 | -5.7 | -5.8 | -5.7 | -5.5 | -6.4 | -6.2 | 0.3  | -6.8 | -6.5 | -6.5 | -6.7 | -6.9 | -6.7 | -6.9 | -6.5 | -6.3 | 1.28  |      |
| 492 | -4.8 | -4.5 | -4.5 | -4   | -4.6 | -4.3 |      |      |      |      |      |       |      |      |      |      |      |      |      |      |      |      |      |      |      |      |      |      |      |      |       |      |

|     |      |      |      |      |      |      |      |      |      |      |      |      |      |      |      |      |      |      |      |      |      |      |      |      |      |      |      |      |      |      |       |
|-----|------|------|------|------|------|------|------|------|------|------|------|------|------|------|------|------|------|------|------|------|------|------|------|------|------|------|------|------|------|------|-------|
| 533 | -4.9 | -3.8 | -3.9 | -3   | -5.4 | -5.1 | -4.4 | -4.1 | -6.2 | -3   | -4.3 | -2.8 | -3.6 | -4.9 | -4.5 | -3.6 | -4.8 | -4   | -5.5 | -5.4 | 4.1  | -5.7 | -7   | -5.5 | -5.9 | -6.4 | -6.5 | -6.9 | -6.7 | -6.9 | 2.07  |
| 534 | -5.2 | -4.4 | -4.5 | -3.9 | -4.9 | -4.7 | -4.4 | -4.6 | -5   | -4.6 | -5.3 | -4.3 | -4.6 | -4.9 | -4.7 | -4.7 | -4.5 | -5   | -4.9 | -4.8 | -2.3 | -5.9 | -5.6 | -5.5 | -5.3 | -5.1 | -5.2 | -5.2 | -5.1 | -5.2 | 0.64  |
| 535 | -5.8 | -4.4 | -5   | -4.6 | -4.7 | -5.3 | -4.2 | -5.8 | -6.8 | -4.3 | -5.3 | -4.6 | -4.3 | -5.4 | -5   | -4.2 | -4.8 | -4.7 | -4.6 | -5.3 | -4.4 | -5.7 | -5.6 | -5.3 | -5.3 | -5.9 | -5.7 | -5.8 | -6   | -5.1 | 0.65  |
| 536 | -5.9 | -4   | -4.7 | -4.9 | -5.8 | -5.4 | -4.2 | -5.2 | -6.2 | -5.2 | -5.2 | -4.5 | -5   | -4.8 | -4.8 | -2.9 | -4.2 | -5.8 | -6   | -5.8 | -2   | -6.8 | -6.8 | -5.5 | -6.9 | -6.4 | -6.6 | -6.7 | -6.8 | -6.8 | 1.19  |
| 537 | -4.7 | -3.9 | -3.8 | -3.3 | -4.5 | -4.1 | -3.4 | -3.6 | -4.8 | -3.9 | -4.6 | -3.7 | -3.7 | -4.2 | -4.2 | -3.6 | -4.1 | -4.2 | -4.8 | -3.9 | -3.6 | -4.2 | -4.3 | -4.2 | -4.8 | -4.7 | -4.7 | -4.7 | -4.4 | -4.8 | 0.46  |
| 538 | -6.3 | -5.9 | -5.2 | -5.1 | -6   | -5.8 | -5   | -6.4 | -5.6 | -5.6 | -5.5 | -5   | -4.2 | -5.7 | -5.6 | -4.9 | -5.1 | -5.8 | -6.8 | -6.1 | 0.4  | -7.2 | -6.2 | -6.4 | -6.4 | -6.4 | -6.1 | -6.8 | -6.3 | -6.4 | 1.32  |
| 539 | -6.7 | -3.8 | -5   | -4.9 | -5.5 | -5.7 | -4.6 | -5.3 | -6.8 | -4.3 | -5.7 | -3.4 | -4.8 | -4.8 | -5.2 | -3.8 | -4.4 | -5.8 | -6.6 | -6.1 | -2.8 | -7   | -6.2 | -5.7 | -6.7 | -6.5 | -6.3 | -6.7 | -6.7 | -6.7 | 1.14  |
| 540 | -6.1 | -5.2 | -5   | -3.9 | -5.6 | -5.5 | -5   | -5   | -6.1 | -4.8 | -5.9 | 0.1  | -5.6 | -5.6 | -5.1 | -1.5 | -5.4 | -5.7 | -6.1 | -6.3 | 2.3  | -5.5 | -6.2 | -5.8 | -6   | -6.5 | -6.1 | -6.7 | -6.1 | -6   | 1.97  |
| 541 | -5   | -4.9 | -4.8 | -4.7 | -4.7 | -4.5 | -4.3 | -5.1 | -4.5 | -4.9 | -4.6 | -4.6 | -4.6 | -5.5 | -4.6 | -4.9 | -4.5 | -4.3 | -5   | -4.6 | -1.7 | -5.4 | -5.2 | -5   | -5.1 | -4.9 | -5.1 | -5.2 | -5.2 | -5.2 | 0.66  |
| 542 | -6.7 | -4.2 | -4.7 | -4.7 | -6.3 | -6.5 | -4.8 | -5.5 | -6.7 | -4   | -6.9 | -3.1 | -4.8 | -5   | -6.3 | -3.9 | -6.1 | -5.9 | -7.4 | -5.9 | -3.9 | -5.7 | -6.2 | -5.7 | -7   | -6.5 | -6.4 | -6.6 | -7.1 | -6.9 | 1.14  |
| 543 | -5.2 | -4.4 | -4.4 | -3.9 | -4.8 | -4.4 | -4.5 | -5   | -5   | -4.3 | -5.5 | -4   | -5   | -5.3 | -4.8 | -4.6 | -4.7 | -5   | -5.4 | -5.2 | -4.1 | -6.3 | -5.7 | -5.4 | -5   | -5.2 | -4.7 | -5.2 | -4.9 | -5.3 | 0.53  |
| 544 | -5.6 | -5.5 | -5.4 | -4.8 | -5.5 | -5   | -4.8 | -5.6 | -5.3 | -5.5 | -5.5 | -4.8 | -5   | -5.9 | -5.1 | -5.2 | -5.3 | -5.2 | -5.8 | -5.2 | -3.4 | -6.1 | -5.8 | -5.8 | -5.7 | -5.7 | -5.6 | -5.7 | -5.6 | -5.7 | 0.50  |
| 545 | -5.6 | -5.2 | -5.3 | -5.4 | -5.7 | -5.8 | -5   | -5.7 | -6.1 | -5.1 | -5.8 | -5.4 | -5.2 | -6.6 | -6   | -5.2 | -5.5 | -5.2 | -5.4 | -5.8 | -4   | -6.4 | -5.6 | -6.2 | -6   | -5.5 | -5.7 | -5.7 | -5.4 | -5.7 | 0.48  |
| 546 | -5.3 | -5   | -5.1 | -5   | -5.3 | -5   | -4.6 | -5.6 | -5.4 | -4.8 | -5.2 | -4.8 | -5.3 | -5.5 | -4.9 | -4.8 | -5.4 | -5.1 | -5   | -3.1 | -6.2 | -5   | -5.9 | -5.4 | -5.1 | -5.5 | -5.1 | -5.3 | -5.4 | -5.4 | 0.51  |
| 547 | -3   | -3.3 | -3.3 | -3.2 | -3.1 | -3   | -3   | -3.3 | -3.3 | -3.2 | -3.2 | -3.1 | -3.2 | -2.9 | -3.2 | -3.1 | -3.1 | -2.8 | -2.8 | -2.9 | -3.5 | -3.4 | -3.2 | -3.7 | -2.9 | -3   | -3   | -3   | -3   | -3   | 0.20  |
| 548 | -5.3 | -4.7 | -4.3 | -4.4 | -5.1 | -5   | -4.2 | -4.5 | -5.8 | -4.9 | -5.4 | -4.2 | -4.3 | -5.4 | -5.3 | -4.6 | -4.7 | -5.6 | -5.3 | -5.4 | -3   | -6.1 | -5.9 | -5.6 | -5.5 | -5.6 | -5.3 | -5.6 | -5.5 | -5.4 | 0.66  |
| 549 | -6.4 | -5.3 | -5.4 | -5.2 | -5.8 | -5.6 | -4.8 | -5.6 | -5.7 | -5.3 | -5.4 | -5.1 | -5.1 | -5.7 | -5.2 | -5.3 | -5.2 | -5.2 | -5.9 | -5.6 | -4.6 | -6.5 | -5.8 | -5.8 | -6.3 | -6.1 | -6.1 | -6.5 | -6.2 | -6.6 | 0.52  |
| 550 | -6.3 | -5.2 | -5   | -5.4 | -5.9 | -5.6 | -5.1 | -5.5 | -5.9 | -5.3 | -5.5 | -4.6 | -5.1 | -5.3 | -5.4 | -4.4 | -5.1 | -5.8 | -5.8 | -5.6 | -4.6 | -6.2 | -6.2 | -5.6 | -6.8 | -6   | -6.1 | -5.8 | -6.2 | -6.2 | 0.56  |
| 551 | -2.1 | -0.9 | 8.9  | 12.6 | -3.8 | 5.4  | 2.2  | 5    | -2   | 9    | -3.2 | 0.4  | 1.5  | 4.3  | 0.1  | 6.7  | 4.3  | -3.8 | -4.5 | -0.9 | 14.5 | -1.4 | -6.5 | -3   | -5.6 | -5.9 | -5.3 | -5.9 | -5.7 | -5.2 | 5.82  |
| 552 | 1.2  | 7.4  | 17.6 | 10   | 0.9  | 2.8  | 13.3 | 8.3  | -2.2 | 23.4 | -2.4 | 35.5 | 5.9  | 19.1 | 3.3  | 18.8 | 3    | 2    | -2.1 | 3.9  | 26.7 | -3.5 | -5.3 | -1.7 | -6   | -5.9 | -5.6 | -6.5 | -6.3 | -6   | 11.09 |
| 553 | -5.9 | -4.4 | -3.8 | -3.6 | -5.3 | -4.9 | -5   | -4.9 | -6.4 | -4.6 | -5.1 | -3.9 | -5.1 | -4.5 | -4.9 | -4.1 | -4.5 | -5.4 | -5.6 | -5.2 | -2.4 | -5.7 | -6.6 | -5.9 | -5.9 | -6.1 | -6   | -5.7 | -5.7 | -6   | 0.93  |
| 554 | -5.9 | -5.9 | -5   | -4.8 | -5.6 | -5.3 | -4.9 | -6   | -6.2 | -5.2 | -6   | -4.9 | -4.9 | -5.7 | -5.2 | -5.4 | -5.4 | -6   | -5.9 | -5.7 | -3.3 | -6   | -6.7 | -5.9 | -6   | -5.9 | -6   | -6.1 | -6.1 | -6.2 | 0.65  |
| 555 | -5.8 | -4   | -4.5 | -5.5 | -4.6 | -5.2 | -4.8 | -4.1 | -5.2 | -5.2 | -5.2 | -4.5 | -4.7 | -4.7 | -4.7 | -4.2 | -4   | -4.6 | -4.9 | -4.7 | -4.7 | -5.2 | -5.3 | -5   | -5.2 | -4.7 | -4.8 | -5.1 | -4.7 | -5   | 0.43  |
| 556 | -4.7 | -4   | -3.9 | -3.6 | -4.2 | -4.1 | -4.4 | -4.6 | -4.8 | -3.6 | -4.6 | -4.3 | -4.2 | -4.8 | -4.6 | -4.2 | -4.4 | -4.4 | -4.5 | -4.2 | 5.5  | -4.9 | -5.8 | -4.9 | -5.8 | -4.9 | -4.8 | -5.2 | -5.2 | -5.5 | 1.92  |
| 557 | -5   | -4.1 | -4.4 | -4.6 | -4.4 | -4.2 | -4   | -4.5 | -5   | -4.5 | -4.3 | -4.3 | -4.3 | -4.8 | -4.6 | -4.3 | -4.3 | -4.3 | -4.1 | -4.2 | -3.6 | -5.6 | -4.6 | -5   | -4.9 | -4.6 | -4.8 | -4.6 | -4.9 | -5   | 0.40  |
| 558 | -4.8 | -3.7 | -4.8 | -3.7 | -4.7 | -4.4 | -4.4 | -4.2 | -5.5 | -4.2 | -4.5 | -3.9 | -4.1 | -4.4 | -4.4 | -3.6 | -4.2 | -4.6 | -5.2 | -4.4 | -3.5 | -5.1 | -5.2 | -4.7 | -5.6 | -5.1 | -5.4 | -4.9 | -4.9 | -5   | 0.57  |
| 559 | -5.7 | -5   | -5.3 | -5   | -5.5 | -5.1 | -5.2 | -5.2 | -5.8 | -4.6 | -5   | -5   | -5.6 | -5.3 | -5.2 | -4.6 | -5.1 | -5.1 | -5.3 | -5.5 | -2.5 | -6.6 | -5.7 | -5.8 | -5.2 | -5.6 | -5.3 | -5.6 | -5.7 | -5.1 | 0.65  |
| 560 | -6   | -5.1 | -6.3 | -5.5 | -5.5 | -5.5 | -5.6 | -5.7 | -6.4 | -5.3 | -5.1 | -5.7 | -5.5 | -6.6 | -5.7 | -5.5 | -5.8 | -5.3 | -5.7 | -5.4 | 1    | -6.3 | -5.8 | -6.9 | -6.2 | -5.8 | -6.1 | -6.1 | -6   | -6   | 1.31  |
| 561 | -5.7 | -4.9 | -4.9 | -4.2 | -5.3 | -5.2 | -4.8 | -5.1 | -5.3 | -4.4 | -5.2 | -4.2 | -5   | -4.9 | -5.1 | -4.7 | -4.4 | -5.4 | -5.6 | -5.1 | -5.1 | -6.3 | -6.1 | -5.1 | -5.7 | -5.7 | -5.9 | -6   | -6   | -6.1 | 0.57  |
| 562 | -3.8 | -2.8 | -3.4 | -3.6 | -3.3 | -3.7 | -3.1 | -3   | -3.6 | -3.5 | -3.3 | -3.7 | -3.4 | -3.4 | -3   | -2.9 | -3.5 | -3.3 | -3.4 | -3   | -3.4 | -3.8 | -3.4 | -3.7 | -3.5 | -3.1 | -3.2 | -3.4 | -3.1 | -3.4 | 0.27  |
| 563 | -4.4 | -4   | -2.9 | -2.8 | -4.4 | -4   | -3.3 | -4   | -4.9 | -2.3 | -4.1 | -0.7 | -2.8 | -4.1 | -5.1 | -2   | -4   | -4.9 | -5   | -4.1 | 1.9  | -5.5 | -6.3 | -4.8 | -4.8 | -4.8 | -4.8 | -4.9 | -4.6 | -4.7 | 1.58  |
| 564 | -5.4 | -4.9 | -4.1 | -4   | -4.3 | -4.6 | -3.8 | -5   | -5.5 | -4.6 | -4.7 | -4.6 | -4.4 | -5.2 | -5   | -4.6 | -4.6 | -5.1 | -5.4 | -4.6 | -2.5 | -5.9 | -6   | -5.8 | -5.2 | -5.7 | -5.7 | -6.1 | -5.8 | -6   | 0.79  |
| 565 | -5.6 | -5.3 | -4.6 | -4.9 | -5   | -5   | -4.4 | -5.5 | -4.8 | -4.8 | -4.9 | -3.9 | -4.8 | -5   | -5.5 | -4.8 | -4.8 | -4.9 | -5.4 | -5.1 | -0.9 | -5.8 | -5.5 | -5.4 | -5.7 | -5.2 | -5.5 | -5.2 | -5.7 | -5.7 | 0.89  |
| 566 | 33.1 | 45.2 | 51.6 | 67.5 | 49.7 | 46.4 | 38.4 | 45.6 | 40.7 | 63.1 | 59.8 | 69.2 | 56.4 | 53.5 | 48.9 | 40.4 | 30.2 | 51   | 50   | 61.2 | 68.9 | 29.7 | 2.4  | 4.1  | -2.5 | 1.1  | -1.7 | -0.4 | -0.7 | 4    | 24.36 |
| 567 | -5.3 | -4.7 | -5   | -4.9 | -5.1 | -4.7 | -4.8 | -4.6 | -5.4 | -4.7 | -4.8 | -5   | -4.5 | -5.3 | -4.9 | -4.7 | -4.7 | -4.8 | -4.7 | -4.4 | -3.5 | -5.6 | -4.6 | -5.1 | -5.1 | -5.6 | -5.3 | -5.6 | -5.6 | -5.5 | 0.45  |
| 568 | -6.2 | -5.8 | -5.9 | -5.7 | -5.9 | -5.6 | -5.8 | -6.3 | -6.3 | -5.5 | -5.3 | -6.4 | -5.3 | -6.4 | -5.9 | -6.2 | -5.5 | -5.4 | -5.9 | -5.9 | 1.7  | -6   | -5.9 | -6.9 | -6   | -6.2 | -5.7 | -6.2 | -6.1 | -6.1 | 1.44  |
| 569 | -6.4 | -3.2 | -2.2 | -4.8 | -6.9 | -6.4 | -5.4 | -1.2 | -7.4 | -2.1 | -6.4 | 0.5  | -4.2 | 1.3  | -5.2 | 0.4  | -5.4 | -6.7 | -6.8 | -6.4 | -3   | -4.1 | -6.2 | -4.9 | -6.2 | -6.5 | -6.3 | -6.6 | -6.8 | -6.9 | 3.22  |
| 570 | -6.4 | -5.9 | -5.7 | -5.8 | -5.7 | -6.4 | -5.2 | -6.1 | -6.3 | -5.5 | -5.1 | -6.3 | -5   | -6   | -5.9 | -5.5 | -5.6 | -5.7 | -7   | -6.6 | 0    | -6.9 | -6.2 | -6.5 | -5.9 | -7.5 | -5.7 | -6.9 | -6.9 | -6.4 | 1.26  |
| 571 | -6.3 | -5.8 | -5.2 | -5.2 | -5.5 | -5.3 | -5.5 | -6.2 | -5.5 | -5.6 | -5.4 | -5.7 | -5.9 | -5.9 | -5.4 | -5.8 | -5.2 | -5.5 | -5.9 | -5.6 | -4.4 | -6.7 | -6   | -6.5 | -5.9 | -6.2 | -5.8 | -6.3 | -6.5 | -5.9 | 0.48  |
| 572 | -5.3 | -4.4 | -4.7 | -4.6 | -4.5 | -5   | -4.3 | -4.6 | -5.4 | -5.5 | -5   | -4.7 | -4.7 | -5.2 | -5   | -4.5 | -4.8 | -4.4 | -5   | -4.9 | -2.3 | -5.9 | -5.4 | -5.1 | -5.9 | -5.5 | -5.9 | -5.8 | -5.7 | -5.5 | 0.70  |
| 573 | -5.3 | -4.8 | -4.3 | -4.2 | -5.2 | -5.1 | -4.6 | -5.1 | -5.5 | -4.8 | -5.4 | -4.9 | -5.6 | -5.2 | -5.7 | -4.7 | -5.1 | -4.8 | -5.3 | -4.9 | -3.8 | -5.6 | -6.4 | -5.4 | -5.8 | -5.7 | -5.7 | -5.7 | -5.5 | -5.3 | 0.54  |
| 574 | -3.2 | -3   | -3.6 | -3.4 | -3.2 | -3.4 | -3.3 | -3.3 | -3.7 | -3.3 | -3.3 | -3.4 | -3.3 | -3.6 | -3.3 | -3.1 | -3.4 | -3.1 | -3   | -3.2 | -3.7 | -3.3 | -4   | -3.3 | -3.1 | -3.3 | -3.2 | -3.1 | -3.3 | -3.3 | 0.22  |
| 575 | -3.5 | -3.2 | -3.3 | -3.7 | -3.6 | -3.1 | -3.4 | -3.2 | -3.8 | -3.6 | -3.8 | -3.4 | -3.4 | -3.2 | -3.5 | -3.3 | -2.6 | -3.5 | -3.6 | -3.2 | -3.4 | -3.4 | -3.3 | -3.4 | -3.3 | -3.5 | -3.4 | -3.5 | -3.4 | -3.4 | 0.23  |
| 576 | -5.2 | -5.5 | -5.4 | -5   | -4.9 | -5   | -4.5 | -5.5 | -5.1 | -5.1 | -5   | -5   | -5.1 | -5.6 | -5.2 | -5.3 | -5.2 | -4.7 | -5.3 | -5   | -2.8 | -6   | -5.3 | -5.8 | -5.5 | -5.3 | -5.6 | -5.5 | -5.4 | -5.3 | 0.54  |
| 577 | -4.7 | -3.6 | -3.7 | -3.3 | -4.3 | -4.3 | -4.5 | -4.1 | -5.1 | -3.9 | -4.2 | -3.8 | -4.5 | -4.5 | -4.5 | -3.7 | -3.9 | -5.5 | -4.6 | -3.4 | -5   | -5.4 | -4.3 | -4.9 | -5   | -4.7 | -4.9 | -4.7 | -4.9 | -4.7 | 0.49  |
| 578 | -5.3 | -4.6 | -4.7 | -4.6 | -5   | -4.6 | -4.8 | -5.1 | -6.1 | -4.4 | -4.9 | -4.9 | -4.7 | -5.2 | -5   | -4.4 | -4.3 | -5.2 | -5.2 | -4.6 | -3.7 | -4.8 | -4.9 | -5.2 | -5   | -5.3 | -5.1 | -5.2 | -5.2 | -5.1 | 0.42  |
| 579 | -4.7 | -4.7 | -4.6 | -4.5 | -5.6 | -5.4 | -4.6 | -4.4 | -6.4 | -4.9 | -5.8 | -4.8 | -4.7 | -5.2 | -5.3 | -4.4 | -4.6 | -5.5 | -6.1 | -5.6 | -4   | -5.3 | -5.3 | -5.2 | -5.1 | -5.7 | -5.8 | -5.8 | -5.4 | -5.1 | 0.57  |
| 580 | -4.4 | -3.9 | -3.8 | -4.2 | -4.3 | -4.7 | -4.1 | -3.7 | -5   | -3.9 | -4.1 | -3.6 | -3.7 | -4.3 | -4.1 | -3.9 | -3.9 | -4.3 | -5   | -4.4 | -1.7 | -4.9 | -5.4 | -4.5 | -4.9 | -4.9 | -4.8 | -5   | -4.9 | -5.4 | 0.71  |
| 581 | -4.9 | -4   | -4   | -4   | -5.1 | -4.7 | -4.8 | -4.2 | -5.3 | -4   | -5.1 | -4.2 |      |      |      |      |      |      |      |      |      |      |      |      |      |      |      |      |      |      |       |

|     |      |      |      |      |      |      |      |      |      |      |      |      |      |      |      |      |      |      |      |      |      |      |      |      |      |      |      |      |      |       |       |
|-----|------|------|------|------|------|------|------|------|------|------|------|------|------|------|------|------|------|------|------|------|------|------|------|------|------|------|------|------|------|-------|-------|
| 622 | -5.2 | -4.6 | -4.7 | -4   | -4.2 | -4.1 | -4.7 | -4.5 | -4.7 | -4.9 | -4.4 | -2.5 | -5   | -4.9 | -4.8 | -5.1 | -4.9 | -4.8 | -5   | -4.6 | -2.6 | -4.8 | -6   | -5.2 | -5.5 | -5.5 | -5.6 | -5.6 | -5.7 | -5.6  | 0.78  |
| 623 | -4.8 | -3.9 | -4.8 | -5   | -4.3 | -4   | -4.3 | -4.3 | -5   | -5.2 | -4.8 | -4.2 | -4   | -4.2 | -4.3 | -3.9 | -3.9 | -4.3 | -4.5 | -4.4 | -3   | -4.9 | -4.2 | -5.4 | -4.6 | -4.7 | -4.9 | -4.5 | -4.4 | -4.7  | 0.48  |
| 624 | -6.3 | -5.7 | -5.3 | -5.1 | -6.2 | -5.8 | -4.9 | -5.9 | -5.2 | -5.3 | -5.8 | -5.2 | -5.4 | -6   | -5.5 | -5.6 | -5.2 | -5.7 | -6.1 | -5   | -5.2 | -5.8 | -5.9 | -6.4 | -6.2 | -5.8 | -5.6 | -5.6 | -6.1 | -6.5  | 0.43  |
| 625 | -5.9 | -4.8 | -5   | -5.2 | -5.5 | -5.5 | -5.5 | -4.8 | -6.4 | -4.8 | -5.3 | -5.1 | -5.1 | -5.3 | -5.1 | -4.6 | -4.7 | -5.6 | -5.8 | -5.3 | -3.8 | -5.9 | -6.1 | -5.5 | -6.4 | -5.7 | -5.9 | -5.9 | -5.8 | -6.2  | 0.58  |
| 626 | -5.7 | -3.6 | -3.1 | -2.7 | -5.5 | -5.4 | -4   | -4.2 | -6.2 | -1.3 | -5.2 | -0.4 | -5.4 | -3.4 | -4.9 | -3.6 | -4.1 | -5.3 | -5.9 | -5.6 | -3.2 | -4.9 | -6.7 | -5.3 | -5.9 | -5.9 | -6   | -5.9 | -5.7 | -5.9  | 1.49  |
| 627 | -5.4 | -4.5 | -2.5 | -2.5 | -5.2 | -5   | -4.9 | -3.9 | -5.6 | -2.9 | -5.1 | -1.7 | -4.8 | -4.4 | -5.8 | -1.7 | -4.1 | -5.5 | -5   | -5.2 | -0.7 | -5.9 | -6.9 | -5.5 | -5.8 | -5.3 | -5.6 | -5.5 | -5.6 | -5.5  | 1.48  |
| 628 | -6.7 | -4.7 | -3.5 | -1.8 | -6.5 | -5.9 | -5.4 | -4.9 | -5   | -3.2 | -5.6 | -3.2 | -4.2 | -5.3 | -4.4 | -3.7 | -5.6 | -5.7 | -5   | -5.8 | -2.2 | -6.3 | -6.5 | -5.6 | -7   | -6.3 | -6.8 | -6.2 | -6.6 | -6.7  | 1.40  |
| 629 | -4.3 | -3.7 | -4.1 | -3.7 | -4.1 | -3.8 | -3.8 | -3.9 | -4.7 | -4.3 | -4.3 | -4.1 | -3.9 | -4.3 | -3.9 | -3.7 | -3.8 | -4.1 | -4.1 | -4   | -3.2 | -4.3 | -4.5 | -4.5 | -4.5 | -3.9 | -4.4 | -4   | -4.1 | -4.4  | 0.32  |
| 630 | -2.9 | -2.9 | -2.8 | -3.1 | -2.9 | -3   | -3   | -3.1 | -3   | -2.9 | -2.9 | -2.9 | -2.9 | -2.8 | -2.6 | -2.9 | -2.7 | -2.9 | -2.9 | -2.6 | -3.2 | -3.2 | -2.5 | -3.2 | -2.8 | -2.6 | -2.6 | -2.6 | -2.6 | -2.8  | 0.20  |
| 631 | -5.9 | -4.6 | -4.1 | -4.3 | -5.6 | -4.9 | -4   | -4.9 | -5.1 | -3.4 | -5.2 | -4.5 | -4.4 | -5.1 | -5.1 | -4.8 | -4.6 | -5.6 | -5.2 | -5.2 | -5.1 | -5.9 | -6.2 | -5.2 | -6.4 | -5.8 | -6.1 | -6.1 | -6   | -6.2  | 2.02  |
| 632 | -4.6 | -4   | -4.3 | -4.3 | -4.4 | -4.5 | -4.1 | -4.3 | -4.9 | -4.1 | -4.7 | -4.3 | -4.2 | -4.5 | -4.5 | -4.2 | -4.3 | -4.4 | -4.4 | -4.1 | -3.3 | -5.4 | -4.4 | -5   | -4.6 | -5.4 | -4.6 | -4.5 | -4.6 | -4.5  | 0.36  |
| 633 | -4.2 | -4.9 | -4.6 | -3.6 | -4   | -3.9 | -4   | -4.3 | -4.4 | -4   | -4.1 | -3.5 | -4.2 | -4.4 | -4.5 | -4.6 | -3.7 | -4.1 | -5.2 | -4.4 | -5.5 | -4.1 | -4.5 | -5.4 | -5.1 | -5.2 | -5.1 | -5.2 | -5.2 | -5    | 1.89  |
| 634 | -5.1 | -4.3 | -3.7 | 0.7  | -4.6 | -4.4 | -4.2 | -4.6 | -4   | -4.2 | -5.2 | -4.1 | -4.6 | -5.2 | -4.4 | -2.6 | -4.7 | -5.3 | -5.2 | -5.2 | -4.6 | -5.5 | -5.7 | -5.8 | -5.6 | -6.4 | -5.8 | -6.5 | -6.2 | -6    | 2.18  |
| 635 | -5.9 | -5   | -4.4 | -4.7 | -5.6 | -5.4 | -5.5 | -5.4 | -6.6 | -4.8 | -5.7 | -4.4 | -5.2 | -5.3 | -5.8 | -4.8 | -4.8 | -5.5 | -6.2 | -5.5 | -3.1 | -5.9 | -6   | -5.5 | -5.9 | -5.8 | -5.9 | -6   | -6   | -6.2  | 0.70  |
| 636 | -4.8 | -4.2 | -4.7 | -4.4 | -4.8 | -4.6 | -5   | -4.5 | -5   | -4.4 | -5.1 | -4.5 | -4.4 | -5.1 | -4.9 | -4.4 | -4.3 | -4.8 | -4.5 | -4.6 | -3.9 | -5.1 | -4.9 | -4.9 | -4.9 | -4.6 | -4.9 | -4.8 | -4.7 | -4.9  | 0.29  |
| 637 | -5.6 | -4.5 | -2.4 | -2.2 | -5.4 | -5.4 | -5.1 | -0.9 | -6.4 | -0.6 | -5.6 | -1.4 | -5.1 | -0.1 | -5.5 | -1.3 | -4.6 | -5.3 | -5.8 | -5.5 | -1.7 | -3.2 | -6   | -4.5 | -6.1 | -5.9 | -5.8 | -6.1 | -6   | -6.2  | 1.99  |
| 638 | -5.2 | -4.6 | -4.2 | -4.4 | -5   | -5.4 | -5.5 | -4.8 | -6.3 | -4.5 | -5.7 | -4.8 | -4.4 | -4.7 | -4.6 | -5   | -5.1 | -5.9 | -5.9 | -5.1 | -3.3 | -5.7 | -5.9 | -5.6 | -5.8 | -5.4 | -5.9 | -5.5 | -5.8 | -5.7  | 0.67  |
| 639 | -4.8 | -5   | -4.4 | -4.3 | -4.6 | -4.4 | -4.4 | -5.1 | -5.1 | -4.8 | -3.9 | -4.5 | -4.1 | -4.7 | -4.6 | -4.9 | -4.5 | -5.1 | -4.8 | -4.6 | -7.6 | -5   | -5.2 | -5.4 | -4.8 | -5.1 | -5.1 | -4.8 | -5.1 | -4.8  | 2.28  |
| 640 | -5.7 | -4.9 | -4   | -3.6 | -5.6 | -5.3 | -4.5 | -4.6 | -6.1 | -4.2 | -5.3 | -3   | -5.2 | -4.6 | -5.7 | -4.1 | -4.2 | -5.6 | -5.8 | -5.2 | -2.1 | -5.5 | -5.7 | -5.4 | -6.1 | -5.5 | -6.1 | -6.2 | -5.5 | -6.1  | 0.99  |
| 641 | -5.9 | -5.5 | -5.4 | -5.2 | -6.2 | -6   | -5   | -5.7 | -5.4 | -5.3 | -6   | -4.5 | -4.7 | -5.5 | -5.9 | -4.4 | -5.1 | -5.9 | -6.3 | -5.6 | -2.5 | -6.1 | -6.5 | -6.5 | -6.3 | -6.1 | -6.4 | -6.1 | -6.2 | -6.1  | 0.82  |
| 642 | -6   | -5.3 | -4.4 | -4.7 | -6.3 | -5.9 | -5.7 | -4.9 | -7.4 | -4.8 | -6.8 | -4.9 | -5.8 | -5.6 | -6.4 | -4.2 | -5.4 | -6.1 | -6.5 | -6   | -2.6 | -6.1 | -6.4 | -6.3 | -7   | -6.4 | -6.5 | -6.7 | -6.8 | -6.8  | 1.01  |
| 643 | -5.6 | -4.9 | -4.5 | -4.9 | -4.5 | -4.8 | -4.4 | -5.6 | -5.9 | -5.1 | -5   | -4.4 | -4.5 | -5.4 | -4.6 | -5.3 | -5   | -5   | -4.8 | -5.2 | -1.5 | -5.7 | -6.2 | -5.6 | -5.8 | -6.2 | -5.7 | -5.4 | -5.6 | -5.5  | 1.33  |
| 644 | -3.1 | -2.9 | -3.3 | -3.2 | -3   | -3.2 | -3.3 | -3   | -3.3 | -3.1 | -3   | -3.3 | -3.1 | -3.4 | -3.1 | -2.8 | -2.8 | -3.1 | -3.1 | -2.9 | -3.5 | -3.1 | -3.1 | -3.6 | -3.3 | -2.9 | -3.1 | -3   | -3   | -3.1  | 0.19  |
| 645 | -5.1 | -3.9 | -3.8 | -4.2 | -4.9 | -4.5 | -4.4 | -4.2 | -5.1 | -4.4 | -4.6 | -4.4 | -4.4 | -4.7 | -4.5 | -3.7 | -3.9 | -4.8 | -4.5 | -4.2 | -4.8 | -4.8 | -4.4 | -5   | -5   | -4.6 | -5   | -5   | -4.8 | -0.39 |       |
| 646 | -4.6 | -3.9 | -4.2 | -4.7 | -4.7 | -4.4 | -4.4 | -4.3 | -4.9 | -4.3 | -4.8 | -4.2 | -4.3 | -4.5 | -4.6 | -3.5 | -3.8 | -4.9 | -4.7 | -4.4 | -4.1 | -4.7 | -4.8 | -4.7 | -5.2 | -5.1 | -5   | -4.8 | -4.9 | -5    | 0.40  |
| 647 | -4.9 | -4.5 | -5.1 | -4.2 | -5.4 | -4.3 | -4.7 | -6   | -5.5 | -5.3 | -5.7 | -2.7 | -4.3 | -5.8 | -5.1 | -5.1 | -4.7 | -5.5 | -5.5 | -5.7 | -2.5 | -6.4 | -6.6 | -6.1 | -6.2 | -6.5 | -6.2 | -7   | -6.6 | -6.6  | 1.07  |
| 648 | -5.6 | -4.7 | -4.2 | -3.2 | -4.8 | -4.8 | -4.2 | -4.7 | -6.2 | -4   | -5.7 | -4.8 | -4.7 | -4.7 | -4.4 | -4   | -4.2 | -5.4 | -5   | -4.7 | -0.8 | -5.4 | -5.5 | -5.1 | -5.6 | -5.3 | -5.3 | -5.8 | -5.6 | -5.5  | 1.00  |
| 649 | -5.2 | -4.8 | -4   | -3.9 | -5   | -5.1 | -4.5 | -5.1 | -5.9 | -5.2 | -5.5 | -4   | -4.2 | -4.8 | -4.9 | -4.4 | -5   | -5.1 | -5.1 | -5.3 | -0.7 | -5.7 | -5.9 | -5.3 | -5.5 | -5.5 | -5.7 | -6.3 | -6.2 | -6    | 1.03  |
| 650 | -5.1 | -5.1 | -4.8 | -4.6 | -4.9 | -5.1 | -4.7 | -5.6 | -5.4 | -5.7 | -5.1 | -5   | -4.7 | -5.6 | -4.9 | -5.2 | -4.9 | -5   | -5.5 | -5.1 | -1.7 | -6.7 | -6.2 | -6   | -5.3 | -5.5 | -5.4 | -5.7 | -5.7 | -5.6  | 0.81  |
| 651 | -5.1 | -4.2 | -4.1 | -4.3 | -5.1 | -4.9 | -5.5 | -4.6 | -5.7 | -4.1 | -5.3 | -4.4 | -5.7 | -5.2 | -4.3 | -3.9 | -4.7 | -5.2 | -5   | -4.5 | -3   | -5.1 | -5.3 | -4.8 | -4.8 | -5.1 | -4.9 | -5.2 | -5.3 | -5.2  | 0.59  |
| 652 | -5.7 | -4.7 | -4.6 | -4.7 | -5.7 | -5.3 | -4.4 | -4.9 | -5.4 | -4.1 | -5.7 | -4.1 | -4.3 | -5   | -4.8 | -4.2 | -4.7 | -5.5 | -6   | -5.9 | -2.9 | -5.5 | -6.2 | -6.2 | -5.7 | -5.6 | -5.5 | -5.7 | -5.7 | -5.5  | 0.76  |
| 653 | -4.8 | -3.6 | -1.9 | -2.9 | -3.9 | -4.2 | -2.5 | -3.8 | -5.7 | -2.5 | -4.8 | -1.4 | -3   | -5.2 | -4.7 | -1.8 | -2.9 | -4   | -4.3 | -4.3 | 1.8  | -5.9 | -6.2 | -4.8 | -5.4 | -5.2 | -6   | -5.5 | -6   | -5.9  | 1.77  |
| 654 | -3.9 | -3.7 | -3.4 | -3.4 | -3.6 | -3.5 | -3.4 | -3.9 | -3.8 | -3.8 | -3.3 | -3.5 | -3.5 | -3.9 | -3.7 | -3.5 | -3.5 | -3.8 | -3.7 | -2.5 | -4.2 | -3.7 | -4.5 | -3.9 | -3.9 | -3.9 | -3.9 | -4   | -4   | -4    | 0.35  |
| 655 | -5.2 | -4.4 | -4.6 | -5.3 | -4.8 | -4.3 | -4.6 | -4.9 | -5.7 | -4.4 | -4.7 | -4.9 | -4.5 | -5   | -4.6 | -4.3 | -4.2 | -5   | -4.8 | -5.1 | -3.8 | -5.5 | -4.8 | -5.1 | -5.1 | -4.7 | -5   | -4.9 | -4.8 | -5    | 0.40  |
| 656 | -6   | -5.4 | -4.9 | -4.8 | -5.6 | -5.1 | -5.1 | -5.8 | -5.8 | -5.6 | -5.4 | -5.7 | -4.7 | -5.6 | -6   | -5.4 | -4.7 | -5.3 | -5.7 | -5.4 | -5.4 | -5.8 | -6.1 | -5.8 | -5.8 | -6.4 | -6   | -6.3 | -5.9 | -5.8  | 0.60  |
| 657 | 23.9 | 15.7 | 17.1 | 51.7 | 46.7 | 40.8 | 38.5 | 24   | 18.1 | 24.8 | 44.3 | 50.8 | 45.5 | 56   | 41   | 34.4 | 33.7 | 37.1 | 36.2 | 24.6 | 39.9 | 11.5 | -1.8 | 3.9  | 1.8  | -1.9 | -2.2 | -3.3 | -0.9 | -2.8  | 19.24 |
| 658 | -5.1 | -4.7 | -4.6 | -4.8 | -4.6 | -4.8 | -4.4 | -5.2 | -5.2 | -5   | -4.9 | -4.8 | -4.5 | -5.2 | -5   | -5.1 | -4.7 | -4.7 | -5   | -4.6 | -3.5 | -6   | -5.3 | -5.5 | -5.1 | -5.1 | -5.1 | -5.3 | -5   | -5    | 0.42  |
| 659 | -4.5 | -3.3 | -3.2 | -3   | -4.6 | -2.9 | -5.2 | -4   | -5.3 | -2.3 | -4.1 | -0.1 | -2.5 | -2.5 | -4.5 | -2.9 | -3.4 | -4.4 | -5.4 | -5.5 | 10.4 | -3.9 | -6   | -5   | -5.9 | -5.7 | -6.1 | -5   | -6   | -5.7  | 3.02  |
| 660 | -4.7 | -4.1 | -4.2 | -3.5 | -5.5 | -5.8 | -5.3 | -5   | -5.5 | -3   | -5.2 | 1.1  | -4.8 | -4.4 | -5.1 | -3.1 | -4.3 | -5.2 | -6.1 | -5.4 | 12   | -4.1 | -5.4 | -6.2 | -6   | -6.3 | -5.8 | -6.7 | -5.5 | -6.7  | 3.42  |
| 661 | -4.8 | -4.5 | -4.7 | -4.5 | -5.8 | -5.4 | -4.5 | -4.9 | -5.6 | -4.9 | -5.6 | -4.4 | -4.5 | -5   | -5.2 | -4.8 | -4.3 | -5.3 | -5.9 | -5.2 | -4.2 | -6.1 | -5.6 | -5.6 | -5.3 | -5.4 | -5.6 | -5.1 | -5.4 | -5.3  | 0.51  |
| 662 | -4.9 | -3.9 | -3.8 | -3.6 | -5.2 | -4.7 | -4.7 | -4.1 | -5.5 | -3.6 | -5.1 | -3.9 | -4.9 | -4.7 | -4.4 | -3.5 | -4.4 | -5.1 | -5   | -4.1 | -4.1 | -4.5 | -4.8 | -4.6 | -5   | -5.1 | -4.7 | -5.1 | -5   | -5    | 0.55  |
| 663 | -2.6 | -3   | -3.2 | -3.5 | -3   | -3.2 | -3   | -2.9 | -3.5 | -2.9 | -2.7 | -3.3 | -2.8 | -3.3 | -2.7 | -3.2 | -2.8 | -2.6 | -2.6 | -2.7 | -2.9 | -3.2 | -3   | -3   | -3.3 | -2.6 | -2.8 | -3   | -2.8 | -3    | 0.26  |
| 664 | -5.8 | -5.3 | -5   | -5.7 | -6   | -5.4 | -4.8 | -5.6 | -6.4 | -5.4 | -5.9 | -4.3 | -5.6 | -6   | -4.6 | -5.2 | -5.1 | -5.5 | -5.8 | -5.3 | -4.3 | -6.1 | -6.2 | -5.5 | -6   | -5.4 | -6   | -5.8 | -6   | -6    | 0.54  |
| 665 | -5.7 | -4.6 | -4.4 | -3.9 | -5.6 | -6.1 | -5.5 | -3.8 | -5.5 | -3.8 | -5.2 | -1   | -5.3 | -5.4 | -4.8 | -2   | -4.3 | -5.7 | -6.1 | -5.5 | -5.3 | -6.1 | -5.5 | -5.7 | -6   | -6.1 | -5.9 | -6.2 | -5.8 | 1.21  |       |
| 666 | -6.2 | -5.8 | -5   | -4.5 | -5.4 | -5.8 | -4.9 | -5.9 | -6   | -5.3 | -5   | -4.4 | -5.1 | -5.7 | -5.9 | -5.6 | -5.4 | -5.3 | -5.6 | -5.8 | -3.9 | -6   | -6.5 | -6.4 | -7.4 | -5.5 | -6.3 | -6   | -6.3 | -6    | 0.70  |
| 667 | -5.4 | -5.3 | -4.6 | -4.6 | -5.1 | -4.9 | -4.5 | -5.3 | -4.7 | -4.7 | -4.8 | -4.5 | -4.2 | -5.4 | -4.9 | -4.9 | -4.8 | -5   | -4.8 | -2.9 | -5.7 | -5.3 | -5.4 | -5.3 | -4.9 | -5.4 | -5.1 | -5.5 | -5.5 | 0.53  |       |
| 668 | -5.1 | -4.6 | -5   | -4.8 | -5.1 | -5   | -4.4 | -5.1 | -5.2 | -4.8 | -5   | -4.5 | -4.3 | -5   | -5.2 | -4.7 | -4.8 | -4.8 | -5.4 | -5.1 | -3.9 | -5.9 | -5.1 | -5.7 | -4.9 | -5.3 | -5   | -5.3 | -5.1 | -5    | 0.39  |
| 669 | -4.9 | -4.5 | -5   | -4.9 | -5   | -4.9 | -5.1 | -4.6 | -6.4 | -4.5 | -5.3 | -4.6 | -4.5 | -5.2 | -4.9 | -4.1 | -4.5 | -5   | -5.8 | -5.5 | -2.2 | -5.3 | -5.3 | -5.5 | -5.9 | -5.4 | -5.5 | -5.9 | -5.7 | -5.8  | 0.75  |
| 670 | -5.4 | -4.8 | -4.9 | -4.8 | -5   | -4.9 | -4.6 | -4.7 | -5.1 | -5.1 | -4.6 | -4.7 | -4.8 | -5.2 | -5   | -4.7 | -4.7 |      |      |      |      |      |      |      |      |      |      |      |      |       |       |

|     |      |      |      |      |      |      |      |      |      |      |      |      |      |      |      |      |      |      |      |      |      |      |      |      |      |      |      |      |      |      |       |      |
|-----|------|------|------|------|------|------|------|------|------|------|------|------|------|------|------|------|------|------|------|------|------|------|------|------|------|------|------|------|------|------|-------|------|
| 711 | -6.2 | -5.5 | -4.6 | -3.5 | -5.3 | -5.3 | -4.6 | -4.6 | -5.2 | -4.2 | -5.1 | -1.4 | -4.9 | -5.8 | -5.3 | -5.1 | -4.8 | -4.5 | -4.8 | -5.5 | -1.3 | -5.2 | -6.1 | -5.6 | -5.7 | -6.4 | -6.2 | -6.2 | -6.5 | -6.3 | 1.23  |      |
| 712 | 16.2 | 14.8 | 22   | 23.1 | 16.2 | 0.3  | 18.7 | 5.9  | 10.9 | 27.3 | 3.1  | 34   | 10.1 | 13.3 | 1.5  | 5.3  | 5.2  | 7.9  | 2.1  | 13.7 | 56.4 | 5    | -0.1 | -1.5 | -5.2 | -5.2 | -5   | -5.9 | -4.4 | -5.2 | 13.74 |      |
| 713 | -6.9 | -4.7 | -5.8 | -4.5 | -7   | -6.2 | -4.5 | -4.3 | -8   | -3.5 | -7.3 | -16  | -5.9 | -5.5 | -6.4 | -4.6 | -6   | 6.2  | -7.2 | -6.2 | -2.4 | -6.6 | -6.9 | -6.5 | -7.1 | -7   | -6.7 | -7.8 | -7   | -7.7 | 1.56  |      |
| 714 | -4.8 | -4.6 | -4.7 | -4.8 | -5.1 | -4.6 | -4.8 | -4.7 | -5.2 | -4.9 | -4.6 | -4.5 | -4.5 | -5   | -5   | -4.7 | -4.5 | -4.9 | -5   | -4.6 | -2.5 | -6.1 | -5.5 | -5.1 | -5.2 | -5   | -4.9 | -4.8 | -4.8 | -5.1 | 0.55  |      |
| 715 | -6   | -5.1 | -4.7 | -3.9 | -6.5 | -5.4 | -4.2 | -5   | -6.6 | -3.9 | -6.6 | -4   | -4.7 | -5.4 | -4.8 | -4.4 | -6.4 | -4.7 | -5.5 | -5.1 | -3.6 | -5.4 | -5.8 | -5.9 | -5.6 | -5.8 | -5.6 | -5.5 | -5.5 | -5.5 | 0.82  |      |
| 716 | -4.5 | -5.2 | -3.5 | -3.8 | -4.2 | -4.5 | -3.7 | -4   | -4.1 | -2.2 | -4.9 | -2.3 | -4.3 | -4.3 | -3.4 | -1.9 | -3.7 | -3.3 | -4.3 | -4.2 | 5.9  | -3.8 | -5.7 | -6.1 | -5.8 | -5.7 | -5.8 | -6.7 | -6.1 | -6.2 | 2.24  |      |
| 717 | -5.2 | -4.5 | -4.6 | -4.7 | -5.1 | -5.5 | -4.7 | -4.8 | -5.7 | -5.1 | -5   | -4.9 | -4.6 | -4.9 | -4.7 | -4.3 | -4.6 | -5.6 | -5.4 | -5.1 | -4   | -5.5 | -5.7 | -5.7 | -5.3 | -5.6 | -5.4 | -5.6 | -5.4 | -5.4 | 0.45  |      |
| 718 | -6.4 | -2.6 | 0.1  | 1.9  | -6.8 | -7.2 | -4.4 | 0.4  | -7.4 | 2.5  | -6.7 | 8.1  | -3.9 | 2.6  | -5.6 | 2.6  | -5.1 | -6.6 | -7   | -5.9 | -4.4 | -2.5 | -7.9 | -3.6 | -7.6 | -7.2 | -6.9 | -7.7 | -6.8 | -7.9 | 4.16  |      |
| 719 | -6.1 | -6.3 | -5.8 | -5.5 | -6.5 | -5.7 | -5.4 | -6.4 | -6   | -5.7 | -5.5 | -5.6 | -5   | -6   | -6.5 | -5.4 | -5.4 | -6.2 | -5.9 | -1.5 | -6.9 | -6.6 | -6.8 | -6.3 | -6.3 | -6.2 | -6.6 | -6.2 | -6.2 | -6.2 | 0.95  |      |
| 720 | -4.9 | -5.1 | -4.7 | -4.2 | -4.7 | -4.4 | -4.4 | -5.4 | -4.5 | -5.4 | -4   | -4.6 | -4.3 | -5.1 | -4.8 | -5.2 | -4.5 | -4.3 | -5.4 | -4.6 | 6.7  | -4.9 | -5.3 | -5.4 | -4.8 | -5.1 | -4.8 | -5.3 | -5.2 | -5.2 | 2.15  |      |
| 721 | -4.1 | -3.9 | -3.9 | -4.1 | -3.7 | -4.1 | -3.8 | -3.5 | -4.3 | -4.2 | -3.9 | -3.7 | -3.7 | -3.8 | -3.8 | -3.6 | -3.9 | -3.9 | -3.8 | -3.9 | -4   | -4.1 | -3.9 | -4.3 | -4.1 | -4   | -4.2 | -4.1 | -4.1 | -4.2 | 0.20  |      |
| 722 | -5.4 | -4.4 | -4.3 | -4.3 | -4.8 | -4.8 | -4.9 | -4.2 | -5.4 | -4.6 | -4.8 | -4.8 | -4.7 | -4.8 | -4.1 | -4.5 | -4.8 | -4.9 | -5   | -3.4 | 5    | -5.1 | -5.3 | -5.4 | -5.2 | -5.4 | -5.2 | -5.5 | -5.4 | -5.4 | 0.48  |      |
| 723 | -5.3 | -4.5 | -3.1 | -3.3 | -4.6 | -4.7 | -3.3 | -4.3 | -5.4 | -2   | -5.6 | -2.5 | -4.5 | -3.9 | -5.5 | -1.3 | -4.3 | -5.3 | -5.8 | -5.3 | 1.8  | -6.2 | -6.4 | -5.2 | -6   | -5.9 | -6.4 | -5.7 | -6.2 | -6.2 | 1.80  |      |
| 724 | -5.1 | -5   | -4.5 | -3.1 | -5.6 | -4.7 | -4.7 | -4.8 | -6.1 | -3.7 | -4.8 | -2   | -4.9 | -5.6 | -5.3 | -4.1 | -4.8 | -4.8 | -6.1 | -5.1 | -0.8 | -5.3 | -8   | -5.5 | -6.3 | -6.2 | -5.3 | -5.5 | -6.2 | -6.2 | 1.34  |      |
| 725 | -4.6 | -4.6 | -4.9 | -4.6 | -4.5 | -5.1 | -4.5 | -4.6 | -5.2 | -4.6 | -4.4 | -4.7 | -4.4 | -5   | -4.7 | -4.2 | -4.4 | -4.6 | -4.4 | -4.3 | -3.9 | -5.5 | -4.9 | -6.2 | -4.9 | -4.9 | -4.7 | -5.1 | -5   | -5   | 0.43  |      |
| 726 | -5.9 | -5.3 | -5.3 | -4.6 | -5.4 | -5.3 | -5   | -5.3 | -7.1 | -5.1 | -6.4 | -4.8 | -6.2 | -6.1 | -5.3 | -5.4 | -5   | -5.7 | -6.6 | -5.2 | -4.3 | -6   | -6.8 | -5.9 | -6.5 | -6.3 | -5.6 | -6.3 | -6.4 | -6.1 | 0.69  |      |
| 727 | -5.1 | -4.4 | -4.2 | -4.3 | -4.9 | -5.1 | -4.6 | -4.5 | -5.5 | -4   | -4.8 | -4.5 | -4.3 | -4.9 | -4.5 | -4.2 | -4.4 | -5   | -5.5 | -5.2 | -1.2 | -5   | -5.3 | -5.2 | -5.3 | -5.1 | -5   | -5.2 | -5.2 | -5.2 | 0.79  |      |
| 728 | -5   | -4.6 | -4.6 | -4.5 | -4.6 | -4.3 | -4.8 | -4.9 | -5.3 | -4.3 | -4.5 | -5   | -4.5 | -5.1 | -4.7 | -4.5 | -4.5 | -4.6 | -5.4 | -4.8 | -5.2 | -5.1 | -4.6 | -4.9 | -4.8 | -4.7 | -5.1 | -4.7 | -5.1 | -4.7 | 0.31  |      |
| 729 | -6.3 | -6.6 | -5.9 | -5.6 | -5.8 | -5.7 | -5.4 | -6.6 | -6   | -6.3 | -5.8 | -5.3 | -5.6 | -6.5 | -6.2 | -6.7 | -5.9 | -5.6 | -6.1 | -5.6 | -2.1 | -7.5 | -6.6 | -7.1 | -6.3 | -6.3 | -6.2 | -6.5 | -6.5 | -6.2 | 0.89  |      |
| 730 | -5.6 | -4.9 | -4.3 | -4.5 | -5.4 | -4.7 | -4.2 | -5.3 | -6.1 | -5   | -5.3 | -4.6 | -5.8 | -5.2 | -4.6 | -4.9 | -4.3 | -4.5 | -5.2 | -5.1 | -3.9 | -5.3 | -5.4 | -4.9 | -5.1 | -5.7 | -4.6 | -5.9 | -5.5 | -5.5 | 0.54  |      |
| 731 | -4.1 | -3.9 | -4   | -4.2 | -3.9 | -4.3 | -3.9 | -3.8 | -4.3 | -4   | -3.7 | -3.8 | -3.7 | -4.1 | -3.8 | -3.7 | -3.8 | -4.2 | -4   | -3.7 | -3.8 | -4.7 | -4.3 | -4.3 | -4.1 | -4   | -3.9 | -4   | -4.1 | -4.1 | 0.23  |      |
| 732 | -5.7 | -4.7 | -3.5 | -3.8 | -5.4 | -4.7 | -5.3 | -3.7 | -5.9 | -3.9 | -5.2 | -4.3 | -5.3 | -4.8 | -4.4 | -3   | -4.9 | -5.2 | -5.6 | -5.2 | -2.2 | -5.2 | -5.5 | -4.8 | -5.9 | -5.5 | -5.3 | -5.4 | -5.6 | -5.5 | 0.89  |      |
| 733 | 11   | 12   | 8.8  | 20.6 | -1   | 5    | 16.8 | 7.9  | -0.3 | 13.1 | 5.2  | 30.9 | 10.3 | 5.3  | 12.9 | 6.2  | 5.8  | 3.8  | -1   | -0.7 | 49.6 | 2    | -5.1 | -4.3 | -5.1 | -6.2 | -4.9 | -5.5 | -5.7 | -4.8 | 12.11 |      |
| 734 | -6.4 | -6   | -5.6 | -5.1 | -5.9 | -5.7 | -5.9 | -6.3 | -6   | -5.5 | -6.2 | -5.3 | -5.6 | -6.1 | -5.8 | -6   | -5.6 | -5.9 | -6.4 | -5.9 | -3.5 | -6.5 | -6.6 | -6.9 | -6.5 | -6.2 | -6.4 | -6.4 | -6.4 | -6.5 | 0.62  |      |
| 735 | -5.6 | -5.1 | -5.1 | -4.6 | -5.7 | -5   | -4.5 | -5.3 | -6.1 | -5.1 | -5.2 | -4.7 | -4.6 | -5.2 | -5.5 | -4.4 | -4.6 | -4.7 | -4.8 | -5.3 | -4   | -5.9 | -5.3 | -5.3 | -5.2 | -5.6 | -5.2 | -5.7 | -5.6 | -5.6 | 0.49  |      |
| 736 | -5.2 | -4.6 | -4.9 | -5.1 | -5.2 | -5.6 | -4.4 | -5.2 | -6.1 | -5   | -5   | -4.8 | -5.1 | -5.1 | -4.4 | -4.8 | -4.9 | -5.5 | -5.2 | -4.2 | -6.1 | -5.4 | -5.6 | -5.4 | -5.6 | -5.9 | -5.6 | -5.9 | -5.8 | -5.8 | 0.50  |      |
| 737 | -5.9 | -5.2 | -4.2 | -4.4 | -5.6 | -5.9 | -5.8 | -5.5 | -6   | -2.8 | -5.7 | 1.1  | -6   | -4.8 | -5.8 | -3.6 | -4   | -5.3 | -6.2 | -5.7 | 4.2  | -5.5 | -7   | -5.5 | -6.3 | -6.3 | -6.5 | -6   | -6.3 | -6.3 | 2.30  |      |
| 738 | -4   | -3.8 | -4.5 | -4   | -4.1 | -4.1 | -3.8 | -4.4 | -3.9 | -3.8 | -4.2 | -4.2 | -4   | -4.4 | -4.1 | -4.1 | -4.2 | -3.7 | -4.1 | -3.6 | -4.9 | -5.1 | -4.2 | -4.3 | -3.9 | -4.1 | -4   | -4   | -4   | -4   | 0.32  |      |
| 739 | -3.3 | 1.4  | 0.9  | 7    | -3.9 | -2.3 | 1.3  | 0.4  | -4.2 | 4.1  | -3.4 | 0.9  | -2   | -1.3 | -2.9 | 3    | -2.1 | -2.3 | -3   | -2.6 | 8.3  | -1.1 | 5    | -4.2 | -5.3 | -5.1 | -4.7 | -5.1 | -4.7 | -5.2 | 3.58  |      |
| 740 | -4.5 | -4.2 | -4.5 | -4.1 | -5.1 | -4.6 | -4.5 | -4.7 | -5.6 | -4.6 | -4.5 | -4.3 | -4.5 | -4.7 | -4.3 | -4.3 | -4.4 | -4.9 | -4.9 | -4.7 | -4   | -4.7 | -5.1 | -5.3 | -5.4 | -4.9 | -5.7 | -5.9 | -4.9 | -6   | 0.52  |      |
| 741 | -4.9 | -4.6 | -4.7 | -4.7 | -4.7 | -4.6 | -4.7 | -4.7 | -5.9 | -4.5 | -5.2 | -4.5 | -4.8 | -5.4 | -4.8 | -4.3 | -4.5 | -4.6 | -5   | -4.7 | -4.1 | -5.5 | -4.8 | -4.9 | -5.3 | -5.2 | -5.4 | -5.1 | -5.1 | -5.2 | 0.39  |      |
| 742 | -6.3 | -5.5 | -2.8 | -2   | -5.5 | -4.7 | -5.6 | -3   | -7.2 | -1.5 | -5.8 | -2.7 | -2.9 | -4.1 | -5.7 | -4.3 | -5.8 | -5.2 | -7.1 | -5   | 3.4  | -4.3 | -6.9 | -5.8 | -6.6 | -5.9 | -5.8 | -6.9 | -6.4 | -6.9 | 2.22  |      |
| 743 | -5.3 | -4.2 | -3.5 | -4.3 | -5.5 | -5.1 | -4.8 | -4.6 | -6.5 | -4.5 | -5.3 | -2.1 | -4.6 | -5.3 | -5.1 | -3.5 | -4.9 | -5.9 | -5.5 | -4.8 | 1.5  | -5.7 | -6.4 | -6.3 | -6.6 | -6.1 | -6.5 | -6.8 | -6.3 | -6.8 | 1.65  |      |
| 744 | -5.3 | -4.7 | -5.2 | -4.5 | -5.1 | -5   | -4.9 | -5   | -6   | -5.1 | -4.9 | -5   | -5.1 | -5.8 | -5.1 | -4.5 | -4.8 | -5   | -5.5 | -5.1 | -2.3 | -5.3 | -5.1 | -6   | -5.5 | -5.4 | -5.3 | -5.5 | -5.2 | -5.4 | 0.64  |      |
| 745 | -4.8 | -4.4 | -4.4 | -4.8 | -4.4 | -5.2 | -4.3 | -4.5 | -5.2 | -4.7 | -4.2 | -5.2 | -4.4 | -4.8 | -4.7 | -4.3 | -4   | -4.5 | -5.1 | -4.5 | -3.2 | -5.5 | -4.6 | -5   | -5.1 | -4.9 | -4.9 | -5.1 | -4.8 | -4.8 | 0.45  |      |
| 746 | -5.8 | -5   | -4.1 | -4.6 | -5.6 | -5   | -4.7 | -4.2 | -6.4 | -4.4 | -5.7 | -5.1 | -5.2 | -5.2 | -5.2 | -2.4 | -4.5 | -5.7 | -5.8 | -5.4 | -4.8 | -5.3 | -6.6 | -5.8 | -5.9 | -6.1 | -6.4 | -6.1 | -6.3 | -6.1 | 0.88  |      |
| 747 | -5.5 | -5.3 | -5.1 | -4.3 | -5   | -5.2 | -4.7 | -5.7 | -7.2 | -4.5 | -5   | -4.9 | -5.4 | -6.1 | -5.2 | -5.2 | -5   | -5.2 | -4.8 | -5.4 | -5.3 | -4.8 | -6.2 | -6.1 | -5.7 | -6   | -5.7 | -5.9 | -6.1 | -5.9 | -6    | 0.62 |
| 748 | -5.3 | -4.6 | -4.2 | -3.4 | -5.2 | -5.3 | -5.1 | -5.1 | -6.1 | -2.7 | -5.7 | -2.9 | -3.9 | -5.2 | -4.6 | -4.5 | -4.3 | -5.5 | -6   | -4.9 | -0.7 | -5.9 | -6.1 | -5.7 | -5.4 | -5.5 | -5.8 | -5.7 | -5.5 | -5.8 | 1.20  |      |
| 749 | -4.1 | -4.1 | -3.6 | -1.9 | -1.9 | -4.2 | -3.3 | -4   | -4.4 | 0.8  | -3.5 | 0.8  | -3.1 | -4.2 | -4.8 | -3.6 | -3.1 | -3.8 | -4.6 | -4.2 | 2.1  | -5.2 | -6.8 | -4.7 | -6.7 | -5.9 | -6.1 | -7   | -5.7 | -5.6 | 2.06  |      |
| 750 | -5.7 | -5.1 | -4.6 | -4.6 | -5.2 | -5.2 | -4.5 | -5.3 | -5.1 | -4.7 | -4.3 | -4.7 | -4.6 | -5.1 | -4.9 | -4.4 | -5.2 | -4.9 | -5.7 | -5.7 | -1.9 | -6.2 | -6.1 | -5.4 | -5.8 | -5.6 | -5.9 | -5.9 | -5.7 | -6.1 | 0.82  |      |
| 751 | -2.5 | 0.7  | -1   | 11.2 | -2.1 | 0    | -1.5 | 6.6  | -3.1 | 4.1  | -3.9 | 18.5 | -3   | 4.1  | 3.9  | 7    | -3.4 | -4.5 | -2.4 | -1   | -4.2 | -3.6 | -6.9 | -4.2 | -6.2 | -6.5 | -6.6 | -6.4 | -5.7 | -6.3 | 5.92  |      |
| 752 | 25.2 | 13   | 46.5 | 50.6 | 32.8 | 32.8 | 8.6  | 33.1 | 32.3 | 47.5 | 14.9 | 30.4 | 11.1 | 35.4 | 15.5 | 34.7 | 8    | 42.3 | 13.7 | 10.4 | 22.5 | 17.1 | -3.9 | 5    | -3.7 | -3   | -2.8 | -3.2 | -3   | -1.9 | 17.25 |      |
| 754 | -4.4 | -4   | -4.1 | -5   | -4   | -4.6 | -4.6 | -3.9 | -5.2 | -4.9 | -4.7 | -4.3 | -4   | -4.2 | -4.3 | -3.6 | -3.8 | -4.5 | -4.4 | -4.1 | -3.3 | -5   | -4.4 | -5   | -4.7 | -4.5 | -4.5 | -4.5 | -4.5 | -4.8 | 0.44  |      |
| 755 | 24   | 2.2  | 15.9 | 37.6 | 3.6  | 4.3  | 15.9 | 8.8  | 0.1  | 47.1 | 1.9  | 18.7 | 8.7  | 32.4 | 1.5  | 26.7 | 3.7  | 0    | 10.6 | 17.1 | 13.6 | 14.8 | -7.5 | 9    | -6.2 | -6.7 | -6.4 | -7.3 | -6.6 | -7   | 14.16 |      |
| 756 | -3   | -2.4 | -2.9 | -3.2 | -2.5 | -3   | -3   | -2.6 | -3   | -2.9 | -2.6 | -3.2 | -2.7 | -3   | -2.6 | -2.4 | -2.6 | -2.6 | -2.5 | -2.6 | -3   | -3.2 | -2.7 | -3.4 | -2.7 | -2.4 | -2.7 | -2.6 | -2.7 | -2.6 | 0.26  |      |
| 757 | -4.7 | -4.1 | -3.9 | -3.8 | -4.3 | -4.6 | -4.6 | -4.2 | -6.1 | -4.1 | -3.9 | -3.6 | -4   | -4.8 | -4   | -4.2 | -4.4 | -4   | -4.6 | -4.7 | -1.9 | -4.9 | -5.7 | -5.4 | -5   | -5.1 | -5.9 | -6.3 | -6.4 | -6.1 | 0.94  |      |
| 758 | -4.2 | -3.3 | -3.2 | -2.8 | -4.2 | -4.8 | -4.2 | -3   | -5.6 | -1.1 | -4.5 | -2.3 | -2.8 | -3.7 | -4.5 | -1.4 | -4   | -4.7 | -6.6 | -5.1 | 10.2 | -5.1 | -6.2 | -5.6 | -5.3 | -5.8 | -5.8 | -6.2 | -5.7 | -5.7 | 3.02  |      |
| 759 | -5.8 | -4.9 | -4   | -3.9 | -5.1 | -5.3 | -4.7 | -5.4 | -5.7 | -3.8 | -5.6 | -3.7 | -3.9 | -4.9 | -5   | -4.6 | -4.3 | -5.7 | -5.5 | -5.3 | -3.8 | -5.6 | -5.9 | -5.6 | -6.1 | -6.2 | -6.1 | -6.2 | -6.2 | -6.1 | 0.83  |      |
| 760 | -5.6 | -3.6 | -3   | -2.2 | -5.  |      |      |      |      |      |      |      |      |      |      |      |      |      |      |      |      |      |      |      |      |      |      |      |      |      |       |      |

|     |       |       |       |       |      |       |       |      |       |       |      |       |       |       |       |       |       |       |       |       |       |       |      |       |       |      |       |      |      |      |       |
|-----|-------|-------|-------|-------|------|-------|-------|------|-------|-------|------|-------|-------|-------|-------|-------|-------|-------|-------|-------|-------|-------|------|-------|-------|------|-------|------|------|------|-------|
| 801 | -5.7  | -5.6  | -5.5  | -5.6  | -5.2 | -5.1  | -4.7  | -6   | -6.1  | -5.7  | -4.9 | -6    | -5    | -5.9  | -5.2  | -5.4  | -6.1  | -5.1  | -5.7  | -5.7  | -4    | -6.9  | -6.3 | -6.9  | -5.7  | -5.6 | -5.7  | -5.7 | -5.8 | -5.8 | 0.59  |
| 802 | -5    | -4.7  | -5.3  | -4.7  | -4.7 | -5.2  | -4.7  | -5.2 | -5.6  | -5    | -4.8 | -4.6  | -4.8  | -5.3  | -5.1  | -4.6  | -4.8  | -4.5  | -4.8  | -4.7  | -4.2  | -5.6  | -4.9 | -5.3  | -5.4  | -5.2 | -5.2  | -4.9 | -4.9 | -5   | 0.33  |
| 803 | -5.1  | -4.3  | -4.5  | -4    | -5.1 | -4.8  | -4.4  | -4.5 | -5.3  | -4.8  | -4.8 | -4.7  | -5.1  | -4.5  | -4.4  | -3.4  | -4.5  | -4.9  | -4.8  | -4.5  | -2.1  | -5.2  | -4.9 | -5.1  | -5.8  | -5.4 | -5.6  | -5.5 | -5.4 | -5.8 | 0.73  |
| 804 | -4.9  | -0.8  | 0.1   | 0.7   | -3.3 | -3.4  | -2.8  | -3.3 | -5.5  | -3.5  | -5.6 | 3.4   | -2    | -2.1  | -4.1  | -1.9  | -4.8  | -5.9  | -6.2  | -5.3  | 2     | -5.2  | -7.4 | -5.4  | -5.8  | -5.4 | -6.3  | -5.8 | -5.7 | -6   | 2.66  |
| 805 | -4.8  | -4    | -4    | -3.7  | -4.7 | -4.7  | -4.4  | -3.8 | -5.3  | -3.9  | -4.3 | -3    | -4.4  | -4.7  | -4.5  | -3.7  | -4.7  | -4.6  | -4.8  | -4.4  | -0.5  | -4.7  | -4.8 | -5.1  | -4.7  | -4.8 | -4.6  | -4.7 | -5.1 | -4.8 | 0.88  |
| 806 | -5.7  | -4.2  | -3.1  | -3.2  | -4.4 | -5.3  | -3.4  | -4.6 | -7.3  | -1.6  | -6   | -4.2  | -5.9  | -5    | -5.6  | -2.1  | -4.1  | -5.3  | -6.2  | -4.9  | 1.8   | -5.5  | -5.7 | -5.3  | -6.2  | -6.1 | -6.2  | -6   | -6.1 | -6.4 | 1.82  |
| 807 | -4.8  | -4.2  | -4.4  | -4.3  | -4.6 | -4.5  | -4    | -4.7 | -4.9  | -4.5  | -4.9 | -4.3  | -4.4  | -4.6  | -4.9  | -4.3  | -4.5  | -4.5  | -4.6  | -4.6  | -4    | -5.1  | -5.3 | -4.7  | -5.2  | -4.9 | -4.9  | -5.1 | -4.6 | -4.9 | 0.33  |
| 808 | -7.2  | -4.9  | -5.2  | -3.7  | -7   | -6.6  | -6.1  | -5   | -8    | -3.8  | -7.7 | -2.9  | -6.3  | -5.3  | -6.4  | -3.2  | -6.2  | -5.7  | -7.4  | -6.5  | 1.4   | -6.3  | -7   | -6.1  | -7    | -7   | -6.8  | -7.2 | -7.1 | -7.3 | 1.91  |
| 809 | -5.3  | -3    | 1.4   | 0.2   | -5.3 | -4.6  | -3.9  | 3    | -5.6  | -0.3  | -4.5 | 3     | -3.9  | -0.6  | -4    | -0.6  | -3.7  | -4.5  | -5.3  | -5.7  | 5.1   | -4    | -7.3 | -4.2  | -6.1  | -6.3 | -6.6  | -6.8 | -6.6 | -6.9 | 3.31  |
| 810 | -4.7  | -4.4  | -4.4  | -4.4  | -5.4 | -5    | -4.6  | -5   | -6    | -4.3  | -5.5 | -4.2  | -3.9  | -5.2  | -4.4  | -4.4  | -4.3  | -5    | -5.8  | -4.7  | -4.4  | -5.3  | -5.4 | -4.9  | -5    | -4.8 | -4.8  | -4.9 | -4.7 | -4.9 | 0.49  |
| 811 | -5.4  | -3.8  | -3.1  | -3.5  | -5.3 | -5    | -4.3  | -4.7 | -5.8  | -4.3  | -5.7 | -4.1  | -4    | -5.4  | -5.9  | -3.8  | -5.1  | -5.2  | -5.7  | -5.1  | 1.3   | -6.3  | -6.6 | -5.7  | -5.4  | -6.3 | -5.4  | -5.6 | -5.7 | 1.46 |       |
| 813 | -4.7  | -4.5  | -4.1  | -3.9  | -4.9 | -4.7  | -4.8  | -4.3 | -5.1  | -5.3  | -4.6 | -4.5  | -4.6  | -4.6  | -4.7  | -4.5  | -4    | -4.3  | -4.6  | -4.3  | -3.8  | -5.2  | -5.1 | -4.8  | -5.1  | -4.9 | -5.2  | -4.9 | -4.8 | -5.1 | 0.40  |
| 814 | -1.5  | 1.2   | -0.1  | -1    | -4.2 | -0.3  | 0.3   | 3.3  | -4.8  | 7.8   | -4.2 | 12.7  | 1.1   | 2.7   | 0.1   | 3.7   | -2.9  | -2.8  | -2.8  | -1.5  | 8     | -6    | -6.2 | -5.3  | -6.1  | -6.6 | -5.8  | -6.9 | -6.5 | -6.9 | 4.93  |
| 815 | -5.2  | -5.3  | -4.4  | -4.5  | -5.8 | -6.1  | -4.6  | -4.5 | -6.4  | -4.3  | -5.7 | -2.6  | -4.7  | -5.4  | -5    | -3.8  | -4.8  | -5.5  | -6.4  | -5.9  | -4.1  | -5.9  | -6.6 | -6    | -5.8  | -5.6 | -5.8  | -6   | -5.6 | -5.6 | 0.89  |
| 816 | -5.9  | -5.4  | -5.5  | -4.9  | -5.4 | -5.9  | -4.9  | -5.6 | -7    | -5.2  | -5.1 | -5    | -4.8  | -5.9  | -5.3  | -5.1  | -5.8  | -5    | -6.1  | -5.4  | -4.1  | -6.2  | -6.6 | -6.1  | -5.9  | -6.4 | -5.8  | -6.3 | -6.1 | -5.8 | 0.62  |
| 817 | -5    | -5.1  | -5    | -4.6  | -4.9 | -4.8  | -4.6  | -5.2 | -5.1  | -5.3  | -5.1 | -4.6  | -4.5  | -5.6  | -4.9  | -5.2  | -4.8  | -4.6  | -5.3  | -4.7  | -3.8  | -6    | -5.1 | -5.2  | -5.2  | -5.1 | -5.3  | -5.2 | -5.3 | -5.3 | 0.40  |
| 818 | -5    | -4.7  | -3.7  | -3.9  | -5.2 | -4.2  | -5.3  | -4.7 | -5.6  | -4.2  | -5.9 | -3.8  | -4    | -4.6  | -4.4  | -3    | -4.3  | -4.7  | -5.8  | -4.5  | 1.9   | -5.5  | -6.6 | -5.8  | -5.7  | -6.1 | -6.3  | -5.6 | -6.4 | -5.5 | 1.55  |
| 819 | -5.4  | -5.2  | -5    | -4.4  | -5.2 | -5.3  | -4.8  | -5.7 | -5.5  | -4.6  | -5.2 | -4.4  | -5.5  | -5.5  | -4.1  | -5    | -4.9  | -5.2  | -5    | -5.2  | -2.3  | -6.2  | -6.2 | -5.1  | -5.5  | -5.8 | -6    | -6.1 | -5.3 | -5.6 | 0.72  |
| 820 | -1.3  | 3.4   | 10.2  | 12.4  | 2.4  | 2.9   | 10.2  | 7.9  | -0.7  | 5.9   | 5.8  | 17.8  | 10.5  | 1.8   | -1.5  | 6.3   | 3.5   | 0.2   | 4.4   | -2.4  | 33.5  | -1.8  | -5.2 | -3.2  | -5.9  | -6.2 | -6.1  | -6   | -6.6 | -5.8 | 8.65  |
| 821 | -5.2  | -5    | -3.1  | -3.3  | -5.6 | -5    | -5.3  | -4   | -6.4  | -2.6  | -5.7 | -3.5  | -5.5  | -3.9  | -5.5  | -2.4  | -5    | -5.5  | -5.1  | -3.1  | -5.6  | -5.4  | -5.3 | -5.9  | -5.3  | -5.5 | -5.6  | -5.4 | -5.8 | 1.07 |       |
| 822 | -5.7  | -4.4  | -4.5  | -5.5  | -5   | -5.1  | -5.3  | -4.7 | -6.2  | -4.5  | -5.5 | -4.8  | -4.8  | -4.8  | -4.7  | -4.3  | -4.4  | -5.6  | -5.6  | -5.2  | -4.5  | -5.8  | -6.4 | -5    | -6.1  | -5.5 | -6.1  | -5.8 | -5.9 | -6.1 | 0.63  |
| 823 | -4.4  | -3.9  | -4.6  | -3.7  | -5.2 | -4.8  | -3.7  | -4.3 | -5.3  | -3.6  | -5.1 | -3.4  | -4.3  | -5.3  | -4.4  | -4.2  | -4.3  | -4.1  | -4.7  | -4.3  | -2.3  | -4.8  | -5.9 | -4.7  | -5.5  | -4.6 | -5.3  | -5.7 | -4.7 | -5.3 | 0.77  |
| 825 | -5.7  | -4.7  | -5.1  | -4.7  | -6   | -5.5  | -4.8  | -4.7 | -6.8  | -4.9  | -6   | -5.3  | -5.7  | -5.8  | -6    | -4.7  | -4.9  | -5.2  | -6.3  | -5.7  | -4.5  | -5.8  | -6.4 | -5.4  | -6    | -5.6 | -5.7  | -6.4 | -5.7 | -6   | 0.61  |
| 826 | -4.1  | -4.1  | -3.5  | -3.3  | -4.3 | -3.7  | -4    | -3.8 | -5.7  | -3.1  | -5   | -2.1  | -3.6  | -3.5  | -4    | -3.5  | -3.9  | -4.3  | -4.3  | -4.5  | -2.1  | -5    | -6   | -4.7  | -4.7  | -5.2 | -4.3  | -4.4 | -4.5 | -4.5 | 0.87  |
| 827 | -4.7  | -3.4  | -3.9  | -3.3  | -4.6 | -4.8  | -4.4  | -4.1 | -5.9  | -4.5  | -5.3 | 0.6   | -4.5  | -5.4  | -4.8  | -0.9  | -3.9  | -5    | -4.7  | -4.4  | -2.2  | -4.2  | -5.6 | -5.1  | -5.5  | -5.9 | -5.2  | -5.4 | -5.9 | -5.4 | 1.44  |
| 828 | -6    | -4.2  | -5.3  | -4.4  | -5.4 | -5.1  | -5.8  | -3.8 | -6.6  | -3.9  | -5.7 | -4.4  | -5.2  | -5.4  | -5.5  | -3.9  | -4.3  | -5.6  | -5.8  | -5.2  | -1.9  | -6.2  | -5.7 | -5    | -6.2  | -5.4 | -6.1  | -5.7 | -5.7 | -6.1 | 0.98  |
| 829 | -3.7  | -3.6  | -3.5  | -3.2  | -3.6 | -3.7  | -3.3  | -3.5 | -4.6  | -3.4  | -3.6 | -3.3  | -3.9  | -3.9  | -3.5  | -3.3  | -3.2  | -3.3  | -3.9  | -3.6  | -3.6  | -4.5  | -4.2 | -3.8  | -4.2  | -3.8 | -4    | -4.1 | -3.9 | -4.3 | 0.38  |
| 830 | -3.8  | -3.4  | -3.6  | -4    | -3.8 | -3.5  | -3.6  | -3.4 | -3.8  | -3.8  | -3.5 | -3.6  | -3.3  | -3.6  | -3.7  | -3    | -3.7  | -3.3  | -3.1  | -3.4  | -4    | -3.9  | -3.1 | -3.8  | -3.6  | -3.4 | -3.4  | -3.4 | -3.4 | -3.5 | 0.25  |
| 831 | -5.6  | -5.5  | -5.2  | -4.7  | -5   | -5.6  | -4.9  | -5.3 | -5.5  | -4.8  | -5   | -5.8  | -4.9  | -6.1  | -5    | -5.2  | -5.1  | -5.1  | -5.7  | -5.7  | -2.5  | -6.5  | -6.5 | -5.7  | -5.9  | -6.1 | -5.9  | -6   | -5.9 | -6   | 0.74  |
| 832 | -5.4  | -4.8  | -4.3  | -3.8  | -4.8 | -4.9  | -4.8  | -4.5 | -6.4  | -4.4  | -5.8 | -4.6  | -5.5  | -5.1  | -4.5  | -4.6  | -5    | -5.2  | -6.2  | -5.5  | -3    | -5.2  | -5.3 | -5.5  | -5.6  | -5.9 | -5.5  | -5.9 | -5.9 | -5.8 | 0.73  |
| 833 | -5.8  | -4.2  | -4.5  | -4.5  | -5.7 | -5    | -4.9  | -5.2 | -6.3  | -4.3  | -6.4 | -4.6  | -5.2  | -4.8  | -5.5  | -4.1  | -5    | -5.2  | -5.9  | -5.4  | -4.3  | -6    | -5   | -5.4  | -5.9  | -6   | -5.6  | -5.8 | -5.7 | -5.8 | 0.66  |
| 834 | -4    | -3.8  | -4.2  | -4.2  | -4.1 | -3.9  | -3.9  | -4   | -4.2  | -4    | -3.9 | -4.3  | -4.2  | -4.6  | -4.2  | -3.9  | -3.9  | -4    | -3.9  | -4    | -4.7  | -4.3  | -4.5 | -4.5  | -4.3  | -3.9 | -4.1  | -4   | -3.9 | -4   | 0.23  |
| 835 | -5.5  | -5.1  | -4.9  | -4.5  | -5   | -4.6  | -4.5  | -5.1 | -5.1  | -4.6  | -4.8 | -4.4  | -4.6  | -5.3  | -4.6  | -4.2  | -5    | -4.8  | -5.3  | -5.1  | -2.5  | -6.2  | -5.5 | -5.3  | -5.2  | -5.4 | -5.3  | -5.4 | -5.5 | -5.5 | 0.63  |
| 836 | -5.7  | -4.6  | -1.3  | -1.7  | -5.2 | -5    | -4.5  | -4.5 | -5.5  | -3.2  | -4.7 | 1.5   | -3.5  | -3.9  | -3.8  | -1.1  | -3.3  | -5.6  | -5.6  | -6    | 2.2   | -5.7  | -6.4 | -5.2  | -6.3  | -6.1 | -6.1  | -6   | -6.2 | -6.1 | 2.23  |
| 837 | -5.3  | -4.3  | -3.3  | -3    | -4.2 | -4.8  | -3.7  | -4.3 | -5.9  | -3.7  | -5.1 | -3    | -3.4  | -5.2  | -4.8  | -3.8  | -4.4  | -4.9  | -5.5  | -4.6  | 1.7   | -5.7  | -6.3 | -5.3  | -6.5  | -5.5 | -6.2  | -5.9 | -5.8 | -6.1 | 1.57  |
| 838 | -6.1  | -5.9  | -5.7  | -5.7  | -6   | -5.6  | -5.7  | -6.5 | -5.9  | -6    | -5.6 | -6.2  | -5.6  | -6.4  | -5.8  | -6.8  | -6    | -6.2  | -6.2  | -6    | 1.6   | -7.7  | -6.4 | -6.7  | -6.1  | -6.6 | -6.1  | -6.2 | -6.5 | -6.1 | 1.48  |
| 839 | -6.1  | -4.9  | -5.1  | -4.1  | -6.3 | -6.2  | -5.1  | -5.2 | -6.6  | -4.3  | -6.6 | -4.6  | -4.6  | -5.6  | -6.3  | -3.8  | -4.5  | -5.9  | -6.7  | -6.1  | -4.4  | -6.2  | -6.6 | -6    | -6.9  | -6.5 | -6.7  | -7.1 | -6.7 | -7.3 | 1.00  |
| 840 | 142.9 | 166.2 | 187.7 | 207.3 | 169  | 158.7 | 138.7 | 174  | 137.9 | 196.6 | 153  | 208.2 | 184.6 | 186.9 | 165.2 | 168.3 | 140.9 | 169.8 | 159.3 | 162.3 | 191.5 | 161.8 | 88   | 151.1 | 108.6 | 80.1 | 103.9 | 94.1 | 93.8 | 80.3 | 37.72 |
| 841 | 66.4  | 80.9  | 104.6 | 134.1 | 113  | 86.8  | 97.5  | 93.3 | 81.2  | 113.5 | 88.6 | 155.8 | 97.1  | 91.5  | 83.6  | 92.5  | 75.1  | 96.2  | 83.2  | 113   | 85.1  | 40.4  | -1.7 | 30.1  | 10    | 2.7  | 6.1   | 16.6 | 6.8  | 5.7  | 43.22 |
| 842 | -4.5  | -4.4  | -4.4  | -5    | -4.4 | -4.8  | -4.5  | -4.5 | -5.7  | -4.5  | -4.6 | -4.6  | -4.7  | -4.7  | -4.1  | -4.4  | -4.9  | -4.3  | -4.1  | -3.8  | -5.2  | -4.8  | -5.2 | -4.8  | -4.4  | -4.6 | -4.6  | -4.5 | -4.6 | 0.36 |       |
| 843 | -4    | -3.9  | -4.3  | -4.1  | -3.8 | -3.9  | -3.8  | -4.1 | -4.5  | -4.2  | -4   | -4.1  | -3.9  | -4.2  | -4.2  | -3.9  | -4.1  | -3.8  | -4    | -3.7  | -4.5  | -4.7  | -3.8 | -4.4  | -4    | -3.8 | -3.9  | -3.9 | -3.8 | -4   | 0.24  |
| 844 | -5    | -3.8  | -4.7  | -4    | -4.4 | -4.2  | -3.9  | -4.2 | -4.9  | -4.6  | -4.2 | -4.7  | -3.9  | -4.9  | -4.4  | -3.8  | -4.3  | -4.7  | -4.5  | -4    | -0.4  | -4.8  | -5.1 | -5.7  | -4.7  | -4.9 | -4.9  | -5.2 | -5.1 | -5.2 | 0.90  |
| 845 | -5.4  | -4.8  | -5    | -5.3  | -5.3 | -5.1  | -4.8  | -5.2 | -4.8  | -4.8  | -5   | -4.9  | -4.8  | -5.2  | -5.3  | -5.2  | -5.2  | -5.3  | -5.3  | -4.9  | -3.5  | -6    | -5.2 | -5.7  | -5.4  | -5.2 | -5.5  | -5.1 | -5.4 | -5.3 | 0.41  |
| 846 | -5.4  | -5.1  | -4.6  | -4.4  | -4.6 | -5.1  | -5.2  | -5.4 | -5.7  | -4.6  | -5.1 | -3.5  | -5.2  | -5.8  | -4.9  | -4.5  | -4.7  | -5.4  | -5.7  | -5.8  | -4    | -5.7  | -6.1 | -6    | -5.7  | -5.6 | -7    | -5.6 | -6.9 | -6.8 | 0.80  |
| 847 | -6.5  | -4.5  | -2.6  | -3.3  | -5.9 | -5.5  | -4.9  | -6.1 | -6.9  | -3.1  | -5.9 | -0.6  | -5.1  | -4.5  | -6.1  | -3.7  | -4.8  | -5.8  | -6.5  | -5.5  | 1.3   | -6.1  | -7.1 | -5.3  | -6.4  | -7.4 | -6.6  | -6.4 | -6.4 | -6.7 | 1.89  |
| 848 | -4.9  | -4.2  | -4.8  | -4.5  | -4.2 | -3.7  | -3.9  | -4.5 | -4.8  | -4.3  | -4.6 | -4.3  | -4    | -4.5  | -5.1  | -4.2  | -4.1  | -4.1  | -4.8  | -4.2  | -4.3  | -5.1  | -4.7 | -4.9  | -4.5  | -4.5 | -4.8  | -4.7 | -4.8 | -4.9 | 0.36  |
| 849 | -6.1  | -6.3  | -6.1  | -5.3  | -5.8 | -5.2  | -5.2  | -6.8 | -5.9  | -5.8  | -5.9 | -5.5  | -5.7  | -6.2  | -6.6  | -6    | -6.3  | -5.7  | -6.6  | -5.8  | 5.1   | -6.3  | -6.3 | -6.3  | -6.9  | -6.5 | -6.6  | -6.5 | -6.5 | -6.8 | 2.10  |
| 850 | -6    | -4.6  | -4.9  | -4.6  | -5.6 | -5.9  | -5.4  | -5.4 | -6.4  | -4.7  | -5.8 | -4.2  | -5.7  | -5.7  | -5.8  | -5.3  | -5.2  | -5.4  | -6.2  | -5.5  | -4.4  | -5.6  | -6.3 | -5.6  | -5.7  | -6.1 | -6    | -6.4 | -5.9 | -6.1 | 0.59  |
| 851 | -5.3  | -3.8  | -4.7  |       |      |       |       |      |       |       |      |       |       |       |       |       |       |       |       |       |       |       |      |       |       |      |       |      |      |      |       |

|     |       |       |       |       |       |      |       |       |       |       |       |       |       |       |       |       |       |      |       |       |       |       |       |       |      |      |      |      |      |       |        |
|-----|-------|-------|-------|-------|-------|------|-------|-------|-------|-------|-------|-------|-------|-------|-------|-------|-------|------|-------|-------|-------|-------|-------|-------|------|------|------|------|------|-------|--------|
| 892 | -4.2  | -4.9  | -3    | -2.6  | -4.4  | -3.2 | -4.2  | -5.3  | -4.4  | -1.2  | -4.1  | 2     | -3.4  | -3.4  | -3    | -3.8  | -4.9  | -4.3 | -5.5  | -4.1  | 0.2   | -5.1  | -5.8  | -4.7  | -6.1 | -5.4 | -5.3 | -6   | -5.4 | -5.8  | 1.81   |
| 893 | -5.5  | -3.8  | -3.3  | -0.6  | -6    | -5.5 | -2.7  | -5.7  | -4.8  | -1.7  | -3.4  | -2.3  | -2.5  | -2.9  | -3.2  | -2.8  | -2.4  | -4.1 | -5.9  | -5.5  | -3    | -7.2  | -6.7  | -6.8  | -6.4 | -7.4 | -6.4 | -6.9 | -7   | -6.8  | 1.95   |
| 894 | -7.2  | -5.3  | -5.5  | -5.6  | -7.1  | -6.8 | -5    | -5.2  | -7    | -5.4  | -6    | -4.6  | -4.9  | -5.4  | -5.6  | -5.2  | -4.8  | -5.8 | -6.9  | -6.6  | -3.7  | -6.3  | -6.7  | -5.4  | -6.6 | -6.9 | -6.9 | -7   | -7.2 | -7    | 0.94   |
| 895 | -4.5  | -4.4  | -3.2  | -3.9  | -4.7  | -5.4 | -4    | -4.2  | -5.3  | -3.4  | -5.1  | -4    | -4.2  | -5    | -4.8  | -4    | -4.6  | -5   | -5.5  | -4.7  | -3.1  | -6.1  | -6.2  | -6.1  | -5.6 | -5.3 | -5.9 | -6.3 | -5.7 | -5.4  | 0.89   |
| 896 | -4.8  | -3.9  | -4.5  | -0.3  | -4.1  | -4.2 | -3.2  | -3.2  | -6.3  | -2.2  | -5.7  | 4.2   | -3.6  | -4.2  | -4.8  | 1.7   | -3.8  | -4.3 | -5.8  | -4.7  | -2.3  | -4.5  | -6.6  | -5.7  | -6.4 | -5.5 | -6.5 | -6.4 | -5.9 | -6.4  | 2.45   |
| 897 | -5.1  | -5.3  | -5    | -5    | -5.2  | -4.9 | -4.8  | -5.5  | -5.2  | -5    | -5.4  | -4.2  | -4.9  | -5.7  | -4.8  | -5.2  | -4.8  | -4.9 | -5.7  | -4.8  | -2.9  | -6.1  | -5.4  | -5.8  | -5.2 | -5.3 | -5.6 | -5.3 | -5.4 | -5.3  | 0.56   |
| 898 | -5.4  | -5.2  | -5.2  | -4.8  | -5.4  | -5.1 | -4.3  | -4.6  | -5.3  | -4.6  | -5.9  | -5    | -4.8  | -5.2  | -5.4  | -4.8  | -4.9  | -5.2 | -5.4  | -5.2  | -3.1  | -6.2  | -6    | -5.8  | -5.7 | -5   | -5.6 | -5.2 | -5.4 | -5.3  | 0.58   |
| 899 | -4.1  | -3.7  | -4    | -4.4  | -4.2  | -4.1 | -4.1  | -4    | -4.3  | -4.1  | -3.7  | -4    | -3.9  | -3.9  | -4.1  | -4.2  | -3.7  | -4   | -4.2  | -3.8  | -4.5  | -4.5  | -4.3  | -3.8  | -4   | -3.9 | -3.7 | -3.9 | -3.9 | -3.8  | 0.23   |
| 900 | -5.7  | -4.7  | -4.2  | -2.7  | -5    | -5.6 | -4.2  | -5.2  | -7    | -4.2  | -6.1  | -1.3  | -5.9  | -4.6  | -5.6  | -4.1  | -4.3  | -4.9 | -5.3  | -4.8  | -0.9  | -6.2  | -7    | -5.9  | -5.9 | -6.7 | -5.4 | -6.7 | -5.7 | -6.7  | 1.47   |
| 901 | -6.3  | -4.7  | -3.5  | -2.6  | -6.5  | -6   | -5    | -4.8  | -6.7  | -2.3  | -6.1  | 1.9   | -5.6  | -4.7  | -5.9  | 0.1   | -4.5  | -6.4 | -6.5  | -6.4  | 10.4  | -5.1  | -5.9  | -5.8  | -6.5 | -6.4 | -7   | -6.2 | -6.6 | -7    | 3.51   |
| 902 | -6    | -5.4  | -3.6  | -4.5  | -5.5  | -5.1 | -5.3  | -4.9  | -6.8  | -3.9  | -5.8  | -4.9  | -4.4  | -5.3  | -5.8  | -4.9  | -5.5  | -5.6 | -5.4  | -4.5  | 0.9   | -5.6  | -5.6  | -6    | -5.3 | -5.4 | -5.2 | -5.1 | -5.2 | 1.32  |        |
| 903 | -3.9  | -3.8  | -4.1  | -3.9  | -3.8  | -3.9 | -3.8  | -4.1  | -4    | -3.8  | -4.2  | -4    | -3.9  | -3.6  | -3.9  | -3.9  | -3.7  | -4   | -4.3  | -3.9  | -4.2  | -3.9  | -4    | -4.3  | -3.9 | -4.2 | -3.9 | -4   | -4.1 | 0.17  |        |
| 904 | -5.2  | -4    | -3.3  | -2.9  | -4.6  | -5   | -4.2  | -3.5  | -5.9  | -3.1  | -5.1  | -3.9  | -4.4  | -4.1  | -4.6  | -3.6  | -4.9  | -4.1 | -5.4  | -4.8  | -1.3  | -5    | -5.8  | -5.5  | -5.4 | -5.2 | -5.3 | -5.2 | -5.1 | -5.2  | 1.01   |
| 906 | -5.8  | -3.8  | -4.4  | -3.6  | -4.8  | -5.8 | -4.2  | -4.9  | -6.2  | -3.7  | -5.5  | -4    | -4.5  | -5.6  | -5.2  | -4.5  | -4.8  | -5.6 | -5.5  | -5    | -1.6  | -5.7  | -6.1  | -5.6  | -5.9 | -6   | -6   | -5.8 | -6.1 | -5.8  | 1.02   |
| 907 | -5    | -4.7  | -5.1  | -4.9  | -4.8  | -4.8 | -4.6  | -5    | -4.7  | -4.8  | -4.9  | -5.2  | -4.9  | -5.3  | -5.1  | -4.8  | -4.6  | -4.8 | -4.5  | -5.1  | -4.5  | -5.4  | -4.8  | -5    | -4.9 | -4.8 | -5.1 | -4.9 | -5.1 | 0.22  |        |
| 908 | -6    | -4.1  | -4.8  | -4.1  | -5.4  | -4.5 | -5.7  | -5.3  | -7    | -4.1  | -6.1  | -2.5  | -5    | -4.6  | -5.7  | -3.6  | -5.2  | -5.5 | -6.5  | -5.2  | -2.3  | -5.7  | -5.9  | -5.6  | -5.7 | -6.2 | -5.5 | -6.2 | -6   | -6    | 1.09   |
| 909 | -4.6  | -4.3  | -2.7  | -2.7  | -4.7  | -2.5 | -4.8  | -3.6  | -5    | -3.4  | -4.6  | -0.8  | -3.6  | -4    | -4.4  | -2.7  | -4.2  | -4.9 | -6    | -5.3  | -2.6  | -5.7  | -5.9  | -5.4  | -5.4 | -5.8 | -5.6 | -6.3 | -5.9 | -5.5  | 1.33   |
| 910 | -5.8  | -4.2  | -4.4  | -5.1  | -5.6  | -5.6 | -4.2  | -3.9  | -6.1  | -4.5  | -5.5  | -4.8  | -4.4  | -4.5  | -4.7  | -3.2  | -4.5  | -5.6 | -5.9  | -5.4  | -3.6  | -5.8  | -5    | -5.5  | -5.8 | -5.5 | -5.9 | -5.6 | -5.8 | -5.9  | 0.78   |
| 911 | -4.7  | -4.2  | -4.2  | -5.2  | -4.3  | -4.1 | -4.1  | -4.3  | -5.4  | -4.5  | -4.8  | -4.4  | -4.2  | -4.5  | -4.4  | -3.8  | -5    | -4.3 | -4.4  | -4.3  | -3.5  | -5.4  | -4.6  | -5.4  | -4.6 | -4.7 | -4.5 | -4.8 | -4.6 | -4.9  | 0.45   |
| 912 | 58.5  | 64.5  | 75.5  | 104.8 | 81.9  | 68.8 | 78.4  | 77.4  | 56.7  | 126.7 | 61.4  | 107.4 | 90.3  | 92    | 68.2  | 74.3  | 76.9  | 69.6 | 83.1  | 83.9  | 176.4 | 146.3 | 74.5  | 130.4 | 55.9 | 45.4 | 51.1 | 43.9 | 42.5 | 56.8  | 31.05  |
| 913 | -5.6  | -4    | -2.6  | -3.8  | -5.8  | -5.4 | -5.3  | -4.4  | -6.8  | -4.6  | -6.2  | -3.9  | -5.3  | -4.6  | -5.2  | -3.7  | -6.1  | -4.3 | -6.5  | -4.7  | -2.5  | -5.7  | -5.9  | -5.3  | -5.9 | -5.8 | -5.5 | -6   | -5.8 | -5.7  | 1.07   |
| 914 | -5.3  | -3.5  | -2.3  | 0.2   | -4.3  | -3.7 | -2.7  | -3.7  | -4.8  | -2.6  | -2.5  | -1.9  | -1.4  | -3.7  | -4.4  | -4.7  | -4.2  | -3.9 | -3.8  | -3.8  | -6.9  | -4.3  | -5.5  | -5.3  | -6   | -5.2 | -5.4 | -5.5 | -5.6 | -5.7  | 2.46   |
| 915 | -5.6  | -4.5  | -2.3  | -3.8  | -6.5  | -6.4 | -3    | -4    | -7.6  | -0.9  | -5.5  | -4.1  | -4.6  | -6.4  | -4.4  | -4.8  | -2.9  | -6.3 | -7    | -6.3  | 1.8   | -5.2  | -7.3  | -6.7  | -6.6 | -6.4 | -6.6 | -6.3 | -6.9 | -6.3  | 2.08   |
| 916 | -6    | -4.3  | -2.7  | -2.5  | -5.5  | -5.3 | -4.7  | -4.8  | -5.8  | -3.9  | -4.8  | -1.6  | -3.9  | -5    | -5.2  | -4.5  | -4.3  | -5.6 | -5.7  | -5.6  | -3    | -6.2  | -6.7  | -6.2  | -6.3 | -6.4 | -6.1 | -6.2 | -6.2 | -6.2  | 1.28   |
| 917 | -6.5  | -6.7  | -5.8  | -5.6  | -5.8  | -5.8 | -5.5  | -6.8  | -6    | -5.9  | -5.7  | -5.4  | -6.1  | -6.6  | -6.1  | -6.6  | -5.7  | -5.8 | -5.9  | -5.8  | -2.1  | -7.4  | -6.2  | -6.8  | -6.6 | -6.5 | -6.5 | -6.5 | -6.4 | -6.6  | 0.88   |
| 918 | -6.5  | -5.4  | -4.8  | -4.7  | -5.6  | -5.9 | -4.8  | -6.1  | -5.9  | -5.6  | -5.3  | -4.7  | -5.7  | -6.1  | -5.9  | -5.6  | -5.7  | -5.3 | -6.2  | -5.9  | 0.8   | -6.7  | -6.5  | -6.5  | -6.5 | -6.4 | -6.6 | -6.7 | -6.6 | -6.5  | 1.37   |
| 920 |       |       |       |       |       |      |       |       |       |       |       |       |       |       |       |       |       |      |       |       |       |       |       |       |      |      |      |      |      |       | NDV/DI |
| 921 | -4.1  | -4.3  | -4.3  | -4.5  | -4.1  | -3.9 | -4    | -4.2  | -5.1  | -4.8  | -3.9  | -4.1  | -4.1  | -4.5  | -4    | -4    | -4.1  | -3.9 | -4    | -4.1  | -3.4  | -5.2  | -4.1  | -4.9  | -4.1 | -4.2 | -4.1 | -4.4 | -4.3 | -4.2  | 0.37   |
| 922 | 110.9 | 113.8 | 139.7 | 126.1 | 108.5 | 95   | 133.9 | 114.4 | 101.1 | 140.1 | 125.7 | 130.8 | 134.9 | 136.2 | 104.4 | 133.5 | 129.7 | 92.1 | 103.6 | 128.5 | 210.7 | 106.2 | 154.8 | 81.7  | 89.8 | 7.9  | 71.8 | 78.2 | 89.4 | 28.53 |        |
| 923 | -4.3  | -4    | 2.5   | 3.8   | -2.9  | -3.5 | 2.9   | 3.2   | -2.8  | 2.6   | -2.6  | 16.3  | -1.4  | 1.6   | 0.6   | 6.2   | -2.7  | -0.5 | -5.3  | -3.3  | 18.6  | -5.5  | -6.3  | -5.9  | -6.2 | -7.1 | -6.4 | -7.1 | -6.6 | -6.8  | 6.36   |
| 924 | -5.3  | -4.4  | -4.6  | -4.5  | -5.2  | -5.3 | -5.1  | -4.7  | -5.8  | -4.5  | -5.4  | -4.7  | -4.5  | -4.8  | -5.2  | -4.3  | -5    | -5.2 | -5.7  | -5.2  | -3.6  | -5.5  | -5.9  | -5.1  | -5.6 | -5.4 | -5.5 | -5.5 | -5.3 | -5.3  | 0.52   |
| 925 | -5.1  | -4.3  | -4.6  | -4.1  | -4.8  | -4.4 | -5.1  | -4.1  | -5.5  | -4.2  | -4.4  | -4.8  | -4.7  | -5.1  | -4.7  | -4.3  | -4.2  | -5.2 | -5.6  | -5    | -3    | -5    | -4.7  | -5.1  | -5.3 | -5.1 | -5.2 | -5.1 | -4.9 | -5.1  | 0.53   |
| 926 | -5.6  | -5.3  | -5.7  | -5.1  | -5.4  | -5.2 | -4.8  | -5.2  | -7.7  | -5.3  | -5.4  | -5.4  | -5.2  | -6.2  | -5.6  | -5.1  | -5.4  | -4.7 | -5.4  | -5.4  | -3.1  | -6.9  | -6    | -5.5  | -5.6 | -5.7 | -5.5 | -5.9 | -5.9 | -5.9  | 0.74   |
| 927 | -3.2  | 1.1   | 9.6   | 12.6  | -1.3  | -2.4 | -0.2  | 10.5  | -4.8  | 30.1  | -4.1  | 13.9  | 1.1   | 10.5  | 0.7   | 9.1   | 3     | -4.1 | -3.5  | 4.9   | 1.7   | 1.8   | -7.6  | -4.5  | -6.7 | -7.1 | -6.1 | -7.3 | -6.3 | -6.6  | 8.98   |
| 928 | -3.2  | -3.2  | -2.9  | -3.5  | -3.1  | -3.1 | -3.2  | -2.9  | -3    | -3.2  | -3.1  | -3    | -3    | -3.1  | -2.8  | -3.2  | -3.1  | -2.8 | -2.7  | -3.6  | -3.3  | -2.6  | -3.3  | -2.6  | -3.3 | -2.8 | -2.9 | -2.8 | -2.9 | -2.8  | 0.23   |
| 929 | -6    | -5.4  | -5.4  | -4.1  | -6.4  | -4.8 | -5.2  | -6.3  | -7.4  | -5.1  | -5.1  | -6    | -4.7  | -6.4  | -5.6  | -5.4  | -5.4  | -5   | -5.9  | -5.6  | -4.9  | -6.8  | -6.7  | -6.8  | -6.1 | -5.9 | -6.4 | -6.3 | -6   | -6.2  | 0.74   |
| 930 | -4.9  | -4    | -3.9  | -4    | -5.3  | -4.8 | -4.7  | -3.6  | -5    | -4.4  | -4.5  | -4    | -4.3  | -4.8  | -4.2  | -3.7  | -4    | -4.3 | -5.4  | -4.7  | -3    | -5.1  | -5.6  | -5.8  | -5.5 | -5.1 | -5.4 | -5.5 | -5.1 | -5.1  | 0.69   |
| 931 | -5.9  | -3.8  | -3    | -1.8  | -5    | -4.7 | -5.1  | -4.4  | -5.6  | -4.4  | -5.3  | -2.5  | -4.5  | -4.1  | -4.8  | -3.4  | -3.8  | -5.7 | -6.4  | -5.7  | -2.3  | -6.6  | -6.4  | -6.4  | -6.7 | -6.5 | -6.4 | -6.5 | -6.5 | -6.5  | 1.43   |
| 932 | -5.1  | -3.1  | -3.2  | -2.8  | -4.9  | -4.5 | -4    | -1.6  | -5.5  | -2.3  | -5    | -2.1  | -4.7  | -3.9  | -4.7  | -2.8  | -5    | -5.1 | -5.1  | -4.6  | 0.2   | -5.1  | -6    | -4.7  | -5.6 | -5.3 | -5.5 | -5.4 | -5.7 | -5.5  | 1.45   |
| 933 | -5.9  | -5.4  | -4.7  | -5.1  | -5.8  | -5.3 | -5.6  | -5    | -5.6  | -4.6  | -5.9  | -5    | -5    | -5.8  | -5.5  | -5.2  | -5.4  | -5.7 | -5.6  | -5.3  | -4.6  | -6.3  | -6.9  | -5.3  | -5.8 | -5.6 | -5.8 | -5.6 | -5.8 | -5.8  | 0.49   |
| 934 | -5.3  | -4    | -4    | -5    | -4.3  | -4.9 | -4.8  | -4.2  | -5.5  | -4.8  | -4.6  | -4.8  | -4.6  | -4.7  | -4.1  | -4    | -3.6  | -4.4 | -5    | -4.5  | -3.6  | -5.6  | -4.5  | -4.9  | -4.8 | -4.5 | -4.5 | -4.6 | -4.6 | -4.5  | 0.48   |
| 935 | -4.9  | -4.5  | -4.1  | -4.6  | -5.1  | -4.8 | -3.9  | -4.3  | -4.9  | -4.5  | -4.7  | -4.7  | -4.9  | -4.6  | -4.1  | -5    | -5.3  | -4.8 | -2.7  | -5.5  | -5.2  | -5.4  | -4.9  | -5    | -4.9 | -5.2 | -5   | -4.9 | -5.2 | -5    | 0.54   |
| 936 | -4.6  | -4.3  | -5.2  | -4.9  | -4.7  | -4.6 | -4.5  | -4.7  | -5.3  | -4.4  | -5    | -5.2  | -5.3  | -5.3  | -5.1  | -4.3  | -4.6  | -5   | -4.9  | -5.1  | -4.1  | -5.6  | -4.9  | -5.5  | -5.2 | -5.7 | -5.1 | -5.3 | -5.1 | -5.1  | 0.40   |
| 937 | -5.2  | -4.8  | -5.2  | -4.7  | -5.1  | -5   | -4.5  | -4.7  | -5.7  | -5.2  | -5    | -4.1  | -5.4  | -5.3  | -5.1  | -4.4  | -4.9  | -4.9 | -5.5  | -5.3  | -3.7  | -5.4  | -5.9  | -5.4  | -5.9 | -5.7 | -5.9 | -5.7 | -5.8 | -5.8  | 0.55   |
| 938 | -4.5  | -4.1  | -0.1  | -4.6  | -4.7  | -5.3 | -2.7  | -5.3  | -2.6  | -5.5  | -3.6  | -3.7  | -4.2  | -5    | -2.6  | -4.2  | -4.1  | -5   | -3.5  | 4.8   | -3.5  | -6.2  | -5.4  | -5.6  | -5.6 | -5.8 | -7   | -5.6 | -7   | -5.6  | 2.67   |
| 939 | -2.9  | 7.2   | 5     | 11.9  | 5.6   | 2    | 12.2  | 4.6   | -5.5  | 26.2  | -2.7  | 16.7  | 1.5   | 7.5   | -1.3  | 15.7  | -0.9  | -2.2 | -3.3  | -1.5  | 15.9  | 15.7  | -4.9  | -1.5  | -6   | -5.2 | -4.8 | -5.7 | -5.4 | -5.9  | 8.60   |
| 940 | -5    | -4.2  | -4.6  | -5.1  | -4.5  | -4.4 | -5.2  | -4.2  | -5.9  | -4.6  | -4.7  | -4.7  | -4.5  | -4.7  | -4.4  | -4.1  | -4.2  | -4.7 | -4.8  | -5.1  | -2.5  | -4.6  | -5.1  | -4.9  | -5.4 | -4.9 | -5.3 | -5.3 | -5.2 | -5.4  | 0.60   |
| 941 | -5.4  | -4.6  | -4.7  | -5.1  | -5.5  | -5.2 | -4.5  | -5.4  | -6.4  | -4.9  | -5.5  | -5.2  | -4.7  | -5.2  | -5.3  | -4.4  | -4.6  | -5.3 | -5.7  | -5.5  | -4    | -6.4  | -5.7  | -5.4  | -5.7 | -5.8 | -5.6 | -5.5 | -5.6 | -5.4  | 0.54   |
| 942 | -6.9  | -4.6  | 0.9   | -3    | -6.6  | -5.2 | -5.4  | -2.4  | -7.2  | -3.1  | -5.8  | 5.3   | -4.1  | -1.2  | -5.3  | -0.3  | -     |      |       |       |       |       |       |       |      |      |      |      |      |       |        |

|      |       |       |       |       |       |       |       |       |       |       |       |       |       |       |       |       |       |       |       |       |       |       |       |       |      |      |      |       |       |      |       |      |
|------|-------|-------|-------|-------|-------|-------|-------|-------|-------|-------|-------|-------|-------|-------|-------|-------|-------|-------|-------|-------|-------|-------|-------|-------|------|------|------|-------|-------|------|-------|------|
| 983  | -4.5  | -3.7  | -4    | -4.6  | -4.9  | -5.4  | -4.4  | -3.9  | -5.4  | -4.5  | -4.6  | -4    | -4.4  | -4.2  | -4.2  | -3.5  | -3.9  | -4.9  | -4.6  | -4.2  | -3.4  | -4.9  | -4.4  | -4.6  | -4.8 | -4.3 | -4.5 | -4.6  | -4.7  | -4.6 | 0.47  |      |
| 984  | -4.4  | -3.5  | -3.8  | -2.4  | -4.5  | -4.4  | -3.9  | -3.1  | -5.4  | -2.9  | -4.7  | -2.3  | -3.9  | -3.5  | -3.9  | -0.5  | -3.9  | -4.6  | -4.9  | -4.6  | 0.6   | -4.1  | -4.8  | -5.1  | -5.2 | -5.1 | -4.8 | -4.8  | -5.2  | -5   | 1.37  |      |
| 985  | -4.7  | -3    | -3.5  | -2.9  | -4    | -4.1  | -1.3  | -2.6  | -4.7  | -2.8  | -3.5  | 0.6   | -3.8  | -3    | -4.2  | -0.9  | -3.4  | -4.3  | -4.1  | -4.1  | 0     | -4    | -4.6  | -4.9  | -5.5 | -5.4 | -5.5 | -5.3  | -5.5  | -5.7 | 1.59  |      |
| 986  | -5.8  | -5.2  | -4.3  | -4    | -5.6  | -4.8  | -4.4  | -5.5  | -5.6  | -4.5  | -5.3  | -4.9  | -5.2  | -6.2  | -5.1  | -5.2  | -5.7  | -4.9  | -6.1  | -5.1  | -5.9  | -5.1  | -5.9  | -6.8  | -6   | -5.9 | -6   | -6.6  | -6    | -6.3 | 2.18  |      |
| 987  | -4.5  | -3.1  | -1.2  | -0.2  | -4.5  | -3.7  | -3.6  | -2.7  | -5.3  | 2     | -4.5  | 5.8   | -4.6  | -2.8  | -4.1  | 2.9   | -4    | -4.6  | -4.7  | -5    | 6.9   | -3.2  | -6.1  | -5.7  | -6.3 | -5.5 | -5.6 | -5.7  | -5.6  | -6.5 | 3.42  |      |
| 988  | -4.8  | -4.4  | -5    | -4.7  | -4.9  | -4.7  | -4.5  | -4.7  | -4.9  | -4.9  | -4.7  | -4.7  | -4.5  | -5.1  | -4.7  | -4.5  | -4.7  | -4.6  | -4.5  | -2.7  | -4.8  | -4.8  | -5.1  | -5.2  | -4.5 | -4.9 | -4.7 | -4.7  | -5    | 0.42 |       |      |
| 989  | -5.2  | -4.1  | -4.3  | -4    | -4.8  | -5.1  | -4.5  | -4.3  | -6.3  | -4.3  | -5.2  | -4.2  | -4.7  | -4.7  | -4.7  | -5.6  | -3.6  | -4.3  | -5.2  | -5.1  | -5    | -2    | -5.6  | -5.9  | -5.6 | -6.2 | -6.2 | -6.6  | -6.6  | -6.4 | -6.8  | 1.06 |
| 990  | 145.2 | 126.8 | 147.4 | 168.1 | 145   | 146.6 | 157.5 | 128.7 | 140.2 | 150.8 | 137.5 | 150.2 | 124.3 | 129.4 | 143.1 | 127.7 | 130   | 139.8 | 132.8 | 138.3 | 178.5 | 127.7 | 72    | 123.2 | 92   | 68.6 | 95.7 | 102.2 | 102   | 83   | 26.58 |      |
| 991  | -5.1  | -4.7  | -4.7  | -4.8  | -4.9  | -4.6  | -4.7  | -4.8  | -5.6  | -4.7  | -4.9  | -4.7  | -4.8  | -5.2  | -4.9  | -4.5  | -4.8  | -4.6  | -4.8  | -4.5  | -4.6  | -5.1  | -5.1  | -4.9  | -5.2 | -5.4 | -4.7 | -5.2  | -4.9  | -4.9 | -5.1  | 0.26 |
| 992  | -4    | -3.4  | 0     | 1.2   | -3.1  | -3.5  | -2.9  | -2.6  | -4.4  | -0.3  | -3.4  | 9.6   | -3.5  | -3    | -3.4  | 3.1   | -2.4  | -3.9  | -4.1  | -4    | 10.7  | -5.8  | -6    | -5.7  | -6.3 | -5.5 | -5.6 | -6.4  | -5.9  | -6.4 | 4.16  |      |
| 993  | -4.7  | -3.8  | -1.6  | 0.8   | -4.5  | -4    | -2.3  | -2.5  | -5.1  | 1.6   | -4.7  | 4.3   | -4.4  | -4.2  | -5    | 1.1   | -4    | -4.1  | -4.4  | -5    | 15.6  | -3.4  | -6    | -5.7  | -5.6 | -5.5 | -5.3 | -6.1  | -5.8  | -6.5 | 4.50  |      |
| 994  | -5.3  | -4.7  | -5.2  | -5    | -5.1  | -5.1  | -4.4  | -5.2  | -6.5  | -5.6  | -5    | -5    | -5.3  | -5.5  | -5.1  | 4.8   | -5    | -4.8  | -6.4  | -5.1  | 0.3   | -5.8  | -6.4  | -5.9  | -6   | -6.1 | -5.4 | -6.2  | -5.9  | -5.8 | 1.18  |      |
| 995  | -5.5  | -4.9  | -5.5  | -5.1  | -5.4  | -5.6  | -5    | -5.6  | -5.8  | -5.6  | -5.5  | -4.9  | -5.1  | -5.7  | -5.8  | -4.9  | -5.4  | -5.2  | -5.3  | -4.9  | -4.9  | -6.3  | -5.4  | -5.9  | -5.9 | -5.3 | -5.8 | -5.3  | -5.4  | -5.6 | 0.36  |      |
| 996  | 119   | 121   | 139.7 | 145.7 | 132.7 | 126.6 | 123.9 | 122.8 | 126.3 | 139.8 | 129.4 | 156.9 | 129.2 | 131.5 | 113.9 | 127.9 | 137.1 | 114.1 | 110.4 | 162.3 | 129.5 | 79.2  | 121.3 | 75.8  | 73.1 | 85.2 | 78.7 | 79    | 24.62 |      |       |      |
| 997  | -3    | -3.5  | 2.2   | 2.2   | -2    | -2.5  | -2.2  | -0.7  | -4.9  | 1.1   | -2.4  | 11.5  | -2.8  | -1    | -2.6  | 3.5   | -2.1  | -3.5  | -2.2  | -2.9  | 12    | -4.9  | -6.1  | -6.2  | -6.2 | -4.9 | -5.9 | -6.1  | -5.4  | -6.4 | 4.56  |      |
| 998  | -4.5  | -3.2  | -1.7  | -2.5  | -4.4  | -4.2  | -3.5  | -2.8  | -5.3  | -3.4  | -4.5  | -0.5  | -3.9  | -3.8  | -4    | -2.9  | -4.2  | -4.9  | -4.7  | -4.3  | 0     | -4.1  | -4.7  | -4.8  | -5   | -4.8 | -4.8 | -5.1  | -4.9  | -4.9 | 1.30  |      |
| 999  | 3     | 18.4  | 41.8  | 50.8  | 17    | 7.7   | 16.1  | 20.4  | 9.2   | 34.5  | 18.6  | 39.7  | 16.4  | 33    | 20.7  | 18.3  | -0.2  | 16    | 12.8  | 16.8  | 32.3  | 8.3   | -3.3  | 0.2   | -4   | -1.6 | -3.3 | -4    | -2.8  | -5.4 | 15.35 |      |
| 1000 | -2.6  | 2.4   | -0.5  | 6.6   | -4.8  | -3.7  | -1.2  | 18.1  | -4.9  | 8.8   | -2.9  | 0.2   | -2.1  | 3.5   | -4.3  | 9.3   | -3.3  | -3.9  | -4.6  | -3.5  | 10.3  | 3.9   | -5.1  | -2.8  | -6.5 | -6.3 | -6.1 | -6.2  | -6    | -5.6 | 6.09  |      |
| 1001 | -5.5  | -4.3  | -4.9  | -4.9  | -4.8  | -4.4  | -4.6  | -4.4  | -5.3  | -4.2  | -4.7  | -4.9  | -4.9  | -5.2  | -4.6  | -3.9  | -4.7  | -4.6  | -4.9  | -4.8  | 1.3   | -5.8  | -5.2  | -5.5  | -5.6 | -5   | -5.5 | -5.2  | -5.4  | -5.8 | 1.24  |      |
| 1002 | -4.3  | -3.5  | -0.1  | 0.2   | 0.4   | -2.2  | -3.1  | 0.9   | -4    | -1.2  | -3.2  | 7.2   | -3.5  | -1.2  | -3.6  | 4.2   | -3.3  | -4.3  | -4.2  | -4.2  | 10.4  | -3.7  | -6.2  | -5.8  | -6.5 | -5.3 | -5.4 | -6.5  | -6    | -6.7 | 3.96  |      |
| 1003 | -5.1  | -4.7  | -4.7  | -4.5  | -5.2  | -5.3  | -4.5  | -4.6  | -6.6  | -4.4  | -5.1  | -3.9  | -4.4  | -5.3  | -4.6  | -4    | -4.4  | -5.2  | -5.4  | -5.2  | -0.1  | -6.4  | -6    | -5.6  | -6   | -5.8 | -6.4 | -6.5  | -6.3  | -6.4 | 1.23  |      |
| 1004 | 53.9  | 88.6  | 109.7 | 119.9 | 84    | 64.1  | 93.6  | 60.2  | 69.8  | 122.5 | 70.5  | 136.2 | 101.8 | 92    | 69.5  | 96.6  | 75.8  | 68.1  | 60.5  | 68.5  | 43.6  | 44.7  | 8     | 15.5  | 2.5  | 4.6  | 7.9  | 5.2   | 5.6   | 5    | 39.97 |      |
| 1005 | -5.1  | -4.3  | -4.6  | -3.9  | -5.1  | -4.7  | -4.9  | -4.1  | -6.4  | -4.4  | -5.4  | -3.6  | -5    | -4.8  | -5.3  | -4.3  | -4.7  | -4.6  | -5.6  | -4.8  | 1.1   | -4.8  | -5.5  | -5.6  | -5.7 | -5.7 | -6.1 | -5.6  | -5.9  | -5.6 | 1.30  |      |
| 1006 | -5.2  | -4.9  | -5.3  | -5    | -4.5  | -4.7  | -4.7  | -5.3  | -5.3  | -5.2  | -5.2  | -4.4  | -4.6  | -5.1  | -4.8  | -4.4  | -4.7  | -4.9  | -5    | -4.8  | 0.9   | -4.9  | -5.2  | -5.8  | -5.2 | -5.3 | -5.3 | -5.4  | -5.3  | -5.6 | 1.14  |      |
| 1007 | -5.2  | -4.7  | -4.6  | -4.7  | -5.2  | -4.9  | -4.4  | -4.4  | -6.5  | -4.8  | -5.1  | -4.5  | -4.7  | -5.1  | -5.1  | -4.4  | -4.6  | -5.1  | -5.2  | -5.4  | 1.2   | -6.2  | -5.9  | -5.8  | -5.2 | -5.3 | -4.9 | -5.7  | -5.5  | -5.9 | 1.28  |      |
| 1008 | -5.6  | -4.4  | -4.3  | -4    | -5.4  | -4.9  | -4.7  | -4.1  | -6.1  | -4.3  | -5.8  | -3.9  | -5.3  | -5    | -5    | -3.8  | -4.9  | -5.5  | -5.3  | -5.2  | -1.8  | -4.7  | -5.9  | -5.8  | -6.1 | -5.4 | -5.9 | -5.7  | -5.4  | -6.2 | 0.92  |      |
| 1009 | -0.7  | -1.3  | 0.2   | 11    | 0.7   | 0.2   | -1.1  | 2.8   | -2.8  | 1.8   | -1.3  | 13.1  | 1.6   | 0.1   | 3.5   | 6.2   | 1.2   | -1    | -2.5  | 0.1   | 14.2  | -4.6  | -6.7  | -6.1  | -5   | -5.5 | -5   | -5.7  | -5.5  | -5.6 | 5.44  |      |
| 1010 | -5    | -4.5  | -4.8  | -3.8  | -4.7  | -4.9  | -4.9  | -4.4  | -6.1  | -4.1  | -4.8  | -3.9  | -4.6  | -4.7  | -4.8  | -4.2  | -4.5  | -5.3  | -5.4  | -4.6  | 0.8   | -4.8  | -5.4  | -5.5  | -5.6 | -5.5 | -6   | -5.7  | -5.8  | -5.8 | 1.22  |      |
| 1011 | -2.1  | -0.7  | -0.8  | 6.1   | 0.2   | 0.2   | 3.5   | 0.5   | -2.1  | 5     | 1.7   | 5.8   | 0.5   | 0.8   | -1.8  | 3.1   | 1.1   | -0.7  | -2.5  | 0.4   | 18.3  | -4.8  | -6.8  | -6.4  | -5.2 | -5.5 | -5.1 | -5.4  | -5.3  | -5.2 | 5.08  |      |
| 1012 | -5.5  | -4.2  | -4.4  | -5.2  | -4.5  | -4.1  | -5    | -4.2  | -5.6  | -4.3  | -4.8  | -4.5  | -4.2  | -4.6  | -4.6  | -3.9  | -4    | -4.4  | -4.8  | -4.8  | -3.9  | -5.6  | -4.8  | -4.9  | -4.9 | -4.7 | -4.9 | -4.7  | -4.8  | -4.9 | 0.46  |      |
| 1013 | -3    | -2.3  | -1.5  | -2.5  | -2.3  | -2.1  | -2.1  | -0.1  | -2.5  | 0.2   | -2    | 2.2   | -2.5  | 1.1   | -3.6  | 2.3   | -2.8  | -4.2  | -3.8  | -3.4  | 14.9  | -4    | -4.4  | -4.1  | -4.6 | -5.3 | -4.5 | -5    | -4.7  | -4.8 | 3.88  |      |
| 1014 | -4.8  | -4.3  | -4.7  | -4.2  | -4.7  | -4.7  | -4.3  | -4.7  | -4.9  | -5    | -4.7  | -4.9  | -5.1  | -5.1  | -4.7  | -4    | -4.6  | -4.4  | -5.4  | -5.2  | 1.5   | -5    | -5.7  | -6    | -5.2 | -5.3 | -4.9 | -5.1  | -5.1  | -5.1 | 1.24  |      |
| 1015 | -5.2  | -4    | -4.2  | -4.7  | -4.7  | -4.6  | -4    | -4    | -6.2  | -3.2  | -5.7  | -3.1  | -4.2  | -4.8  | -4.2  | -3.3  | -4.9  | -4.4  | -5.4  | -5.7  | 0.6   | -5.2  | -5.6  | -5.6  | -6.7 | -5.6 | -6   | -6.7  | -6.2  | -6.6 | 1.44  |      |
| 1016 | -4.9  | -4.3  | -4.3  | -3.9  | -4.8  | -4.4  | -4.5  | -4.5  | -5.4  | -4.4  | -5.3  | -3.2  | -4.9  | -5.4  | -4.8  | -3.9  | -4.6  | -5    | -5.5  | -4.7  | -2.1  | -5    | -5.6  | -5.2  | -5.4 | -5.3 | -5.4 | -5.4  | -5.1  | -5.2 | 0.75  |      |
| 1017 | 25.8  | 25.5  | 36.1  | 55.5  | 33.5  | 28.6  | 35.2  | 21.9  | 25.1  | 55.1  | 31.7  | 74.3  | 46.2  | 49.4  | 34.5  | 42.4  | 25.7  | 31.3  | 25.3  | 34.9  | 46.2  | 15.7  | -7.1  | 1.2   | -2.4 | 0.1  | -3.9 | -2.3  | -2.1  | -1.4 | 20.92 |      |
| 1018 | -4.3  | -4.2  | -3.8  | -3.9  | -4.7  | -4.6  | -3.8  | -4.1  | -5.4  | -4.4  | -5    | -4.4  | -5    | -4.4  | -4.7  | -4.2  | -4.2  | -5.1  | -5    | -5.1  | -1.5  | -4.9  | -5.6  | -5.5  | -5.4 | -4.9 | -5.4 | -5.2  | -5.7  | -5.8 | 0.83  |      |
| 1019 | -4.5  | -3.3  | -0.9  | 1.5   | -3.1  | -2.5  | -2.8  | -2.2  | -5.3  | 0.1   | -4    | 8.3   | -3.3  | -3    | -2.5  | -4.1  | -3.9  | -4.3  | 11.1  | -3.6  | -6.6  | -5.8  | -6.2  | -5.9  | -5.6 | -6.3 | -5.5 | -6.5  | -6.5  | -6.4 | 4.14  |      |
| 1020 | -5.3  | -4.2  | -4.3  | -2.3  | -4.9  | -4.6  | -4.4  | -4.1  | -6    | -4.1  | -4.7  | -3.8  | -4.4  | -5    | -5    | -3.4  | -4.4  | -4.7  | -5.3  | -4.3  | 4     | -5.1  | -6    | -5.4  | -6.5 | -5.7 | -5.2 | -6.2  | -5.7  | -6.1 | 1.85  |      |
| 1021 | -5.1  | -4.3  | -4.3  | -4.4  | -5.1  | -4.6  | -4.5  | -4.6  | -6.6  | -4.5  | -5.2  | -4    | -4.3  | -4.9  | -5.6  | -3.9  | -4.4  | -5    | -5.4  | -5    | -0.1  | -6.4  | -5.8  | -5.3  | -6   | -5.8 | -6.4 | -6.5  | -6.2  | -6.4 | 1.24  |      |
| 1022 | -5.2  | -4.5  | -4.4  | -4.4  | -5.1  | -5.2  | -4.5  | -4.7  | -6.8  | -4.7  | -5.1  | -4.7  | -4.6  | -5.2  | -4.6  | -4.3  | -4.7  | -5.3  | -5.7  | -5.1  | -1.4  | -6.5  | -5.9  | -5.7  | -6   | -6   | -6.5 | -6.5  | -6.4  | -6.5 | 1.06  |      |
| 1023 | -3.9  | -3    | -3.4  | -2.7  | -2.7  | -3    | -2.8  | -3.1  | -4.9  | -4.4  | -4.4  | -2.9  | -2.9  | -4    | -3.7  | -2.2  | -3.3  | -4.2  | -4.3  | -4.1  | 0.3   | -3.3  | -4.7  | -4.4  | -5.4 | -4.8 | -5.4 | -4.7  | -4.7  | -5.4 | 1.18  |      |
| 1024 | -5.5  | -2.3  | 2.2   | 5     | -4.8  | -5.3  | -3.9  | -2.7  | -6.6  | 3     | -5.1  | -0.2  | -3.6  | -2.1  | -3.5  | 1.8   | -5.3  | -5.3  | -5.2  | -3.9  | 3.4   | -4.8  | -6.3  | -5.7  | -6.5 | -6.1 | -6.3 | -6.1  | -6.4  | -6.3 | 3.37  |      |
| 1025 | -4.3  | -3.5  | -3.1  | -2.9  | -4.5  | -4.8  | -4.2  | -3.1  | -5.5  | -2.8  | -4.8  | -2.8  | -5.2  | -4.4  | -4.2  | -3.6  | -4.1  | -4.3  | -5.6  | -4.7  | 2.4   | -4.4  | -5.5  | -5    | -5.5 | -5.1 | -5.2 | -5.3  | -5.2  | -5.2 | 1.57  |      |
| 1026 | -4.7  | -3.5  | -2.6  | -3.3  | -5.4  | -4.2  | -3.5  | -3.7  | -4.8  | -3.4  | -5.3  | -2.2  | -2.9  | -5.3  | -3.6  | -1.7  | -4.3  | -4.9  | -5.8  | -4.5  | 2.1   | -5.8  | -5.8  | -5.9  | -6.4 | -5.6 | -5.8 | -6.1  | -6.1  | -6   | 1.78  |      |
| 1027 | -5.1  | 1.7   | 4.5   | 5.9   | -5.1  | -2.1  | 3.1   | 0.9   | -5    | 2     | -4.7  | 6.1   | -1.7  | 1.3   | -4.3  | 9.9   | -4.8  | -4.5  | -1.3  | -1.9  | 6.8   | -3.4  | -5.2  | -5    | -5.6 | -6   | -5.3 | -5.6  | -5.3  | -5.5 | 4.58  |      |
| 1028 | -5.1  | -3.7  | -4.2  | -2.4  | -4.6  | -5    | 6.1   | -3.5  | -6.2  | -2.5  | -5.8  | -2.9  | -4.3  | -4.7  | -4.3  | -2    | -4    | -4.7  | -5    | -5.2  | 1.1   | -4.9  | -5.6  | -5.1  | -6.4 | -4.9 | -5.3 | -6.4  | -5.4  | -6.4 | 1.33  |      |
| 1029 | -4.9  | -3.9  | -3.9  | -3.6  | -4.7  | -4.6  | -4.9  | -4    | -5.9  | -3.8  | -4.6  | -4.7  | -4.6  | -4.7  | -4.8  | -2.4  | -4.4  | -4.9  | -5.3  | -5.4  | 1.7   | -5    | -5.4  | -5.3  | -5.7 | -5.3 | -5.6 | -5.5  | -5.5  | -5.4 | 1.40  |      |
| 1030 | -4.7  | -4.3  | -2.5  | -3.1  | -4.7  | -5.1  | -4.7  | -1.9  | -4.7  | -3.1  | -4.4  | -3.7  | -4.1  | -4.2  | -4.6  | -2.4  | -     |       |       |       |       |       |       |       |      |      |      |       |       |      |       |      |

|      |       |       |       |       |       |       |       |       |       |       |       |       |       |       |       |       |       |       |       |       |       |       |       |       |       |       |       |       |       |       |       |
|------|-------|-------|-------|-------|-------|-------|-------|-------|-------|-------|-------|-------|-------|-------|-------|-------|-------|-------|-------|-------|-------|-------|-------|-------|-------|-------|-------|-------|-------|-------|-------|
| 1072 | -5.3  | -4.4  | -4.9  | -3.8  | -5.3  | -5.3  | -4.8  | -4.5  | -5.5  | -3.6  | -5.2  | -4.3  | -4.4  | -5    | -4.5  | -4    | -4.5  | -5.2  | -5    | -5.3  | -3.8  | -4.9  | -5.8  | -5.7  | -6    | -5.6  | -5.5  | -5.7  | -5.4  | -5.7  | 0.65  |
| 1073 | -5.1  | -4    | -4.3  | -5.4  | -4.3  | -5.2  | -4.3  | -4    | -5.1  | -5.1  | -4.7  | -4.4  | -4.4  | -4.5  | -4.7  | -4.2  | -4.1  | -4.6  | -4.4  | -4.4  | -3.8  | -5.6  | -4.6  | -5    | -4.9  | -4.7  | -4.7  | -4.8  | -4.6  | -4.6  | 0.43  |
| 1074 | -4.8  | -2.8  | -2.3  | 1.1   | -2.9  | -3    | -4.3  | -3    | -4.3  | 1.7   | -3.9  | 3.8   | -3    | -3.8  | -3.5  | -2.8  | -3.9  | -4    | -3.6  | 7.5   | -2.6  | -5    | -4.9  | -5.6  | -4.8  | -5    | -4.9  | -4.6  | -4.9  | -2.87 | 2.87  |
| 1075 | 122.9 | 111.3 | 138.6 | 142.6 | 147.3 | 134.3 | 145.2 | 133.5 | 126.9 | 176.9 | 124   | 177.5 | 128.4 | 143.6 | 110   | 133.8 | 104.5 | 135.6 | 117.4 | 122.9 | 155.5 | 122.8 | 76.6  | 142.7 | 47.6  | 54.7  | 50.8  | 44.4  | 48.6  | 44.1  | 39.24 |
| 1076 | -2.8  | -1.7  | -1    | -1.5  | -1.7  | -4.3  | -0.4  | -2.5  | -3    | -1.3  | -4.2  | -0.5  | -2.1  | -2.3  | -2.7  | 1.5   | -2.9  | -4.2  | -4.4  | -3    | 1.1   | -2.7  | -4.8  | -4.1  | -5.3  | -4.8  | -4.4  | -5.2  | -4.6  | -5.1  | 1.83  |
| 1077 | -3.7  | -3.2  | -3.1  | -3.8  | -3.2  | -3.2  | -3.5  | -3    | -3.6  | -3.5  | -3.4  | -3.3  | -3.6  | -3.2  | -3.3  | -3.3  | -3.5  | -3.1  | -3.4  | -3.2  | -3.6  | -3.6  | -3    | -3.7  | -3    | -2.9  | -3.1  | -3.1  | -3.1  | -3    | 0.25  |
| 1078 | -4.9  | -4    | -0.5  | -1.3  | -4.5  | -4.6  | -3.3  | -2.6  | -5.8  | -1.4  | -4.3  | 5.5   | -4.6  | -2.9  | -5.3  | 1.3   | -3.7  | -5    | -4.9  | 4.1   | -3.6  | -6.5  | -5.7  | -6    | -5.4  | -5.6  | -5.9  | -5.7  | -6.3  | 2.93  |       |
| 1079 | 130.4 | 123.6 | 125.2 | 166.8 | 147.8 | 125.5 | 125.3 | 130.2 | 136.5 | 163.4 | 122.4 | 160.3 | 155.2 | 148.8 | 134.8 | 129.2 | 143.2 | 147.2 | 126   | 132.5 | 158   | 152.3 | 105.5 | 131.3 | 106.6 | 105.2 | 109.7 | 111.1 | 106.5 | 109.2 | 18.62 |
| 1080 | -4.2  | -4    | -4.1  | 4.4   | -4.9  | -4.2  | -3.9  | 4.4   | -5.4  | -3.9  | -5.1  | 4.3   | -4.8  | -4.6  | -4.9  | -4.1  | -4.3  | -4.7  | -5.2  | -4.5  | -4.1  | -4.6  | -5.3  | -4.6  | -5.2  | -5    | -4.8  | -5.2  | -4.9  | -5    | 0.45  |
| 1081 | -4.6  | -4.6  | -5.3  | -4.5  | -4.7  | -4.5  | -4.6  | -4.8  | -4.7  | -4.9  | -4.6  | -4.9  | -4.6  | -5.2  | -4.7  | -4.5  | -4.6  | -4.5  | -4.7  | -4.4  | -4.4  | -5    | -4.7  | -5    | -4.7  | -4.4  | -4.7  | -4.4  | -4.6  | -4.6  | 0.22  |
| 1082 | 0.9   | 0     | 7.8   | 12.3  | 2.2   | 2.7   | 3.7   | -0.1  | 1.1   | 5     | 2.6   | 6.5   | 1.9   | 4.6   | 2.7   | 7.6   | 0.6   | -2.5  | -1.3  | 0.4   | 3.7   | -5.3  | -4.8  | -4.4  | -4.5  | -4.5  | -4.4  | -4.4  | -4.4  | -4.4  | 4.61  |
| 1083 | 8.9   | 14.7  | 27.9  | 18.6  | 1.8   | 4.6   | 22.6  | 34    | 15.1  | 44.3  | 16    | 40.2  | 9.5   | 15.9  | 26.5  | 26.3  | 16.4  | 3.7   | -0.9  | 1.5   | 38.6  | 6.1   | -5.5  | 11    | -3.9  | -5.9  | -3.4  | -5.6  | -6.4  | -5.5  | 15.02 |
| 1084 | -5.2  | -5    | -5    | -5.2  | -5.2  | -5.2  | -4.5  | -5.3  | -5.4  | -5.2  | -5.1  | -4.9  | -5.2  | -5.6  | -5.1  | -5.1  | -5.2  | -4.8  | -5.4  | -4.9  | -5.2  | -6    | -5.6  | -5.7  | -5    | -5.2  | -5.5  | -5.2  | -5.4  | -5.3  | 0.29  |
| 1085 | -5.3  | -5.2  | -5.6  | -5.2  | -5.7  | -5.2  | -5    | -5.4  | -5.2  | -5.4  | -5.4  | -4.9  | -4.8  | -5.7  | -5.6  | -5    | -5.4  | -5.3  | -5.1  | -5.1  | -4.7  | -6.2  | -5.2  | -5.8  | -5.6  | -5.1  | -5.4  | -5.4  | -5.3  | -5.4  | 0.31  |
| 1086 | -3.7  | -3.1  | 0.4   | 0.2   | -1.7  | -2.6  | -2.1  | -2.7  | -3.9  | -1.7  | -4.3  | 1.3   | -4.2  | -3    | -4.2  | -0.3  | -1.6  | -4.1  | -4.4  | -3    | 1.8   | -2.8  | -5.9  | -4.1  | -4.8  | -5.3  | -5.2  | -4.8  | -4.7  | -5.1  | 2.03  |
| 1087 | -6    | -5.8  | -6    | -5.7  | -5.8  | -5.9  | -5.6  | -6.1  | -5.8  | -5.8  | -5.5  | -6.1  | -5.5  | -6.5  | -5.8  | -5.8  | -5.6  | -5.9  | -5.8  | -5.5  | -2    | -5.1  | -6.1  | -6.2  | -5.8  | -5.7  | -5.8  | -5.9  | -5.9  | -6.1  | 0.75  |
| 1088 | -4.9  | -4    | -4.5  | -4.2  | -5    | -4.3  | -4    | -4.8  | -5.8  | -4.2  | -4.5  | -4.2  | -4.3  | -4.6  | -4.2  | -4    | -3.8  | -4.8  | -5    | -4.4  | -4.3  | -4.8  | -5.4  | -5    | -4.8  | -5.3  | -4.9  | -5.2  | -5.1  | -5    | 0.48  |
| 1089 | -5.4  | -5.3  | -5.3  | -5.4  | -5.3  | -5    | -5.1  | -5.7  | -5.3  | -5.6  | -5.3  | -5.2  | -4.9  | -5.7  | -5.5  | -5.4  | -5.3  | -4.9  | -5.4  | -5.1  | -3.5  | -6.5  | -5.3  | -5.9  | -5.4  | -5.2  | -5.4  | -5.4  | -5.4  | -5.4  | 0.46  |
| 1090 | -5.6  | -5.6  | -4.8  | -5.1  | -5.3  | -5.1  | -5.1  | -5.8  | -5.2  | -5.3  | -5    | -4.8  | -5    | -5.8  | -5.2  | -5.6  | -5.2  | -5.2  | -5.5  | -5.4  | 0.8   | -5.9  | -5.4  | -5.6  | -5.9  | -5.5  | -5.7  | -5.7  | -5.5  | -6    | 1.18  |
| 1091 | -5.2  | -4.9  | -4.6  | -4.6  | -4.7  | -4.9  | -4.6  | -5.1  | -5    | -5.1  | -4.8  | -4.5  | -4.6  | -5.4  | -4.8  | -5.1  | -4.8  | -4.4  | -5.1  | -4.7  | -3    | -5.4  | -5.4  | -5.7  | -5.1  | -5.2  | -5.1  | -5.3  | -5.2  | -5.2  | 0.48  |
| 1092 | -6    | -5.8  | -6.1  | -5.8  | -5.8  | -5.8  | -5.6  | -6.2  | -6.1  | -6.1  | -5.6  | -6.3  | -5.5  | -6.4  | -6.1  | -5.8  | -5.7  | -5.8  | -5.7  | -5.7  | -1.7  | -5.2  | -6    | -6.3  | -6.3  | -5.7  | -6    | -6    | -5.9  | -6.2  | 0.82  |
| 1093 | -3.3  | -3.3  | -3.5  | -3.4  | -3.2  | -3.2  | -3.6  | -3.1  | -3.7  | -3.3  | -3.3  | -3.4  | -3.5  | -3.6  | -3.3  | -3.3  | -3.3  | -3.2  | -3.1  | -3    | -3.8  | -3.8  | -3.4  | -4.3  | -3.5  | -3.2  | -3.3  | -3.2  | -3.2  | -3.3  | 0.26  |
| 1094 | -5.5  | -5.6  | -4.6  | -4.8  | -5.6  | -5.4  | -4.5  | -5.4  | -5.5  | -5.5  | -5    | -4.6  | -4.8  | -5.6  | -5.2  | -5.5  | -5.2  | -5.3  | -5.5  | -5.4  | -3.2  | -6.5  | -5.9  | -5.9  | -5.8  | -6    | -6    | -5.9  | -6.1  | -5.9  | 0.63  |
| 1095 | -4.4  | -4    | -4.6  | -4.5  | -4.2  | -4.3  | -3.8  | -4    | -4.2  | -4.6  | -3.9  | -4.2  | -4.1  | -4.5  | -4.2  | -4    | -4.3  | -4    | -4.2  | -3.9  | -4    | -4.3  | -4    | -4.5  | -4.5  | -4.2  | -4.4  | -4.1  | -4.3  | -4.4  | 0.22  |
| 1096 | -4.7  | -4.4  | -5    | -4.6  | -4.8  | -4.5  | -4.7  | -4.6  | -4.9  | -4.7  | -5    | -4.8  | -5    | -5.3  | -4.6  | -4.5  | -4.8  | -4.7  | -4.7  | -4.5  | -3.5  | -4.8  | -4.9  | -4.8  | -5.1  | -4.4  | -4.8  | -4.6  | -4.6  | -4.9  | 0.31  |
| 1097 | -4.6  | -4.3  | -4.2  | -4.3  | -4.4  | -4.1  | -4.4  | -4.5  | -5.9  | -4.3  | -4.5  | -4.4  | -4.3  | -4.8  | -4.7  | -3.9  | -4    | -4.4  | -4.5  | -4.5  | -2.7  | -4.5  | -4.5  | -5.2  | -4.3  | -4.5  | -5    | -5.2  | -4.6  | -5    | 0.52  |
| 1098 | -5.3  | -5.2  | -4.8  | -4.9  | -4.6  | -4.9  | -4.6  | -5.4  | -5    | -4.9  | -4.5  | -4.6  | -4.7  | -5.4  | -4.8  | -5    | -4.6  | -4.7  | -5.1  | -5.1  | -1.8  | -6.2  | -5.5  | -6.1  | -5    | -5.1  | -5.1  | -5.5  | -5.3  | -5.4  | 0.73  |
| 1099 | -5.3  | -4.9  | -4.4  | -4.3  | -4.8  | -5    | -3.8  | -4.9  | -4.6  | -4.8  | -4.6  | -4.9  | -4.1  | -4.1  | -5    | -5    | -4.4  | -4.6  | -5    | -4.9  | -3.6  | -5.8  | -5.4  | -5.6  | -5.5  | -5.1  | -5.6  | -5.1  | -5.4  | -5.4  | 0.54  |
| 1100 | -5.7  | -5.5  | -5.4  | -4.8  | -5.3  | -5.2  | -4.7  | -5.5  | -5.2  | -5.4  | -5.3  | -4.7  | -5.3  | -5.5  | -5.1  | -5.5  | -5.1  | -5.3  | -5.6  | -5.2  | -2.9  | -6.1  | -5.9  | -6    | -5.8  | -5.6  | -5.8  | -5.6  | -5.8  | -5.9  | 0.59  |
| 1101 | -5.1  | -4.9  | -4.6  | -4.6  | -4.7  | -4.8  | -4.2  | -5    | -4.8  | -4.9  | -4.6  | -4.7  | -4.7  | -5.3  | -4.5  | -5    | -4.4  | -4.7  | -5.3  | -4.6  | -1.6  | -6    | -5.7  | -5.6  | -5.2  | -5.2  | -5    | -5.5  | -5.3  | -5.4  | 0.74  |
| 1102 | -5.7  | -5.9  | -5.4  | -4.9  | -5.5  | -5.6  | -5.3  | -5.8  | -6.1  | -5.5  | -5.3  | -4.8  | -5.4  | -5.9  | -5.5  | -5.6  | -5.4  | -5.5  | -5.6  | -5.4  | -5.5  | -2.5  | -6.8  | -5.9  | -6.5  | -5.9  | -6    | -6.2  | -5.9  | -6.2  | 0.73  |
| 1103 | -5.5  | -5.5  | -5.6  | -5.2  | -5.2  | -5.2  | -4.8  | -6    | -5    | -5.5  | -5.1  | -5.5  | -4.8  | -5.8  | -5.4  | -5.5  | -5.2  | -5.1  | -5.3  | -4.8  | -3.9  | -6    | -5.5  | -5.6  | -5.8  | -5.3  | -5.5  | -5.3  | -5.4  | -5.6  | 0.41  |
| 1104 | -5.5  | -5.6  | -5    | -4.6  | -5.3  | -5.3  | -4.8  | -5.5  | -4.9  | -5.3  | -4.9  | -4.4  | -4.9  | -5.6  | -5.2  | -5.2  | -5    | -5.5  | -5.1  | -2.5  | -6.4  | -5.7  | -5.8  | -5.5  | -5.5  | -5.4  | -5.8  | -5.6  | -5.8  | -0.66 |       |
| 1105 | -3.9  | -3.7  | -3.7  | -4    | -3.8  | -3.8  | -3.7  | -3.7  | -3.7  | -3.8  | -3.7  | -3.6  | -3.8  | -4.2  | -3.9  | -3.8  | -3.9  | -3.7  | -3.9  | -3.8  | -3.9  | -4    | -3.8  | -4.1  | -4    | -3.8  | -3.9  | -3.7  | -3.9  | -4    | 0.14  |
| 1106 | -4.4  | -4.3  | -4.4  | -4.2  | -4.3  | -4.6  | -3.9  | -4.7  | -4.3  | -4.2  | -4.5  | -4    | -3.9  | -4.7  | -4.6  | -4.2  | -4.1  | -4.1  | -4.2  | -3.9  | -4.1  | -5.1  | -4.6  | -4.8  | -4.2  | -4.7  | -4.4  | -4.3  | -4.5  | 0.29  |       |
| 1107 | -4.1  | -3.8  | -4.5  | -4.2  | -4.2  | -4.3  | -4    | -4.1  | -4.2  | -4.2  | -4.1  | -4.4  | -4.1  | -4.6  | -4.3  | -3.9  | -4.1  | -4    | -4.1  | -4    | -5    | -4    | -4.4  | -4    | -4.3  | -4    | -4.1  | -4.1  | -4    | -4.1  | 0.23  |
| 1108 | -6.1  | -5.3  | -5.2  | -4.7  | -5.4  | -5.4  | -5.2  | -6.3  | -5.8  | -5.8  | -5    | -5.1  | -4.9  | -5.8  | -5.2  | -5.5  | -5.5  | -5.4  | -6.2  | -5.4  | -1    | -6    | -6.8  | -5.9  | -6.1  | -6.1  | -6    | -6.2  | -6    | -6.2  | 0.98  |
| 1109 | -5.9  | -4.8  | -3    | -4.1  | -5.3  | -5    | -4.5  | -4.6  | -5.5  | -4.9  | -4.5  | -4.2  | -4.8  | -4.4  | -5    | -5    | -4    | -5    | -5.3  | -4.8  | -1.1  | -5.4  | -5.6  | -5.4  | -6    | -5.6  | -5.7  | -5.8  | -5.6  | -5.9  | 0.98  |
| 1110 | -5.5  | -4.4  | -3.9  | -4.1  | -4.8  | -4.8  | -4.2  | -4.3  | -4.7  | -4.5  | -4.6  | -4.2  | -4    | -4.8  | -4.8  | -4.6  | -4.1  | -4.7  | -5.2  | -4.7  | -2.5  | -5.6  | -5.3  | -5.4  | -5.4  | -5.3  | -5.3  | -5.2  | -5.5  | -5.5  | 0.66  |
| 1111 | -5.3  | -4.9  | -4.7  | -4.8  | -5    | -4.8  | -4.9  | -5.3  | -5.2  | -4.8  | -5.1  | -4.6  | -4.8  | -5.3  | -5.2  | -4.7  | -4.8  | -5    | -5.1  | -4.9  | -3.9  | -6.2  | -5.2  | -5.5  | -5.1  | -5.2  | -5.1  | -5.4  | -5    | -5.4  | 0.38  |
| 1112 | -5.4  | -1.4  | 0.9   | 0.7   | -4.4  | -4.8  | -2.3  | 1     | -6.1  | 2.4   | -4.8  | 7     | -4.3  | 3.3   | -5.3  | 1.3   | -5.2  | -4    | -4.9  | -5.2  | -1.8  | -5.5  | -6.2  | -5.7  | -6.7  | -6.6  | -6.6  | -6.9  | -6.8  | -6.8  | 3.64  |
| 1113 | -5.1  | -4.6  | -4.5  | -5.1  | -5.1  | -4.8  | -5.1  | -4.8  | -5    | -4.6  | -4.8  | -4.4  | -5    | -5.2  | -4.1  | -4.3  | -4.5  | -5    | -4.5  | -4.4  | -5.5  | -5.5  | -5.5  | -5.2  | -5.1  | -5    | -4.3  | -5    | -5    | -5.2  | 0.35  |
| 1114 | -5.9  | -5.8  | -5.5  | -5.5  | -5.5  | -5.6  | -5.9  | -6    | -5.6  | -6.7  | -6    | -5.9  | -5.4  | -6.5  | -6.3  | -5.5  | -5.9  | -6    | -6.3  | -5.6  | -3.8  | -6.5  | -6.4  | -6.2  | -5.8  | -5.7  | -6.2  | -6    | -5.9  | -5.8  | 0.52  |
| 1115 | -5    | -5    | -4.5  | -4.4  | -4.6  | -4.5  | -4.5  | -5.4  | -5    | -5    | -4.6  | -4.4  | -4.3  | -5.6  | -4.7  | -4.8  | -4.7  | -4.7  | -5.2  | -5.2  | -2.2  | -6.2  | -5.5  | -5.7  | -5.1  | -5.3  | -5.3  | -5.6  | -5.2  | -5.5  | 0.69  |
| 1116 | -2.3  | -2.5  | 0.2   | 2.7   | -1.3  | -2.7  | -0.9  | -2.9  | -0.1  | 4.2   | 1.3   | 2.6   | -3.1  | -1.9  | 0     | 0.8   | -2.5  | -3.1  | -3.3  | -3.2  | -1.9  | -4    | -5.7  | -4.4  | -5    | -4.7  | -4.3  | -4.4  | -4.5  | -4.8  | 0.53  |
| 1117 | -4.8  | -4.4  | -5.2  | -4.5  | -5.3  | -5.2  | -4.7  | -4.8  | -5    | -4.8  | -5.1  | -4.8  | -5.2  | -5.1  | -4.8  | -4.7  | -4.7  | -5    | -5.2  | -4.9  | -2.3  | -5.1  | -5.2  | -5.1  | -5.1  | -4.8  | -5.2  | -4.8  | -5    | -5.1  | 0.51  |
| 1118 | -6    | -5.6  | -5    | -5.1  | -5.1  | -5.3  | -4.5  | -5.6  | -5.5  | -5.1  | -5.3  | -5.4  | -4.9  | -5.8  | -5.3  | -5.5  | -5.1  | -5.2  | -5.5  | -5.4  | -2.9  | -5.8  | -6.3  | -5.9  | -6    | -5.6  | -5.5  | -5.9  | -5.9  | -6    | 0.62  |
| 1119 | -4.8  | -4.5  | -4.4  | -4.4  | -4.4  | -4.3  | -4.1  | -4.8  | -4.3  | -4.3  | -4.4  | -4    | -4.5  | -4.7  | -4.5  | -4.9  | -4.4  | -4.2  | -4.8  | -4.3  | -4.3  | -5.3  | -4.7  | -4.6  | -4.7  | -4.7  | -4.6  | -4.8  |       |       |       |

|      |       |       |       |       |       |       |       |       |       |       |       |       |       |       |       |       |       |       |       |       |       |      |      |      |      |      |      |      |      |      |       |      |
|------|-------|-------|-------|-------|-------|-------|-------|-------|-------|-------|-------|-------|-------|-------|-------|-------|-------|-------|-------|-------|-------|------|------|------|------|------|------|------|------|------|-------|------|
| 1161 | -4.9  | -4.2  | -4.2  | -5.4  | -4.9  | -4.6  | -5.1  | -4.3  | -5.3  | -4    | -4.9  | -4.4  | -5.2  | -4.7  | -5    | -3.9  | -4.5  | -4.9  | -4.9  | -4.3  | -4.3  | -5.3 | -5.3 | -4.9 | -5   | -5   | -5   | -5.2 | -5   | -5   | 0.42  |      |
| 1162 | -4.9  | -4.6  | -4.8  | -4.5  | -4.7  | -4.4  | -4.2  | -4.8  | -5.4  | -4.7  | -4.6  | -4.4  | -4.5  | -5.1  | -4.9  | -4.5  | -4.6  | -4.4  | -4.7  | -4.5  | -2.8  | -5.7 | -4.6 | -5.4 | -4.9 | -5   | -5.1 | -4.9 | -5.1 | -5   | 0.50  |      |
| 1163 | -5.3  | -4.4  | -4.8  | -5.1  | -5.4  | -5.3  | -4.1  | -4.5  | -5.6  | -4.4  | -4.6  | -4.7  | -4.6  | -5.3  | -4.5  | -4.3  | -4.8  | -5.1  | -5.4  | -5    | -5    | -5.6 | -4.9 | -5.1 | -5.2 | -5.1 | -5.2 | -5.4 | -5.4 | -5.4 | 0.41  |      |
| 1164 | -5.9  | -4.7  | -4.7  | -4.9  | -5.6  | -5.5  | -5.1  | -4.4  | -6    | -4.8  | -5.7  | -3.5  | -5.4  | -5.5  | -5.3  | -3.7  | -4.6  | -5.6  | -5.8  | -6    | -4.6  | -5.8 | -6.2 | -5.7 | -6.4 | -5.7 | -5.9 | -5.8 | -5.8 | -6.1 | 0.71  |      |
| 1165 | -5.4  | -4.8  | -4.3  | -4.7  | -5.6  | -5    | -4.4  | -5.4  | -5.7  | -4.8  | -5.3  | -4.4  | -4.8  | -5.3  | -4.7  | -4.5  | -5.2  | -5.4  | -5.1  | -2.3  | -5.6  | -5.5 | -5.4 | -5.2 | -5.4 | -5.4 | -5.2 | -5.3 | -5.5 | 0.65 |       |      |
| 1166 | -5.4  | -4.6  | -4.7  | -4    | -5.3  | -5.2  | -4.7  | -4.8  | -5.5  | -4.3  | -5.7  | -4.4  | -4.9  | -5.2  | -5.1  | -4.9  | -4.8  | -5    | -5.5  | -5.2  | -4.1  | -6.1 | -6.1 | -5.3 | -5.6 | -5   | -5.8 | -5.6 | -5.8 | -5.5 | 0.55  |      |
| 1167 | -5.9  | -5.4  | -5.1  | -5.3  | -5.7  | -5.5  | -4.9  | -5.7  | -5.6  | -4.9  | -5.8  | -5    | -5.3  | -5.5  | -5.4  | -5.3  | -5.1  | -5.4  | -6.3  | -5.8  | -4    | -6.5 | -6   | -5.9 | -6.2 | -5.9 | -5.9 | -6.6 | -6.2 | -6.5 | 0.56  |      |
| 1168 | -5.9  | -5.1  | -5.2  | -5.2  | -5.6  | -5.9  | -5.1  | -5.3  | -5.9  | -5.2  | -5.7  | -4.6  | -4.9  | -5.1  | -5.8  | -4.6  | -4.7  | -5.7  | -5.5  | -5.5  | -5.3  | -6.2 | -6.1 | -5.8 | -6.5 | -5.8 | -6.1 | -5.7 | -6   | -6.3 | 0.50  |      |
| 1169 | -5.7  | -4.4  | -4.1  | -3.9  | -5.4  | -5    | -5    | -4.7  | -5.7  | -4.8  | -5.1  | -4.2  | -5    | -4.6  | -5.5  | -3.8  | -4.8  | -5.2  | -5.6  | -5.1  | -3.4  | -6.7 | -5.7 | -5.9 | -5.3 | -6   | -6.1 | -5.8 | -6.1 | -5.9 | 0.78  |      |
| 1170 | -4.9  | -3.6  | -3.9  | -4    | -4.4  | -4.6  | -3.9  | -4.8  | -5.1  | -3.2  | -4.2  | -3.1  | -4.4  | -4.9  | -4.3  | -4.7  | -4.4  | -4.4  | -5    | -4.3  | -1    | -5   | -5.7 | -5   | -5.4 | -5.1 | -5.2 | -5.1 | -5.4 | -5.2 | 0.91  |      |
| 1171 | -4.9  | -4.1  | -4.4  | -4.4  | -4.2  | -4.1  | -4.5  | -5.1  | -4.5  | -4.3  | -4.1  | -4.1  | -4.7  | -4.7  | -4.2  | -4.4  | -4.3  | -4.5  | -4.2  | -4    | -5.3  | -4.5 | -4.5 | -4.7 | -4.6 | -4.7 | -4.7 | -4.8 | -4.9 | 0.33 |       |      |
| 1172 | -4.5  | -3.5  | -4    | -3.8  | -4.5  | -4.4  | -4.6  | -3.7  | -5.4  | -3    | -4.5  | -4    | -4.4  | -4.7  | -4.4  | -3.7  | -4.5  | -4.4  | -5.2  | -4.2  | -3.1  | -4.5 | -5.3 | -4.8 | -4.8 | -5.1 | -5.1 | -5   | -5   | -5   | 0.62  |      |
| 1173 | -5.6  | -5.5  | -5    | -5.5  | -5.1  | -5.2  | -4.7  | -5.6  | -5.7  | -5.4  | -5.2  | -5.3  | -5.4  | -5.7  | -5.3  | -5.4  | -5    | -5.4  | -5.7  | -5.6  | 0.3   | -6.6 | -5.9 | -5.6 | -5.4 | -5.5 | -5.4 | -5.4 | -5.6 | -5.5 | 1.10  |      |
| 1174 | -5.7  | -4.4  | -5.3  | -4.6  | -5.5  | -5.3  | -4.1  | -5    | -5.3  | -4.1  | -5.1  | -4.1  | -4.9  | -5.4  | -5.2  | -4.5  | -4.5  | -5.5  | -5.9  | -5.6  | -4    | -5.8 | -6   | -6   | -6.1 | -5.8 | -6   | -5.9 | -5.8 | -5.8 | 0.67  |      |
| 1175 | -5.8  | -5.5  | -4.5  | -4.1  | -5.2  | -5    | -4.5  | -5.8  | -4.8  | -4.8  | -5.2  | -3.8  | -4.5  | -5.1  | -4.8  | -5.1  | -4.6  | -4.8  | -5.1  | -5.3  | -1.2  | -5.8 | -5.4 | -5.8 | -5.7 | -5.1 | -6   | -6   | -6   | -6   | 0.94  |      |
| 1176 | -5.5  | -3.7  | 0     | -1.6  | -6.3  | -6.1  | -5.3  | 2.2   | -7.3  | -0.4  | -6.5  | 4.2   | -4.1  | 4.4   | -4.6  | 7.5   | -5.2  | -6.2  | -6    | -5.7  | -2.9  | -5.4 | -6   | -4.7 | -5.9 | -6.4 | -6.2 | -6.4 | -6.6 | -6.5 | 3.86  |      |
| 1177 | -5    | -4.7  | -4.9  | -4.2  | -4.5  | -4.5  | -4    | -5.5  | -6    | -5    | -4.8  | -4.2  | -4.6  | -5    | -4.5  | -4.4  | -4.4  | -4.8  | -4.7  | -4.7  | -2.2  | -5.6 | -5.1 | -5   | -4.9 | -5.6 | -5.9 | -5.6 | -5.6 | -5.7 | 0.73  |      |
| 1178 | -5.8  | -4.9  | -5    | -5.1  | -4.5  | -5.3  | -5.2  | -5    | -5.7  | -5.2  | -5    | -4.7  | -5.8  | -5.2  | -5.9  | -4.7  | -4.9  | -4.7  | -5    | -5.2  | -5    | -5.2 | -6.2 | -5.4 | -5.2 | -5.2 | -5.7 | -5.4 | -5.3 | -5.5 | 0.39  |      |
| 1179 | -3.2  | -3.3  | -3.7  | -3.3  | -3.4  | -3.3  | -3.2  | -3.2  | -3.6  | -3.3  | -3.2  | -3.5  | -3.2  | -3.7  | -3.4  | -3.1  | -3.4  | -3.3  | -3.2  | -3.1  | -3.2  | -3.7 | -3.3 | -3.9 | -3.3 | -3.1 | -3.2 | -3.2 | -3.2 | -3.3 | 0.20  |      |
| 1180 | -4.8  | -4.5  | -4.4  | -4.1  | -5.1  | -4.5  | -4.5  | -4.9  | -5.1  | -4.6  | -4.9  | -4.4  | -4.3  | -5    | -4.9  | -4.4  | -4.7  | -5.1  | -4.9  | -5    | -4.4  | -5   | -5.1 | -5   | -5.1 | -5.4 | -5.7 | -5.4 | -5.7 | -6   | 0.45  |      |
| 1181 | -4.2  | -4.1  | -4.1  | -3.8  | -5.4  | -5    | -4.7  | -4.5  | -5.6  | -3.9  | -5.3  | -4    | -5.3  | -5    | -5.1  | -3.8  | -4.2  | -5.2  | -5.5  | -4.1  | -3.8  | -5   | -5.8 | -4.6 | -5.2 | -5   | -5   | -5.2 | -4.9 | 0.60 |       |      |
| 1182 | -4.8  | -4.1  | -4.1  | -4.1  | -5.1  | -4.6  | -4.9  | -4.3  | -5.4  | -4.2  | -5.2  | -4.2  | -4.5  | -4.7  | -5    | -4.2  | -4.2  | -4.8  | -5.2  | -4.4  | -4.3  | -4.7 | -5.4 | -4.6 | -4.7 | -4.8 | -4.9 | -4.9 | -4.8 | -4.9 | 0.39  |      |
| 1183 | -5.5  | -4.4  | -4.5  | -4.4  | -5.2  | -5.1  | -4.8  | -4.5  | -5.5  | -4.7  | -5.4  | -4.4  | -4.8  | -5.2  | -5    | -4.7  | -4.5  | -5.2  | -5.3  | -5.2  | -5.5  | -5.8 | -5.5 | -5.5 | -5.7 | -5.4 | -5.8 | -5.4 | -5.8 | -5.7 | 0.47  |      |
| 1184 | -4.8  | -4.2  | -4.9  | -4.7  | -4.7  | -4.6  | -4.5  | -4.5  | -4.4  | -4.8  | -4.5  | -4.9  | -4.7  | -5.1  | -4.8  | -4.2  | -4.5  | -4.3  | -4.6  | -4.3  | -5.5  | -4.7 | -5.3 | -5.1 | -5   | -4.6 | -4.8 | -4.6 | -4.7 | -4.8 | 0.30  |      |
| 1185 | 107.7 | 109.8 | 119.7 | 123.6 | 104.6 | 110.4 | 103.9 | 105.3 | 100.3 | 154.3 | 107.1 | 149.5 | 121.4 | 127.4 | 105.1 | 123.9 | 100.6 | 103.1 | 109.5 | 118.6 | 121.4 | 94.6 | 44.9 | 69.4 | 30.8 | 31.1 | 30.4 | 33.7 | 28.7 | 23.6 | 38.05 |      |
| 1186 | -4.3  | -5.4  | -4.7  | -4.1  | -4.3  | -3.9  | -3.8  | -4.2  | -4.9  | -4.2  | -4    | -3.7  | -3.7  | -4.7  | -4.6  | -4.3  | -4.7  | -4.9  | -5.3  | -4.6  | 1.8   | -4.8 | -4.7 | -5.3 | -4.6 | -5.5 | -4.9 | -4.9 | -5.6 | -4.8 | 1.28  |      |
| 1187 | -5    | -4.3  | -4.2  | -4.2  | -5    | -4.6  | -4.6  | -4    | -5.1  | -4.7  | -5.3  | -4.4  | -4.2  | -4.8  | -5.1  | -4.5  | -4    | -5.2  | -4.7  | -4.7  | -4.1  | -5   | -4.9 | -4.9 | -5   | -4.9 | -5.1 | -5   | -5   | -5.1 | 0.39  |      |
| 1188 | -4.4  | -4.4  | -5.2  | -4.5  | -4.2  | -4.2  | -3.9  | -3.9  | -5.2  | -4.8  | -4.6  | -4    | -4.2  | -3.9  | -4.7  | -4.5  | -5    | -4.5  | -4.6  | -4.5  | -4.2  | 3.8  | -5   | -4.9 | -5.6 | -4.9 | -5.1 | -4.7 | -4.7 | -4.7 | 1.59  |      |
| 1189 | -6    | -4.9  | -3.4  | -3.4  | -5.2  | -5.2  | -4.4  | -4.5  | -5.3  | -3.2  | -5.3  | -2.4  | -5.1  | -4.1  | -5.3  | -3.7  | -5.2  | -5.6  | -4.8  | -2.7  | -5.5  | -6.1 | -5.3 | -6.4 | -5.9 | -6   | -6.2 | -6.1 | -6.1 | 1.09 |       |      |
| 1190 | -5.3  | -4.5  | -4.1  | -4.2  | -5.2  | -5.2  | -4.2  | -4.5  | -5.5  | -4.5  | -5.3  | -4.7  | -4.3  | -5    | -4.4  | -4.1  | -4.4  | -5.4  | -5.6  | -5.3  | -3.7  | -5.1 | -5.2 | -4.6 | -4.6 | -4.6 | -5.1 | -5.2 | -5.1 | -5.4 | 0.51  |      |
| 1191 | -4.8  | -3.6  | -3.8  | -3.4  | -5.1  | -4.9  | -5    | -4.1  | -5.5  | -3.8  | -5    | -4.1  | -5.1  | -4.3  | -4.6  | -3.5  | -4.3  | -5    | -5.3  | -4.2  | -4    | -4.8 | -4.8 | -4.6 | -5.1 | -5   | -4.8 | -4.9 | -5   | -5.2 | 0.58  |      |
| 1192 | -5.5  | -5.4  | -5    | -5.3  | -5.2  | -5.7  | -4.9  | -5.3  | -6.9  | -4.8  | -5.7  | -4.9  | -5.5  | -5.9  | -5.6  | -4.4  | -4.9  | -5.5  | -6    | -5.6  | -3    | -5.9 | -6.3 | -5.7 | -6.3 | -6.2 | -6.5 | -6.3 | -6.3 | -6.4 | 0.76  |      |
| 1193 | -5.8  | -4.7  | -4.8  | -4.2  | -5.8  | -4.6  | -5.4  | -4    | -5.5  | -5.1  | -5.4  | -0.8  | -5.5  | -5.1  | -5.2  | -3.2  | -4.7  | -5.3  | -6.4  | -6    | 5.2   | -5.7 | -6.2 | -5.6 | -5.7 | -6.2 | -6.2 | -6.2 | -6.3 | -6.5 | -5.8  | 2.21 |
| 1194 | -3.9  | -3.9  | -4.4  | -4    | -4.1  | -3.9  | -3.7  | -4.2  | -3.8  | -3.8  | -4    | -4    | -3.9  | -4.2  | -3.9  | -4    | -3.9  | -4    | -3.7  | -4.8  | -5.2  | -4.2 | -4.5 | -4   | -3.9 | -4   | -3.9 | -3.9 | -4   | 0.31 |       |      |
| 1195 | -4.2  | -3.8  | -3.6  | -2.2  | -4.4  | -4.3  | -1.8  | -3.9  | -3.9  | -2.8  | -4.4  | 0.7   | -3.3  | -2.9  | -4.1  | -2.7  | -1.2  | -3.5  | -4.5  | -4.8  | 2.4   | -4.4 | -6.5 | -4.2 | -5.2 | -5   | -5.5 | -5.6 | -6   | -5.4 | 1.88  |      |
| 1196 | -6.3  | -5.1  | -4.6  | -3.4  | -6.5  | -6    | -4.1  | -5.1  | -6.5  | -3.7  | -5    | -4.6  | -4.1  | -5.8  | -5.3  | -4.5  | -5    | -4.7  | -5.4  | -4.9  | -1.8  | -5.5 | -6.1 | -5.4 | -5.8 | -5.6 | -5.5 | -5.9 | -5.7 | -5.7 | 1.00  |      |
| 1197 | -5    | -4.5  | -4.2  | -3.9  | -5.1  | -5.3  | -4.2  | -4.5  | -5.6  | -3.7  | -6.5  | -1.9  | -4.7  | -5.1  | -4.1  | -4.7  | -3.2  | -4.3  | -5.4  | -4.7  | 1.4   | -5.8 | -6.4 | -6.2 | -6.5 | -6.8 | -6.4 | -6.6 | -6.4 | -6.4 | 1.67  |      |
| 1198 | -6.1  | -5.1  | -4.8  | -4.6  | -6.5  | -5.6  | -4.5  | -4.5  | -6.5  | -3.9  | -6.3  | -3.7  | -4.7  | -4.9  | -5.8  | -3.6  | -4.4  | -5.9  | -6.5  | -5.8  | -3.1  | -5.9 | -7   | -5.1 | -6.7 | -6.4 | -6.1 | -6.6 | -6.7 | -6.9 | 1.10  |      |
| 1199 | -6    | -4.4  | -4.9  | -3.8  | -5.6  | -6.1  | -4.8  | -3.7  | -5.2  | -4.2  | -4.9  | -2.4  | -4.4  | -6    | -4.5  | -3.4  | -4.1  | -6    | -4.9  | -4.8  | -3.2  | -4.9 | -6   | -5.4 | -5.6 | -5.9 | -5.7 | -5.9 | -6   | -5.9 | 0.99  |      |
| 1200 | -5.7  | -4.7  | -5    | -5.4  | -5.4  | -5.1  | -5.1  | -5.2  | -6.6  | -5.7  | -5.2  | -5.1  | -5    | -5.3  | -5.3  | -4.6  | -4.8  | -5.5  | -5.6  | -5.8  | -3.8  | -6.4 | -6   | -5.7 | -5.5 | -5.5 | -5.6 | -5.7 | -5.8 | 0.54 |       |      |
| 1201 | -6.2  | -6.1  | -6    | -5.8  | -6.3  | -5.5  | -5.2  | -6.4  | -5.8  | -6    | -5.4  | -5.7  | -5.5  | -6.6  | -6.1  | -6.4  | -5.7  | -5.8  | -5.9  | -6    | -1.9  | -7.2 | -6.4 | -6.9 | -6   | -6   | -6.2 | -6.1 | -6.2 | -6.2 | 0.87  |      |
| 1202 | -3    | -2.7  | -3    | -3.2  | -3.1  | -3    | -3    | -3.3  | -3.2  | -3.1  | -3.3  | -3    | -3.3  | -3.5  | -2.6  | -2.9  | -3.1  | -2.7  | -2.9  | -2.9  | -3.6  | -3.3 | -3.2 | -3.4 | -2.8 | -2.7 | -2.9 | -2.8 | -2.9 | -2.8 | 0.25  |      |
| 1203 | -4.7  | -3.2  | -3.1  | -3.6  | -5.6  | -5.3  | -4.8  | -3.5  | -5.4  | -2    | -5.4  | -0.4  | -4.4  | -4.3  | -5    | -2.9  | -4.7  | -5.4  | -5.5  | -4.9  | -1.3  | -4.9 | -6.4 | -4.5 | -5.8 | -5.5 | -6.1 | -5.7 | -5.8 | -5.7 | 1.45  |      |
| 1204 | -5.8  | -4.9  | -5.1  | -5.6  | -5.8  | -5.6  | -4.6  | -5.4  | -6.1  | -5.6  | -5.2  | -5.1  | -4.9  | -5.2  | -5.3  | -5    | -5.3  | -5.1  | -6    | -5.7  | -4.2  | -7.2 | -6   | -7.5 | -6   | -5.9 | -5.5 | -5.5 | -5.5 | -5.8 | 0.66  |      |
| 1205 | -6.5  | -4.2  | -1.4  | -1.3  | -6.7  | -6.6  | -5.8  | -4.6  | -8    | -5.3  | -7.1  | -3.2  | -6    | -4.9  | -6.1  | -3    | -5.6  | -6.2  | -6.8  | -6.4  | -0.6  | -6.3 | -7.3 | -6.8 | -7.3 | -7.1 | -7.6 | -7.5 | -7.3 | 0.01 |       |      |
| 1206 | -5.7  | -5.2  | -5.1  | -4.4  | -5.6  | -5.3  | -4.9  | -5.4  | -5.7  | -5    | -5.2  | -4.8  | -4.7  | -5.4  | -5.3  | -4.8  | -4.9  | -6    | -5.2  | -2.6  | -6.2  | -6   | -5.7 | -5.9 | -5.8 | -5.7 | -5.8 | -6   | -5.8 | 0.68 |       |      |
| 1207 | -4.6  | -4    | -4.3  | -4.7  | -4.1  | -4.3  | -4.1  | -4    | -4.4  | -4.3  | -4.1  | -4.2  | -4.3  | -4.3  | -4.2  | -3.9  | -3.8  | -4.2  | -4.4  | -3.8  | -4.2  | -4.8 | -4.3 | -4.7 | -4.7 | -4.3 | -4.7 | -4.5 | -4.6 | -4.7 | 0.28  |      |
| 1208 | -5.5  | -5.3  | -4.7  | -4.7  | -5.3  | -5    | -4.5  | -5.3  | -5.4  | -5    | -5.1  | -4.8  | -4.2  | -5.2  | -5.2  | -5.2  | -4.6  | -5.2  | -5.5  | -5.1  | -3.9  | -6.3 | -5.9 | -6.2 | -5.3 | -5.6 | -5.6 | -5.5 | -5.7 | -5.6 | 0.53  |      |
| 1209 | -5.1  | -4.5  | -4.9  | -4.5  | -5.1  | -4.6  | -4.5  | -4.6  | -5.1  | -4.6  |       |       |       |       |       |       |       |       |       |       |       |      |      |      |      |      |      |      |      |      |       |      |

|      |      |      |      |      |      |      |      |      |      |      |      |      |      |      |      |      |      |      |      |      |      |      |      |      |      |      |      |      |      |      |       |       |
|------|------|------|------|------|------|------|------|------|------|------|------|------|------|------|------|------|------|------|------|------|------|------|------|------|------|------|------|------|------|------|-------|-------|
| 1250 | -6.6 | -4.6 | -0.1 | 2    | -5.1 | -3.9 | -4.6 | -0.1 | -7.6 | 8.4  | -5.5 | 2.6  | -2.3 | 7.1  | -2.2 | 2.1  | -5   | -4.8 | -4.1 | -4.7 | 7    | -1   | -6   | -5.1 | -7.1 | -7   | -6.6 | -7.6 | -7.3 | -7.6 | 4.62  |       |
| 1251 | -6.1 | -4.7 | -1.6 | -0.3 | -6   | -6   | -4.6 | 10.1 | -7   | 0.4  | -5.8 | 4.2  | -2   | 1.9  | -4.8 | 1.7  | -5.6 | -5.2 | -5.7 | -5.3 | 2.7  | -0.3 | -6.3 | -3.7 | -7.2 | -6.5 | -6.7 | -7.2 | -6.5 | -7.2 | 4.45  |       |
| 1252 | 43.9 | 46.2 | 56.7 | 78.7 | 66.6 | 59.6 | 55.5 | 43.8 | 48.9 | 62   | 33.4 | 79.3 | 76.1 | 54.9 | 48.7 | 54.3 | 56.3 | 43.4 | 55.6 | 72.8 | 65.1 | 33.7 | -6.3 | 2.3  | 17.2 | 2.2  | 1.4  | 0.3  | 2.9  | -3.2 | -2.4  | 27.01 |
| 1253 | 47.7 | 48.4 | 69.6 | 88.6 | 78.6 | 65.3 | 61   | 60.2 | 65.1 | 71.9 | 55   | 77.9 | 75.8 | 77.9 | 51.2 | 53.2 | 74.6 | 52.7 | 70.2 | 66   | 74.6 | 33   | 3.6  | 27.7 | 2.5  | 5.2  | 7.1  | -2.1 | 1.8  | 2.2  | 28.97 |       |
| 1254 | -6.3 | -4.7 | -5   | -4.4 | -5.2 | -5.1 | -4.6 | -5   | -5.6 | -5.3 | -4.9 | -5.3 | -4.8 | -5.3 | -5   | -4.7 | -4.5 | -5.9 | -5.5 | -3.1 | -6.4 | -5.9 | -5.8 | -5.9 | -6.2 | -6.1 | -6   | -6.2 | -6.4 | 0.74 |       |       |
| 1255 | -5.4 | -4.9 | -4.7 | -4.6 | -5.3 | -5.7 | -4.9 | -5.2 | -5.4 | -4.8 | -5.3 | -5.2 | -4.9 | -5.3 | -5.4 | -4.4 | -4.9 | -5.6 | -5.9 | -5.4 | -0.5 | -5.7 | -5.8 | -5.6 | -5.5 | -5.7 | -5.3 | -5.8 | -5.8 | -5.7 | 0.96  |       |
| 1257 | -5.1 | -4.4 | -4.3 | -3.9 | -4.7 | -4.7 | -4   | -4.3 | -5.1 | -4.4 | -4.8 | -4.5 | -4.3 | -4.7 | -4.6 | -4   | -4.1 | -4.9 | -5   | -4.8 | -3.3 | -5   | -5   | -5   | -5.7 | -5.3 | -5.3 | -5.4 | -5.3 | -5.6 | 0.55  |       |
| 1258 | -3.7 | -3   | -3.5 | -1.5 | -2.8 | -2.6 | -3.3 | -3.5 | -5.1 | -3.8 | -4   | -2.1 | -3.4 | -3.3 | -3.7 | -2.6 | -3.3 | -3.6 | -4.5 | -3.5 | 4.5  | -3.5 | -4.6 | -4.8 | -4.6 | -4.4 | -4.7 | -4.8 | -4.3 | -4.8 | 1.73  |       |
| 1259 | -1.1 | -1.9 | 4.2  | 2    | -0.7 | -2.2 | 2.1  | 0.7  | -1.4 | 12.3 | 2.3  | 26.2 | -0.4 | 5.7  | -1.3 | 24.2 | 2.5  | 0    | -2.1 | -0.7 | 25.3 | 2.8  | -5.6 | -4.3 | -5.6 | -5.2 | -5.8 | -6.1 | -5.1 | -5.6 | 8.90  |       |
| 1260 | -5.8 | -5.2 | -4.5 | -4.6 | -5.2 | -5.1 | -4.5 | -5.6 | -4.9 | -5.6 | -4.4 | -4.9 | -5.1 | -5.8 | -5   | -5.4 | -4.8 | -4.8 | -5.2 | -4.8 | 5    | -5.6 | -5.1 | -5.5 | -5.9 | -5.2 | -5.2 | -5.4 | -5.2 | -5.9 | 1.90  |       |
| 1261 | -2   | -1.9 | -1.9 | -2.1 | -2.1 | -2.1 | -2   | -2   | -2.1 | -2.1 | -2.1 | -2   | -2   | -2   | -2   | -2.1 | -2   | -1.9 | -1.9 | -2.4 | -2.4 | -1.8 | -2.4 | -2   | -1.9 | -1.9 | -2   | -1.9 | -2   | -1.9 | 0.15  |       |
| 1262 | -4.6 | -3.8 | -3.6 | -3.2 | -4.5 | -3.9 | -4.6 | -4.3 | -5.1 | -3.5 | -4.3 | -3.3 | -4.1 | -4.3 | -4.2 | -3.5 | -4.4 | -4.1 | -5   | -4.2 | -0.8 | -4.8 | -5.7 | -5.1 | -5.2 | -5   | -4.8 | -5.1 | -5.1 | -4.9 | 0.91  |       |
| 1263 | -4.7 | -3.8 | -3.9 | -3.1 | -4.5 | -4.4 | -4.7 | -4.1 | -4.6 | -3.6 | -4.1 | -3.4 | -4.2 | -4.2 | -4.3 | -3.9 | -4.5 | -4.4 | -4.1 | -4.1 | -2.6 | -4.7 | -5.6 | -5   | -5.2 | -4.9 | -5   | -5.1 | -4.9 | -5.2 | 0.66  |       |
| 1264 | -4.4 | -4.1 | -3.9 | -2.6 | -4.5 | -4   | -3.4 | -4.3 | -4.6 | -4.9 | -4.3 | -2.5 | -3.6 | -4.4 | -4.1 | -3.1 | -3.7 | -4.4 | -4.8 | -4.5 | 0.8  | -5.6 | -6.1 | -5.3 | -5.4 | -5.2 | -5.2 | -5.5 | -5.4 | -5.4 | 1.30  |       |
| 1265 | -5.2 | -5.2 | -5   | -4.6 | -5   | -4.6 | -4.6 | -4.8 | -5.4 | -4.6 | -5   | -4.2 | -4.3 | -4.9 | -4.6 | -4.6 | -5.2 | -4.8 | -5.7 | -5.1 | -3.2 | -6.5 | -5.5 | -5.2 | -5.2 | -5.4 | -5.2 | -5.3 | -5.2 | -5.2 | 0.56  |       |
| 1266 | -5.9 | -4.4 | -4.2 | -4.4 | -6.1 | -5.8 | -5.3 | -4.1 | -6.4 | -4.3 | -6.1 | -3.7 | -5.4 | -5.1 | -5.5 | -3.9 | -4.9 | -6.1 | -6.2 | -5.4 | -4   | -5.8 | -6.1 | -5.3 | -6.3 | -6   | -6.1 | -6.3 | -6.2 | -6.2 | 0.87  |       |
| 1267 | -6.7 | -5.4 | -5.8 | -5.9 | -6.3 | -5.9 | -5.3 | -5.6 | -7.1 | -5.3 | -6.3 | -5.2 | -5.3 | -6.2 | -5.6 | -5.2 | -5.5 | -6.3 | -6.5 | -6.4 | -4.8 | -6.9 | -6.6 | -6.4 | -6.7 | -6.4 | -6.7 | -6.6 | -6.7 | -6.8 | 0.63  |       |
| 1268 | -4.7 | -2.1 | 4.3  | 2.9  | 1.6  | -0.7 | -2.9 | -3.2 | -3.7 | 3.5  | -4.6 | 6.3  | -5.2 | 1    | -5.3 | 10.4 | -4.3 | -3.1 | -6.1 | -2.7 | 7.7  | -4.5 | -6   | -4.3 | -6.8 | -5.7 | -6.6 | -8.2 | -6.1 | -7.9 | 4.81  |       |
| 1269 | -5.9 | -5.2 | -3.7 | -3.1 | -6   | -5.5 | -4.8 | -4.6 | -6.1 | -3.9 | -6   | -3.6 | -5.2 | -5.1 | -6   | -4.4 | -5   | -5.5 | -6.1 | -5.6 | 0.6  | -4.9 | -6.3 | -5.8 | -6.2 | -5.9 | -6.1 | -5.8 | -6.1 | -6.2 | 1.39  |       |
| 1270 | -4.5 | -4.3 | -4.2 | -4.3 | -4.2 | -4.1 | -4   | -4   | -4.6 | -4.6 | -4.4 | -3.8 | -4.2 | -4.4 | -4.2 | -3.9 | -4.2 | -4.3 | -4.5 | -4.3 | -3.8 | -4.9 | -4.9 | -4.6 | -4.3 | -4.5 | -4.4 | -4.6 | -4.4 | -4.5 | 0.27  |       |
| 1271 | -3.9 | -3   | -1.4 | 3    | -3.3 | -3.8 | 2.6  | 0.9  | -4.7 | 1.6  | -3.3 | 3.5  | -2.3 | -3.4 | -3   | -2.3 | -4   | -3.1 | -5.3 | -3.8 | -0.3 | -2.6 | -6.3 | -4.5 | -6   | -5.9 | -6.5 | -5.7 | -6.9 | -6.1 | 2.90  |       |
| 1272 | -4.7 | -3   | -0.6 | 2.6  | -5.2 | -4.3 | -3.1 | 1.9  | -5.3 | 0.6  | -5   | 13   | -4.8 | 3.4  | -4.2 | 6    | -4.3 | -4.4 | -4.8 | -3.7 | -4.3 | -2.6 | -5.6 | -4.3 | -6.2 | -6.1 | -6.2 | -6.2 | -5.9 | -5.9 | 4.35  |       |
| 1273 | -5.2 | -4.5 | -4.8 | -4.4 | -4.8 | -4.8 | -4.3 | -5   | -4.9 | -4.6 | -4.9 | -3.6 | -4.8 | -5.5 | -4.7 | -4.1 | -4.4 | -4.6 | -5.3 | -4.8 | -2.5 | -6.2 | -5.4 | -5.3 | -5.3 | -5.1 | -5.3 | -5   | -5.2 | -5.3 | 0.66  |       |
| 1275 | -5.3 | -4.8 | -4.8 | -4.6 | -4.3 | -4.7 | -4.4 | -4.6 | -5.4 | -4.4 | -5.1 | -4.2 | -4.3 | -5.4 | -4.5 | -4.3 | -4.1 | -5.2 | -4.9 | -4.7 | -2.6 | -4.9 | -6.2 | -4.8 | -5.4 | -5.3 | -5.5 | -5.7 | -5.5 | -5.3 | 0.66  |       |
| 1276 | -5   | -5.6 | -4.8 | -2.5 | -5.5 | -5.3 | -4.4 | -4.5 | -5.3 | -2.1 | -4.9 | -3.3 | -4.5 | -6.3 | -3.8 | -4   | -2.5 | -5.5 | -5.5 | -4.9 | -2.8 | -4.6 | -6.3 | -5.7 | -6.4 | -6.6 | -6.1 | -6.5 | -6.4 | -6   | 1.29  |       |
| 1277 | -4.5 | -2.3 | 0.4  | 4.7  | -1.8 | -2   | -2   | -2.6 | -3.7 | 7.3  | -3.2 | -2.3 | -0.4 | -1.9 | -1.2 | -0.8 | 0    | -3.9 | -3.4 | -3.4 | 5.2  | -4.9 | -6.5 | -5.1 | -6   | -5.8 | -6   | -6.3 | -6.1 | -6.3 | 3.46  |       |
| 1278 | -6   | -5   | -3.8 | -4.1 | -5.7 | -5.4 | -4.8 | -5   | -5.3 | -5.1 | -5.3 | -4.6 | -4.2 | -5   | -5.1 | -5.2 | -4.3 | -5.8 | -5.6 | -5.1 | -1.7 | -6.3 | -6.1 | -5.9 | -5.6 | -5.4 | -6   | -5.7 | -5.9 | -5.7 | 0.90  |       |
| 1279 | -5.9 | -5   | -4.1 | -3.8 | -5.7 | -5.6 | -4.9 | -4.5 | -5.7 | -4.3 | -5.3 | -4.1 | -4.2 | -5   | -4.9 | -4.7 | -4.5 | -5.5 | -5.9 | -5.1 | -0.9 | -6.1 | -6.1 | -5.5 | -5.7 | -5.4 | -5.7 | -5.5 | -5.7 | 1.02 |       |       |
| 1280 | -5.2 | -5.1 | -4.7 | -5   | -5.2 | -4.8 | -4.4 | -5.1 | -5.1 | -5.2 | -5   | -4.3 | -4.5 | -5.2 | -5.5 | -5.3 | -4.8 | -5   | -5.6 | -4.9 | -1.2 | -6.2 | -5.8 | -6.1 | -5.3 | -5.3 | -5.1 | -5.4 | -5.3 | -5.4 | 0.84  |       |
| 1281 | -5.2 | -4.7 | -4.5 | -4.7 | -4.9 | -4.9 | -5.1 | -4.7 | -5.4 | -4.4 | -4.9 | -4.6 | -4.4 | -4.7 | -4.6 | -4.1 | -4.5 | -5   | -5.3 | -5.2 | -4.3 | -5.2 | -5.5 | -5   | -5.5 | -5.5 | -5.4 | -5.6 | -5.3 | -5.5 | 0.42  |       |
| 1282 | -4.8 | -3.7 | 0    | -1.5 | -4.7 | -4.1 | -2.7 | -3.7 | -6.1 | 0.3  | -4.6 | 0.2  | -2.6 | -4.5 | -4.2 | -2.5 | -3.2 | -4.8 | -5.3 | -4.7 | 1.6  | -5.4 | -6.5 | -5.1 | -6.3 | -6.4 | -5.7 | -6.5 | -6.2 | -6.1 | 2.23  |       |
| 1283 | -5.4 | -4.1 | -5.7 | -5.1 | -5   | -4.7 | -4.9 | -4.5 | -5.6 | -5.2 | -5.3 | -4.1 | -4.8 | -4.9 | -4.6 | -3.9 | -4.3 | -5.2 | -5.3 | -5   | -4.6 | -5.2 | -6.2 | -5.2 | -5.6 | -5.5 | -5.5 | -5.3 | -5.5 | -5.5 | 0.53  |       |
| 1284 | 0    | 10.4 | 18   | 25.6 | -0.6 | 4.1  | 2.8  | 27   | 4.1  | 28.3 | 4.9  | 4.1  | 16.2 | 16.2 | 5.7  | 22.8 | 1.2  | 4.6  | 0.5  | -2   | 13.4 | 11.1 | -4.8 | 0.4  | -4.7 | -4.9 | -5   | -5.5 | -5.9 | -6.1 | 12.47 |       |
| 1285 | -5.3 | -4.4 | -4.6 | -4.3 | -5.3 | -5.4 | -4.3 | -5.1 | -5.6 | -4.9 | -5.3 | -4.5 | -4.8 | -5   | -4.7 | -4   | -4.3 | -5.3 | -6.1 | -5.2 | -3.5 | -5.5 | -5.6 | -4.9 | -6.1 | -5.5 | -5.8 | -5.9 | -5.6 | -6   | 0.65  |       |
| 1286 | -5.9 | -5.2 | -5.3 | -4.9 | -5.1 | -5.6 | -5.2 | -5.2 | -6.1 | -4.9 | -5.3 | -4.6 | -5.1 | -5.2 | -5.7 | -4.8 | -4.5 | -5.4 | -5.7 | -5.8 | -4.2 | -6   | -5.8 | -5.4 | -5.9 | -5.9 | -5.8 | -5.8 | -5.8 | -5.9 | 0.49  |       |
| 1287 | -5.1 | -4.5 | -5.3 | -4.2 | -5.2 | -5.2 | -4.7 | -4.2 | -6.5 | -5   | -6   | -5.2 | -5.7 | -5.3 | -6   | -4.8 | -5.2 | -5   | -5.5 | -5   | -3.5 | -4.8 | -5.8 | -5.2 | -5.4 | -6   | -5.9 | -6.3 | -6   | -6.3 | 0.69  |       |
| 1288 | -6.3 | -4.3 | -5.2 | -4.5 | -5   | -5   | -4.3 | -4.4 | -6.3 | -4.5 | -5.8 | -4.9 | -4.1 | -5   | -5.3 | -5   | -4.6 | -5.1 | -6.4 | -4.8 | -3.6 | -4.6 | -5.8 | -5.6 | -6.1 | -6   | -6   | -6.3 | -6.3 | -6.4 | 0.80  |       |
| 1289 | -5.2 | -4.2 | -4.7 | -4.5 | -4.8 | -4.7 | -4.6 | -4.6 | -5   | -4.8 | -4.6 | -4.2 | -4.7 | -5.5 | -4.6 | -4.5 | -4.8 | -4.8 | -5   | -4.7 | -2.5 | -5.2 | -5.3 | -5.1 | -5.1 | -5.2 | -5.1 | -5.1 | -5.2 | -5.3 | 0.54  |       |
| 1290 | -5.7 | -5.5 | -5.1 | -5.2 | -5.3 | -5.2 | -5.2 | -5.8 | -5.8 | -5.2 | -5.5 | -5.4 | -5.4 | -5.5 | -5.3 | -5.2 | -5.2 | -5.7 | -5.2 | -2.5 | -5.5 | -6   | -6.4 | -5.9 | -5.6 | -5.6 | -5.5 | -5.7 | -5.7 | -5.5 | 0.62  |       |
| 1291 | 36.3 | 29.1 | 54.8 | 65   | 47.9 | 39.1 | 38.1 | 39.9 | 33.6 | 63.9 | 47.1 | 77.3 | 59   | 44.7 | 52.8 | 60.5 | 43.3 | 29.5 | 27.2 | 43   | 75   | 24.3 | 5.4  | 9.2  | 5.8  | 8.3  | 3.2  | 1.9  | 3.9  | 2.8  | 22.82 |       |
| 1292 | -3.8 | -3.1 | -1   | 11.9 | -5.5 | -4   | -2.1 | 1.8  | -6.5 | 7.2  | -5   | 20.8 | -3.9 | 9.4  | -5   | 2.4  | -4.5 | -5.4 | -5.7 | -4.1 | -2.3 | -0.2 | -6.8 | -7   | -6.3 | -6.4 | -6.3 | -7.1 | -6.9 | -6.6 | 6.54  |       |
| 1293 | -6   | -4.5 | -4.2 | -4.2 | -5.2 | -5.1 | -5.6 | -4.6 | -6.6 | -4.3 | -5.8 | -3.2 | -5   | -5.1 | -5.3 | -4.2 | -4.1 | -5.8 | -5.8 | -5.3 | 0.5  | -6.4 | -6.2 | -5.8 | -6   | -5.7 | -6.2 | -5.8 | -6.1 | -6.3 | 1.35  |       |
| 1294 | -5.8 | -4.5 | -4.3 | -3.7 | -5.5 | -5.4 | -5.4 | -4.8 | -6.5 | -5.2 | -5.8 | -2.6 | -5.2 | -5.7 | -5.5 | -4.7 | -4.3 | -6   | -5.7 | -5.4 | 0.9  | -5.7 | -5.8 | -6.1 | -6   | -5.8 | -6.1 | -5.6 | -5.9 | -5.9 | 1.15  |       |
| 1295 | -5.4 | -4.7 | -4.3 | -4.3 | -5   | -4.5 | -4.5 | -4.7 | -5.6 | -4.8 | -4.8 | -4.1 | -4.4 | -5.1 | -4.7 | -4.5 | -4.6 | -5.2 | -5.1 | -5   | 2.8  | -5.3 | -5.4 | -5.4 | -5.4 | -4.9 | -5.2 | -5.5 | -5.2 | -5.6 | 1.47  |       |
| 1296 | -3.5 | -3.4 | -3.4 | -4   | -3.9 | -3.5 | -3.6 | -3.1 | -3.6 | -3.7 | -3.5 | -3.7 | -3.2 | -3.5 | -3.4 | -3.5 | -3.6 | -3.1 | -3.1 | -4.2 | -4   | -3.7 | -3.8 | -3.4 | -3.4 | -3.5 | -3.5 | -3.5 | -3.4 | -3.4 | 0.26  |       |
| 1297 | -5.7 | -4.4 | -5   | -2.9 | -5.9 | -5.6 | -5.9 | -4   | -6.4 | -4.3 | -6   | -2.9 | -4.3 | -5.1 | -5.8 | -3   | -5.4 | -6.3 | -6.2 | -4.7 | 2.1  | -4.3 | -7   | -5.4 | -6.8 | -6.4 | -6.3 | -6.7 | -6.6 | -6.6 | 1.80  |       |
| 1298 | -6.9 | -6.3 | -4.3 | -5.5 | -6.5 | -6.4 | -4.8 | -5.8 | -7.1 | -5.3 | -5.9 | -5.1 | -6.1 | -6.2 | -5.7 | -6.1 | -6.3 | -6.6 | -6.8 | -6.7 | 0.6  | -6.9 | -7.5 | -7   | -6.5 | -7.1 | -6.4 | -7.4 | -6.9 | -6.9 | 1.47  |       |
| 1299 | -6.7 | -5.7 | -5.3 | -4.4 | -5.9 | -6.2 | -5.3 | -6.1 | -6.4 | -5.9 | -5.4 | -4.2 | -5.1 | -6.4 | -6.2 | -4.4 | -5   | -5.7 | -6.8 | -5.8 | 1.2  | -7.3 | -6.9 | -6.5 | -7   | -6.2 | -6.6 | -6.6 | -6.7 | -6.8 |       |       |

|      |      |      |      |      |      |      |      |      |      |      |      |      |      |      |      |      |      |      |      |      |      |       |      |      |      |      |      |      |      |      |       |      |
|------|------|------|------|------|------|------|------|------|------|------|------|------|------|------|------|------|------|------|------|------|------|-------|------|------|------|------|------|------|------|------|-------|------|
| 1341 | -4.4 | -1.7 | 3.3  | 1.6  | -4.4 | -5.1 | -0.9 | 2.2  | -4.8 | 3.1  | -5.4 | 10.5 | -5   | 1    | -3.8 | 4.9  | -4.2 | -4.5 | -6.3 | -2.7 | 14.1 | -1.2  | -6.3 | -5.5 | -6.6 | -6.5 | -6.7 | -6.1 | -6.2 | -6.6 | 5.22  |      |
| 1342 | -3.4 | -3.1 | -2.7 | -3.6 | -3   | -3.5 | -3   | -2.9 | -3.3 | -2.5 | -2.5 | -2.7 | -3.1 | -3.3 | -3   | -2.4 | -2.5 | -3   | -2.8 | -2.8 | -2.8 | -3.1  | -2.4 | -3.1 | -2.8 | -2.6 | -2.8 | -2.7 | -2.6 | -2.7 | 0.32  |      |
| 1343 | -4.4 | -4.4 | -1.3 | -1.8 | -4.3 | -3.9 | -2.8 | -3.6 | 4    | -2.5 | -4.6 | -0.8 | -4.7 | -2.9 | -4.1 | -3   | -4.9 | -3.8 | -4.7 | -4.7 | -4.4 | -3.8  | -6.7 | -5.8 | -5.5 | -5.4 | -5.1 | -4.9 | -5.2 | -5.6 | 1.57  |      |
| 1344 | -2   | -2.8 | 1.1  | -0.3 | -3.1 | -2.1 | -2.1 | -3.4 | -2.2 | -5.5 | 0.8  | -4.6 | 0.5  | -2.3 | -4.4 | -3   | -2.1 | -2   | -3.8 | -5.1 | -3.4 | -2.8  | -5   | -6.6 | -5.2 | -4.7 | -4.9 | -4.8 | -4.4 | -4.7 | -5    | 1.95 |
| 1345 | -6.8 | -4.7 | -3.2 | -2.8 | -5.7 | -5.5 | -6.3 | -3.8 | -7.9 | -2.7 | -6.9 | -0.5 | -6.7 | -5   | -6.4 | -2.2 | -5.6 | -5.5 | -6.2 | -5.8 | -0.3 | -6.5  | -7.2 | -5.8 | -7   | -6.6 | -6.4 | -7   | -6.3 | -6.2 | 2.01  |      |
| 1346 | -5.3 | -3.7 | -2.5 | -0.5 | -5   | -4.7 | -3.7 | -3.1 | -5.7 | -2.2 | -4.5 | 1.6  | -4.3 | -4.2 | -5.3 | -2.2 | -5.3 | -4.7 | -5.8 | -4.8 | -0.6 | -5.5  | -7.2 | -5.7 | -5.2 | -5.3 | -5.1 | -5.8 | -5.3 | -5.7 | 1.90  |      |
| 1347 | -5.7 | -5.1 | -4.9 | -5.1 | -5.6 | -5.2 | -5.6 | -5.6 | -6.3 | -4.4 | -5.2 | -1.6 | -5.7 | -5.7 | -5.4 | -4.7 | -5.1 | -6.3 | -6   | -5.7 | 2.3  | -5.1  | -6.4 | -5.6 | -6   | -5.8 | -5.9 | -5.8 | -5.9 | -6   | 1.65  |      |
| 1348 | -5   | -4.6 | -4.6 | -2   | -6   | -5.9 | -3.8 | -1.4 | -5.5 | -2.1 | -3.3 | 0.5  | -3.6 | -5   | -4.3 | -3.5 | -4.5 | -4.9 | -7   | -6.1 | 11.7 | -5.1  | -5.8 | -6.5 | -6.1 | -6.4 | -5.9 | -7.4 | -6.9 | -6.6 | 3.52  |      |
| 1349 | -4.9 | -3.4 | -3.5 | -3.4 | -5.4 | -3.7 | -3.8 | -3.7 | -6.1 | 2.2  | -4.6 | -0.4 | -5.6 | -1.7 | -4.2 | -0.9 | -5.2 | -5.1 | -6.2 | -5.7 | 11.5 | -4.3  | -6.2 | -6.4 | -6.4 | -5.9 | -6.3 | -5.6 | -6.4 | -6.9 | 3.57  |      |
| 1350 | -6   | -4.6 | -3.7 | -3.6 | -6   | -5.5 | -5   | -3.7 | -5.9 | -3.3 | -5.2 | 3.1  | -4.7 | -3.8 | -5.4 | -1.8 | -4.9 | -5.4 | -6.1 | -6   | 8.9  | -5.3  | -6.4 | -6.3 | -6.8 | -6.4 | -6.6 | -6.4 | -6.6 | -6.7 | 3.20  |      |
| 1351 | -6   | -4.8 | -4.1 | -4.1 | -6.2 | -6.2 | -6.1 | -4.8 | -6.3 | -3.8 | -6.2 | -2.5 | -5.6 | -5.3 | -5.5 | -2.4 | -5.2 | -6.3 | -4.7 | -6.3 | -1.3 | -4.9  | -6.8 | -5.5 | -6.3 | -6.9 | -4.6 | -7   | -6.8 | -6.3 | 1.42  |      |
| 1352 | -5.7 | -4.8 | -4.6 | -4.9 | -5   | -4.9 | -4.5 | -5.3 | -4.5 | -4.8 | -5.2 | -4.3 | -4.6 | -5.5 | -5.1 | -5.2 | -4.7 | -4.9 | -5.5 | -4.9 | -0.3 | -5.2  | -5   | -5.2 | -6   | -5.4 | -5.5 | -5.6 | -5.6 | 0.97 |       |      |
| 1353 | -5.9 | -4.5 | -3.9 | -4.5 | -5.4 | -5   | -5.2 | -4.2 | -6.1 | -2.8 | -5.7 | 0    | -5.4 | -4.8 | -5.5 | -1.9 | -4.6 | -6.4 | -5.6 | -6   | 0.9  | -5.8  | -7   | -5.5 | -6.7 | -6.2 | -6.4 | -6.1 | -6.3 | -6.5 | 1.85  |      |
| 1354 | -5.3 | -5.2 | -4.8 | -4.4 | -6.2 | -4.9 | -4.7 | -6   | -6.4 | -4.8 | -4.5 | -4.9 | -4.7 | -5.4 | -5.2 | -5.2 | -5.2 | -4.8 | -5.7 | -4.8 | -3.8 | -6.6  | -5.6 | -5.7 | -5.8 | -5.5 | -5.2 | -5.2 | -5.8 | -5.5 | 0.61  |      |
| 1355 | -6.1 | -6.5 | -5.3 | -5.2 | -5.5 | -5.7 | -4.8 | -5.8 | -6.1 | -5.9 | -5.5 | -6   | -4.8 | -6.2 | -5.9 | -6.5 | -5.3 | -5.7 | -6.2 | -5.6 | -0.2 | -6.9  | -6.4 | -6.7 | -6.1 | -6.3 | -6.1 | -6.3 | -6.4 | -6.3 | 1.17  |      |
| 1356 | -6.3 | -5.9 | -5.4 | -5.2 | -6.1 | -5.5 | -5.1 | -5.6 | -5.9 | -6.4 | -5.8 | -5.1 | -4.9 | -6.8 | -5.8 | -6.5 | -5.3 | -5.4 | -6.2 | -5.9 | -0.7 | -7.4  | -6.7 | -6.7 | -6.2 | -6.4 | -6.2 | -6.5 | -6.6 | -6.6 | 1.14  |      |
| 1357 | -5.5 | -4.6 | -3.3 | -4.2 | -5   | -4.4 | -4.2 | -4.4 | -5.6 | -3.4 | -4.6 | -3.9 | -3.9 | -4.9 | -4.6 | -4.8 | -4   | -4.9 | -5.5 | -5.6 | -1.7 | -5.8  | -6.7 | -5.5 | -6   | -5.9 | -6.2 | -5.8 | -6   | -6.1 | 1.07  |      |
| 1358 | -4.6 | -4.5 | -4.4 | -4.3 | -4.9 | -5.1 | -4.7 | -4.4 | -5   | -4.4 | -4.7 | -4.4 | -4.3 | -4.6 | -4.5 | -4.1 | -4.4 | -4.8 | -5.1 | -5   | -4.4 | -5.4  | -5.3 | -5.1 | -5   | -4.9 | -4.8 | -5.1 | -4.8 | -4.7 | 0.33  |      |
| 1359 | -5   | -4   | -4.2 | -4.4 | -4.8 | -4.5 | -5.1 | -4.4 | -5.2 | -4.5 | -4.7 | -4.5 | -4.8 | -4.6 | -4.8 | -4.1 | -4.9 | -4.7 | -5   | -4.5 | -4.7 | -5.6  | -5.5 | -4.8 | -4.8 | -5.1 | -4.8 | -5   | -4.9 | -5   | 0.36  |      |
| 1360 | -5.1 | -4.7 | -4.3 | -4   | -4.9 | -5   | -4.7 | -4.8 | -5.6 | -4.2 | -5.1 | -4.2 | -4.6 | -4.9 | -4.7 | -4.6 | -4.6 | -4.9 | -5.4 | -5.5 | -1.8 | -5.7  | -5.4 | -5   | -5.4 | -5.3 | -5.2 | -5.4 | -5.3 | -5.4 | 0.73  |      |
| 1361 | -4.9 | -4.7 | -2.5 | -4.3 | -5.3 | -5.3 | -5.1 | -4.1 | -6.5 | -3.7 | -6   | -2.8 | -5.3 | -4.7 | -5.5 | -4.9 | -4.9 | -4.8 | -6.2 | -5.5 | -1.9 | -5.4  | -6.3 | -6   | -6.2 | -6.1 | -5.8 | -6.4 | -6.1 | -6   | 1.17  |      |
| 1362 | -5.2 | -4.1 | -2.5 | 1    | -4.5 | -4.9 | -3.1 | -2.2 | -5.5 | -2.7 | -4.7 | -2.7 | -3.9 | -3.7 | -4.5 | -2.6 | -4.9 | -5.1 | -5.7 | -4.4 | -2.6 | -4.7  | -6.3 | -4.9 | -5.8 | -5.7 | -5.4 | -5.9 | -5.6 | -5.8 | 1.56  |      |
| 1363 | -6.5 | -4.8 | -4.7 | -4.2 | -5.4 | -4.9 | -5.1 | -5.2 | -7.1 | -4.3 | -5.1 | -3.4 | -4.8 | -5.7 | -5   | -4.3 | -4.6 | -5.6 | -6.1 | -5.8 | 7.4  | -4.6  | -6.1 | -6.1 | -6.3 | -6   | -6.2 | -6.6 | -6.5 | -6.4 | 2.50  |      |
| 1364 | -5   | -5   | -5.1 | -4.6 | -5   | -4.9 | -4.8 | -4.8 | -5.5 | -4.5 | -5.1 | -4.4 | -4.8 | -4.8 | -4.7 | -4.8 | -4.8 | -5.4 | -5.6 | -4.7 | -3.8 | -5.3  | -5.1 | -5.3 | -5.4 | -5.2 | -5.1 | -5.1 | -5.1 | -5.2 | 0.36  |      |
| 1365 | -2.9 | -2.7 | -3.3 | -3.2 | -3.1 | -3   | -2.9 | -2.8 | -3   | -3   | -2.9 | -3.4 | -3.2 | -3.4 | -3.1 | -2.8 | -2.8 | -2.9 | -2.8 | -2.8 | -4   | -2.9  | -3.1 | -3.1 | -3   | -2.8 | -2.9 | -2.9 | -2.8 | -3   | 0.26  |      |
| 1366 | -5.1 | -4.8 | -4.8 | -5   | -4.9 | -4.8 | -4.4 | -5   | -5   | -4.7 | -5   | -4.5 | -4.3 | -4.9 | -4.9 | -4.5 | -4.8 | -4.6 | -5   | -4.7 | -4.6 | -5.5  | -5.1 | -5.4 | -4.9 | -4.9 | -5   | -5.1 | -5   | -5.1 | 0.27  |      |
| 1367 | 31   | 17.3 | 41.9 | 59.9 | 24.8 | 47.7 | 25.6 | 28.3 | 39.7 | 60.3 | 36.6 | 67.4 | 41.7 | 43.5 | 45.6 | 33.5 | 25.7 | 15.6 | 9    | 38.6 | 52.4 | 18.5  | -0.3 | 13   | -3.1 | 3.5  | -1.6 | -3.9 | -2.3 | -1.6 | 21.07 |      |
| 1368 | -3.4 | -3.3 | -3.7 | -3.5 | -3.4 | -3.5 | -3.5 | -3.6 | -3.5 | -3.5 | -3.4 | -3.9 | -3.7 | -4   | -3.5 | -3.4 | -3.5 | -3.3 | -3.4 | -3.2 | -3.7 | -4    | -3.5 | -3.8 | -3.5 | -3.3 | -3.4 | -3.4 | -3.4 | -3.4 | 0.20  |      |
| 1369 | -5.9 | -4.8 | -4.5 | -4.1 | -5.9 | -5.8 | -5.8 | -5.1 | -6.2 | -4.5 | -6   | -0.2 | -5.5 | -5.2 | -5.5 | -2.5 | -5.1 | -6.2 | -6.1 | -6   | -1.1 | -5.3  | -6.6 | -5.4 | -6   | -6.5 | -6.4 | -6.7 | -6.6 | -6.1 | 1.53  |      |
| 1370 | -3.9 | -3.1 | -1.7 | -0.5 | -3.5 | -3   | -2.3 | -3.3 | -4.6 | -2   | -3.6 | -2.2 | -3.4 | -3.5 | -3.1 | -1.7 | -2.8 | -2.8 | -4.2 | -2.9 | -1.9 | -4.3  | -4.8 | -3.6 | -4.2 | -4.1 | -4.1 | -4.2 | -4.5 | -4   | 1.03  |      |
| 1371 | -5.1 | -4.5 | -4.7 | -4.4 | -5.3 | -5.4 | -4.3 | -4.7 | -6.5 | -4.9 | -5.4 | -4.4 | -4.6 | -5.3 | -5.7 | -4.1 | -4.4 | -5.1 | -5.2 | -5.1 | -0.1 | -5.9  | -5.8 | -5.6 | -5.4 | -5.7 | -6.4 | -6.5 | -6.3 | -6.5 | 1.18  |      |
| 1372 | -4.4 | -4.1 | -4.7 | -4.4 | -4.2 | -4.3 | -4.2 | -4.4 | -4.3 | -4.3 | -4.2 | -5   | -4.3 | -4.7 | -4.5 | -4.1 | -4.2 | -3.9 | -4.2 | -4.1 | -3   | -4.7  | -4.3 | -4.9 | -4.4 | -4.3 | -4.2 | -4.4 | -4.3 | -4.5 | 0.35  |      |
| 1373 | -2   | 5    | 3.7  | 9.1  | 3.8  | -1   | 9    | 2.8  | -1.3 | 15.2 | 1.8  | 9.8  | 5.2  | 7    | 2.4  | 6.5  | 4.8  | 2.1  | -2.6 | -0.9 | 23.2 | -0.2  | -5.5 | -4.8 | -4.1 | -4.2 | -4.7 | -4   | -5.1 | -4.6 | 6.66  |      |
| 1374 | -5.2 | -4.7 | -5.5 | -4.7 | -4.7 | -4.5 | -4.9 | -5   | -6.6 | -5   | -5.8 | -4.4 | -4.7 | -5.6 | -4.8 | -4.4 | -4.4 | -4.9 | -6   | -4.9 | -4.2 | -5.8  | -6   | -5.3 | -5.4 | -5   | -5.2 | -5.2 | -5.4 | -5.3 | 0.56  |      |
| 1375 | -4.6 | -4.4 | -4.1 | -3.8 | -4.4 | -4.4 | -4.6 | -4.6 | -5.7 | -4   | -5.1 | -3.7 | -4.2 | -5.1 | -4.4 | -4.5 | -4.2 | -4.5 | -4.5 | -4.1 | -4.5 | -4.7  | -4.8 | -4.6 | -4.3 | -4.9 | -4.9 | -5.2 | -4.9 | -5   | 0.43  |      |
| 1376 | -4.8 | -4.1 | -4.7 | -4.4 | -4.3 | -4.3 | -4.3 | -4.5 | -4.3 | -4.3 | -4.7 | -4.3 | -4.9 | -4.3 | -4.1 | -4.3 | -4.5 | -4.3 | -4.2 | -3.1 | -4.7 | -4.3  | -4.6 | -4.7 | -4.5 | -4.5 | -4.4 | -4.6 | -4.6 | -4.8 | 0.33  |      |
| 1377 | -4.6 | -4.2 | -4.9 | -4.3 | -4.2 | -4.5 | -4.2 | -4.4 | -4.5 | -4.3 | -4.5 | -4.2 | -4.2 | -4.9 | -4.6 | -4.7 | -4.2 | -4.7 | -4.4 | -4.2 | -3   | -4.7  | -4.3 | -5   | -4.6 | -4.4 | -4.4 | -4.6 | -4.5 | -4.7 | 0.36  |      |
| 1378 | -5.8 | -4.7 | -3.4 | -1.5 | -5.8 | -5.3 | -5.4 | -4.8 | -7   | -4.1 | -6.1 | -3.5 | -5.9 | -5.6 | -6.7 | -2.1 | -5.6 | -5.2 | -6.1 | -5.1 | 2.4  | -5.3  | -6.2 | -5.4 | -6.4 | -6.1 | -6.1 | -6.3 | -6   | -6.5 | 1.90  |      |
| 1379 | -5.2 | -4.2 | -4.9 | -4.4 | -4.7 | -4.6 | -4.5 | -4.5 | -5.4 | -5.3 | -4.8 | -4.6 | -4.5 | -4.7 | -4.6 | -4.1 | -4.2 | -4.6 | -4.7 | -4.4 | -4   | -5.3  | -5.2 | -4.8 | -5.2 | -4.9 | -4.9 | -5   | -5   | -5.2 | 0.38  |      |
| 1380 | 68.1 | 55.8 | 60   | 63.2 | 63   | 57   | 65.4 | 64.2 | 44.4 | 61.3 | 67   | 59.1 | 59.8 | 55.8 | 48.3 | 64.1 | 67.3 | 49.9 | 56.5 | 63   | 79.4 | 103.8 | 43.9 | 64.7 | 53.5 | 53.3 | 53.5 | 44.3 | 44.4 | 41   | 12.23 |      |
| 1381 | -5.4 | -4.3 | -4.2 | -4.7 | -5.1 | -5.1 | -4.9 | -4.6 | -6.1 | -4.3 | -5.5 | -4.7 | -5   | -4.8 | -5.5 | -4.4 | -4.9 | -5.3 | -5.2 | -5.3 | -2.1 | -5.8  | -5.2 | -5.8 | -5.7 | -5.4 | -5.7 | -5.5 | -5.8 | -5.7 | 0.75  |      |
| 1382 | 25   | 27.2 | 33.7 | 47.3 | 51.5 | 22.2 | 34.6 | 26.8 | 13.3 | 37.7 | 27.6 | 44.3 | 18.9 | 38.6 | 20.6 | 38.9 | 12.8 | 19.9 | 28.4 | 31.5 | 40   | 8.4   | -2.4 | -2.1 | 0    | -1.8 | -1.9 | -2.9 | -3.1 | -1.8 | 17.23 |      |
| 1383 | -5.4 | -2.9 | -3.9 | -3.7 | -5.7 | -5.8 | -4.7 | -3.6 | -6.1 | 2.3  | -5.1 | -0.5 | -4.3 | -3.8 | -4.8 | -0.8 | -3.6 | -4.4 | -5.9 | -6   | 13.4 | -5.1  | -5.5 | -6.5 | -6.7 | -5.9 | -6.4 | -7   | -6.1 | -6.1 | 3.87  |      |
| 1384 | -4.7 | -4.3 | -4.4 | -4.1 | -4.6 | -4.4 | -4.3 | -4.5 | -5.5 | -4.5 | -4.4 | -4.1 | -4.5 | -5   | -4.3 | -4.2 | -4.3 | -4.4 | -4.6 | -4.5 | -2.6 | -5.6  | -4.6 | -5.1 | -4.7 | -4.8 | -4.6 | -4.7 | -4.9 | -4.7 | 0.51  |      |
| 1385 | -4.6 | -4.2 | -4.7 | -4.4 | -4.5 | -4.3 | -4.6 | -4.5 | -5.3 | -4.7 | -4.5 | -4   | -4.6 | -4.1 | -4.5 | -4.2 | -4.4 | -4.7 | -4.7 | -4.5 | -2.6 | -5.4  | -4.9 | -4.7 | -4.7 | -4.8 | -4.6 | -4.7 | -4.7 | -4.6 | 0.48  |      |
| 1386 | -3.5 | -3.8 | -2.6 | -0.8 | -4.6 | -5   | -4.2 | -0.3 | -6.2 | 2.3  | -6.1 | 3.3  | -6.5 | -2.1 | -4.8 | 1.8  | -5.1 | -4.9 | -5.6 | -4.8 | 8.7  | -3.1  | -6.3 | -5.5 | -6.9 | -6.5 | -6.8 | -6   | -6.5 | -6.6 | 1.64  |      |
| 1387 | -4.4 | -4.3 | -4.4 | -4.1 | -4.2 | -4.3 | 4    | -4.6 | -4.5 | -4.3 | -4.4 | -3.9 | -4.1 | -4.7 | -4.6 | -4.4 | -4.3 | -4.1 | -4.3 | -4   | -3.8 | -4.8  | -4.7 | -4.8 | -4.5 | -4.3 | -4.5 | -4.4 | -4.3 | -4.5 | 0.25  |      |
| 1388 | 3.1  | 8.2  | 11.2 | 17.3 | 20.4 | 1.5  | 8.5  | 14.7 | 1.2  | 35.8 | 2.6  | 35.9 | 7.7  | 7.1  | 9.7  | 19.7 | 0    | 6.2  | -1.4 | 9    | 10.9 | 2.3   | -3.4 | -0.2 | -3.8 |      |      |      |      |      |       |      |

|      |      |      |      |       |      |      |      |      |      |      |       |      |       |      |       |      |      |      |      |      |       |      |      |      |      |      |      |      |      |      |       |      |
|------|------|------|------|-------|------|------|------|------|------|------|-------|------|-------|------|-------|------|------|------|------|------|-------|------|------|------|------|------|------|------|------|------|-------|------|
| 1432 | -5.5 | -4.9 | -4.6 | -4.9  | -5   | -5   | -4.5 | -5.1 | -4.9 | -4.9 | -4.6  | -4.5 | -4.5  | -5   | -4.7  | -4.7 | -4.7 | -5   | -5.2 | -4.9 | -3.3  | -5.5 | -5.4 | -5.1 | -5   | -5.5 | -5.1 | -5.3 | -5.5 | -5.4 | 0.44  |      |
| 1433 | -5.1 | -4.5 | -4.8 | -4.6  | -5   | -4.6 | -4.6 | -5   | -5.1 | -4.7 | -4.6  | -4.3 | -4.5  | -4.9 | -4.7  | -4.8 | -4.3 | -4.8 | -5   | -4.8 | -3    | -5.5 | -5.1 | -5.4 | -4.9 | -5.1 | -5.1 | -5   | -5.1 | -5.1 | 0.45  |      |
| 1434 | -5.1 | -1.4 | -0.4 | -2.8  | -2.9 | -3.6 | -2.7 | -3.2 | -5   | -0.5 | -5.3  | -3.6 | -5.8  | -3.9 | -2.7  | 0.3  | -6.7 | -2.2 | -4.1 | -1.3 | 3.2   | -5.1 | -6.1 | -5.8 | -7   | -6.2 | -7.1 | -6.7 | -7.2 | -7.1 | 2.58  |      |
| 1435 | -4.4 | -4.1 | -4.6 | -4.3  | -4.2 | -4.5 | -3.9 | -4.4 | -4.8 | -4.2 | -4.5  | -4.4 | -4.6  | -4.3 | -4.3  | -4.1 | -4.5 | -4   | -4.2 | -3.9 | -4.5  | -5.3 | -4.3 | -5   | -4.4 | -4.2 | -4.4 | -4.3 | -4.3 | 0.29 |       |      |
| 1436 | 65.9 | 41.5 | 63   | 79.8  | 64.4 | 56.5 | 71.5 | 50.6 | 57.4 | 76.7 | 61.9  | 77.3 | 84.8  | 71.6 | 49.9  | 58.1 | 46.4 | 54.3 | 38.3 | 46   | 46.1  | 46.5 | 4.2  | 20.3 | 1.2  | 0.8  | -0.2 | -1.2 | -0.2 | -4.7 | 27.75 |      |
| 1437 | -5.8 | -6.2 | -4.7 | -5.3  | -5.1 | -5.1 | -4.8 | -5.8 | -5.6 | -5.8 | -5.4  | -5.1 | -5.2  | -6.1 | -5.8  | -5.4 | -5.4 | -5.5 | -5.3 | 1.2  | -5.6  | -5.7 | -5.7 | -6.1 | -5.8 | -6.2 | -5.9 | -6   | -6.1 | 1.30 |       |      |
| 1438 | -5.2 | -4   | -3.7 | -0.7  | -5.2 | -4.8 | -3.2 | -3.4 | -6.9 | -4.2 | -6.3  | -0.6 | -6.1  | -3.4 | -4.9  | -3.1 | -4.5 | -5.8 | -6.7 | -5.5 | -1.2  | -5.8 | -7.2 | -6.1 | -6.4 | -7.1 | -6.6 | -6.8 | -7.1 | -6.8 | 1.90  |      |
| 1439 | -4.3 | -4.2 | -4.1 | -4.2  | -4.4 | -4.1 | -4.5 | -4.8 | -5.5 | -3.3 | -4.8  | -3.4 | -4.1  | -4.7 | -4.4  | -4.4 | -3.7 | -5   | -4.8 | -4.5 | -1.1  | -5.3 | -5.1 | -5.1 | -4.7 | -5.4 | -5.2 | -5.2 | -5.3 | -5.3 | 0.86  |      |
| 1440 | -4.8 | -4   | -4.3 | -4.5  | -4.3 | -4.1 | -4.3 | -4.3 | -5.7 | -4.4 | -4.6  | -4.7 | -4.1  | -4.5 | -4.7  | -4   | -4.3 | -4.8 | -4.4 | -3.3 | -5.2  | -4.6 | -5.1 | -4.7 | -4.7 | -4.5 | -4.8 | -4.6 | -4.8 | 0.44 |       |      |
| 1441 | -5.9 | -5.7 | -4.4 | -3.8  | -5.7 | -5.3 | -4.7 | -5.4 | -6   | -4.4 | -6.1  | -3.2 | -6.1  | -6.4 | -6    | -4.3 | -5.9 | -6.3 | -5.8 | -5.5 | -4.1  | -5.5 | -6.4 | -5.6 | -6.5 | -5.8 | -6.6 | -6.1 | -6.4 | 0.89 |       |      |
| 1442 | -5.4 | -4   | -3   | -2.3  | -4.8 | -3.9 | -3.4 | -4   | -6.1 | 0.8  | -5    | 0.7  | -5.8  | -2.8 | -5    | -3.2 | -3.9 | -4.8 | -5.8 | -5.5 | 9.6   | -4.4 | -6.1 | -5.7 | -6   | -6   | -6.1 | -5.8 | -6.7 | -5.8 | 3.15  |      |
| 1443 | -4.9 | -5.5 | -3.8 | -3.9  | -5.2 | -5   | -3.7 | -4   | -5.4 | -4.2 | -4.9  | -3.3 | -4.4  | -4.4 | -4.2  | -2.9 | -3.9 | -5.1 | -5.3 | -4.3 | -3.4  | -4.8 | -5.3 | -4.8 | -5.2 | -4.8 | -5.1 | -4.9 | -4.9 | 5.1  | 0.69  |      |
| 1444 | 25   | 33.5 | 44.4 | 76.4  | 43   | 45.5 | 16.1 | 36.4 | 11.2 | 61.8 | 5.7   | 75   | 30.3  | 39   | 40.3  | 40.4 | 22.9 | 31.4 | 33.3 | 19.8 | 66.3  | 17.3 | -0.5 | 16.7 | -2.1 | -3.6 | -0.4 | -2.1 | -4   | -1.8 | 23.58 |      |
| 1445 | -4.3 | -2.5 | -1.1 | -2    | -4.5 | -4.2 | -2.9 | -2.2 | -5.3 | -2.2 | -3.8  | -2.4 | -2.4  | -3.8 | -3.6  | -0.4 | -3.5 | -4.5 | -4.8 | -4.4 | 6.1   | -3.9 | -4.7 | -4.2 | -5.1 | -4.9 | -4.8 | -4.9 | -5   | -5   | 2.20  |      |
| 1446 | -2.8 | 1.1  | 5.1  | 3.7   | -3.3 | -3.1 | -1.8 | 2.5  | -3.6 | -0.4 | -3    | 1.2  | -0.2  | -0.6 | -1.4  | 1.6  | -1.9 | -3.4 | -4   | -2.3 | 2.2   | -3.2 | -5.2 | -3.8 | -4.7 | -4.6 | -4.2 | -5   | -4.6 | -4.3 | 2.81  |      |
| 1447 | -7   | -5.5 | -3.4 | -2    | -5.7 | -5.8 | -5.1 | -6.4 | -7   | -6   | -6.1  | -2.7 | -5.6  | -6.3 | -4.9  | -3.9 | -6.2 | -6.6 | -5.5 | 2.6  | -5.2  | -7.2 | -6.1 | -6.5 | -7.2 | -6.3 | -7.1 | -6.6 | -6.9 | 1.99 |       |      |
| 1448 | -6.7 | -5.7 | -2   | -2.4  | -5.9 | -5.7 | -5.7 | -5.3 | -7.1 | -3.8 | -5.9  | -0.6 | -4.1  | -5.3 | -5.3  | -5.2 | -4.3 | -5.8 | -7   | -6   | 4.8   | -4.7 | -6.7 | -6.5 | -6.2 | -6.7 | -6.8 | -6.9 | -6.9 | -7.1 | 2.45  |      |
| 1449 | -2.3 | 1.3  | 6.7  | 10.1  | -4.7 | -3   | -2.7 | 11.1 | -5.8 | 2.1  | -2.2  | 4.7  | 5.4   | 12.1 | 1.9   | 7.7  | -2.1 | -4.2 | 3.2  | -2.9 | 2.8   | -0.6 | -6.6 | -3.7 | -5.4 | -5.8 | -5.2 | -5.3 | -5.4 | -5   | 6.76  |      |
| 1450 | -6.5 | -3.2 | -3   | 1.3   | -5.8 | -6.3 | -4.9 | -3.7 | -8.2 | -3.4 | -6.2  | -1.4 | -5.2  | -4.3 | -6.6  | -2.3 | -6.1 | -5.9 | -6.2 | -5.7 | -4.5  | -6.3 | -7.3 | -5.1 | -7.4 | -7.3 | -7.8 | -7.3 | -7   | -7.5 | 2.14  |      |
| 1451 | 89.1 | 89.4 | 85.8 | 107.5 | 97.7 | 93.8 | 99.7 | 99.7 | 88.5 | 9.9  | 104.8 | 95.9 | 107.5 | 87.4 | 103.3 | 85.5 | 97.6 | 82.3 | 93.6 | 97.4 | 102.4 | 76.7 | 13.1 | 59.5 | 34.9 | 33   | 26.7 | 26.1 | 18.1 | 9    | 32.03 |      |
| 1452 | -6   | -5.2 | -4   | -4.4  | -4.7 | -5.5 | -3.8 | -5.1 | -4.7 | -4.5 | -5.5  | -4.1 | -4.2  | -5.1 | -4.7  | -4.6 | -4.8 | -4.6 | -5.7 | -5.4 | 1.8   | -6.2 | -5.1 | -5.9 | -5.7 | -5.8 | -5.4 | -6   | -5.8 | -5.9 | 1.43  |      |
| 1453 | -5.2 | -4.6 | -4.9 | -4.9  | -5.2 | -4.8 | -5.2 | -4.9 | -5.9 | -5.5 | -5.6  | -5.1 | -4.7  | -5   | -4.8  | -4.7 | -4.7 | -5.3 | -5.1 | -4.9 | -4.4  | -5.9 | -5.7 | -5.6 | -5.2 | -5.4 | -5.2 | -5.4 | -5.1 | -5.2 | 0.38  |      |
| 1454 | -5   | -4.3 | -4.9 | -4.2  | -5   | -4.3 | -4.4 | -4.9 | -5   | -4.6 | -4.5  | -4.5 | -4.2  | -5   | -4.5  | -5   | -4.6 | -4.7 | -4.9 | -4.5 | -2.6  | -5.5 | -5   | -5   | -4.9 | -5.1 | -5   | -5   | -5.1 | -5.1 | 0.51  |      |
| 1455 | -4.9 | -4.5 | -4.3 | -5.2  | -4.7 | -5.3 | -4.8 | -4.8 | -5.3 | -5.1 | -5    | -4.4 | -4.9  | -5   | -4.9  | -4.2 | -4.2 | -4.5 | -4.8 | -4.5 | -4.5  | -5.4 | -5.5 | -4.9 | -5.3 | -5.2 | -5.4 | -5.2 | -5.4 | -5.3 | 0.39  |      |
| 1456 | -4.1 | -3.4 | -3.8 | -3.9  | -3.4 | -3.9 | -3.6 | -3.2 | -4.1 | -4   | -3.8  | -3.7 | -3.7  | -3.3 | -3.9  | -3.6 | -3.5 | -3.5 | -3.2 | -3.9 | -4    | -3.3 | -4   | -3.6 | -3.4 | -3.5 | -3.5 | -3.4 | -3.4 | -3.4 | 0.27  |      |
| 1457 | -5.9 | -4.3 | -3.1 | -1.1  | -5.9 | -5.3 | -4.6 | -3.7 | -6.3 | -1.8 | -4.9  | -0.1 | -6.2  | -2.9 | -5.3  | -0.5 | -5.3 | -5.8 | -5.7 | -6.5 | 16.1  | -5   | -6.2 | -5.6 | -6.9 | -6.1 | -6.4 | -6.6 | -6.5 | -6.9 | 4.28  |      |
| 1458 | -3.9 | -3.7 | -4.1 | -4    | -3.8 | -4.1 | -3.6 | -4   | 4    | -3.9 | -3.9  | -4.4 | 4     | -4   | -4.2  | -3.8 | 4    | -3.7 | -3.9 | -3.6 | -4.1  | -5   | -4.2 | -4.6 | -4   | -3.8 | -4   | -3.9 | -3.9 | -4   | 0.28  |      |
| 1459 | -6.4 | -4.5 | -4.6 | -4.4  | -6.2 | -6.1 | -5.1 | -4.4 | -6.9 | -3.5 | -6.2  | -4.7 | -5.4  | -5.1 | -5.4  | -4.5 | -4.3 | -5.8 | -6.6 | -5.5 | 7.1   | -4.9 | -6.8 | -5.7 | -6.6 | -6.4 | -6.5 | -7   | -6.5 | -6.6 | 2.51  |      |
| 1460 | -5.1 | -2.9 | -0.4 | 0.8   | 4    | 4.6  | -3.7 | 2.6  | 5.8  | 0.9  | -4.8  | -1.5 | -4    | -3.2 | -4.2  | -0.2 | -4.3 | -4.5 | -4.9 | -4.3 | 0.3   | -4.1 | -5.4 | -4.6 | -5.1 | -5.4 | -5.2 | -5   | -5.2 | -5.3 | 1.78  |      |
| 1461 | -5.2 | -4.4 | -4.1 | -4.4  | -5.1 | -5   | -4.6 | -5.1 | -6.4 | -3.1 | -5.2  | -4.7 | -4.9  | -5.7 | -5.3  | -3.8 | -5.3 | -4.5 | -5.9 | -4.9 | 3.8   | -5.2 | -5.6 | -5.2 | -5.5 | -5.4 | -5.5 | -5.5 | -5.3 | -5.4 | 1.74  |      |
| 1462 | -4.8 | -4.9 | -4.5 | -5    | -5.2 | -4.9 | -4.9 | -4.8 | -5.8 | -3.1 | -5.2  | -4.1 | -4.5  | -5.7 | -5.1  | -3.1 | -3.9 | -5.1 | -5.3 | -5.2 | -2.7  | -5   | -6.1 | -5.4 | -5.7 | -5.6 | -5.6 | -5.9 | -6   | -5.4 | 0.85  |      |
| 1463 | -5   | -4.5 | -4.4 | -4.3  | -5.1 | -4.3 | -4.2 | -5.2 | -6.2 | -4.9 | -4.9  | -5.2 | -4.2  | -4.9 | -5    | -5.4 | -3.8 | -5.2 | -4.7 | -5.1 | -4.7  | 3.5  | -4.6 | -5.7 | -5.3 | -5.6 | -5.3 | -5.5 | -5.4 | -5.5 | -5.5  | 1.64 |
| 1464 | -5.1 | -4.7 | -3.8 | -3.7  | -5   | -4.6 | -4.7 | -4.5 | -5.9 | -4.2 | -5.4  | -3.4 | -5.1  | -5.7 | -5.5  | -3.8 | -5.5 | -4.4 | -5.4 | -4.8 | 3.4   | -5.7 | -5.8 | -5.1 | -5.6 | -5.2 | -5.4 | -5.3 | -5.4 | -5.4 | 1.67  |      |
| 1465 | -5.2 | -5.1 | -5   | -4.7  | -5   | -4.7 | -4.9 | -5.3 | -5.7 | -4.7 | -5.4  | -3.6 | -4.5  | -5.2 | -5.5  | -3.3 | -5.1 | -5.1 | -5   | -4.9 | 3.3   | -5.9 | -5.8 | -5   | -5.8 | -5.7 | -5.6 | -5.7 | -5.5 | -5.6 | 1.65  |      |
| 1466 | -5.1 | -4.9 | -4.6 | -5    | -5.1 | -5.6 | -4.8 | -4.8 | -5.8 | -3.9 | -5.1  | -4.3 | -4.6  | -4.5 | -5.4  | -3.9 | -4.5 | -5.2 | -5.3 | -5.4 | -2.6  | -5.2 | -5.6 | -5.2 | -5.5 | -5.6 | -6   | -5.5 | -6   | -5.4 | 0.71  |      |
| 1467 | -5.3 | -4.2 | -4.6 | -4.4  | -4.8 | -4.4 | -4.9 | -4.6 | -5   | -4.8 | -4.7  | -4.4 | -4.5  | -5   | -4.9  | -4.3 | -4.2 | -4.6 | -4.7 | -4.6 | -3.6  | -5.3 | -5   | -5.1 | -5.1 | -5.2 | -4.9 | -5.2 | -5.3 | -5.4 | 0.41  |      |
| 1468 | -5.6 | -4.5 | -4.6 | -4.2  | -4.7 | -4.6 | -4.6 | -4.5 | -5.2 | -4.7 | -4.6  | -4.4 | -4.3  | -4.7 | -4.8  | -4.9 | -4.3 | -4.7 | -4.8 | -4.6 | -3.7  | -5.3 | -4.7 | -4.8 | -5.2 | -5.2 | -5.2 | -5.5 | -5.7 | -5.5 | 0.45  |      |
| 1469 | -5.4 | -5.1 | -5.5 | -4.8  | -5   | -5   | -4.6 | -5.4 | -4.8 | -5   | -4.4  | -4.7 | -4.8  | -5.4 | -4.8  | -5.5 | -4.8 | -4.6 | -5   | -4.6 | -3.4  | -5.8 | -5.3 | -5.6 | -5   | -5.3 | -5.2 | -5.5 | -5.3 | -5.3 | 0.47  |      |
| 1470 | -5.4 | -5.2 | -4.8 | -4.6  | -5.4 | -4.9 | -4.8 | -5.4 | -4.9 | -4.9 | -5.3  | -4.6 | -4.8  | -5.5 | -5    | -5.1 | -5.2 | -5.1 | -3.2 | -6   | -5.6  | -5.6 | -5.5 | -5   | -5.3 | -5.2 | -5.3 | -5.2 | -5.3 | 0.47 |       |      |
| 1471 | -5.6 | -4.3 | -3.2 | -4.4  | -5.4 | -5.3 | -4.3 | -4.1 | -6.3 | -5.2 | -5.6  | -3.8 | -5.5  | -6.1 | -5    | -4.2 | -5.1 | -5.8 | -5.5 | -5.5 | -4.3  | -5.8 | -5.8 | -5.6 | -5.6 | -6.1 | -6.4 | -6.6 | -6.2 | -5.9 | 0.85  |      |
| 1472 | -5.6 | -5.7 | -0.8 | 7.6   | -6.1 | -6.1 | -5.9 | 0.8  | -7.2 | 14.7 | -6.7  | 1.9  | -3.8  | 0.8  | -5.8  | 1.3  | -4.4 | -5.8 | -5.9 | -5.4 | 1.4   | -4.7 | -7.8 | -6.1 | -7.3 | -6.6 | -6.8 | -6.6 | -6.4 | -6.6 | 5.04  |      |
| 1473 | -5.3 | -4.4 | -4   | -3.5  | -5.1 | -5.3 | -5.1 | -4.2 | -5.3 | -4.1 | -4.8  | 0.6  | -5.1  | -3.8 | -4.9  | -1.6 | -3.9 | -5.5 | -5.8 | -5.6 | -4    | -5.7 | -6.6 | -6.2 | -5.7 | -6.1 | -5.6 | -6.3 | -5.6 | -5.5 | 1.45  |      |
| 1474 | -5.5 | -4.2 | -5   | -3.5  | -6.3 | -5.6 | -4.4 | -4   | -5.7 | -3.7 | -5.6  | -4.6 | -4.3  | -4.8 | -5.6  | -3.2 | -4.4 | -4.7 | -6.3 | -5.9 | 0.7   | -6.5 | -6.6 | -6.3 | -6   | -5.9 | -6.1 | -5.8 | -6   | -5.6 | 1.44  |      |
| 1475 | -4.4 | -4   | -4   | -2.9  | -3.8 | -3.8 | -4.9 | -3.4 | -5   | -3.1 | -4.7  | -3.7 | -5    | -5.8 | -5.1  | -4.1 | -4.1 | -5.5 | -5.2 | -4.1 | -2.2  | -5.4 | -6   | -5.4 | -5.8 | -6.2 | -6.3 | -6.2 | -6.3 | -6.2 | 1.12  |      |
| 1476 | -5.5 | -5.2 | -6.2 | -5.2  | -5.4 | -5.2 | -4.9 | -5.2 | -5.8 | -5.1 | -4.7  | -5.4 | -5    | -5.4 | -5.2  | -4.9 | -4.7 | -4.9 | -5.4 | -5.5 | -0.4  | -5.8 | -6.3 | -5.9 | -5.5 | -5.7 | -5.8 | -5.7 | -5.7 | -5.9 | 1.00  |      |
| 1477 | -6.9 | -6.1 | -5.8 | -5.2  | -5.7 | -6   | -5.3 | -6.8 | -5.9 | -6   | -5.4  | -5.3 | -5.2  | -6.4 | -6.1  | -5.9 | -5.4 | -5.6 | -6.5 | -5.8 | -1.1  | -6.7 | -6.4 | -6.7 | -6.6 | -6.8 | -6.6 | -6.9 | -7   | 7.1  | 1.09  |      |
| 1478 | -3.4 | -3.4 | -3.8 | -3.8  | -3.4 | -3.7 | -3.4 | -3.3 | -3.9 | -3.7 | -3.5  | -3.5 | -3.5  | -3.9 | -3.4  | -3.5 | -3.5 | -3.6 | -3.5 | -3.1 | -4.4  | -4.2 | -3.6 | -4   | -3.7 | -3.3 | -3.5 | -3.4 | -3.3 | -3.5 | 0.28  |      |
| 1479 | -6.1 | -5.1 | -3.2 | -3    | -5.7 | -5.4 | -4.3 | -4.4 | -5.6 | -4.2 | -5    | -3.7 | -4.9  | -5.4 | -4.6  | -4.2 | -5.5 | -5.9 | -5.4 | -3.3 | -5.8  | -6.3 | -5.2 | -6.1 | -5.8 | -5.9 | -6   | -5.9 | -6.1 | 0.94 |       |      |
| 1480 |      |      |      |       |      |      |      |      |      |      |       |      |       |      |       |      |      |      |      |      |       |      |      |      |      |      |      |      |      |      |       |      |

|      |      |      |      |      |      |      |      |      |      |      |      |      |      |      |      |      |      |      |      |      |      |      |      |      |      |      |      |      |      |      |       |
|------|------|------|------|------|------|------|------|------|------|------|------|------|------|------|------|------|------|------|------|------|------|------|------|------|------|------|------|------|------|------|-------|
| 1522 | -6.3 | -5.6 | -5   | -5   | -6.2 | -4.7 | -5   | -5.6 | -7.3 | -5   | -6.2 | -5   | -4.8 | -6.1 | -5.3 | -4.4 | -5.5 | -5.2 | -5.5 | -5.2 | -0.4 | -5.6 | -6.7 | -5.9 | -6.2 | -6.4 | -7.1 | -7.1 | -7.1 | -7.4 | 1.30  |
| 1523 | -6   | -3.4 | -2.2 | -3.3 | -5.2 | -5.3 | -3.9 | -2.1 | -7   | 2.5  | -6   | 1.3  | -5.6 | -2   | -5.3 | -1.4 | -5.2 | -5.5 | -5.7 | -4.9 | -4.7 | -6.1 | -5.8 | -5.8 | -6   | -6.1 | -6.4 | -6.2 | -6.4 | -6.1 | 2.29  |
| 1524 | -5.5 | -1.3 | -1.6 | -1.8 | -5.2 | -4.7 | -4.8 | -1.6 | -6.8 | -1.4 | -4.9 | 2    | -3.6 | -0.7 | -4.8 | 2.5  | -4.3 | -5.4 | -5.4 | -5.2 | -3   | -5.1 | -6.3 | -5.5 | -6.1 | -6   | -5.9 | -6   | -6.4 | -6.1 | 2.61  |
| 1525 | -6.2 | -5.8 | -5.8 | -5   | -5.6 | -6   | -5.2 | -6.5 | -5.4 | -5.6 | -4.8 | -6.3 | -5.4 | -5.9 | -5.6 | -5.5 | -6.1 | -5.4 | -6.9 | -6   | 2.8  | -6.5 | -6.1 | -6.5 | -5.7 | -7.1 | -5.5 | -6.7 | -6.7 | -6.3 | 1.69  |
| 1526 | -6.1 | -5   | -4.2 | -4.8 | -5.4 | -5.1 | -5   | -5.3 | -6.2 | -5.6 | -4.9 | -4.5 | -4.4 | -5.7 | -4.7 | -5.8 | -5.2 | -5   | -4.8 | -6   | -5.7 | -5.8 | -6.2 | -6.2 | -6.5 | -6.4 | -6.5 | -6.6 | -6.5 | 0.69 |       |
| 1527 | -6.5 | -4.7 | -3   | -3.8 | -6.4 | -6.4 | -5.5 | -1.9 | -7.2 | -2.9 | -7.3 | 0.8  | -6.3 | -2   | -7   | -3.5 | -6   | -5.8 | -6.8 | -6.3 | -4.7 | -4.3 | -7   | -5   | -6.9 | -6.9 | -6.5 | -6.8 | -6.4 | -6.9 | 2.69  |
| 1528 | -5.5 | -5.1 | -3.2 | -1.6 | -5.6 | -5.8 | -4.6 | -4.1 | -6.8 | -2.5 | -6   | -0.2 | -6   | -4.6 | -6.3 | -5   | -5.2 | -5   | -6.1 | -5.5 | -0.6 | -6.1 | -7   | -5.4 | -6.9 | -6.2 | -6.6 | -7   | -6.5 | -6.7 | 1.82  |
| 1529 | -5.4 | -3.9 | -3.6 | -2.4 | -4.1 | -4.9 | -3.6 | -4.4 | -5.2 | -2.7 | -5.4 | -3.7 | -5   | -4.9 | -4.5 | -3.8 | -4.1 | -4.2 | -5.7 | -4.3 | -1.8 | -5.3 | -5.6 | -5   | -5.5 | -6   | -6.1 | -5.8 | -5.5 | -5.8 | 1.09  |
| 1530 | -5.9 | -3.6 | -4.5 | -3.4 | -6   | -5.9 | -5.2 | -4.3 | -6.9 | -4   | -6.6 | 0.1  | -5.5 | -4.2 | -6.1 | -2.5 | -5.9 | -5.3 | -7   | -6.3 | -3   | -6.1 | -6.7 | -6.1 | -7.1 | -6.9 | -6.5 | -6.8 | -6.7 | -7.1 | 1.67  |
| 1531 | -5.6 | -3.7 | -2.3 | -3.5 | -4.7 | -4.9 | -4.8 | -4.4 | -5.9 | -4.7 | -5.1 | -1.9 | -4.5 | -5.2 | -5.4 | -2.9 | -4.8 | -6.1 | -5.4 | -5.1 | 10.3 | -4.9 | -5   | -4.9 | -5.8 | -5.3 | -6.1 | -5.5 | -5.4 | -5.6 | 2.94  |
| 1532 | -6.5 | -2.6 | 0.2  | 3.5  | -5.6 | -6   | -4   | 1.6  | -7.6 | 2.1  | -6   | -2.5 | -3.8 | 6.8  | -6.3 | 3.5  | -4.8 | -6.4 | -4.6 | -5.6 | -0.2 | -3.5 | -1.6 | -6.2 | -4.6 | -6.7 | -6.6 | -6.5 | -6.4 | -6.5 | 3.85  |
| 1533 | -6.5 | -3.5 | 3.7  | 0.4  | -5.8 | -5.3 | -4.1 | 1.4  | -6.7 | 8.4  | -4.8 | 2.8  | -4.6 | -5.1 | -5.4 | 6.8  | -4.8 | -5.7 | -6.3 | -6.9 | -3.4 | -2.2 | -6   | -3.7 | -6.3 | -6.7 | -6.1 | -6.9 | -7.2 | -6.6 | 4.47  |
| 1534 | -4.7 | -4.5 | -3.6 | -3.7 | -5.7 | -4.3 | -4.2 | -4.8 | -5.7 | -4.3 | -5.1 | -4.2 | -4.4 | -5   | -4.6 | -4.3 | -4.4 | -5   | -4.9 | -4.6 | -3.3 | -5.5 | -6   | -5.2 | -5.5 | -5.5 | -5.3 | -5.7 | -6   | -5.6 | 0.71  |
| 1535 | 13.4 | 25.4 | 34.9 | 46.4 | 43.4 | 43.5 | 18.7 | 35.2 | 25.8 | 55.2 | 31.2 | 55.9 | 37.1 | 32   | 49.6 | 32.4 | 18.1 | 14.5 | 36.4 | 28.7 | 57.1 | 31   | -0.9 | 4.4  | -4.4 | 1.3  | -1.8 | -3.4 | -4.4 | -6   | 19.93 |
| 1536 | -4.9 | -3.5 | -2.1 | -2.2 | -4.6 | -4.2 | -3   | -2.8 | -6.5 | -1.7 | -4.5 | -1.7 | -3.3 | -2.2 | -4.2 | -0.8 | -4   | -5.5 | -5.5 | -5.7 | -1.5 | -5.7 | -6   | -5.7 | -6.6 | -5.9 | -6.5 | -6.1 | -5.9 | -6.1 | 1.78  |
| 1537 | -5.3 | -4.4 | -5   | -4.1 | -5.3 | -5.1 | -4.4 | -5   | -5.8 | -5.1 | -4.8 | -3.8 | -5   | -5.4 | -4.8 | -3.9 | -4.7 | -5.2 | -5.4 | -4.8 | 1.3  | -5.7 | -5.8 | -6.3 | -5.8 | -5.8 | -6.2 | -5.6 | -6   | -6.1 | 1.36  |
| 1538 | -4.1 | -3.6 | -4.1 | -3.4 | -4.4 | -4.2 | -4.3 | -3.9 | -5.4 | -3.8 | -4.4 | -3.5 | -4.6 | -4   | -4.5 | -3.4 | -3.8 | -4.2 | -5.1 | -4.3 | -1.7 | -4.8 | -5.6 | -4.7 | -5.1 | -5.5 | -5.4 | -4.8 | -5.6 | -5.2 | 0.84  |
| 1539 | -5.2 | -3.2 | -1.6 | 7.8  | -4.5 | -3.8 | -3.7 | -0.6 | -6.2 | -2.6 | -5.1 | 5    | -5   | -0.8 | -5.4 | 2.6  | -4.7 | -4.2 | -5.8 | -5.9 | -3.9 | -4.1 | -5.7 | -5.1 | -6.5 | -5.9 | -5.9 | -6.4 | -5.7 | -6.4 | 3.60  |
| 1540 | -4.4 | -3.6 | 0.7  | 2    | -1.3 | -4.1 | -0.1 | -3.5 | -4.7 | 5.1  | -3.2 | 0.1  | -2.6 | -2.2 | -1.2 | -3.6 | -3.1 | -5   | -4.4 | -4.5 | 10   | -5.1 | -6.1 | -5.6 | -5.4 | -6   | -5.5 | -6.1 | -5.9 | -5.7 | 3.62  |
| 1541 | -6.2 | -5.6 | -5.4 | -3.2 | -5.2 | -5.2 | -6   | -6   | -4.4 | -5.2 | -6   | -5.2 | -6.3 | -6.2 | -5.3 | -5.6 | -5.4 | -5.9 | -5.2 | 0.2  | -6.7 | -6.4 | -7.2 | -6.8 | -6.1 | -6.4 | -6.7 | -6.3 | -6.7 | -6.3 | 1.36  |
| 1542 | -5.5 | -5.1 | -5.2 | -3.8 | -5.5 | -5.4 | -4.6 | -4.5 | -5.3 | -4.8 | -5   | -4.1 | -4.5 | -5.5 | -4.9 | -4.5 | -4.6 | -5   | -5.5 | -5.1 | -3.1 | -5.7 | -5.4 | -5.4 | -5.6 | -5.3 | -5.9 | -5.4 | -5.6 | -5.7 | 0.62  |
| 1543 | -5.6 | -4.6 | -4.6 | -3.7 | -5.6 | -5.2 | -4.7 | -4.8 | -5   | -5   | -5.4 | -4.5 | -4.4 | -5   | -4.7 | -4.1 | -4.9 | -5.6 | -5.8 | -5.4 | -1.4 | -6.1 | -5.6 | -5.4 | -5.6 | -5.6 | -5.9 | -5.9 | -5.6 | -5.8 | 0.90  |
| 1544 | -5   | -5.2 | -4.8 | -4.9 | -5.4 | -5.7 | -4.4 | -4.3 | -5   | -5.2 | -5.4 | -3.5 | -5   | -5.5 | -5.1 | -4.9 | -5.3 | -5.1 | -5.8 | -5.1 | -2   | -6.9 | -5.1 | -5.5 | -5.4 | -5.3 | -5.2 | -5.3 | -5.2 | -5.3 | 0.80  |
| 1545 | -5.5 | -4.7 | -4.6 | -3.8 | -5.6 | -5.2 | -4.1 | -4.9 | -5.4 | -4.7 | -5.3 | -4.4 | -4.4 | -4.8 | -5   | -3.7 | -4.2 | -4.6 | -6.1 | -5.3 | -2.1 | -6.2 | -6   | -5.8 | -5.2 | -5.4 | -5.2 | -5.3 | -5   | -5.3 | 0.83  |
| 1546 | -5.4 | -5.2 | -6.1 | -5.2 | -5.3 | -5.1 | -5.1 | -5.2 | -5.7 | -5.1 | -4.7 | -5.6 | -5.2 | -5.5 | -5.1 | -4.9 | -4.7 | -4.8 | -5.2 | -5.6 | -0.3 | -6.1 | -6.3 | -5.8 | -5.8 | -5.6 | -5.7 | -5.6 | -5.9 | -5.8 | 1.02  |
| 1547 | -5.5 | -4.2 | -4.8 | -3.1 | -6.1 | -4.7 | -4.6 | -4.5 | -6.8 | -2.7 | -6.1 | -3.5 | -4.5 | -5.1 | -5.5 | -4.5 | -5.3 | -4.9 | -5.1 | -5.4 | 4.6  | -4.7 | -7.2 | -5.3 | -6.4 | -6.5 | -6.4 | -7.3 | -6.6 | -7   | 2.15  |
| 1548 | -6.2 | -4.5 | -4.1 | -4   | -6.4 | -5.6 | -5.8 | -4.4 | -7   | -4.5 | -6.5 | -3.3 | -4.9 | -4.8 | -6   | -3.3 | -5.1 | -6   | -6.9 | -5.6 | 2    | -4.4 | -6.9 | -5.7 | -6.3 | -6.6 | -6.6 | -7.2 | -6.5 | -6.8 | 1.79  |
| 1549 | -5.5 | -5.5 | -4.3 | -4.1 | -5.1 | -5   | -4.1 | -5.5 | -5.1 | -4.8 | -4.5 | -4.2 | -4.6 | -5   | -4.7 | -5   | -4.9 | -4.7 | -5   | -4.9 | -1.8 | -5.7 | -5.6 | -5.8 | -5.3 | -5.2 | -5.6 | -5.5 | -5.6 | -5.6 | 0.77  |
| 1550 | -5.3 | -4.1 | -1   | -4.5 | -4.1 | -5.2 | -5   | -4.9 | -5.6 | -2.5 | -4.7 | 0.6  | -5.3 | -4.4 | -4.9 | -2.8 | -4.4 | -4.4 | -5.9 | 5    | 7.8  | -4.1 | -5.4 | -6   | -5.5 | -5.1 | -5.9 | -6.2 | -6.1 | -6   | 2.72  |
| 1551 | -4.1 | -4.9 | -4.2 | -4.2 | -3.9 | -4.2 | -4.3 | -5.2 | -5.4 | -3.4 | -4.5 | -4.3 | -3.3 | -5.2 | -4.5 | -4.3 | -4.4 | -4.2 | -4.7 | -4.2 | 3.9  | -5.6 | -5.4 | -5.2 | -4.6 | -5.2 | -4.9 | -4.7 | -4.6 | -4.4 | 1.64  |
| 1552 | -5.7 | -5   | -4.9 | -5.3 | -5.7 | -6.2 | -4.9 | -5.5 | -5.5 | -5.1 | -5.7 | -4.9 | -5   | -5.2 | -5.6 | -4.9 | -5   | -5.5 | -5.8 | -5.1 | -4.3 | -6.1 | -5.7 | -5.5 | -5.8 | -5.6 | -5.7 | -5.4 | -5.7 | -5.7 | 0.42  |
| 1553 | -4.6 | -3.3 | -2.9 | -2.2 | -4.5 | -5.4 | -4.7 | -3.7 | -5.7 | -0.4 | -6   | -0.6 | -4.1 | -4.5 | -4.7 | -1.7 | -5.1 | -4.7 | -4.5 | -5.2 | 7.3  | -4.5 | -5.5 | -4.6 | -5.9 | -5.1 | -5.6 | -5.7 | -5.9 | -5.6 | 2.60  |
| 1554 | -5.1 | -4.1 | -4.2 | -3.4 | -4.3 | -4.2 | -3.7 | -4.1 | -5   | -4.3 | -4   | -3.8 | -4.7 | -4.8 | -4.1 | -3.9 | -3.9 | -5   | -4.5 | -3.2 | -4.8 | -5.8 | -4.7 | -5   | -4.6 | -4.8 | -5.1 | -4.8 | -4.6 | -4.6 | 0.57  |
| 1555 | -4.4 | -4.3 | -4.3 | -4   | -4.5 | -4   | -4   | -4.3 | -4.8 | -4.5 | -4.1 | -4.1 | -4.5 | -4.7 | -4.1 | -3.8 | -4.2 | -4.3 | -4.5 | -4.1 | -4.1 | -4.9 | -5.1 | -4.6 | -4.6 | -4.5 | -4.6 | -4.5 | -4.6 | -4.5 | 0.30  |
| 1556 | -5.2 | -4.8 | -3.1 | -2.2 | -4.6 | -4   | -0.8 | -3   | -6.4 | -0.5 | -5.5 | -2.6 | -4.9 | -4.3 | -4.1 | -0.6 | -3   | -4.6 | -7   | -5.2 | 5.9  | -4.9 | -6.4 | -4.6 | -5.7 | -6   | -6.1 | -7   | -6.4 | -6.1 | 2.62  |
| 1557 | -4.4 | -3.7 | -3.6 | -2   | -4.5 | -4.5 | -2.8 | -3.8 | -7.1 | -1.5 | -5   | -1.6 | -3.7 | -3.1 | -4.6 | 0.8  | -3.5 | -5.4 | -5.6 | -6   | -2.2 | -4.6 | -6   | -5.7 | -7   | -5.7 | -6.1 | -6.6 | -5.8 | -6   | 1.84  |
| 1558 | -4.1 | -3.7 | -4.1 | -4.2 | -3.8 | -4.1 | -3.7 | -3.7 | -3.8 | -3.9 | -4.1 | -3.9 | -4.1 | -4.3 | -4   | -3.5 | -3.7 | -3.8 | -3.3 | -4.2 | -4   | -3.9 | -4.2 | -3.9 | -3.6 | -4   | -3.8 | -3.9 | -4.1 | 0.23 |       |
| 1559 | -5.4 | -4.7 | -2.3 | -0.6 | -5.5 | -4.8 | -5.1 | -3.1 | -6.7 | -1   | -5.8 | 1    | -5.1 | -1.4 | -4.8 | 0.3  | -4.9 | -5.3 | -5.5 | -4.9 | 0.2  | -4.6 | -6.8 | -4.9 | -5.5 | -5.7 | -6   | -6.3 | -5.6 | -5.8 | 2.23  |
| 1560 | -5.4 | -4.7 | -4.7 | -4.9 | -4.9 | -5.1 | -4.6 | -5   | -4.8 | -5.2 | -5.5 | -4.4 | -4.6 | -5.5 | -5.4 | -4.8 | -4.8 | -5   | -5.2 | -4.9 | 0.9  | -5.7 | -5.2 | -5.3 | -5.7 | -5.5 | -5.6 | -5.5 | -5.6 | -5.7 | 1.17  |
| 1561 | -5.4 | -4.8 | -5.1 | -4.9 | -5   | -4.7 | -4.7 | -4.7 | -4.9 | -4.7 | -4.7 | -4.4 | -4.4 | -5.4 | -4.5 | -4.6 | -5.1 | -4.7 | -5.1 | -4.5 | -2   | -5.3 | -4.8 | -5.7 | -5   | -5.4 | -5.4 | -5.2 | -5.4 | -5.4 | 0.65  |
| 1562 | -2.2 | 8.4  | 6.4  | 13.2 | -0.5 | 0    | 0.2  | 8.5  | -2.4 | 17.5 | -2.1 | 25.6 | 4.4  | 9.5  | 1.4  | 13.6 | 3.7  | -2.7 | -0.4 | 1.2  | 27.6 | 2.7  | -5.3 | -4.3 | -6   | -5.6 | -6.3 | -6.4 | -6.2 | -6.5 | 9.18  |
| 1563 | -4.8 | -4.4 | -2.2 | -1.4 | -4.5 | -4.4 | -3.9 | -3.9 | -5.9 | -3.7 | -4.9 | 6.8  | -4.2 | -4.6 | -4.2 | -3.6 | -4.2 | -3.4 | -5.3 | -4.7 | -2.6 | -5.3 | -6.3 | -5.9 | -6.1 | -6.3 | -6   | -6.1 | -6.2 | -6.2 | 2.45  |
| 1564 | -4.9 | -4.3 | -4.3 | -5   | -4.1 | -4.3 | -4.8 | -4.3 | -4.6 | -4   | -4.6 | -4.2 | -5.2 | -5   | -4.1 | -4.2 | -4.3 | -4.8 | -4.3 | 0.4  | -5.5 | -4.9 | -5.4 | -5.1 | -4.9 | -5.4 | -5.1 | -5   | -5.1 | -5   | 1.01  |
| 1565 | -5.2 | -4.7 | -4.9 | -4   | -4.2 | -4   | -4.2 | -4   | -4.1 | -5   | -4.1 | -4.5 | -4   | -4.3 | -4   | -4.6 | -4.3 | -5   | -4.5 | -0.5 | -5.6 | -5.4 | -5.2 | -5.4 | -5   | -5   | -5   | -5.2 | -5.4 | 0.91 |       |
| 1566 | -4.3 | -5.2 | -3.2 | 5.8  | 2.5  | -3.6 | -2.3 | -5.9 | 2    | -5.6 | 4.6  | -2.8 | -4.2 | -2.9 | 0.3  | -5.2 | -6.3 | -5.2 | -5.2 | -5.2 | -3.2 | -2.6 | -5.7 | -5.2 | -6   | -4.6 | -5.5 | -5.4 | -5.6 | -6.1 | 4.37  |
| 1567 | -6.2 | -5.9 | -5.1 | -4.7 | -5.5 | -5.4 | -5.1 | -5.8 | -6.3 | -4.7 | -5.2 | -5.2 | -4.7 | -5.8 | -5.8 | -6.1 | -5.2 | -5.2 | -6.1 | -5.8 | -1.7 | -6.3 | -6.5 | -5.9 | -6.6 | -5.8 | -6.5 | -6.4 | -6.2 | 0.95 |       |
| 1568 | -6.3 | -5.2 | -5.7 | -5.6 | -6   | -5.7 | -5   | -5.6 | -6.2 | -5.7 | -6   | -4.9 | -5.4 | -5.5 | -5.4 | -5   | -5.1 | -6.2 | -6.4 | -5.8 | -4.2 | -6.7 | -6.4 | -6.2 | -6.1 | -6.2 | -6.1 | -6.6 | -6.3 | -6.3 | 0.58  |
| 1569 | -6.3 | -5.1 | -5.7 | -5.4 | -5.9 | -5.9 | -5.2 | -5.3 | -6.6 | -5.1 | -6.1 | -5.3 | -4.9 | -6.1 | -5.7 | -4.9 | -5.1 | -6.1 | -6.3 | -6.2 | -4.4 | -6.8 | -6.6 | -6.2 | -6.4 | -6.3 | -6.3 | -6.4 | -6.3 | -6.4 | 0.62  |
| 1570 | -4.6 | -4.1 | -4.3 | -3.4 | -4.9 | -4.6 | -4.1 | -4.7 | -6   | -5   | -4.5 |      |      |      |      |      |      |      |      |      |      |      |      |      |      |      |      |      |      |      |       |

|      |      |      |       |       |      |      |      |      |      |       |      |       |       |       |      |       |       |      |      |      |      |      |      |      |      |      |      |      |      |      |       |
|------|------|------|-------|-------|------|------|------|------|------|-------|------|-------|-------|-------|------|-------|-------|------|------|------|------|------|------|------|------|------|------|------|------|------|-------|
| 1622 | -4.4 | -4   | -4    | -4.2  | -4.3 | -4.6 | -4.2 | -4.4 | -5.2 | -3.9  | -5.1 | -4.9  | -4.4  | -4.8  | -4.6 | -3.7  | -4.1  | -4.3 | -5.2 | -4.2 | -3.2 | -4.5 | -5.3 | -5.1 | -4.9 | -5   | -5.1 | -4.5 | -5   | -5.1 | 0.51  |
| 1623 | -4.6 | -4.2 | -4.6  | -4.4  | -4.3 | -4.7 | -4.2 | -4.3 | -5.8 | -4.4  | -4.5 | -4.7  | -4.4  | -4.8  | -4.4 | -4.3  | -4.3  | -4.7 | -5.2 | -4.4 | -4   | -5.2 | -5.1 | -4.8 | -4.9 | -5   | -5.4 | -4.9 | -4.8 | -4.8 | 0.40  |
| 1624 | -3.5 | -3.4 | -3.5  | -3.9  | -3.3 | -3.8 | -3.6 | -3.7 | 4    | -3.8  | -3.6 | -3.8  | -3.7  | -3.6  | -3.3 | -3.6  | -3.5  | -3.3 | -3.5 | -3.5 | -3.9 | -4.1 | -3.6 | -3.8 | -3.6 | -3.1 | -3.3 | -3.3 | -3.2 | -3.4 | 0.24  |
| 1625 | -5.7 | -3.9 | -1.7  | -1.7  | -5.9 | -6   | -3.7 | -1.9 | -5.9 | 0.7   | -6.5 | -1.8  | 4     | -1.1  | -6   | 1.3   | -3.1  | -5.2 | -6.5 | -5.7 | -1.6 | -5   | -6.4 | -5.8 | -6.4 | -7.1 | -6.5 | -6.8 | -6.2 | -6.5 | 2.39  |
| 1626 | -5.2 | -4.2 | -3.7  | -3.4  | -5.2 | -4.8 | -5   | -3.8 | -6.1 | -2.9  | -4.6 | -3.5  | -4.7  | -4.6  | -4.3 | -4.2  | -5.1  | -5   | -4.5 | -4.2 | -3.6 | -4.7 | -5.8 | -5.6 | -5.5 | -5.2 | -4.9 | -5   | -5.4 | -5.7 | 1.70  |
| 1627 | -4.5 | -4.7 | -4.8  | 4     | -5.2 | -4.4 | -5   | -4.8 | -6.1 | -4.4  | -4.6 | -4.1  | -4.1  | -4.6  | -4.7 | -3.8  | -4.6  | -5.2 | -4.9 | -4.7 | -3.2 | -5.4 | -5.9 | -5.7 | -5.4 | -5.5 | -5.3 | -5.7 | -5.6 | -5.9 | 0.69  |
| 1628 | -5.9 | -5.7 | -5.5  | -4.7  | -5.9 | -5.4 | -4.8 | -6   | -5.4 | -6.2  | -5.2 | -4.9  | -4.6  | -5.4  | -5.5 | -5.8  | -5.5  | -5.1 | -6   | -5.5 | -4.1 | -6.3 | -5.8 | -6.2 | -6   | -6.1 | -6   | -5.8 | -5.9 | -5.9 | 0.54  |
| 1629 | -4.7 | -3.3 | -0.9  | -1.9  | -3.7 | -4.2 | -3.5 | -4.1 | 4    | -2.4  | -4.8 | 0.2   | -4.3  | -3.5  | -4.6 | -3.3  | -4.3  | -3.8 | -3.6 | -4.1 | -5.1 | -5.2 | -6   | -5.6 | -5.3 | -6.4 | -5.6 | -6.3 | -5.7 | -5.5 | 1.51  |
| 1630 | -5.2 | -4.9 | -4.5  | -4.8  | -4.5 | -4.4 | -4.3 | -5.4 | -4.8 | -4.7  | -5.2 | -4.3  | -4.7  | -5    | -5.2 | -4.9  | -4.6  | -4.3 | -5.1 | -4.6 | -2   | -6   | -4.9 | -5.4 | -5.2 | -4.9 | -5   | -4.9 | -5.3 | -5.1 | 0.65  |
| 1631 | -6.4 | -6.1 | -5.6  | -5.7  | -5.6 | -5.6 | -5   | -6.4 | -5.9 | -5.9  | -5.9 | -5.7  | -5.6  | -6.4  | -6.4 | -6.4  | -5.7  | -5.4 | -6.1 | -5.8 | -1.3 | -7.6 | -6.2 | -6.9 | -6.5 | -6.1 | -6.3 | -6.3 | -6.2 | -6.4 | 1.00  |
| 1632 | -6.8 | -6.3 | -5.3  | -5.6  | -6.3 | -6.2 | -5.2 | -6.2 | -5.6 | -6.1  | -6.1 | -5.7  | -5.3  | -6.7  | -6.3 | -6.1  | -5.6  | -5.7 | -6.9 | -6.3 | -1   | -6.3 | -6   | -6.9 | -6.1 | -6.6 | -6   | -6.8 | -6.8 | -6.8 | 1.06  |
| 1633 | -6.4 | -4.2 | -0.6  | 1.1   | -5.9 | -5.3 | -5.5 | -1   | -8.1 | 1.6   | 6.5  | 1.6   | -5.8  | 2.9   | 6.2  | 1.1   | -5.9  | -5.6 | 6.3  | 6    | -2   | -5.1 | -6.7 | -5   | -7.5 | -6.6 | -4.8 | -7.2 | -7   | -7.5 | 1.27  |
| 1634 | -4.4 | -0.8 | 0.4   | 6.3   | -5.6 | -4.9 | -3.9 | 2.3  | -6.2 | 17.3  | -6.3 | 4     | 4     | 7.1   | -5.3 | -6.2  | -3.8  | -5.4 | -5.9 | -5.7 | -4.4 | -3.7 | -6.1 | -4.6 | -7.7 | -6.8 | -6.3 | -7.5 | -7.3 | -6   | 5.71  |
| 1635 | -3.2 | -3.2 | -3.5  | -3.8  | -3.7 | -3.5 | -3.3 | -3.3 | -3.7 | -3.7  | -3.3 | -3.5  | -3.4  | -3.7  | -3.3 | -3.6  | -3.4  | -3.4 | -3.4 | -3.4 | -4.2 | -3.9 | -3.8 | 4    | -3.3 | -3   | -3.2 | -3.2 | -3.1 | -3.2 | 0.28  |
| 1636 | -3.4 | -3.4 | -3.4  | -3.9  | -3.3 | -3.6 | -3.5 | -3.3 | -3.6 | -3.8  | -3.3 | -3.5  | -3.4  | -3.8  | -3.2 | -3.6  | -3.4  | -3.5 | -3.5 | -3.1 | -4.2 | -3.8 | -3.6 | 4    | -3.3 | -3.2 | -3.3 | -3.3 | -3.2 | -3.3 | 0.26  |
| 1637 | -5.8 | -3.9 | -3.7  | -1.8  | -4.6 | -5   | -4.3 | -4.3 | -5.6 | 3     | -5.2 | -2.1  | 4     | -5.3  | -5   | -3.1  | -4.3  | -4.3 | -5   | -5.5 | 0.7  | -5   | -6.3 | -5.4 | -6.1 | -6.2 | -6   | -6.4 | -6.2 | -6.7 | 1.60  |
| 1638 | 3.6  | 24.9 | 12.7  | 18.1  | 8.6  | 2.4  | 13.3 | 17.9 | 4    | 30.1  | 3.5  | 39.5  | 10.5  | 23.5  | 10.2 | 23.2  | 5.4   | 6    | 2    | -1.2 | 23.3 | -3.3 | -5.9 | -5.5 | -5.5 | -4.1 | -6.3 | -4.9 | -5.9 | -4.3 | 12.45 |
| 1639 | -5.9 | -5.5 | -4.5  | -4.9  | -6.8 | -6.4 | -5.7 | -6   | 7    | -4.1  | -6.9 | -4.4  | -6.4  | -4.9  | -6.7 | -4.1  | -5.3  | -5.5 | -7   | -6.3 | 1.3  | -6.7 | -6.5 | -6.1 | -7   | -5.9 | -5.7 | -6.2 | -6   | -6.3 | 1.57  |
| 1640 | -4.3 | -4.1 | -1    | 0.9   | -3.5 | -4.6 | -2.2 | -4.4 | -4.6 | -1.2  | -4.4 | 4.2   | -3.4  | -5    | -4.4 | -3.7  | -4.2  | 4    | -5.3 | -4.9 | -1.1 | -4.3 | -7.2 | -5.4 | -5.7 | -5.5 | -5.9 | -5.5 | -5.7 | -5.9 | 2.31  |
| 1641 | -5.4 | -4.2 | -3.8  | -4.1  | -5.4 | -4.7 | -4.2 | -4.4 | -6   | -4.2  | -4.6 | -3.9  | -4.6  | -4.9  | -5.2 | -4.3  | -5.4  | -5.2 | -5.1 | -0.8 | -5.2 | -5.5 | -5.3 | -5.9 | -5.5 | -6   | -5.9 | -5.7 | -5.6 | 1.01 |       |
| 1642 | -2.1 | -1.6 | -0.7  | 0.3   | -2.3 | -1.9 | -1.4 | -1.3 | -3.5 | -1.1  | -2.8 | -0.8  | -2.8  | -1.5  | -2.8 | 0.6   | -2.5  | -1.3 | -2.8 | -2.5 | 0.6  | -3.3 | -3.6 | -2.9 | -3.3 | -3.5 | -3.7 | -3.6 | -3.3 | -3.7 | 1.29  |
| 1643 | -4.8 | -3.8 | -3.9  | -3.3  | -4.7 | -4.6 | -4.7 | -3.6 | -5.3 | -3.2  | -4.7 | -4.7  | -4.8  | -5    | -4.5 | -3.3  | -4.8  | -4.7 | -5.4 | -4.8 | 1.5  | -4.3 | -4.8 | -4.9 | -5.4 | -4.8 | -5.3 | -5   | -5   | -5.1 | 1.27  |
| 1644 | -5.2 | -4.4 | -4.8  | -4.5  | -5.3 | -5.6 | -4.3 | -4.6 | -6.7 | -4.6  | -5.3 | -4.4  | -4.2  | -5    | -5.8 | -4.2  | -4.5  | -5.3 | -5.6 | -5.2 | 0.9  | -5.5 | -5.6 | -5.6 | -5.7 | -5.8 | -6.2 | -6.5 | -6.2 | -6.4 | 1.34  |
| 1645 | -5   | -4.4 | -3.3  | -4.3  | -5.1 | -4.9 | -4.9 | -4.2 | -6.8 | -4.2  | -5.9 | -2.7  | -4.5  | -4.7  | -5.6 | 4     | -4.7  | -5.5 | -5.3 | -4.8 | 0.7  | -5.1 | -5.7 | -5.8 | -6.8 | -5.5 | -6.2 | -6.6 | -6   | -6.3 | 1.44  |
| 1646 | -6.9 | 4.9  | 3.6   | 10.4  | -2.6 | 0    | 3.1  | 3.2  | -2.9 | 3.6   | -3.9 | 14.4  | -0.3  | 3.5   | 3.9  | 9.5   | 0.5   | -2.9 | -2.3 | 9.8  | 2.3  | 0.2  | -6   | -4.8 | -5.2 | -6.5 | -6.8 | -5.8 | -6.6 | -6.3 | 5.84  |
| 1647 | -5.7 | -4.4 | -3.1  | -3.2  | -5.1 | -5.4 | -4.8 | -5   | -5.6 | -3    | -4.8 | -2    | -4.3  | -5.4  | -4.9 | -2.7  | -4.3  | -5.4 | -5.4 | -5.3 | 0.1  | -4.9 | -5.9 | -4.8 | -5.5 | -5.8 | -5.6 | -5.6 | -5.7 | -5.6 | 1.36  |
| 1648 | -5.4 | -3.6 | -3.5  | -3.5  | -5.3 | -5.1 | -4.8 | -4.6 | -5.4 | -3.4  | -5.2 | -3.4  | -4.5  | -4.9  | -4.2 | 2.8   | -4.3  | -5.4 | -6   | -5.2 | -3.4 | -4.9 | -5.4 | -4.8 | -5.6 | -5.7 | -5.7 | -5.6 | -5.5 | -5.5 | 0.89  |
| 1649 | -4.5 | -0.6 | 4     | 6.2   | -4.3 | -3.2 | 1.3  | 5.4  | -4.6 | 4.5   | -3.2 | 14.3  | -0.6  | 2.1   | -3.5 | 8.1   | -1    | 5    | -4.5 | -5.2 | 11.7 | 4    | -6   | -6.5 | -6.5 | -6.5 | -6.1 | -6.8 | -6.7 | -6.7 | 5.89  |
| 1650 | -5.3 | -4   | -4.3  | -5.4  | -5.2 | -5.7 | -4.9 | -4.5 | -5.9 | -4.9  | -5.4 | -4.8  | -4.6  | -4.8  | -4.5 | -3.8  | -4.6  | -5.4 | -5.3 | -5.1 | -3.6 | -5.5 | -5.1 | -4.8 | -5.8 | -5.3 | -5.6 | -5.6 | -5.5 | -5.7 | 0.60  |
| 1651 | -5.2 | -3.9 | -4.1  | -4.5  | -4.2 | -4   | -4.6 | -4   | -5.3 | -4.5  | -4.6 | -4.2  | -4.5  | -4.6  | -4.3 | -3.9  | -4.3  | -4.7 | -4.6 | -4.4 | -3.8 | -4.8 | -4.4 | -4.7 | -4.9 | -4.7 | -4.6 | -4.6 | -4.5 | -4.7 | 0.36  |
| 1652 | -4.6 | -2.8 | 1.8   | 1.4   | -4.8 | -4.7 | -3.6 | -1.9 | -5.9 | -1.9  | -5.3 | 2.4   | -2.9  | -2.3  | -5   | 1.3   | -3.6  | -5.1 | -5.5 | -5.5 | 0.6  | -4.2 | -5.9 | -5.7 | -5.6 | -5.9 | -7.1 | -5.7 | -6.5 | -6.6 | 2.73  |
| 1653 | -5.6 | -5.1 | -5.1  | -4.6  | -5.5 | -5.1 | -4.6 | -5   | -5.8 | -4.8  | -4.6 | -3.8  | -4.7  | -5.2  | -4.1 | -4.7  | -4.4  | -4.9 | -5.5 | -4.9 | -2.8 | -4.9 | -5.7 | -5.6 | -5.7 | -5.8 | -5.8 | -5.9 | -5.8 | -6.2 | 0.72  |
| 1654 | -5.8 | -5.6 | -5.3  | -5.2  | -5.6 | -5.4 | -4.6 | -6.1 | -6.1 | -5    | -5.2 | -5    | -4.7  | -5.7  | -5.2 | -5.1  | -5    | -5.4 | -5.7 | -5.9 | -2.7 | -6.6 | -6.5 | -6.4 | -6   | -6.2 | -5.9 | -6.1 | -6   | -6.1 | 1.61  |
| 1655 | -4.8 | -4.8 | -4.5  | -4.4  | -4.7 | -4.6 | -4.2 | -4.5 | -5.2 | -4.6  | -4.7 | -4.7  | -4.6  | -5    | -4.8 | -4.5  | -4.5  | -4.9 | -4.7 | -5   | -1.2 | -5.3 | -5   | -5.2 | -5.1 | -4.8 | -4.9 | -4.7 | -4.7 | -4.8 | 0.70  |
| 1656 | -4.5 | -4.1 | -4.1  | -4.5  | -3.8 | -4.1 | -4.3 | -4.1 | -4.9 | -4.1  | -4.7 | -4.3  | -3.8  | -3.8  | -4.5 | -3.4  | -4    | -4.3 | -4.5 | -4.1 | -3.9 | -4.5 | -3.8 | -4.8 | -4.2 | -4.1 | -3.9 | -3.9 | -3.9 | -4.1 | 0.34  |
| 1657 | 54.9 | 77.9 | 119.6 | 131.9 | 99.1 | 76.8 | 98.9 | 93.1 | 67.9 | 114.9 | 95.5 | 145.7 | 116.9 | 103.9 | 95.1 | 112.7 | 105.1 | 68.2 | 68   | 90.9 | 37.7 | 41.6 | 7    | 38   | 3.8  | 15.9 | 13.3 | 6.5  | 5.9  | 15.5 | 42.82 |
| 1658 | -6   | -6.3 | -5.9  | -5.6  | -6.1 | -5.6 | -5.8 | -6.4 | -6.1 | -5.8  | -5.9 | -6    | -5.5  | -6.2  | -6.6 | -5.9  | -6    | -6   | -5.7 | -2.6 | -6.2 | -6.2 | -6.2 | -6.5 | -6.3 | -6.3 | -6.2 | -6   | -6.2 | -6   | 0.68  |
| 1659 | -5.3 | -4.6 | -5    | -4.5  | -5.2 | -6.1 | -4.6 | -4.8 | -5.8 | -4.4  | -5   | -5.3  | -5    | -5.2  | -4.9 | -4.2  | -4.4  | -5.3 | -5.3 | -4.9 | 4    | -5.8 | -5.3 | -5.8 | -5.8 | -5.2 | -5.1 | -5.9 | -5.5 | -5.7 | 0.54  |
| 1660 | -5.3 | -4.4 | -4.5  | -4.7  | -5.5 | -5.4 | -5.1 | -3.9 | -5.7 | -4.5  | -5.6 | -4.6  | -4.9  | -4.5  | -5.1 | -3.1  | -4.7  | -5.4 | -5.8 | -5.3 | -4.1 | -4.4 | -5.4 | -4.9 | -5.7 | -5.4 | -5.4 | -5.4 | -5.3 | -5.4 | 0.62  |
| 1661 | -5.1 | -4.7 | -4.5  | -4.8  | -4.8 | -4.9 | -4.3 | -4.9 | -5   | -5.1  | -4.8 | -4.8  | -4.6  | -5.3  | -5.1 | -4.6  | -4.4  | -5.1 | -5.6 | -5   | -3   | -5.3 | -5.5 | -5   | -5.2 | -5.1 | -5   | -5.2 | -5.2 | -5.1 | 0.47  |
| 1662 | -5.2 | -5.1 | -4.4  | -4.8  | -4.8 | -4.9 | -4.2 | -4.7 | -4.7 | -5.5  | -4.8 | -4.5  | -4.6  | -5.6  | -5.2 | -4.5  | -4.3  | -5   | -5.4 | -5.1 | -3.4 | -5.3 | -5.6 | -4.9 | -5.3 | -5.1 | -5.1 | -5.2 | -5.1 | -5.2 | 0.47  |
| 1663 | -5.1 | -5.1 | -4.4  | -4.6  | -4.7 | -4.7 | -4.2 | -4.9 | -4.7 | -5.5  | -4.8 | -4.7  | -4.4  | -5.5  | -4.5 | -4.8  | -5    | -5   | -5.3 | -5   | -3.5 | -5.5 | -5.7 | -4.9 | -5.1 | -4.9 | -5.1 | -5.1 | -5   | -5.1 | 0.44  |
| 1664 | -5   | -4.5 | -4.5  | -4.7  | -4.8 | -4.8 | -4.2 | -4.8 | -5.2 | -5.2  | -4.5 | -4.7  | -4.4  | -5.1  | -4.8 | -4.5  | -4.3  | -4.7 | -5.6 | -5   | -3.2 | -5.4 | -5.4 | -5   | -5.3 | -5.1 | -5.2 | -5.2 | -4.9 | -4.9 | 0.46  |
| 1665 | -4.3 | -3.7 | -4.8  | -4.1  | -4.5 | -5.1 | -4.2 | -4.1 | -5.3 | -4.2  | -4.5 | -4.3  | -4.8  | -4.4  | -4.3 | -4.2  | -4.2  | -4.7 | -4.5 | -4.7 | -4.4 | -5.1 | -4.6 | -5   | -5.2 | -4.9 | -4.8 | -5.2 | -5   | -5.1 | 0.41  |
| 1666 | -6.1 | -3.2 | -2.3  | -1.5  | -6.5 | -5.8 | -4.5 | -0.5 | -7   | -4.2  | -6.2 | -0.4  | -4.1  | -4.5  | -5.9 | 2.4   | -5.5  | -5.3 | -6.9 | -5.9 | -4.8 | -3.1 | -5.9 | -4.2 | -7.4 | -6.4 | -6.9 | -6.7 | -7   | -7   | 0.37  |
| 1667 | -4.7 | -4.8 | -4.4  | -4.4  | -5   | -4   | -3.8 | -5.1 | -5.1 | -4.4  | -5.5 | -4.1  | -4.3  | -5.1  | -4.9 | -4.3  | -4.4  | -4.7 | -5.4 | 5    | -3.4 | -5.5 | -5.5 | -5   | -5.3 | -5.1 | -5.5 | -5.5 | -5.4 | -5.3 | 0.50  |
| 1668 | -5.5 | -5.5 | -4.5  | -4.4  | -4.9 | -4.8 | -5.1 | -5.5 | -6.4 | -4    | -6   | -4.7  | -4.6  | -5.1  | -5.4 | -5.4  | -5.3  | -5   | -5.1 | -4.9 | -0.4 | -6.2 | -6.5 | -6.2 | -5.7 | -5.7 | -5.6 | -5.9 | -5.6 | -6   | 1.09  |
| 1669 | -5.5 | -4.7 | -4.8  | -4.5  | -5.3 | -5   | -4.9 | -4.5 | -6.4 | -4.4  | -5.2 | -5.2  | -5.1  | -5.2  | -5.2 | -4.4  | -4.6  | -5.5 | -5.6 | -5.3 | -3.4 | -5.3 | -5.2 | -5.7 | -6.7 | -5.8 | -5.9 | -6.4 | -5.8 | -6.3 | 0.71  |
|      |      |      |       |       |      |      |      |      |      |       |      |       |       |       |      |       |       |      |      |      |      |      |      |      |      |      |      |      |      |      |       |

|      |      |      |      |      |      |      |      |      |      |      |      |      |      |      |      |      |      |      |      |      |      |       |      |       |      |      |      |      |      |      |       |      |
|------|------|------|------|------|------|------|------|------|------|------|------|------|------|------|------|------|------|------|------|------|------|-------|------|-------|------|------|------|------|------|------|-------|------|
| 1711 | -6   | -4.5 | -1.9 | -3.4 | -6.1 | -6   | -5.6 | -0.1 | -6.4 | 5.5  | -5.9 | 1.5  | -5.1 | 1.3  | -5.8 | 0.2  | -4.7 | -6.5 | -6.6 | -6   | 1.4  | -3.6  | -6.1 | -4.7  | -6.3 | -6   | -6.2 | -6.3 | -6.1 | -6.3 | 3.19  |      |
| 1712 | -6   | -1.5 | -1.9 | -1   | -6   | -5.4 | -5.2 | 3.3  | -6.8 | 1.2  | -5.7 | 3.9  | -4.9 | 0.9  | -5.3 | 1.5  | -4.3 | -5.7 | -6.8 | -5.8 | 8.3  | -2.5  | -5.3 | -4.6  | -6.7 | -6.3 | -6.4 | -6.4 | -6.3 | -6.4 | 3.88  |      |
| 1713 | -5.4 | -4   | -1.7 | -3.6 | -5   | -4.2 | -3.3 | -2.6 | -6.4 | -1.8 | -5.2 | -3.3 | -5.1 | -2.5 | -4.4 | -2.4 | -3.7 | -4.5 | -4.7 | -4.6 | 0.2  | -4.4  | -6.2 | -5.1  | -5.6 | -5.5 | -5.4 | -5.8 | -5.9 | 1.50 |       |      |
| 1714 | -5.6 | -4.5 | -4.2 | -3.3 | -4.2 | -4.5 | -3.3 | -4.3 | -5.7 | -3.1 | -5.3 | -3.7 | -4   | -4.6 | -4.2 | -3.5 | -3.8 | -4.8 | -5.1 | -4.6 | 0    | -5    | -6.4 | -5.2  | -5.9 | -5.7 | -6.4 | -6.3 | -6.2 | -6.2 | 1.33  |      |
| 1715 | -5.4 | -4   | -3.1 | -1.8 | -4.8 | -5   | -3.8 | -4.3 | -6.6 | -3.1 | -4.9 | -1.8 | -3.8 | -4.5 | -4.8 | -3.9 | -3.3 | -4.3 | -4.7 | -4.5 | -2   | -5.3  | -6   | -5.1  | -6.1 | -5.6 | -6.8 | -6.5 | -6.3 | -6.4 | 1.40  |      |
| 1716 | -6   | -3   | 1.6  | -0.2 | -5.9 | -5.6 | -4.8 | 0.7  | -6.7 | 0    | -5.8 | 9.9  | -5.1 | -0.4 | -5.2 | 3.7  | -5   | -5.1 | -6.1 | -5   | 3.9  | -6.2  | -7.2 | -6.4  | -6.3 | -6.2 | -6.2 | -6.2 | -6.1 | -6.3 | 4.11  |      |
| 1717 | -5   | -4.4 | -4.7 | -5.1 | -4.6 | -5.2 | -4.6 | -4.4 | -5   | -4.6 | -4.5 | -4.2 | -4.4 | -4.8 | -4.6 | -4.5 | -4   | -4.7 | -4.3 | -4.2 | -4   | -5.1  | -4.6 | -5    | -4.8 | -5   | -4.7 | -5.2 | -5.1 | -4.8 | 0.34  |      |
| 1718 | -5   | -4.5 | -5   | -4.6 | -4.8 | -4.5 | -4.7 | -5.2 | -4.8 | -4.7 | -4.9 | -4.3 | -4.6 | -5.5 | -5   | -4.7 | -4.8 | -4.8 | -4.7 | -4.9 | -0.5 | -5.8  | -4.9 | -5.2  | -5.5 | -5.1 | -5.2 | -5.3 | -5   | -5.2 | 0.87  |      |
| 1719 | -5   | -4.7 | -1.7 | -0.9 | -5   | -4.8 | -4.2 | -2.4 | -6.4 | -2.6 | -5.3 | 1.9  | -4.8 | -4.1 | -5.4 | -2.2 | -4.6 | -4.8 | -4.8 | -6   | -5.9 | -3.7  | -4.6 | -6.2  | -5.8 | -5.8 | -6.5 | -5.8 | -6.7 | -6   | -6.2  | 1.93 |
| 1720 | -0.4 | -1.8 | 5.1  | 5.7  | -1.9 | -1.2 | 1.4  | -0.9 | -4.4 | 7.9  | 0.5  | 6.4  | 1.5  | 5.6  | 0.8  | 4.6  | -1.6 | -1.3 | -4.1 | 0.2  | 6.6  | -1.8  | -4.6 | -2.7  | -5.6 | -4.6 | -6.1 | -5.3 | -4.4 | -4.1 | 4.13  |      |
| 1721 | -4.7 | -3   | -0.5 | 3.1  | -5.8 | -6   | -3.9 | -0.6 | -6   | 2.7  | -5.9 | 8.2  | -5   | 1.2  | -6.1 | 5.9  | -6.2 | -5.7 | -5.9 | -6.4 | 3.9  | -3.7  | -6.8 | -4.5  | -6.6 | -7.6 | -6.5 | -3.5 | -7.3 | -6.8 | 4.33  |      |
| 1722 | -2.2 | -2   | 1.7  | 1.7  | -2.1 | -1.2 | 0.8  | -3.4 | -2.7 | -2   | 6.6  | -1.1 | -2   | -2.3 | 0.8  | -2.7 | -2.1 | -2.8 | -0.2 | 5.3  | -2.5 | -4.6  | -3.6 | -3.9  | -4.1 | -4.4 | -4.9 | -4   | -4.1 | 2.80 |       |      |
| 1723 | -5.6 | -3.9 | -3.7 | -2.9 | -5.2 | -4.8 | -4.7 | -4.2 | -6.1 | -3.1 | -4.9 | -4.2 | -5.3 | -4.7 | -5.3 | -4.4 | -5.1 | -4.9 | -5   | -4.9 | -3.4 | -5.7  | -6.3 | -5.4  | -5.9 | -5.7 | -5.5 | -5.8 | -5.7 | -5.8 | 0.88  |      |
| 1724 | -6.4 | -5.7 | -5.5 | -4.6 | -5.6 | -5.7 | -5.2 | -5.6 | -6.8 | -4.3 | -5.6 | -5.4 | -5.3 | -6.1 | -5.9 | -4.9 | -5.3 | -5.4 | -6.2 | -5.6 | -5.1 | -6.1  | -6.5 | -6    | -6.6 | -6.1 | -6.4 | -6.2 | -6.3 | -6.5 | 0.61  |      |
| 1725 | -6.7 | -5.5 | -3.9 | -4.8 | -6.3 | -6.4 | -4.5 | -6.1 | -6.7 | -5.1 | -6.3 | -3   | -5.3 | -5.1 | -6.3 | -4.7 | -5.3 | -6.5 | -6.3 | -6.1 | -2.5 | -6.9  | -6.8 | -6    | -6.9 | -6.2 | -6.7 | -6.4 | -6.4 | -6.6 | 1.13  |      |
| 1726 | 52.3 | 53.5 | 65.3 | 72.1 | 71.2 | 56   | 57.3 | 66.4 | 57.5 | 64.2 | 70.7 | 73.6 | 75.7 | 65.6 | 67.3 | 55.4 | 66.7 | 57.5 | 55.6 | 61.2 | 97.3 | 122.1 | 37.9 | 101.9 | 37.3 | 34.5 | 49.8 | 33.3 | 33.2 | 33.7 | 20.36 |      |
| 1727 | -3.9 | -3.8 | -3.4 | -3.1 | -3.5 | -3.4 | -3   | -3.5 | -4.5 | -3.3 | -3.5 | -3.2 | -4.2 | -3.9 | -3.6 | -3.2 | -2.8 | -3.7 | -3.7 | -3.6 | -3.4 | -4.5  | -4.4 | -4    | -4.6 | -4.2 | -4.3 | -4.4 | -4.5 | -4.4 | 0.52  |      |
| 1728 | 45.1 | 48.3 | 41.5 | 76.3 | 69.1 | 63.6 | 55   | 52.6 | 48.2 | 74.1 | 41.7 | 82.8 | 64.4 | 55.2 | 47.5 | 50.1 | 52.1 | 60.9 | 63.5 | 58.5 | 88   | 60.2  | 6.8  | 11.9  | 0.2  | 21.4 | 1.3  | -0.2 | 25.5 | -1.9 | 25.90 |      |
| 1729 | 11.6 | 28.5 | 18.8 | 40.7 | 21.6 | 12.3 | 21.4 | 14.9 | 6.3  | 41.2 | 9.9  | 54.1 | 10.7 | 31.8 | 15.5 | 32.5 | 11.7 | 10.1 | 6.7  | 21.6 | 42.1 | 21.3  | -3.6 | 4.2   | -4.8 | -5.5 | -5.9 | -5.4 | -5.5 | -5.1 | 16.36 |      |
| 1730 | -6   | -3.6 | 4.1  | 2.5  | -4.1 | -4.1 | -0.5 | 7.2  | -4.5 | 14.5 | -5   | 14.8 | -3.7 | 7.4  | -4.2 | 7    | -0.8 | -3   | -5.5 | -4.3 | -2.8 | 4.6   | -6.2 | -3.1  | -6.5 | -6.6 | -6   | -6.7 | -6.3 | -6.6 | 6.17  |      |
| 1731 | -5.7 | -4.9 | -5   | -4.8 | -5.9 | -5.8 | -5.1 | -5.2 | -5.7 | -5   | -5.8 | -5   | -5   | -5.5 | -5.4 | -4.7 | -4.9 | -5.9 | -5.9 | -5.4 | -4.8 | -6.2  | -6.4 | -5.2  | -5.8 | -5.5 | -5.8 | -5.6 | -5.7 | -5.8 | 0.45  |      |
| 1732 | -6.2 | -5   | -5.2 | -1.8 | -6.5 | -6   | -4.1 | -5   | -7.9 | -4.9 | -5.2 | -2.4 | -4.8 | -4.5 | -5.8 | -5.2 | -5.3 | -5.5 | -5.8 | -5.1 | -3.5 | -6.2  | -7.2 | -6.8  | -7.9 | -7   | -7.1 | -7.6 | -7.7 | -8.1 | 1.55  |      |
| 1733 | -5.7 | -1.7 | -0.3 | -0.7 | -4.6 | -4   | -3.7 | -3.6 | -6.1 | 1.8  | -4.6 | -1.3 | -3.7 | -4.3 | -4.3 | 0.9  | -3.4 | -4.6 | -4.4 | -5   | 5.4  | -4.4  | -6.7 | -4.8  | -5.3 | -5.4 | -6.5 | -5.5 | -6.8 | -6.7 | 2.79  |      |
| 1734 | -5.4 | -5.3 | -5.1 | -4.7 | -5.3 | -4.8 | -4.3 | -5.8 | -5.4 | -4.7 | -4.7 | -4.5 | -4.7 | -5.3 | -5.1 | -5   | -4.6 | -5.1 | -5.2 | -4.8 | -4.6 | -5.8  | -5.2 | -5.5  | -4.9 | -5.3 | -5   | -5.2 | -5.5 | -5.1 | 0.37  |      |
| 1735 | 0.8  | 5.2  | 6.3  | 7.2  | -3.4 | -0.7 | 0.2  | 13.6 | -4.4 | 13.8 | -4.3 | 26.3 | 0.9  | 4.4  | 7.5  | 7.2  | -0.2 | -3.8 | -4.5 | -1.6 | 3.9  | 1.5   | -6.3 | -2.3  | -6.3 | -6   | -6   | -6.7 | -5.7 | -6.8 | 7.59  |      |
| 1736 | -5.2 | -5.1 | -5.2 | -4.5 | -5.9 | -5.3 | -4.6 | -5.7 | -6.1 | -4.7 | -5.9 | -5   | -5.5 | -5.3 | -5.2 | -4.7 | -4.4 | -4.7 | -5.6 | -4.8 | -3   | -6    | -5.8 | -5.9  | -5.5 | -5.8 | -5.3 | -6.1 | -5.2 | -5.6 | 0.65  |      |
| 1737 | -0.5 | 3.2  | 13.1 | 19.9 | -0.4 | -0.2 | 2.2  | 2.5  | -1.3 | 10.1 | 3.4  | 9.3  | 1.4  | 18.4 | 8    | 18.1 | 0.2  | 2.5  | -2   | -0.3 | 15.4 | -3.8  | -5.5 | -3.1  | -6.4 | -6.5 | -6.6 | -5.4 | -6.8 | -6.6 | 8.09  |      |
| 1738 | -4.6 | -4   | -4.7 | -5.2 | -4.5 | -5.1 | -4.8 | -4.5 | -5.1 | -4.3 | -4.9 | -4.5 | -4.7 | -5.1 | -4.4 | -4.1 | -4.3 | -4.2 | -4.2 | -4.4 | -3.7 | -4.7  | -4.7 | -4.9  | -4.8 | -4.7 | -4.7 | -4.9 | -4.6 | -4.6 | 0.35  |      |
| 1739 | -6.6 | 5.1  | -5.1 | -3.9 | -5.5 | -5.4 | -5.6 | -5.1 | -5.7 | -3.7 | -5.3 | -3.3 | -4.7 | -5.6 | -5.7 | -4.2 | -5.3 | -5.4 | -5.7 | -5.2 | -3.5 | -4.7  | -6   | -6.1  | -5.7 | -5.8 | -5.6 | -5.6 | -5.4 | -5.4 | 0.78  |      |
| 1740 | -6.1 | -2.8 | 0.9  | 2.2  | -6.6 | -6   | -4.8 | 0.2  | -5.7 | 2.9  | -6.1 | 3.7  | -4.9 | 1.8  | -6   | -0.1 | -5.7 | -5.8 | -6.4 | -5   | -0.9 | -3.2  | -7.5 | -5.2  | -6.4 | -7.1 | -6.4 | -6.6 | -7.2 | -6.4 | 3.45  |      |
| 1741 | -5.2 | -3.9 | -2.1 | -1.8 | -5.6 | -5.5 | -4.5 | -3.9 | -6.8 | -3.1 | -5.9 | -2.1 | -5.2 | -3.7 | -5.2 | -2.2 | -4.6 | -5.4 | -6.3 | -5.8 | -2.8 | -5.2  | -7.1 | -5.1  | -6   | -5.8 | -6.3 | -6.6 | -6   | -6.3 | 1.53  |      |
| 1742 | -5.7 | -6.3 | -5   | -5.2 | -5.6 | -5.3 | -4.8 | -6.2 | -5.8 | -4.9 | -6   | -5.5 | -5   | -5.6 | -5.3 | -6.1 | -5   | -5.7 | -5.6 | -5.6 | -3.5 | -7    | -6.1 | -6.2  | -5.8 | -6.3 | -5.8 | -6.3 | -5.9 | -6   | 0.65  |      |
| 1743 | -5.8 | -5.9 | -5.2 | -5.1 | -6.2 | -5.6 | -4.8 | -5.9 | -5.6 | -5.6 | -6.1 | -5.1 | -4.6 | -6   | -6   | -5.6 | -5.1 | -5.5 | -5.9 | -5.6 | -4.7 | -6.4  | -6.3 | -6.6  | -6.1 | -6   | -6   | -5.9 | -5.8 | -5.9 | 0.50  |      |
| 1744 | -5.6 | -5.8 | -5.1 | -5.2 | -5.6 | -5.3 | -5   | -6.3 | -5.5 | -5   | -5.7 | -5.5 | -4.9 | -5.5 | -5.4 | -6.1 | -5   | -5.6 | -5.9 | -5.5 | -1.4 | -6.9  | -6.1 | -6.1  | -5.6 | -6.3 | -5.6 | -6.2 | -5.8 | -5.9 | 0.90  |      |
| 1745 | -6.1 | -6.3 | -5.4 | -5.3 | -5.8 | -5.5 | -5.1 | -6.6 | -5.7 | -5.6 | -5.5 | -5.4 | -5.7 | -5.9 | -5.9 | -5.3 | -5.1 | -5.7 | -6   | -5.9 | -3   | -6.9  | -6.1 | -7.3  | -5.9 | -5.9 | -6.1 | -6   | -6.1 | -6.1 | 0.71  |      |
| 1746 | -6.4 | -5.7 | -6   | -6.1 | -5.8 | -5.6 | -5.4 | -6.3 | -5.9 | -6.1 | -6.1 | -5.7 | -5.6 | -6.5 | -6.2 | -5.7 | -6.3 | -6.1 | -6.5 | -6.3 | -2.6 | -6.9  | -6.4 | -6.8  | -6.3 | -6.3 | -6.6 | -6.2 | -6.2 | -6.3 | 0.74  |      |
| 1747 | -4.2 | -3.1 | -2.9 | -2.7 | -4.5 | -4.5 | -3   | -4.6 | -4.7 | -3.7 | -5.3 | -2.3 | -3.6 | -4.4 | -4.4 | -2.8 | -3.8 | -4.8 | -4.8 | -4.6 | -2.6 | -5.7  | -6.5 | -5.2  | -5.3 | -5.6 | -5   | -5.4 | -4.9 | -4.8 | 1.62  |      |
| 1748 | -4.5 | -4.2 | -4.5 | -4.4 | -4.2 | -4.7 | -4.4 | -4.7 | -4.7 | -4.5 | -4.1 | -4.8 | -4.3 | -4.6 | -4.3 | -4.1 | -4.2 | -4.1 | -4.2 | -4.2 | -4   | -4.7  | -4.8 | -4.9  | -4.5 | -4.2 | -4.4 | -4.4 | -4.3 | -4.5 | 0.24  |      |
| 1749 | -4.6 | -4.4 | -4.4 | -4.6 | -4.3 | -4.8 | -4.3 | -4.6 | -5.2 | -4.4 | -4.7 | -4.4 | -4.5 | -4.4 | -4.3 | -4.3 | -4.1 | -4.2 | -4.7 | -4.4 | -4   | -4.8  | -3.9 | -5.1  | -4.9 | -4.5 | -4.7 | -4.5 | -4.6 | -4.7 | 0.29  |      |
| 1750 | -5.3 | -4.8 | -4.7 | -4.4 | -5.5 | -5.1 | -5.2 | -5   | -5.3 | -4.7 | -4.8 | -4.9 | -5.2 | -5.6 | -5.2 | -4.7 | -4.6 | -5.3 | -5.2 | -5.1 | -3.3 | -5    | -4.9 | -5.4  | -5.4 | -5.1 | -5.4 | -5.2 | -5.3 | -5.2 | 0.43  |      |
| 1751 | -6.1 | -4.5 | -4.4 | -4.2 | -5.8 | -5.3 | -4.5 | -3.8 | -7   | -4   | -5.8 | -4.7 | -4.1 | -5.4 | -5.8 | -4.8 | -4.5 | -5.2 | -6.2 | -4.8 | -4.6 | -5.9  | -6.2 | -5.5  | -6.3 | -6.1 | -6   | -6.2 | -6   | -6.4 | 0.86  |      |
| 1752 | -6   | -4.3 | -4.3 | -3.7 | -5.7 | -4.8 | -5.2 | -4.3 | -6.7 | -4.2 | -5.9 | -5   | -6.1 | -5.3 | -5.9 | -4.7 | -4.6 | -5.1 | -5.4 | -4.9 | -2.3 | -5.9  | -5.7 | -5.1  | -6   | -5.9 | -6   | -6.1 | -6   | -6.3 | 0.93  |      |
| 1753 | -5.3 | -4.6 | -5.3 | -4.1 | -5.2 | -4.7 | -4.8 | -4.3 | -6.3 | -4.5 | -4.9 | -3.8 | -4.4 | -4.8 | -4.5 | -3.9 | -4.5 | -4.3 | -5.7 | -5.5 | -1.9 | -5.3  | -5   | -5.1  | -6.6 | -5.9 | -6.1 | -6.3 | -5.8 | -6.3 | 0.96  |      |
| 1754 | -4.7 | -4.2 | -4.9 | -4.6 | -4.8 | -4.4 | -4.2 | -4.4 | -4.6 | -5   | -5   | -4.7 | -4.4 | -5.1 | -4.6 | -4.4 | -4.7 | -4.6 | -4.5 | -4.4 | -2.7 | -4.8  | -4.7 | -4.7  | -4.9 | -4.5 | -4.9 | -4.8 | -4.6 | -4.8 | 0.42  |      |
| 1755 | -3.5 | -3.4 | -3.7 | -3.2 | -3.5 | -3.3 | -3   | -3.6 | -3.2 | -3.3 | -3.5 | -3.4 | -3.1 | -3.6 | -3.4 | -3.5 | -3.6 | -3.1 | -3.5 | -3   | -4.4 | -4    | -3.4 | -3.6  | -3.5 | -3.5 | -3.6 | -3.5 | -3.6 | -3.5 | 0.28  |      |
| 1756 | -5.7 | -5.4 | -5.2 | -5.4 | -5.2 | -5.1 | -5   | -5.9 | -5.1 | -5.7 | -5.5 | -5.1 | -5.1 | -5.7 | -5.5 | -5.2 | -5.4 | -4.9 | -5.5 | -5.1 | -4.5 | -6.8  | -5.3 | -5.7  | -6   | -5.4 | -5.9 | -5.6 | -5.6 | -5.8 | 0.42  |      |
| 1757 | -5.4 | -5.2 | -5.3 | -5.4 | -5.2 | -4.9 | -5.2 | -5.8 | -5.1 | -5.4 | -5.1 | -5.4 | -5   | -5.6 | -5.6 | -5.4 | -5.3 | -5   | -5.2 | -4.7 | -4.7 | -6.3  | -5.6 | -5.8  | -5.7 | -5.1 | -5.4 | -5.4 | -5.2 | -5.5 | 0.33  |      |
| 1758 | -4.8 | -4.7 | -4.7 | -4.8 | -4.6 | -5.5 | -4.1 | -5.2 | -4.7 | -4.7 | -4.7 | -4.4 | -4.4 | -4.9 | -4.8 | -4.9 | -4.7 | -4.6 | -4.7 | -4.3 | -4.5 | -5.8  | -4.8 | -5    | -5.1 | -4   |      |      |      |      |       |      |

| Binding Energy (Kcal/mol) |         | NMR conformations |         |         |         |         |         |         |         |         |         |         |         |         |         |         |         |         | MD conformations |         |            |            |            |            |          | NMA conformations |           |            |           |            | Standard deviation |
|---------------------------|---------|-------------------|---------|---------|---------|---------|---------|---------|---------|---------|---------|---------|---------|---------|---------|---------|---------|---------|------------------|---------|------------|------------|------------|------------|----------|-------------------|-----------|------------|-----------|------------|--------------------|
| ZINC ID                   | conf_01 | conf_02           | conf_03 | conf_04 | conf_05 | conf_06 | conf_07 | conf_08 | conf_09 | conf_10 | conf_11 | conf_12 | conf_13 | conf_14 | conf_15 | conf_16 | conf_17 | conf_18 | conf_19          | conf_20 | conf_01500 | conf_02500 | conf_03750 | conf_04250 | conf_091 | conf_0911         | conf_0101 | conf_01011 | cnof_0111 | conf_01111 |                    |
| ZINC00001114              | -7.1    | -5.9              | -2.4    | -3      | -6      | -6.2    | -6.5    | -1.7    | -7.9    | -1.8    | -7.1    | 0.1     | -6.9    | 0.5     | -6.2    | -1.2    | -6.6    | -6.4    | -6.8             | -6.7    | -4         | -4.4       | -7.5       | -4.1       | -7.6     | -6.2              | -6.4      | -6.4       | -6.3      | -6.4       | 2.38               |
| ZINC00027907              | -7.5    | -4.4              | -3.5    | -3.4    | -6.4    | -6.1    | -4.8    | -4.3    | -6.2    | -3.6    | -5.9    | -2.2    | -4.8    | -4.5    | -6      | -1.7    | -4.9    | -5.6    | -6.3             | -6.2    | -4.5       | -4.7       | -6.3       | -5.3       | -7       | -6.9              | -7.3      | -7.4       | -7.2      | -7.5       | 1.55               |
| ZINC00061975              | -7.7    | -4.8              | -5.5    | -3.9    | -7.1    | -6.9    | -5.9    | -4.1    | -8.2    | -4.7    | -7.1    | -4.5    | -5.7    | -5.7    | -6.2    | -3      | -6.3    | -6.7    | -6.9             | -6.7    | -3.2       | -6.3       | -6.4       | -6.2       | -7.9     | -6.7              | -7.9      | -7.5       | -7.4      | -7.9       | 1.42               |
| ZINC00119484              | -7.7    | -6.5              | -6.6    | -6.2    | -6.4    | -6      | -5.9    | -7.1    | -6.4    | -6.1    | -6.2    | -6.5    | -6.1    | -6.7    | -6.7    | -6.4    | -6.3    | -6.2    | -6.9             | -6.3    | -7.2       | -5.6       | -6.9       | -7.2       | -6.8     | -7.4              | -6.5      | -7.4       | -7.8      | -7.5       | 2.58               |
| ZINC00134139              | -7.6    | -6.9              | -6.4    | -6.5    | -7.2    | -7      | -7.4    | -7.5    | -7      | -6      | -6.8    | -5.5    | -5.8    | -7.4    | -7.3    | -6.3    | -6.9    | -7.1    | -7.1             | -7      | -4.8       | -5.6       | -7         | -6.6       | -7.5     | -7.3              | -7.5      | -7.6       | -7.5      | 0.71       |                    |
| ZINC00155744              | -7.6    | -5.9              | -4      | -3.8    | -7.3    | -6.6    | -6.9    | -2.1    | -9.1    | -2      | -7.1    | -3.7    | -6.5    | -1.2    | -7.1    | -2.7    | -6.3    | -6.4    | -7.7             | -6.8    | -4.6       | -4.3       | -6.6       | -5.5       | -8.1     | -7.2              | -7.6      | -7.7       | -7.7      | -7.8       | 2.06               |
| ZINC00155747              | -7.5    | -5.2              | -4.1    | -4      | -7.9    | -6.4    | -7.1    | -3      | -9.4    | -2.8    | -7.4    | -3.4    | -6.9    | -2.8    | -7.4    | -2.6    | -6.5    | -6.7    | -7.9             | -7.1    | -4.5       | -4.1       | -6.8       | -5         | -8.2     | -7.5              | -7.7      | -7.9       | -7.9      | -8         | 1.98               |
| ZINC00203122              | -7.8    | -5.3              | 0.6     | 0.2     | -6.7    | -6.4    | -5.8    | -1.3    | -8.4    | -1.8    | -6.9    | 1.1     | -5.5    | 0       | -6.4    | -0.4    | -6.9    | -6.1    | -6.8             | -6.3    | -2.3       | -5.6       | -6.6       | -5.5       | -8.3     | -7.3              | -7        | -7.8       | -6.9      | -8.1       | 2.98               |
| ZINC00273923              | -7.6    | -5.5              | -2.8    | -1.6    | -7.1    | -6.8    | -5.8    | -2.3    | -7.3    | -2.7    | -6.4    | -3.8    | -5.9    | -3.9    | -6.9    | -1.3    | -5.9    | -6.2    | -7.3             | -6.9    | -4.1       | -6.6       | -6.5       | -5.7       | -7.4     | -7.1              | -7.6      | -7.6       | -7.6      | -7.4       | 1.95               |
| ZINC00286135              | -7.5    | -3.7              | -2.8    | -2.2    | -7.1    | -7.2    | -5.4    | -2.9    | -6.9    | 0.5     | -6.5    | 3.4     | -4.7    | -2.4    | -6      | -0.3    | -4.7    | -6.4    | -7               | -6.4    | -4.5       | -5         | -6.7       | -5.7       | -7       | -7.3              | -7.3      | -7.3       | -7.6      | -7.5       | 2.73               |
| ZINC00291200              | -7.5    | -6.6              | -2.8    | -5      | -7.5    | -6.8    | -7.3    | -2      | -8.4    | -1.5    | -7.8    | -1.2    | -7.8    | -1      | -8      | -2      | -6.8    | -6.8    | -7.6             | -7.1    | -3.7       | -3.4       | -6.3       | -4.8       | -7.6     | -6.5              | -6.8      | -7.7       | -7.3      | -7.9       | 2.38               |
| ZINC00308352_1            | -7.4    | -5.6              | -2.8    | -4.6    | -6.8    | -6.6    | -5.5    | -1      | -6.6    | -2.9    | -6      | 0.9     | -5.9    | -3.6    | -6.4    | -1.3    | -5.5    | -6.7    | -7.1             | -6.3    | -3.2       | -6.9       | -6.4       | -6.3       | -7.9     | -7.2              | -7.5      | -7.4       | -7.4      | -7.8       | 2.23               |
| ZINC00411819              | -7.4    | -4.2              | -4.9    | -4.1    | -7.2    | -6.9    | -6.3    | -4.6    | -7.6    | -4.6    | -7.1    | -3.6    | -6.9    | -5.1    | -7      | -3.2    | -6.4    | -6.1    | -7.4             | -6.6    | -4.4       | -6.9       | -6         | -6.5       | -7.3     | -7.1              | -6.6      | -7.5       | -7.5      | -7.8       | 1.35               |
| ZINC00412330_2            | -7.7    | -6                | -3.7    | -2.6    | -6.6    | -6.2    | -6.8    | -1.2    | -7.7    | -2.9    | -7.5    | 4.4     | -6.9    | -0.3    | -7      | -1.2    | -6.7    | -6.4    | -7.4             | -5.9    | -5.1       | -6.5       | -6.5       | -5         | -7.4     | -6.9              | -6.9      | -7.5       | -7.7      | -7.7       | 2.83               |
| ZINC00443777              | -7.6    | -5.5              | -4.3    | -4.7    | -6.2    | -6.8    | -5.7    | -5.3    | -6.1    | -4.4    | -6.3    | -3      | -5.6    | -5.9    | -6.4    | -3.5    | -5      | -6.4    | -7.4             | -5.5    | -0.2       | -5.4       | -6.8       | -6.2       | -7.9     | -7.1              | -7.6      | -6.5       | -7.4      | -7.6       | 1.62               |
| ZINC00470650              | -7.3    | -4.5              | -3.3    | -3.4    | -6.8    | -6.5    | -7      | -3.2    | -7.4    | -5      | -7.4    | -4.1    | -6.5    | -2.9    | -6.8    | -1.5    | -4.8    | -6.6    | -7.1             | -6.9    | -4.7       | -6.3       | -6.2       | -5.4       | -7.5     | -6.8              | -7.4      | -7.4       | -7.3      | -7.6       | 1.70               |
| ZINC00472402              | -7.3    | -4.6              | -5      | -4.4    | -6.7    | -6.2    | -4.9    | -5.9    | -6.9    | -4.3    | -6.1    | -4.7    | -4.7    | -4.9    | -5.4    | -4.8    | -4.7    | -5.8    | -6.3             | -6.5    | -3.1       | -6.2       | -5.8       | -6         | -6.3     | -7.1              | -6.8      | -7.4       | -7.4      | -7.5       | 1.12               |
| ZINC00510757              | -7.6    | -6.1              | -4.7    | -5.1    | -7.2    | -6.7    | -7.2    | -5      | -8.4    | -5.6    | -7.2    | -4.6    | -5.2    | -5.4    | -6.8    | -4.4    | -6.5    | -6.3    | -6.7             | -6.8    | -3         | -6.4       | -6.8       | -7         | -7.6     | -7                | -7.5      | -7.6       | -7.3      | -7.9       | 1.24               |
| ZINC00548425              | -7.6    | -6.1              | -5.2    | -5      | -7.3    | -7.1    | -6.5    | -4.6    | -7      | -3.3    | -6.9    | -3.4    | -6.4    | -3.7    | -6.9    | -3.8    | -6.8    | -6.8    | -7.3             | -6.8    | -4.2       | -5.7       | -7.2       | -5.9       | -7.6     | -7.1              | -7.3      | -7.5       | -7.4      | -7.7       | 1.39               |
| ZINC00553091              | -7.4    | -5.4              | -5.3    | -4.5    | -6.9    | -6.7    | -5.5    | -5.2    | -8.4    | -4.9    | -7.5    | -4.3    | -6      | -6.1    | -6.2    | -5      | -6.4    | -6.4    | -7.5             | -7.1    | -5.1       | -6.7       | -7.1       | -7.2       | -7.7     | -7.2              | -7.5      | -7.6       | -7.4      | -7.7       | 1.11               |
| ZINC00553275              | -6.6    | -4                | -3.5    | -2.2    | -7.5    | -7.3    | -5.3    | -3.6    | -6.9    | -2.2    | -6.6    | 2.5     | -4.7    | -3.9    | -5.9    | -2.5    | -4.8    | -6.6    | -6.9             | -6.1    | -4.7       | -5.2       | -6.7       | -5.9       | -7.1     | -7.4              | -7.4      | -7.3       | -7.7      | -7.6       | 2.26               |
| ZINC00558036              | -7.5    | -5.2              | -2.7    | -1.4    | -6.2    | -6.4    | -5.5    | -3.9    | -7.5    | -2.7    | -6.7    | -1.6    | -5.1    | -2.7    | -5.8    | 1.3     | -6.5    | -6.2    | -7               | -6.4    | -5.1       | -6.3       | -6.5       | -5.1       | -8       | -7                | -7.2      | -7.6       | -7.2      | -7.7       | 2.95               |
| ZINC00581586              | -7.6    | -5.6              | -4.5    | -4      | -7.4    | -5.3    | -6.4    | -4.8    | -5.4    | -4      | -4.8    | -2      | -4.6    | -5.5    | -5.1    | -4.1    | -4.5    | -6.5    | -5.7             | -7.2    | -6.7       | -6.4       | -6.8       | -6         | -6.3     | -7.5              | -6.5      | -7.5       | -7.6      | -7.4       | 2.65               |
| ZINC01019466              | -7.3    | -7.4              | -7.4    | -6.5    | -6.6    | -7.4    | -6.3    | -6.4    | -6.5    | -6.2    | -6.1    | -5.3    | -5.4    | -6.5    | -5.6    | -5.1    | -6.3    | -5.9    | -7.5             | -7      | -3         | -6.1       | -8.2       | -7.1       | -8.2     | -8.3              | -8.5      | -8.3       | -8.7      | -8.5       | 1.26               |
| ZINC01218762              | -7.5    | -5.1              | -2.8    | -1.6    | -6.7    | -6.3    | -4.9    | -2.7    | -6.3    | -0.4    | -5.9    | -0.3    | -5.1    | -3.7    | -6.5    | -3.2    | -4.8    | -7.1    | -7.7             | -6.6    | -2.7       | -5.2       | -7.3       | -5.6       | -7.1     | -7.5              | -7.2      | -7.4       | -7.5      | -7.5       | 2.21               |
| ZINC01274167              | -7.7    | -4.9              | -2.9    | -3.8    | -7      | -6.7    | -6.3    | -2.8    | -7.5    | -2.6    | -6.5    | 1       | -6.1    | -4.2    | -6.8    | -2.4    | -5.6    | -7.2    | -7.4             | -6.7    | -1.2       | -6.4       | -6.6       | -6.3       | -8       | -7.1              | -7.8      | -7.6       | -7.6      | -7.7       | 2.28               |
| ZINC01319141              | -7.9    | -6.6              | -6.7    | -5.6    | -6.6    | -6.3    | -6.1    | -6.7    | -6.6    | -6.2    | -6.2    | -6.8    | -5.9    | -6.7    | -7      | -6.3    | -6.1    | -6.3    | -6.7             | -6.4    | 7.7        | -4.8       | -6.8       | -6.7       | -7.2     | -7.5              | -6.7      | -7.6       | -8        | -7.7       | 2.70               |
| ZINC01390329              | -8      | -2.2              | -1      | 0.5     | -8.2    | -7.3    | -5.5    | 0.9     | -8.5    | -1.4    | -7.8    | 2.2     | -6.5    | 4.3     | -7.8    | 1.9     | -5.6    | -7.6    | -7.8             | -7.5    | -4.5       | -5.7       | -7.4       | -4.9       | -7.7     | -7.8              | -7.2      | -8         | -7.8      | -8         | 3.79               |
| ZINC01430662              | -7.3    | -5.5              | -3.2    | -1.5    | -6.9    | -6.6    | -6.4    | -0.7    | -8      | -0.6    | -7.8    | -1.2    | -7.4    | 0       | -6.8    | -2.5    | -6.7    | -6      | -7               | -6.3    | -4.6       | -6.3       | -7.1       | -5.6       | -6.9     | -6.9              | -6.4      | -7.8       | -7        | -7.8       | 2.47               |
| ZINC01431355              | -7.5    | -5.8              | -2.4    | -2.5    | -6      | -5.9    | -6.7    | -3.2    | -7.8    | -3.9    | -7.3    | -4.2    | -7      | -2.9    | -6.8    | -2.2    | -6      | -6.2    | -7.2             | -6.5    | -5.1       | -6         | -6.8       | -5.4       | -6.8     | -7.1              | -6.6      | -7.5       | -7        | -7.6       | 1.71               |
| ZINC01461168              | -7.5    | -6.7              | -5.6    | -5.7    | -6.7    | -6.5    | -5.9    | -6.4    | -6.3    | -6.5    | -6.2    | -6.4    | -6.6    | -6.5    | -6.4    | -5.9    | -5.9    | -6.6    | -7.3             | -6.5    | -2.8       | -7.4       | -6.9       | -6.6       | -7       | -7.2              | -7.4      | -7.1       | -7.4      | -7.3       | 0.88               |
| ZINC01668172              | -8.1    | -6.4              | -6.4    | -5.4    | -7.9    | -7.7    | -6.3    | -6      | -8.5    | -6.1    | -7.1    | -5.7    | -6.6    | -6.5    | -7.5    | -5.4    | -6      | -6.4    | -8.2             | -7.8    | -4.9       | -7.5       | -7.8       | -7.2       | -7.7     | -7.9              | -7.5      | -8.3       | -8.2      | -8.3       | 1.02               |
| ZINC01728902              | -7.2    | -6                | -6.1    | -5.7    | -6.2    | -6      | -5      | -5.7    | -6.6    | -5.3    | -6.4    | -4.2    | -5.1    | -5.7    | -5.7    | -5.1    | -5.8    | -7.4    | -6.9             | -5.3    | -4.6       | -5.3       | -6.9       | -6.1       | -8       | -7.5              | -8        | -7.6       | -7.8      | -8         | 1.08               |
| ZINC02519816              | -7.5    | -6.7              | -5.8    | -6.4    | -6.8    | -6.6    | -5.7    | -5.7    | -8.5    | -5.7    | -7.1    | -5.5    | -6.9    | -5.9    | -6.7    | -5.5    | -6.6    | -7      | -7.1             | -6.6    | -4.6       | -7.8       | -7.3       | -6.9       | -6.8     | -7.1              | -7.4      | -6.8       | -7.4      | -7.6       | 0.83               |
| ZINC02621062              | -7.8    | -4.1              | -2.5    | -1.7    | -7.3    | -7.1    | -5.8    | -0.8    | -7.9    | 0.1     | -7.3    | -5      | -5.7    | 0.8     | -6.2    | -0.2    | -5.4    | -7      | -6.7             | -6.8    | -4.6       | -5.1       | -6.6       | -5.4       | -7.7     | -6.8              | -7.7      | -7.6       | -7.5      | -7.9       | 2.63               |
| ZINC02649325              | -7.4    | -5.5              | -5.6    | -5.5    | -7.3    | -7      | -5.7    | -6      | -7.4    | -5.4    | -6.8    | -5.3    | -5.8    | -6      | -6.4    | -5.6    | -6      | -6.2    | -7.6             | -7.1    | -5.1       | -6.4       | -6.9       | -6.4       | -7.3     | -7.5              | -7.3      | -7.7       | -7.5      | -7.5       | 0.84               |
| ZINC02673507              | -7.7    | -6.1              | -5.4    | -4.6    | -7.2    | -6.8    | -7.2    | -4.3    | -8.6    | -4.9    | -7.9    | -4.6    | -6.6    | -5.7    | -7.6    | -4.4    | -7.1    | -6.5    | -7.6             | -7.3    | -5.5       | -7         | -7.5       | -7.1       | -8       | -7.4              | -7.2      | -7.9       | -7.4      | -7.9       | 1.22               |
| ZINC02746751              | -7.6    | -6.4              | -4.3    | -3.8    | -6.5    | -6.1    | -5.8    | -5.5    | -7.1    | -3.4    | -6.4    | -2.7    | -5      | -5.8    | -6.4    | -5.6    | -4.8    | -6.7    | -6.6             | -6.3    | -0.2       | -7         | -6.6       | -7.4       | -7.3     | -7.4              | -7.4      | -7.4       | -6.6      | -7.5       | 1.68               |
| ZINC02794477              | -7.5    | -5.6              | -5.5    | -5      | -7.2    | -6.9    | -7.2    | -5.7    | -7.8    | -5.8    | -7.3    | -3.7    | -7      | -4.9    | -7.6    | -4.1    | -6.7    | -6.6    | -7.3             | -6.4    | -3.2       | -6.6       | -6.4       | -7.1       | -7.4     | -6.9              | -6.9      | -7.8       | -7.4      | -7.8       | 1.24               |
| ZINC02981378              | -7.7    | -4.5              | -4.8    | -2.4    | -7.7    | -7.2    | -6      | -5.3    | -6.9    | -3.8    | -6.2    | -2.2    | -5      | -5.8    | -6.3    | -2      | -4.9    | -6.8    | -7.5             | -7      | -2.5       | -7.3       | -8.1       | -6.5       | -7.6     | -7.6              | -7.9      | -7.5       | -7.9      | -7.6       | 1.88               |
| ZINC03007456              | -8      | -3.6              | -3.2    | 0.8     | -6.7    | -6.2    | -5.5    | -3.5    | -7.8    | -0.6    | -6.8    | 1.3     | -5.8    | -3.1    | -5.8    | -0.5    | -6.3    | -6.3    | -5.9             | -5.8    | -4.4       | -5.8       | -6.2       | -6.1       | -8       | -6.4              | -7.3      | -7.9       | -7.2      | -8.1       | 2.60               |
| ZINC03296439              | -6.1    | -5.2              | -5.3    | -5.3    | -6.6    | -5.7    | -5.1    | -5.9    | -7.3    | -5.1    | -5.8    | -5.1    | -4.9    | -6.1    | -5.2    | -5.2    | -5.2    | -5.7    | -6.5             | -5.7    | -4.5       | -6.9       | -6         | -6.3       | -6.9     | -7.2              | -6.4      | -7.6       | -7.6      | -7.2       | 0.87               |
| ZINC03341918              | -7.6    | -6                | -5.8    | -5.3    | -6.9    | -6.5    | -5.9    | -6      | -8.1    | -5.7    | -7      | -5.1    | -7.2    | -6.6    | -6.5    | -5.1    | -6.4    | -6.6    | -7.4             | -6.5    | -5.9       | -7.2       | -6.7       | -6.6       | -7.2     | -7.2              | -7.4      | -7.4       | -7.7      | -7.6       | 0.80               |
| ZINC03373576              | -7.5    | -5.3              | -2.5    | -4.7    | -6.8    | -6.6    | -6.8    | -0.4    | -9      | -1.8    | -6.8    | -2.5    | -6.5    | 1       | -7.1    | -1.9    | -5.5    | -6.6    | -7.1             | -6.9    | -3.7       | -4.9       | -6.6       | -5.1       | -8.2     | -7                | -7.3      | -7.5       | -7.2      | -7.7       | 2.46               |
| ZINC03542226              | -7.5    | -6.1              | -5.8    | -5.8    | -7.1    | -7.1    | -5.9    | -6.2    | -7.9    | -5.7    | -7.3    | -5.1    | -6      | -6.7    | -6.7    | -5.7    | -6.5    | -6.4    | -6.              |         |            |            |            |            |          |                   |           |            |           |            |                    |

|                |      |      |      |      |      |      |      |      |      |      |      |      |      |      |      |      |      |      |      |      |      |      |      |      |      |      |      |      |      |      |      |
|----------------|------|------|------|------|------|------|------|------|------|------|------|------|------|------|------|------|------|------|------|------|------|------|------|------|------|------|------|------|------|------|------|
| ZINC06117670   | -7.5 | -6.2 | -5.6 | -5.5 | -6   | -6.1 | -6.4 | -6.5 | -7.6 | -5.9 | -7.1 | -5.4 | -6.1 | -7.2 | -5.9 | -5.1 | -6.2 | -6.2 | -7.1 | -6.3 | -2.5 | -7.5 | -7   | -7.1 | -7.7 | -7   | -7.6 | -7.6 | -7.3 | -7.8 | 1.08 |
| ZINC06188281   | -7.5 | -4.7 | -4.3 | -3   | -6.6 | -6.7 | -5.2 | -4.8 | -7.6 | -4.9 | -6.7 | -6   | -5.2 | -4.9 | -5.9 | -3.9 | -6   | -6   | -7.8 | -6.7 | -4.9 | -6.5 | -6.1 | -6.1 | -7.8 | -7.2 | -7.4 | -7.6 | -7.4 | -7.7 | 1.29 |
| ZINC06210959_1 | -7.5 | -5.8 | -5.3 | -3.2 | -6.8 | -6.4 | -6.3 | -3.8 | -7.5 | -3.6 | -7   | -3.6 | -5.6 | -5   | -6.7 | -2.7 | -6.4 | -6.9 | -6.9 | -6.7 | -4.4 | -6.2 | -6.2 | -5.7 | -7.7 | -7.6 | -7.3 | -7.6 | -7.5 | -7.7 | 1.48 |
| ZINC06217532   | -7.6 | -5.5 | -2.5 | -3.4 | -6.4 | -6   | -5.8 | -2.1 | -7.9 | -1.3 | -6   | 0.5  | -7.1 | 2.3  | -6   | -2   | -5.7 | -5.9 | -5.6 | -6.2 | -3.7 | -5.8 | -6.6 | -5.1 | -6.9 | -6.7 | -7.1 | -7.6 | -7.3 | -7.6 | 2.53 |
| ZINC06217532_1 | -7.6 | -5   | -3.6 | -3.6 | -6.2 | -6   | -6   | -1.2 | -7.7 | -2.2 | -5.9 | -0.8 | -7.1 | -3   | -5.5 | -1.8 | -5.7 | -6.1 | -6.1 | -5.5 | -4.9 | -5.7 | -6.6 | -5.4 | -6.5 | -6.7 | -6.9 | -7.6 | -7.1 | -7.6 | 1.94 |
| ZINC06433998   | -7.5 | -5.5 | -5.8 | -4.8 | -7.1 | -6.1 | -5.8 | -6.4 | -6.9 | -5   | -6.8 | -4.6 | -4.9 | -5.9 | -6.6 | -5   | -6.1 | -7   | -7.2 | -6.5 | -3.9 | -6   | -6.8 | -6.4 | -7.5 | -7.2 | -7.4 | -7.3 | -7.5 | -7.5 | 1.01 |
| ZINC06438308   | -7.5 | -4.8 | -4.8 | -4.1 | -6.5 | -6.3 | -5.1 | -4.4 | -7.5 | -6.1 | -6.6 | -5.5 | -5.1 | -4.8 | -6.1 | -4.4 | -4.8 | -6.4 | -7.1 | -7.3 | -5.4 | -5.9 | -6.4 | -5.6 | -7.9 | -7.3 | -7.5 | -7.5 | -7.4 | -7.8 | 1.17 |
| ZINC06507008   | -7.5 | -6   | -5.8 | -5.8 | -7   | -6.5 | -6.9 | -6.3 | -8.4 | -5.9 | -7.3 | -6.5 | -5.8 | -7   | -7.1 | -5.7 | -6.3 | -6.1 | -7.4 | -6.7 | -4.6 | -7   | -6.6 | -7   | -8   | -6.9 | -7.4 | -7.8 | -7.4 | -7.9 | 0.83 |
| ZINC06555344   | -7.5 | -5.9 | -5.5 | -5.1 | -7.2 | -6.7 | -6.3 | -5.5 | -8.9 | -4.7 | -6.9 | -5.4 | -5.7 | -6.4 | -6.3 | -5.6 | -6.1 | -7.4 | -7.2 | -5.7 | -1.4 | -7.1 | -6.8 | -7.4 | -7.6 | -7.5 | -7.6 | -7.9 | -7.6 | -7.9 | 1.39 |
| ZINC06556210   | -6   | -5.9 | -6.1 | -5.7 | -6.3 | -6.6 | -6.4 | -6.4 | -7.2 | -6.1 | -5.8 | -5.8 | -6.5 | -7   | -6.2 | -5.8 | -6.3 | -5.8 | -7.1 | -6.7 | -2.4 | -5.9 | -7.5 | -7.1 | -7.3 | -7.5 | -7.4 | -7.9 | -7.8 | -7.9 | 1.07 |
| ZINC06589770   | -7.6 | -3.9 | -3.1 | -2.7 | -7.1 | -6.9 | -6.3 | -1.9 | -8.2 | 0.2  | -6.9 | -4.9 | -6.4 | -5.5 | -7.2 | 1.3  | -5.8 | -6.7 | -7.3 | -7   | -5   | -6.5 | -6.9 | -7.7 | -7.9 | -7.2 | -7.8 | -7.5 | -7.8 | -7.9 | 2.39 |
| ZINC06603321   | -7.5 | -5.1 | -5.2 | -5.2 | -7   | -6.5 | -6.1 | -5.4 | -7.7 | -5.1 | -6.7 | -5   | -6.6 | -6   | -6.2 | -5   | -6.6 | -6.4 | -7.2 | -7   | -4.7 | -6.6 | -7   | -6.2 | -7.3 | -7.5 | -7.2 | -7.9 | -7.5 | -7.7 | 0.97 |
| ZINC06650423   | -7.6 | -6.2 | -5.8 | -5.7 | -6.8 | -6.5 | -6.6 | -6.3 | -7.3 | -5.7 | -7.1 | -5.5 | -6.3 | -6.9 | -6.3 | -5   | -6.6 | -7.4 | -6.1 | -7.2 | -2.2 | -6.9 | -6.7 | -7.2 | -7   | -6.6 | -7   | -7.5 | -7   | -7.8 | 1.05 |
| ZINC06697378   | -7.5 | -5.4 | -0.5 | 1.5  | -6.8 | -5   | -3.7 | -1.8 | -7.9 | 1    | -6   | 1.8  | -6.6 | 0    | -7   | 1.8  | -6.8 | -6.2 | -5.6 | -7.1 | -4   | -5.9 | -6.3 | -7.1 | -7.6 | -7.4 | -6.8 | -7.7 | -7.5 | -7.6 | 3.22 |
| ZINC06698804   | -7.9 | -4.4 | -4   | -3.6 | -6.2 | -6.4 | -5.7 | -3.6 | -7.8 | -4.6 | -6   | -3.6 | -6.2 | -4.1 | -5.8 | -0.4 | -5.8 | -5.8 | -6.4 | -6.2 | -4.4 | -5.7 | -7.1 | -5.8 | -7.5 | -7.1 | -7.5 | -7.8 | -7.4 | -8.3 | 1.73 |
| ZINC06778316   | -7.5 | -4.8 | -4.5 | -5   | -6.7 | -6.8 | -6.1 | -4.4 | -7.9 | -5.1 | -6.6 | -5.8 | -6.1 | -4.6 | -6.5 | -4.1 | -5.8 | -6   | -7.1 | -7.1 | -4.7 | -6.4 | -6.6 | -5.5 | -7.2 | -7.3 | -7.4 | -7.3 | -7.2 | -7.3 | 1.10 |
| ZINC06900632   | -7.6 | -5.6 | -1.5 | -0.8 | -7.2 | -6.8 | -6.3 | -2.8 | -8.2 | -1.6 | -7.8 | -3.2 | -6.1 | -1.5 | -6.8 | -1.8 | -6.2 | -6.7 | -7.9 | -6.9 | -3.6 | -5.9 | -7.1 | -5.3 | -7.2 | -7.2 | -7.6 | -7.4 | -7.4 | -7.8 | 2.33 |
| ZINC0690626_1  | -7.9 | -7.1 | -6.3 | -5.4 | -6.7 | -6.9 | -6   | -7.5 | -8.5 | -6.9 | -6.8 | -6.3 | -6.4 | -7.4 | -6.7 | -6.6 | -6.7 | -6.6 | -7.3 | -7.2 | -4.7 | -7.3 | -7.3 | -7.1 | -7.3 | -7.4 | -7.1 | -7.9 | -7.8 | -7.8 | 0.76 |
| ZINC06928794_1 | -7.7 | -6.2 | -3.6 | -4.1 | -7.8 | -7.2 | -7.3 | -1.8 | -9.7 | -1.9 | -8.2 | -0.9 | -7.5 | -0.5 | -7.4 | -3.1 | -6.4 | -7.6 | -8.1 | -7.1 | -3.7 | -4.3 | -6.7 | -5.4 | -8   | -7.4 | -7.1 | -8   | -7.3 | -8   | 2.45 |
| ZINC06969726   | -7.4 | -5.6 | -2.8 | -2.6 | -7.1 | -6.7 | -6.3 | -1.1 | -8.8 | -2.5 | -7.1 | -3.2 | -7.1 | 0.6  | -7.1 | -1.9 | -6.1 | -6.8 | -7.5 | -7.2 | -4.2 | -6.1 | -6.7 | -5.5 | -7.6 | -7   | -6.8 | -7.3 | -7.2 | -7.6 | 2.32 |
| ZINC06971385   | -7.7 | -5.2 | -5.7 | -5.4 | -6.4 | -6.7 | -6.6 | -6.2 | -8.3 | -5.5 | -7.3 | -5   | -5.7 | -6.6 | -6.7 | -5.4 | -6.7 | -6.2 | -7.6 | -7.5 | 0.1  | -6.7 | -6.6 | -6.8 | -7.9 | -7.1 | -7.7 | -7.7 | -7.6 | -8   | 1.54 |
| ZINC07136518   | -7.5 | -6   | -4.4 | -4.1 | -7.9 | -7.1 | -7   | -2.2 | -9.1 | -3.3 | -7.5 | -4.1 | -6.4 | -3.4 | -7   | -3   | -5.9 | -6.3 | -7.5 | -7   | -4.2 | -6.4 | -6.7 | -5.4 | -8   | -7.2 | -7.2 | -7.5 | -7.1 | -7.7 | 1.75 |
| ZINC07268883   | -7.5 | -4.2 | -5.1 | -3.7 | -7.2 | -6.7 | -4.8 | -4.4 | -7.1 | -5.1 | -6.8 | -5   | -4.7 | -5.7 | -5.2 | -4.8 | -4.5 | -5.4 | -6.9 | -6.7 | -2.3 | -6.6 | -6.8 | -6   | -7.5 | -7.1 | -7.5 | -7.3 | -7.4 | -7.5 | 1.38 |
| ZINC07490443   | -6.6 | -4.9 | -3.6 | 2.1  | -7.3 | -6.9 | -5.7 | -2.6 | -8   | -0.8 | -7.7 | 3.6  | -5.2 | 1.4  | -6.4 | -1.9 | -6.7 | -6.1 | -7.5 | -6.4 | -2.5 | -6   | -7.2 | -4.7 | -7.2 | -6.8 | -6.9 | -7   | -6.9 | -7.1 | 3.10 |
| ZINC07570645   | -7.9 | -6.7 | -4.3 | -4.4 | -6.7 | -6.7 | -6.2 | -5.5 | -7.7 | -4.9 | -7   | -0.5 | -6.6 | -4.1 | -7.2 | -3.7 | -6.1 | -6.4 | -7.7 | -6.8 | -3.7 | -5.8 | -7.3 | -7.1 | -7.6 | -7.4 | -7.3 | -8   | -7.7 | -8   | 1.70 |
| ZINC07670817   | -7.5 | -4.8 | -2.4 | -3.1 | -7.6 | -7.1 | -5.9 | -1.4 | -8.3 | -0.8 | -6.9 | -2.4 | -6.6 | -0.1 | -7.2 | -1.7 | -5.5 | -7   | -7.3 | -7   | -5.3 | -6.1 | -6.2 | -5.2 | -7.9 | -7.2 | -7.1 | -7.5 | -7.3 | -7.6 | 2.51 |
| ZINC07774656   | -7.5 | -5.3 | -2.4 | -2.3 | -6.7 | -5.9 | -6.2 | -3.3 | -8.5 | 0.2  | -6.7 | -4.3 | -6.8 | -2.6 | -6.8 | -0.7 | -5.8 | -6.6 | -7.4 | -6.9 | -4.8 | -5.8 | -6.7 | -6.1 | -7.1 | -7.1 | -7.2 | -7   | -7.2 | -7.4 | 2.16 |
| ZINC07810502   | -6.9 | -6.2 | -4.5 | -3.6 | -7.3 | -7.6 | -7.6 | -1.2 | -9.6 | -1.7 | -7   | -0.5 | -7.5 | -2.7 | -7.4 | -2.5 | -6.4 | -7.8 | -8.2 | -7.4 | -0.8 | -5.9 | -6.7 | -5.9 | -7.3 | -7.6 | -7.4 | -8.1 | -7.3 | -8.2 | 2.52 |
| ZINC07988131   | -7.5 | -6.7 | -4.9 | -4.6 | -7.6 | -6.9 | -7.6 | -2.4 | -9.3 | -3   | -7.7 | -1.7 | -7.8 | -3   | -7.7 | -3.5 | -6.4 | -7.1 | -7.8 | -7.1 | -4.4 | -6.5 | -6.8 | -5.4 | -7.7 | -7.2 | -6.9 | -7.9 | -7.2 | -7.7 | 1.93 |
| ZINC08144837   | -7.5 | -6   | -4.5 | -4.3 | -7.2 | -6.6 | -6.8 | -2.4 | -8.8 | -2.4 | -7.4 | -2.1 | -7.4 | -1.8 | -7.3 | -3.1 | -6   | -6.6 | -7.8 | -7   | -4   | -4.5 | -6.6 | -6.1 | -7.6 | -7   | -7.1 | -7.5 | -7.3 | -7.7 | 1.98 |
| ZINC08265027   | -7.7 | -4.1 | -2.9 | -2.6 | -7.4 | -6.6 | -5.4 | -2.2 | -7.5 | 0.2  | -7.2 | -1.6 | -5.6 | -2.8 | -6.1 | 0    | -5.2 | -5.9 | -6.3 | -6.8 | -4.7 | -6.2 | -6.4 | -6.1 | -6.9 | -7.2 | -7.2 | -7   | -7.5 | -7.3 | 2.29 |
| ZINC08404538   | -7.5 | -3.3 | -1.9 | 1.3  | -6.3 | -5.9 | -5.8 | -2.2 | -8.5 | -1.9 | -6.3 | -4   | -4.5 | -3.1 | -5.5 | 3.2  | -6   | -5.6 | -6.9 | -5.6 | -4.8 | -5.6 | -6.5 | -6.3 | -7.6 | -6.7 | -7.3 | -7.4 | -7.3 | -7.6 | 2.67 |
| ZINC08405446   | -7.6 | -5.7 | -6.3 | -5.6 | -7.5 | -6.7 | -7.2 | -5.1 | -9   | -5.3 | -7.2 | -5.5 | -6.8 | -6   | -7.4 | -5   | -6.9 | -6.8 | -7.6 | -7   | -4.8 | -7.1 | -6.7 | -6.8 | -8   | -7   | -7.3 | -7.6 | -7.2 | -7.7 | 0.99 |
| ZINC08718319   | -7.5 | -5.6 | -4.4 | -3.1 | -7.5 | -7   | -5.2 | -3.4 | -8.3 | -2.6 | -7.1 | -0.8 | -7   | 1.2  | -7   | -3.4 | -6.2 | -6.4 | -7.8 | -6.4 | -3.6 | -4.1 | -7   | -5.6 | -7.5 | -7.4 | -7.1 | -7.3 | -7.5 | -7.5 | 2.30 |
| ZINC08776738_1 | -7.5 | -6.5 | -3   | -4.5 | -7.1 | -6.7 | -7   | -1.9 | -9.3 | -2.3 | -7.3 | -3.3 | -7.3 | -0.1 | -7   | -2.4 | -6.2 | -6.3 | -8   | -7.2 | -3.7 | -6.6 | -7   | -5.2 | -7.9 | -7   | -7.3 | -7.7 | -7.2 | -7.7 | 2.24 |
| ZINC08910732   | -7.5 | -4.9 | -4   | -4.3 | -6.9 | -6.7 | -6.1 | -3.2 | -7.2 | -4.4 | -7.1 | -4.4 | -6.4 | -5.5 | -7   | -2.8 | -5.3 | -6.7 | -6.9 | -6.7 | -4.4 | -5.8 | -6.8 | -6   | -7.4 | -7   | -7.3 | -7.3 | -7.3 | -7.5 | 1.37 |
| ZINC08920255   | -7.5 | -6.5 | -5.1 | -0.4 | -7.3 | -6.7 | -7.2 | -2.9 | -8   | -1.3 | -7.9 | -3.1 | -8.1 | -0.7 | -7.3 | -2.9 | -7.3 | -7   | -7.4 | -6.8 | -4.7 | -5.9 | -6.6 | -5.4 | -7.3 | -6.5 | -7.2 | -7.7 | -7.3 | -7.7 | 2.26 |
| ZINC08920741   | -7.5 | -5.7 | -4   | -4.8 | -6.7 | -6.2 | -6.8 | -1.6 | -8.1 | -4.8 | -7.7 | -3.6 | -7.4 | -0.9 | -6.9 | -2.6 | -6.3 | -6.9 | -7.2 | -6.6 | -4.1 | -6.7 | -6.6 | -5.3 | -7.2 | -6.4 | -7   | -7.3 | -6.7 | -7.5 | 1.83 |
| ZINC08976410   | -7.8 | -5.1 | -0.7 | 1.7  | -7.6 | -6.9 | -6.7 | -0.9 | -8.6 | -0.9 | -7.3 | -5.1 | -6.1 | -4.2 | -7   | -1.5 | -6.3 | -6.9 | -7.5 | -6.8 | -5   | -7.1 | -7.6 | -6.1 | -7.7 | -8.3 | -8.2 | -8.2 | -8.2 | -8   | 2.73 |
| ZINC09001694   | -7.6 | -4.8 | -2.2 | -3.5 | -7.4 | -7   | -5.9 | -0.8 | -8.3 | -2.6 | -6.9 | -3.7 | -6.2 | 0.9  | -7.1 | -1.3 | -5.9 | -6.4 | -7.5 | -7.5 | -5.1 | -6.4 | -6.4 | -4.8 | -7.8 | -7.3 | -7.5 | -7.6 | -7.5 | -7.7 | 2.40 |
| ZINC09046702   | -7.6 | -6.7 | -3.6 | -2.6 | -7.4 | -6.7 | -7.3 | -0.3 | -8.7 | -2.9 | -7.5 | 0.1  | -7.2 | 2.7  | -7.2 | -2.6 | -5.5 | -7   | -7.4 | -6.9 | 0.5  | -4.9 | -6.8 | -5.2 | -7.4 | -7.2 | -7.5 | -7.6 | -7.3 | -7.7 | 2.97 |
| ZINC09050320   | -7.6 | -6.3 | -5.3 | -5.6 | -7.5 | -7.2 | -6.9 | -6.1 | -8   | -6   | -7.8 | -5.7 | -5.5 | -6.2 | -6.7 | -5.8 | -7.2 | -5.3 | -7.4 | -6.6 | -3.8 | -7   | -7   | -6.1 | -8.3 | -7.3 | -7.9 | -7.8 | -7.8 | -8.2 | 1.07 |
| ZINC09088593_1 | -7.6 | -4.1 | -3.4 | -1.9 | -6.1 | -6.5 | -4.5 | -3.5 | -6.7 | -3.8 | -6.1 | 0.6  | -4.3 | -5.6 | -6.3 | -1.7 | -4.4 | -6.5 | -7.1 | -5.9 | 1.5  | -6.8 | -7.1 | -6   | -7   | -6.6 | -7.4 | -7.4 | -7.5 | -7.6 | 2.38 |
| ZINC09114437   | -7.7 | -4.1 | -4   | -3.5 | -7.1 | -7.2 | -6.1 | -3.8 | -8.3 | -4.1 | -6.9 | -3.4 | -6.5 | -5.7 | -7.4 | 0.5  | -5.7 | -6.5 | -7.2 | -6.8 | -5.3 | -6.8 | -7.3 | -5.9 | -8.2 | -7.2 | -8.1 | -7.6 | -7.5 | -7.9 | 1.94 |
| ZINC09341994   | -7.5 | -4.4 | -4.4 | -3.5 | -7.7 | -6.9 | -5.2 | -4.3 | -8.2 | -5.7 | -7.3 | -5.6 | -5.9 | -5.5 | -7.2 | -5.6 | -5.8 | -7.4 | -7.4 | -5.5 | -6.9 | -7.1 | -6.1 | -7.9 | -7.6 | -7.4 | -7.4 | -7.4 | -7.7 | -7.8 | 1.94 |
| ZINC09155323   | -7.1 | -6   | -5.1 | -4.6 | -7.2 | -6.3 | -6   | -5.2 | -8   | -4.8 | -7   | -4.2 | -4.8 | -5.5 | -6.9 | -4.6 | -5.8 | -5.9 | -6.5 | -6.7 | -5.9 | -6.8 | -7   | -6.5 | -6.8 | -7.3 | -6.7 | -7.5 | -7.3 | -7.2 | 1.01 |
| ZINC09217125   | -7.7 | -5.2 | -6   | -5.1 | -5.5 | -6.1 | -4.9 | -5.9 | -6.7 | -3.4 | -6   | -3.2 | -5.3 | -5.8 | -6   | -4   | -6.6 | -6.5 | -5.9 | -6   | -2.1 | -7.4 | -7.8 | -6.4 | -6.8 | -7   | -7.1 | -6.5 | -6.9 | -7.7 | 1.35 |
| ZINC09219511   | -7.6 | -4.8 | -2   | -3.3 | -7.3 | -6.8 | -6.  |      |      |      |      |      |      |      |      |      |      |      |      |      |      |      |      |      |      |      |      |      |      |      |      |

|                |      |      |      |      |      |      |      |      |      |      |      |      |      |      |      |      |      |      |      |      |      |      |      |      |      |      |      |      |      |      |      |
|----------------|------|------|------|------|------|------|------|------|------|------|------|------|------|------|------|------|------|------|------|------|------|------|------|------|------|------|------|------|------|------|------|
| ZINC13127125   | -8.2 | -5.3 | -2.8 | -1.8 | -7.3 | -7   | -5   | -3.7 | -6.7 | -5   | -5.3 | -1.3 | -5.5 | -2.9 | -5   | -2.3 | -4.1 | -7   | -7.6 | -6.8 | -4.5 | -6.6 | -6.4 | -6.4 | -7.8 | -7.6 | -8   | -8   | -8.3 | -8.4 | 2.07 |
| ZINC13267073   | -7.8 | -4.6 | -4.2 | -4.3 | -7.4 | -7   | -5.6 | -4.2 | -7.8 | -2.5 | -7   | -0.8 | -4.1 | -4.2 | -5.7 | -0.6 | -5.8 | -6.3 | -6.7 | -7.1 | -3   | -7.1 | -6.8 | -5.7 | -7.5 | -7.4 | -7.2 | -7.6 | -7.8 | -7.7 | 2.05 |
| ZINC13365186   | -6.6 | -5   | -2.5 | -3.1 | -6.1 | -5.9 | -6.2 | -3.8 | -7.8 | -4   | -6.2 | -6.2 | -6.5 | -4.6 | -5.7 | -0.3 | -5   | -6.2 | -6.5 | -6.5 | -5   | -6.3 | -7   | -6   | -7   | -6.9 | -7.1 | -7.3 | -7.5 | -7.5 | 1.66 |
| ZINC13365916   | -7.6 | -6.8 | -5.7 | -5.9 | -6.1 | -6.2 | -5.8 | -7.4 | -6.4 | -6   | -5.5 | -5.8 | -6.5 | -6.7 | -6.5 | -6   | -6.4 | -6.9 | -6.3 | -1.1 | -6.6 | -7.5 | -7.2 | -6.8 | -7   | -6.6 | -7.3 | -7.5 | -7.6 | 1.17 |      |
| ZINC13365940   | -7.6 | -6.7 | -5.9 | -5.4 | -6.3 | -6.1 | -6.1 | -7.3 | -6.9 | -6.1 | -6.6 | -4.9 | -5.8 | -6.6 | -6.5 | -6.6 | -6   | -6.7 | -7   | -6.7 | -6.9 | -5.1 | -6.2 | -6.4 | -6.2 | -7.7 | -7.5 | -7.8 | -7.6 | -7.6 | 1.24 |
| ZINC13543958   | -7.6 | -6.3 | -4.8 | -5.2 | -7.5 | -7.3 | -6.7 | -4.1 | -7.4 | -5.2 | -7.8 | -5.6 | -4.8 | -5.1 | -7.2 | -3.6 | -6.2 | -7   | -7.3 | -6.9 | -5.1 | -6.2 | -6.4 | -6.2 | -7.7 | -7.5 | -7.8 | -7.6 | -7.6 | -7.8 | 1.22 |
| ZINC13543958_1 | -7.9 | -6.1 | -3.2 | -5   | -7.7 | -6   | -6.9 | -3.7 | -7.6 | -3.9 | -7.8 | -3.7 | -7.1 | -5.2 | -7.3 | -0.4 | -7.1 | -7   | -7.9 | -6.9 | -3.9 | -6.3 | -6.6 | -6.1 | -7.7 | -7.1 | -7.9 | -7.4 | -7.7 | -7.7 | 1.83 |
| ZINC13561604_1 | -7.5 | -5.1 | -5.1 | -5.1 | -6.8 | -6.2 | -4.8 | -5.3 | -7.4 | -5.4 | -6.9 | -5.8 | -5.2 | -5.6 | -6.3 | -4.5 | -5.5 | -5.8 | -6.8 | -6.8 | -5.2 | -6.6 | -7.2 | -7   | -8.1 | -6.8 | -7.6 | -7.3 | -7.5 | -7.7 | 1.02 |
| ZINC13563047   | -7.2 | -4.4 | -4.4 | -3.8 | -6   | -6.2 | -6.3 | -4.3 | -7.4 | -4.3 | -7.8 | -4.2 | -5.8 | -5.1 | -6.7 | -4.6 | -5.8 | -6.3 | -7.7 | -6.8 | -3.2 | -6.9 | -6.5 | -6.2 | -7   | -7.4 | -7.1 | -7.6 | -7.7 | -7.8 | 1.39 |
| ZINC13591952   | -8   | -5.6 | -4.1 | -5.1 | -7.7 | -7.9 | -7.2 | -3.7 | -8.5 | -3.4 | -7.7 | -2.5 | -7.5 | -1.9 | -7.6 | -4.2 | -7.1 | -6.7 | -8   | -7.6 | -4.9 | -6.6 | -6.4 | -5.5 | -8.3 | -7.6 | -7.9 | -7.8 | -7.9 | -8.1 | 1.88 |
| ZINC13635778   | -7.6 | -5.5 | -4.7 | -4.8 | -7   | -6.6 | -6.2 | -5.4 | -5.8 | -4.5 | -5.9 | -5.1 | -5.7 | -6   | -6.1 | -5.5 | -5.6 | -6.5 | -6.1 | -6.6 | -1.7 | -5.7 | -6.7 | -5.2 | -7.4 | -6.9 | -7.6 | -6.9 | -7.5 | -7.4 | 1.19 |
| ZINC13639641   | -7.5 | -3.8 | -1.1 | -1.5 | -6.6 | -6.3 | -6.1 | 0.9  | 8    | -2.7 | -6.5 | 1.3  | -5.5 | 1.9  | -6.4 | -0.1 | -5.7 | -7.2 | -7   | -7.6 | -6.1 | -6.4 | -6.6 | -6.6 | -5.2 | -7.1 | -7.2 | -7.6 | -7.4 | -7.7 | 2.99 |
| ZINC13667490   | -8   | -4.7 | -2.6 | -3.4 | -7.6 | -7.2 | -6.2 | -0.8 | -8.5 | -2.3 | -6.8 | -4.8 | -6.1 | 0.3  | -7.2 | -1.6 | -5.8 | -6.4 | -7.7 | -7.8 | -4.9 | -4.1 | -6.6 | -6.1 | -8.1 | -7.7 | -7.8 | -7.8 | -7.9 | -7.9 | 2.41 |
| ZINC13695998   | -7.5 | -4.6 | -3.3 | -0.8 | -7.3 | -6.9 | -6.1 | -2.3 | -8.1 | -2.7 | -6.7 | -4.7 | -6.7 | -4.4 | -6.4 | -0.4 | -6.3 | -6.9 | -6.8 | -7.2 | -5   | -6.7 | -7.9 | -6.3 | -7.4 | -7.2 | -7.7 | -7.6 | -7.3 | -7.8 | 2.18 |
| ZINC13696028   | -7.7 | -5.2 | -2.8 | -3.7 | -7.7 | -7   | -6.3 | 0.8  | -8.5 | -0.9 | -6.8 | -4.9 | -7.5 | 3.2  | -6.4 | -1.3 | -5.4 | -7.6 | -7.2 | -7.4 | -5   | -5.3 | -7.1 | -5.7 | -7.4 | -7.7 | -7.3 | -8.1 | -7.7 | -8.1 | 2.85 |
| ZINC13973054   | -7.9 | -6.6 | -3.9 | -4.8 | -7.6 | -6.6 | -6.6 | -3.6 | -8.1 | -3.8 | -7.6 | -4.9 | -7.2 | -3.9 | -6.7 | -3.8 | -6.7 | -6.8 | -7.5 | -7   | -4.8 | -6.4 | -6.6 | -6.3 | -7   | -7.2 | -7.1 | -7.8 | -7.6 | -7.8 | 1.42 |
| ZINC14075041   | -7.8 | -4.3 | -3.1 | -2.8 | -6.7 | -6.2 | -5.4 | -3.9 | -7.2 | -5.9 | -6.4 | -4.1 | -6.2 | -4.7 | -6.4 | -2.8 | -5.7 | -6.3 | -7.3 | -6.5 | -4.6 | -6.3 | -7.1 | -6.3 | -7.4 | -7.3 | -7.5 | -7.6 | -7.8 | -7.8 | 1.53 |
| ZINC14134934   | -7.7 | -5.5 | -5.4 | -5.2 | -6.5 | -6.7 | -5.5 | -5.3 | -8.1 | -5.1 | -7.1 | -5.2 | -6   | -6.4 | -6.8 | -5   | -6   | -6.4 | -7   | -7   | -4.2 | -6.4 | -6.9 | -6.3 | -7.8 | -6.9 | -7.7 | -7.7 | -7.4 | -7.9 | 1.03 |
| ZINC14137725   | -7.5 | -4.7 | -4.5 | -4.7 | -7.2 | -6.7 | -5.7 | -5.2 | -7.1 | -5   | -5.8 | -4.2 | -5.6 | -4.9 | -5.9 | -5.4 | -5.3 | -6.5 | -6.9 | -6   | -4.7 | -6.7 | -6   | -6.1 | -6.8 | -7   | -6.8 | -7.5 | -7.2 | -7.7 | 1.02 |
| ZINC14143027   | -7.5 | -3.2 | -2   | -1   | -6.9 | -4   | -6.1 | -2.6 | -7.2 | -4.4 | -7.4 | -4.8 | -6.3 | -2.8 | -6.9 | -3.2 | -5.7 | -5.1 | -7.2 | -6.9 | -2.9 | -5.4 | -6.2 | -5.6 | -7.1 | -7   | -7   | -7.1 | -7.3 | -7.3 | 1.92 |
| ZINC14164677   | -7.2 | -5.7 | -3.6 | -3.1 | -7   | -6.5 | -5.9 | -4   | -8.1 | -3.4 | -7.1 | -2.7 | -6   | -4.2 | -5.7 | -2.9 | -6.6 | -6.3 | -6.6 | -6.7 | -2.2 | -6.5 | -6.4 | -6.3 | -7.2 | -7.1 | -7.5 | -7.4 | -7.4 | -7.6 | 1.70 |
| ZINC14168212   | -8   | -5.1 | -5.5 | -5.3 | -7.3 | -7.5 | -4.9 | -5.3 | -6.8 | -5.1 | -7.2 | -3.6 | -5.3 | -6   | -5.3 | -5.4 | -7   | -7.7 | -6.7 | 1.1  | -7.2 | -7.3 | -7.1 | -7.1 | -7.4 | -7.5 | -8.1 | -7.5 | -8.3 | -7.8 | 1.82 |
| ZINC14168823   | -7.8 | -5.5 | -4.3 | -3.3 | -7.6 | -7.1 | -6.8 | -4.6 | -7.8 | -4.1 | -7.8 | -4.7 | -6.6 | -5.2 | -7.2 | -0.7 | -6.3 | -6.8 | -7.6 | -6.6 | -3.8 | -6.8 | -7.1 | -5.9 | -7.8 | -7.1 | -7   | -7.7 | -7.4 | -7.9 | 1.71 |
| ZINC14180164   | -7.5 | -5.3 | -5.5 | -5.6 | -6.7 | -6.7 | -6.4 | -5.5 | -7.7 | -5.2 | -6.5 | -5   | -7   | -5.7 | -6.5 | -4.7 | -5.7 | -6.2 | -6.9 | -6.5 | -6.1 | -6.8 | -6.8 | -6.2 | -7.1 | -6.9 | -7.4 | -7.6 | -7.3 | -7.7 | 0.88 |
| ZINC14185057   | -7.6 | -5.9 | -5.6 | -5.7 | -7.3 | -6.7 | -6.6 | -6.2 | -8.3 | -5.5 | -6.8 | -5.6 | -6   | -6.6 | -5.4 | -5.5 | -6.3 | -6.5 | -6.6 | -6.3 | -1.8 | -7.3 | -6.9 | -6.9 | -7.1 | -7.1 | -7.6 | -7.4 | -7.5 | -7.5 | 1.16 |
| ZINC14480522   | -7.6 | -5.5 | -4.4 | -3.8 | -6.9 | -5.3 | -6.2 | -4   | -6.1 | -5.2 | -6.1 | -1.7 | -5.6 | -4.3 | -5.8 | -3.9 | -5   | -6.7 | -6.3 | -6.6 | -2.5 | -5.5 | -7   | -5.6 | -7.4 | -6.8 | -7.6 | -7   | -7.5 | -7.4 | 1.50 |
| ZINC14516919   | -8.5 | -4.5 | -3.6 | -1.5 | -7.7 | -7.1 | -6.1 | -4.1 | -7.8 | -1.6 | -6.9 | -2.9 | -5.5 | -3.2 | -7.1 | 0.3  | -6.7 | -6.6 | -6.4 | -6.8 | -5.3 | -6.9 | -6.8 | -6.1 | -8.6 | -6.9 | -8.1 | -7.7 | -7.7 | -8.4 | 2.28 |
| ZINC14517441   | -7.6 | -5.2 | -2.1 | 0.5  | -6.7 | -5.7 | -6.2 | -1.7 | -8.6 | -2.5 | -6.3 | -0.7 | -6.3 | 0.2  | -4.6 | -0.6 | -5.8 | -6.3 | -6.6 | -7.4 | -4.6 | -6.4 | -7.7 | -7.2 | -6.6 | -6.7 | -7.2 | -7.4 | -7.1 | 2.59 |      |
| ZINC14549590   | -7.7 | -5.6 | -5.5 | -5.1 | -7.2 | -6.7 | -5.8 | -5.7 | -6.1 | -5.9 | -5.9 | -5.1 | -5.8 | -6   | -6.1 | -5.8 | -5.2 | -6.5 | -6.3 | -6.8 | -2.3 | -6.8 | -6.9 | -6.6 | -7.5 | -6.9 | -7.6 | -7   | -7.5 | -7.6 | 1.08 |
| ZINC14550734   | -7.6 | -5.2 | -4.3 | -3.4 | -7.5 | -7.1 | -6   | -4.9 | -6   | -4.1 | -6.2 | -3.4 | -5.4 | -5.2 | -6.4 | -3.8 | -5.3 | -7.2 | -6.8 | -7   | 0.1  | -5.7 | -7.1 | -6   | -7.8 | -7.1 | -7.8 | -7.1 | -7.6 | -7.6 | 1.76 |
| ZINC14714766   | -7.2 | -5.8 | -4.9 | -4.4 | -7.4 | -7.3 | -6.2 | -5.4 | -7.4 | -4.1 | -7.1 | -4.7 | -6.6 | -5.5 | -6.4 | -5   | -6.9 | -6.7 | -7.2 | -6.9 | -4.4 | -6.6 | -6.6 | -6.3 | -7.2 | -7.4 | -6.7 | -7.7 | -7.5 | -7.8 | 1.09 |
| ZINC14841857   | -7.7 | -3.9 | -3.5 | -2.7 | -7.2 | -7.1 | -7   | -0.6 | -9.2 | 0.1  | -7.2 | -1.5 | -7.1 | 0.5  | -6.6 | -1.4 | -5.8 | -7   | -7.3 | -7.3 | -3.7 | -5.1 | -6.9 | -5.7 | -7.2 | -7.3 | -7.2 | -8   | -7.6 | -8   | 2.70 |
| ZINC15065717   | -7.6 | -6.2 | -5.3 | -5.7 | -7.4 | -7.1 | -6.9 | -6.4 | -8.3 | -5.3 | -7.6 | -5.4 | -7   | -6   | -6.9 | -4.9 | -6.7 | -6.3 | -7   | -6.9 | -2.9 | -7   | -6.9 | -7   | -7.6 | -6.9 | -7.5 | -7.3 | -7.3 | -7.5 | 1.07 |
| ZINC15132713   | -7.7 | -2.5 | -2.6 | -1.6 | -6.7 | -6.1 | -6.3 | -2.8 | -8.2 | -2.2 | -6.7 | -2.9 | -5.1 | -3.9 | -6   | -0.1 | -5.7 | -5.8 | -6.9 | -6.3 | -4.7 | -6.1 | -6.4 | -6.2 | -7.1 | -7.2 | -7.6 | -7.5 | -7.7 | -7.8 | 2.16 |
| ZINC15132713_2 | -7.7 | -5.6 | -2.1 | -1.2 | -6.2 | -6.2 | -4.9 | -2.1 | -8.2 | -3.3 | -6.5 | -2.9 | -5   | -4.4 | -5.8 | -0.3 | -6.1 | -6   | -6.9 | -6.4 | -4.8 | -6.1 | -6.3 | -6.4 | -7.1 | -7.3 | -7.6 | -7.5 | -7.7 | -7.8 | 2.09 |
| ZINC15302638   | -7.7 | -5   | -5.3 | -3.5 | -6.9 | -6.2 | -6   | -4.9 | -7.7 | -5.1 | -6.9 | -1.1 | -5.9 | -5.3 | -7.1 | -2.7 | -6.5 | -5.9 | -6.8 | -6.8 | -4.7 | -6.1 | -7.4 | -6.1 | -8   | -7   | -7.8 | -7.5 | -7.3 | -8   | 1.61 |
| ZINC15386627   | -7.9 | -4.5 | -5.8 | -4.8 | -7.5 | -7.2 | -5.9 | -3.4 | -8.4 | -5.5 | -7.9 | -6.1 | -6.1 | -5.1 | -7.2 | -1.1 | -5.8 | -7.2 | -7   | -7.3 | -5.4 | -7.1 | -6.6 | -5.8 | -7.9 | -7.5 | -7.9 | -7.7 | -7.6 | -8   | 1.59 |
| ZINC15587507   | -7.5 | -5.7 | -4.7 | -4.1 | -7.4 | -7.4 | -6.6 | -4.8 | -8   | -4.1 | -7.2 | -5.6 | -6.5 | -5.7 | -7.3 | -3.6 | -5.6 | -7.1 | -7.5 | -7.1 | -3.5 | -6.3 | -6.4 | -5.9 | -7.8 | -7.2 | -7.6 | -7.6 | -7.4 | -7.5 | 1.34 |
| ZINC15675916_2 | -7.5 | -6.1 | -4.7 | -4.7 | -6.6 | -7.1 | -7.3 | -1.1 | -8.7 | -3.1 | -7.3 | -3   | -7.6 | -1.6 | -7.1 | -2.4 | -6.9 | -6.6 | -7.8 | -7   | -5.3 | -6.9 | -7   | -5.6 | -7.9 | -7.3 | -7.4 | -7.4 | -7.4 | -7.6 | 2.02 |
| ZINC15731940   | -7.2 | -5.9 | -5.7 | -5.1 | -6.2 | -5.6 | -5.8 | -5.7 | -7.7 | -5   | -7   | -5   | -6   | -5.7 | -6.8 | -5.2 | -6.1 | -6.1 | -7.3 | -6.2 | -5.3 | -6.4 | -7.1 | -6.3 | -7.4 | -6.6 | -7   | -7.5 | -7   | -7.9 | 0.84 |
| ZINC15780400   | -7.7 | -4   | -3.3 | -3.3 | -6   | -6   | -4.6 | -3.7 | -6.9 | -3.4 | -7.3 | -1.2 | -4.5 | -4.3 | -5.7 | -2.9 | -4.8 | -6.7 | -6.7 | -6.4 | -4.3 | -5.8 | -7.3 | -6.4 | -7   | -7.5 | -7.3 | -8   | -8   | -7.6 | 1.80 |
| ZINC15823848   | -7.1 | -5.6 | -4.6 | -3.7 | -7.1 | -6.6 | -7.3 | -2.8 | -9.3 | -3.3 | -6.6 | -1.5 | -7.4 | 0.4  | -7.2 | -2.6 | -5.9 | -6.9 | -7.7 | -6.8 | -0.4 | -4.7 | -6.8 | -4.3 | -7.2 | -7.1 | -7.1 | -7.6 | -7.2 | -7.7 | 2.39 |
| ZINC15832163   | -7.5 | -5.5 | -4.6 | -4.9 | -7.2 | -6.5 | -6.6 | -5.3 | -8.2 | -5.6 | -7.3 | -4.9 | -5.9 | -5.6 | -7   | -5   | -6.1 | -6.2 | -6.7 | -5.8 | -5.1 | -6.8 | -6.8 | -6.6 | -7.5 | -6.7 | -6.8 | -7.6 | -7.1 | -7.7 | 0.97 |
| ZINC16079061   | -6   | -4.7 | -1.2 | -2.4 | -7   | -6.7 | -6.2 | -3.2 | -7.2 | -3.3 | -5.8 | 1.7  | -4.9 | -0.5 | -5.4 | -2.8 | -4.3 | -5.6 | -5.9 | -5.7 | -5   | -5.6 | -7.1 | -5.5 | -8   | -7.1 | -7.5 | -7.4 | -7.4 | -7.7 | 2.98 |
| ZINC16085106_1 | -6.3 | -4.8 | -2.8 | -1.5 | -6.9 | -6.7 | -5.3 | -2.1 | -7.6 | -0.2 | -6.3 | -1.4 | -6   | -0.6 | -6.2 | -1.6 | -6.1 | -6   | -7   | -6.4 | -4   | -6   | -5.6 | -5.5 | -6.6 | -6.5 | -6.8 | -7.4 | -7.3 | -7.7 | 1.32 |
| ZINC16094038_1 | -7.6 | -4.9 | -4.3 | -5   | -6.4 | -6   | -6.5 | -4.3 | -8.3 | -4.8 | -6   | -5.1 | -5.6 | -5.9 | -6.5 | -5   | -6   | -5.7 | -6.3 | -5.4 | -3.8 | -6.6 | -6.5 | -6.8 | -7.9 | -7.3 | -8   | -8.1 | -7.8 | -8.1 | 1.27 |
| ZINC16270794   | -7.5 | -4.5 | -3.8 | -0.4 | -7.9 | -7.4 | -6.5 | -2.8 | -8.3 | -0.6 | -8   | -5.4 | -5.8 | -4.2 | -6.9 | -0.6 | -5.8 | -7.2 | -7.2 | -7.2 | -4.8 | -5.3 | -6.8 | -6.2 | -7   | -7.6 | -7.4 | -7.5 | -7.5 | -7.5 | 2.25 |
| ZINC16094880   | -7.6 | -3.7 | -4   | -2.1 | -6.3 | -5.8 | -5.3 | -3   |      |      |      |      |      |      |      |      |      |      |      |      |      |      |      |      |      |      |      |      |      |      |      |

|                |      |      |      |      |      |      |      |        |      |      |      |      |      |      |      |      |      |      |      |      |      |      |      |      |      |      |      |      |      |       |      |
|----------------|------|------|------|------|------|------|------|--------|------|------|------|------|------|------|------|------|------|------|------|------|------|------|------|------|------|------|------|------|------|-------|------|
| ZINC24015858   | -7.5 | -5.1 | -5.4 | -4.8 | -6.5 | -5.8 | -6.4 | -5.5   | -7.7 | -5.8 | -6.8 | -5.7 | -6.1 | -6   | -6.8 | -5.2 | -5.1 | -6.1 | -6.6 | -6.6 | -3.7 | -6.3 | -7   | -6.5 | -7.3 | -7   | -7.2 | -7.5 | -7.2 | -7.7  | 0.96 |
| ZINC24229026   | -7.5 | -5.8 | -3.8 | -3   | -7   | -6.7 | -6.7 | -4.6   | -8.1 | -2.7 | -6.6 | -5   | -7.3 | -3.6 | -6.7 | -2.9 | -5.7 | -6.4 | -6.6 | -6.8 | -4.2 | -6.8 | -7.3 | -7   | -7   | -6.9 | -7.3 | -7.2 | -7.3 | -7.3  | 1.56 |
| ZINC24696159   | -7.5 | -5.5 | -5.8 | -5.2 | -6.8 | -6.5 | -5.9 | -5.4   | -7.7 | -5.9 | -6.7 | -5.1 | -6.4 | -5.8 | -6.8 | -5   | -6.1 | -6.5 | -6.7 | -6.8 | -4.5 | -6.8 | -7.4 | -6.6 | -7.4 | -6.8 | -7.1 | -7.3 | -7.1 | -7.8  | 0.86 |
| ZINC24746479   | -7.5 | -4.9 | -2.8 | -2.7 | -7.2 | -6.7 | -6   | -0.3   | -7.5 | -2.1 | -7.1 | -3.7 | -6.2 | 1    | -6   | -1.2 | -5.1 | -6.7 | -7.6 | -6.9 | -4.3 | -6.1 | -7.2 | -4.7 | -7.7 | -7.4 | -7.1 | -7.5 | -7.5 | -7.8  | 2.43 |
| ZINC24788182   | -7.7 | -4.3 | -2   | -2.4 | -7.7 | -7.1 | -6.5 | 0.4    | -8.4 | -0.4 | -7.9 | -0.2 | -6   | 2.3  | -7.6 | -0.8 | -5.4 | -7   | -7.7 | -7.5 | -4.3 | -3.6 | -7.1 | -5.1 | -7.6 | -7.4 | -7.5 | -7.4 | -7.6 | -7.7  | 3.05 |
| ZINC24799905   | -7.7 | -4.2 | -5.3 | -2.1 | -7.5 | -7.2 | -6   | -4.4   | -8.3 | -3.6 | -6.7 | -2.1 | -4.6 | -4.7 | -6.8 | -3   | -5.6 | -6.6 | -6.6 | -6.7 | -5.1 | -6.4 | -7.6 | -6.7 | -7.2 | -7.3 | -6.8 | -7.5 | -7.4 | -6.8  | 1.68 |
| ZINC24892203   | -7.5 | -3.8 | -2.5 | 0.5  | -7   | -6.4 | -4.8 | -2.8   | -7.8 | -3.7 | -6.5 | -1.8 | -5.5 | -3.8 | -6.1 | 0.3  | -5.8 | -6.5 | -6.5 | -6.3 | -4.7 | -6   | -6.9 | -6   | -6.8 | -7.4 | -7.6 | -7.6 | -7.4 | -7.6  | 2.19 |
| ZINC24925944   | -7.4 | -3.9 | -3.8 | -3.5 | -6.8 | -7.1 | -5.1 | -3.8   | -7.9 | -4.2 | -6.6 | -5   | -6   | -5.5 | -7.2 | -0.5 | -4.5 | -6.1 | -6.9 | -6.7 | -4.9 | -6.5 | -7.3 | -5.8 | -7.9 | -7.1 | -7.9 | -7.4 | -7.4 | -7.8  | 1.74 |
| ZINC24946337   | -7.5 | -4.7 | -3   | -2.5 | -6   | -6.2 | -5.7 | -3.2   | -7.1 | -3.7 | -6.2 | -3.9 | -5.8 | -3.1 | -6   | -2.2 | -5.6 | -5.8 | -7.8 | -7.2 | -4.1 | -6.5 | -7.3 | -6.2 | -7.8 | -7.1 | -7.6 | -7.4 | -7.4 | -7.5  | 1.73 |
| ZINC25005993   | -7.6 | -5.2 | -5.4 | -4   | -7.1 | -6.9 | -6.2 | -4.8   | -8.3 | -4.8 | -7.4 | -4.9 | -6   | -5.4 | -7.1 | -4.5 | -6   | -6.5 | -7.3 | -7   | -5.3 | -6.1 | -6.7 | -6.7 | -8.3 | -7   | -7.8 | -7.5 | -7.5 | -7.8  | 1.19 |
| ZINC25145427   | -7.5 | -5.1 | -2.8 | -3.6 | -7.3 | -6.8 | -6.5 | -0.7   | -8.4 | -2.5 | -7.1 | -2.9 | -6.8 | 0.6  | -7.2 | -1.3 | -5.5 | -6.9 | -6.7 | -7.5 | -3.8 | -6.7 | -7.1 | -5.2 | -7.9 | -7.3 | -7.4 | -7.5 | -7.4 | -7.6  | 2.40 |
| ZINC25200983   | -7.7 | -3.4 | -2.9 | -2.3 | -6.2 | -6.9 | -6.3 | -2.7   | -8.2 | -3.2 | -7.2 | -1.2 | -7.2 | -3   | -7.1 | -2.4 | -6.2 | -6   | -6.8 | -5.7 | -4.4 | -6.5 | -7.1 | -6.5 | -7.1 | -7.3 | -6.6 | -7.7 | -7.5 | -7.8  | 2.04 |
| ZINC25442235   | -7.5 | -5.6 | -0.7 | -3.7 | -6.1 | -6.3 | -5.7 | -1.8   | -7.1 | -3.3 | -6.7 | -4.5 | -6.1 | -0.5 | -6.4 | -1.1 | -5.5 | -5.7 | -7   | -6.8 | -3.7 | -5.2 | -6.5 | -5.1 | -6.7 | -6.9 | -6.6 | -7.2 | -7.1 | -7.3  | 2.05 |
| ZINC25457641   | -7.7 | -5.9 | -6   | -6   | -6.8 | -5.5 | -4.8 | -6     | -7.9 | -5.2 | -6.3 | -4.8 | -5.5 | -6.1 | -5.6 | -5.3 | -6.2 | -6.6 | -6.3 | -5.5 | -4.4 | -6.6 | -7.3 | -6.9 | -7.3 | -6.3 | -6.4 | -7   | -6.8 | -7.8  | 0.90 |
| ZINC25529444   | -7.5 | -5.8 | -5   | -3.6 | -6.8 | -6.7 | -6.6 | -1.7   | -8   | -0.2 | -6.9 | -4.3 | -7.3 | -0.6 | -7.3 | -0.9 | -6.7 | -6.2 | -7.5 | -6.1 | -3.2 | -5.9 | -7   | -5.8 | -7.9 | -6.3 | -7.1 | -7.4 | -7.1 | -7.7  | 2.27 |
| ZINC26556501   | -7.5 | -5.3 | -4.3 | -4.4 | -6.6 | -5.7 | -7.1 | -5.5   | -8.4 | -5.3 | -6.3 | -3.6 | -4.4 | -6   | -4.8 | -4.5 | -5.9 | -5.5 | -7   | -6.4 | -3.8 | -6.6 | -7.1 | -7   | -7.4 | -7.3 | -7.5 | -7   | -7.5 | -7.4  | 1.29 |
| ZINC26915893   | -7.4 | -5.4 | -5.2 | -5   | -6.2 | -6.3 | -6.5 | -5.4   | -8.1 | -5.8 | -6.8 | -5.3 | -5.6 | -6.2 | -6.8 | -5.5 | -6.8 | -6.7 | -5.9 | -7.1 | -4   | -7   | -6.5 | -6.8 | -7.4 | -6.6 | -7.2 | -7   | -6.9 | -7.1  | 0.89 |
| ZINC26939367   | -7.7 | -5.7 | -4.8 | -4.5 | -6.4 | -6.5 | -6   | -4.9   | -8   | -6   | -6.7 | -4.1 | -5.6 | -5.8 | -4.9 | -4   | -5.2 | -6.6 | -6.2 | -5.2 | -5.7 | -7   | -6.7 | -6.3 | -7.7 | -7.3 | -7.8 | -7.6 | -7.6 | -7.7  | 1.17 |
| ZINC27228121   | -7.6 | -5.4 | -5.8 | -4.8 | -6.8 | -6.4 | -5.8 | -5.5   | -7.7 | -5.6 | -6.4 | -5.4 | -6.3 | -5.6 | -6.8 | -4.8 | -6.1 | -6.3 | -6.8 | -6.6 | -5   | -7   | -6.7 | -6.2 | -7.1 | -6.7 | -7.6 | -7.3 | -6.9 | -7.7  | 0.85 |
| ZINC27248079   | -6.8 | -4.8 | -1.8 | -2.6 | -7.9 | -6.6 | -6.4 | -0.2   | -8.5 | -1.8 | -8.2 | -3.6 | -6.4 | 2.6  | -7.5 | -1.3 | -5.8 | -7.5 | -7.8 | -7.5 | -4.7 | -4.6 | -7   | -8.2 | -7.7 | -8.1 | -7.7 | -8   | -8.1 | -2.85 | 2.85 |
| ZINC27653258   | -7.6 | -6.1 | -4.4 | -4.8 | -6.3 | -6.8 | -6.9 | -3     | -7.4 | -3.3 | -6.8 | -4   | -6.2 | -4.5 | -6.4 | -3.4 | -5.8 | -6.2 | -7.1 | -6.4 | -2.2 | -6   | -7.1 | -6.3 | -7.6 | -6.9 | -7.2 | -7.7 | -7.4 | -7.9  | 1.56 |
| ZINC28176133   | -7.7 | -4   | -3.4 | -3   | -7.1 | -5.9 | -4.7 | -3.4   | -6.5 | -2.7 | -7   | 2.1  | -5.6 | -4.4 | -6.1 | -1.2 | -6   | -5.5 | -6.6 | -5.5 | -1.4 | -5.6 | -6.4 | -5.7 | -7.4 | -7   | -7.8 | -7.4 | -7.5 | -7.5  | 2.31 |
| ZINC28197055   | -7.5 | -4.9 | -1.8 | -3.1 | -7.6 | -6.7 | -6.1 | -1.6   | -8.3 | -2.8 | -6.8 | -4.7 | -6.5 | -2.8 | -6.7 | -2.2 | -5.2 | -7.2 | -7.4 | -7   | -4.3 | -4.8 | -6.5 | -5.6 | -7.5 | -7.1 | -7.2 | -7.5 | -7.5 | -7.6  | 1.99 |
| ZINC28304642   | -7.6 | -6.6 | -5.1 | -4.8 | -6.9 | -6.1 | -5.6 | -5     | -8   | -6.1 | -7.2 | -4.1 | -6.9 | -5.4 | -7.1 | -5   | -6.5 | -6.4 | -7.5 | -5.9 | -2.6 | -6.6 | -6.6 | -6.5 | -7.2 | -7.1 | -6.7 | -7.8 | -7.4 | -7.6  | 1.21 |
| ZINC28503234   | -7.6 | -4.9 | -2.9 | -2.7 | -5.9 | -6.9 | -6.1 | -3.5   | -7.6 | -4.5 | -6   | 0.4  | -5.1 | -5.3 | -6.9 | -2   | -5.5 | -6.9 | -6.3 | -7.2 | -4.3 | -6.9 | -7.3 | -6.2 | -7.9 | -7   | -7.7 | -7.5 | -7.5 | -8    | 2.02 |
| ZINC2879747    | -7.4 | -6   | -3.6 | -4   | -7.4 | -6.9 | -6.9 | -2.8   | -8.5 | -3.2 | -7.8 | -5.6 | -6.3 | -0.9 | -7.3 | -3.1 | -6.9 | -6.9 | -7.5 | -6.8 | -4.3 | -5.4 | -6.8 | -5.8 | -8.2 | -7.7 | -7.3 | -7.8 | -7.4 | -7.7  | 1.90 |
| ZINC2879747_1  | -6.9 | -5.9 | -3.8 | -2.2 | -7.2 | -6.9 | -6.8 | -2.5   | -8.9 | -2.6 | -7.4 | -5   | -6.7 | -0.8 | -7.4 | -3.2 | -6.8 | -6.4 | -7.5 | -6.5 | -3.5 | -6.3 | -6.7 | -5.3 | -7.8 | -7.5 | -8   | -8.2 | -8   | -8.1  | 2.11 |
| ZINC28798913_2 | -7.4 | -5.3 | -2.7 | -3   | -7.3 | -6.4 | -6.5 | -1.9   | -8.9 | -2.3 | -7.8 | 1.1  | -7.4 | -0.2 | -6.4 | -2.3 | -6.5 | -6.3 | -7.6 | -6.6 | -3.4 | -4.3 | -7.2 | 4    | -7.1 | -7.2 | -7.1 | -7.7 | -7.3 | -7.6  | 2.55 |
| ZINC28856539_1 | -7.6 | -6   | -4   | -2.6 | -6.9 | -6.6 | -6.8 | -2.4   | -8.3 | -3.3 | -7.3 | -4.6 | -7.8 | -0.8 | -7.2 | -3   | -7   | -6.4 | -7.3 | -7   | -4   | -6.6 | -6.7 | -5.5 | -7.4 | -7.3 | -7.3 | -7.6 | -7.2 | -7.8  | 1.96 |
| ZINC29061650   | -7.7 | -4.7 | -4.1 | -3.7 | -7   | -6.6 | -5.3 | -4.7   | -6.7 | -4.2 | -6.4 | -3.3 | -5.2 | -5.5 | -5.9 | -3.2 | -5   | -6   | -6.7 | -6.6 | -5.4 | -6.4 | -6.7 | -6.4 | -7   | -7.4 | -7   | -7.5 | -7.6 | -7.6  | 1.33 |
| ZINC29686514   | -7.7 | -5.5 | -5.5 | -4.7 | -6.3 | -5.9 | -6   | -5.7   | -8.1 | -5.7 | -6.4 | -5.5 | -5.2 | -6.2 | -6.1 | -5.3 | -6   | -6.5 | -6.8 | -6.8 | -4.5 | -6.4 | -7.1 | -6.3 | -7.3 | -7.2 | -7.2 | -7.5 | -7.3 | -7.7  | 0.92 |
| ZINC29687041   | -8   | -5.5 | -5.8 | -4.5 | -6.2 | -5.5 | -6   | -5.5   | -7.8 | -6.1 | -7   | -5.1 | -5.8 | -6.3 | -5.7 | -5.1 | -5.8 | -6.2 | -6.8 | -6.7 | -1.2 | -6.4 | -6.8 | -6.5 | -7.7 | -7.5 | -7.7 | -7.8 | -7.7 | -8    | 1.37 |
| ZINC29855142   | -7.4 | -6.4 | -4.5 | -3.7 | -7.4 | -7.1 | -7.5 | -2.6   | -9.5 | -2.3 | -8.2 | 1.2  | -7.6 | -1.8 | -7.6 | -2.9 | -6.2 | -6.8 | -8.1 | -7.5 | -2.1 | -5.8 | -6.9 | -5.7 | -7.9 | -7.5 | -7.4 | -8.1 | -7.5 | -8    | 2.52 |
| ZINC30057929   | -7.4 | -6   | -4.8 | -4.9 | -7.4 | -6.4 | -7.4 | -2.8   | -9   | -3.1 | -7.8 | -1.5 | -7.5 | -2.1 | -6.9 | -3.6 | -6.2 | -6.6 | -7.6 | -6.9 | -4   | -3.3 | -6.4 | -5.3 | -7.7 | -7.2 | -7.3 | -7.7 | -7   | -7.7  | 1.97 |
| ZINC30600026_1 | -7.5 | -5   | -2.8 | -2.2 | -7.2 | -6.8 | -5.6 | 0.9    | -7.3 | -2.4 | -6.9 | -0.4 | -5.8 | -1.6 | -6.1 | -2.4 | -5.8 | -6   | -7.3 | -7.2 | -3   | -4.6 | -6.7 | -6.1 | -7.7 | -7.2 | -7.6 | -7.5 | -7.2 | -7.7  | 2.30 |
| ZINC31371161   | -7.6 | -5.7 | -5.2 | -4.9 | -7.3 | -6.8 | -5.6 | -5.1   | -7.5 | -4.8 | -6.8 | -4.4 | -6.1 | -6.2 | -6.2 | -5   | -6.2 | -6.1 | -6.7 | -6.8 | -5.1 | -6.6 | -7.2 | -6.4 | -6.9 | -7.2 | -7.6 | -7.6 | -7.5 | -7.3  | 0.97 |
| ZINC31781659   | -7.8 | -5.1 | -5.4 | -4.8 | -6.5 | -6.4 | -5.8 | -5.2   | -7.7 | -5   | -6.8 | -5.1 | -6.2 | -6.1 | -6.3 | -5.2 | -6.1 | -6.5 | -7.1 | -6.5 | -3.4 | -6.7 | -6.8 | -6.3 | -7.6 | -7.3 | -7.6 | -7.7 | -7.6 | -7.9  | 1.10 |
| ZINC31928062   | -7.2 | -4   | -4.7 | -2.4 | -6.5 | -6.4 | -6.4 | -4.1   | -7.7 | -4.9 | -6.5 | -4.8 | -6.5 | -4.9 | -6.8 | 1    | -4.5 | -6.3 | -6.6 | -5.8 | -3.7 | -5.5 | -7   | -6   | -7.4 | -6.7 | -7.2 | -6.9 | -7   | -7.3  | 1.81 |
| ZINC32026049   | -7.4 | -4.3 | -2.8 | -1.3 | -6.3 | -6.1 | -5.2 | -4.2   | -7.6 | -0.9 | -6.3 | -1.3 | -5.6 | -3.6 | -5.9 | -2   | -5.7 | -6.7 | -6.2 | -6.1 | -3.9 | -5.9 | -6.9 | -5.8 | -7.6 | -6.9 | -7.4 | -7.3 | -7.3 | -7.6  | 2.04 |
| ZINC32044867   | -7.5 | -5   | -4.9 | -4.8 | -5.5 | -6   | -6.3 | -5.2   | -7.8 | -5   | -6.4 | -5   | -5.8 | -5.8 | -6   | -4   | -5.8 | -6.6 | -6.5 | -6.1 | -4.3 | -7   | -7.5 | -6.9 | -7   | -6.7 | -7   | -7.3 | -7.3 | -7    | 1.02 |
| ZINC32080189   | -7.5 | -4.7 | -3.2 | -3.6 | -7.8 | -7.8 | -6.2 | -2.3   | -8.4 | 2.1  | -8.7 | -5.2 | -6.1 | -1.2 | -6.1 | -2.4 | -5.7 | -7.5 | -7.5 | -7.4 | -4.6 | -6.4 | -7.1 | -5.9 | -7.2 | -7.3 | -7.6 | -7.5 | -7.3 | -7.7  | 2.46 |
| ZINC32366275   | -7.7 | -5.3 | -3.5 | -1.9 | -5.9 | -6.6 | -5.6 | -4.5   | -7.9 | -3.7 | -5.8 | -1.3 | -6.1 | -4.7 | -5.2 | -4.1 | -5.2 | -6   | -6.2 | -6   | -2.8 | -6.4 | -7.8 | -6.1 | -7   | -7.1 | -7.9 | -7.8 | -7.6 | -8    | 1.80 |
| ZINC32476115_1 | -7.7 | -6.2 | -4.3 | -4.7 | -7.5 | -6.6 | -7.3 | -3.1   | -9.8 | -3.9 | -7.4 | -0.5 | -6.6 | -1.6 | -7.1 | -2.9 | -6.3 | -6.5 | -7.7 | -7   | -2.9 | -5.9 | -6.9 | -5.7 | -8.1 | -7.1 | -7.3 | -7.7 | -7.2 | -7.9  | 2.13 |
| ZINC32513766   | -7.6 | -5.4 | -5.8 | -5.6 | -7.5 | -7   | -5.6 | -6.4   | -6.1 | -5.3 | -6.8 | -4   | -6   | -6.3 | -6.7 | -5.5 | -5.9 | -6.8 | -7.6 | -7.4 | -3.9 | -5.5 | -6.8 | -6   | -6.7 | -7.4 | -7.1 | -7.4 | -7.6 | -7.6  | 1.01 |
| ZINC32609622   | -7.2 | -4.9 | -1.8 | -3.9 | -6.9 | -6.2 | -5.7 | -0.7   | -7.4 | 2.1  | -7.1 | 0.7  | -6.7 | -1.1 | -7.2 | -1.7 | -6.6 | -6.2 | -7.4 | -6.2 | -5.1 | -5.8 | -6.7 | -5.6 | -7.2 | -7.3 | -7.4 | -7.7 | -6.8 | -7.9  | 2.73 |
| ZINC32702480   | -7.5 | -6.3 | -3.8 | -4.2 | -6.9 | -6.6 | -6.8 | -4.7   | -7.8 | -4.4 | -7.2 | -0.7 | -6.9 | -5.4 | -6.9 | -4.4 | -6.3 | -6.1 | -7.5 | -6.6 | -4.2 | -7   | -6.5 | -6.6 | -7.4 | -7   | -7.1 | -7.3 | -7.3 | -7.6  | 1.56 |
| ZINC32721943   | -7.5 | -5   | -2.2 | -2.6 | -7.1 | -6.7 | -6.3 | -2.8   | -8.9 | -2   | -6.5 | -5   | -6.3 | -2.7 | -6.2 | 0    | -5.3 | -6.8 | -7.3 | -7   | -5.4 | -6.4 | -6.9 | -5.7 | -7.6 | -7.1 | -7.3 | -7.7 | -7.4 | -7.4  | 2.12 |
| ZINC32743526   | -7.4 | -5.1 | -5.5 | -5.4 | -6.5 | -6.2 | -5.4 | -5.5</ |      |      |      |      |      |      |      |      |      |      |      |      |      |      |      |      |      |      |      |      |      |       |      |

|                |      |      |      |      |      |      |      |      |      |      |      |      |      |      |      |      |      |      |      |      |      |      |      |      |      |      |      |      |      |      |      |
|----------------|------|------|------|------|------|------|------|------|------|------|------|------|------|------|------|------|------|------|------|------|------|------|------|------|------|------|------|------|------|------|------|
| ZINC38671007   | -7.5 | -5.4 | -4.5 | -3.4 | -6.7 | -6.9 | -6.5 | -3.7 | -7.7 | -2.6 | -7.4 | -1.1 | -6.8 | -3.3 | -6.3 | -3.4 | -6.7 | -6.1 | -7.5 | -6.9 | -5.6 | -6.6 | -6.7 | -6.5 | -7.7 | -7.4 | -7.2 | -7.7 | -7.7 | -7.9 | 1.80 |
| ZINC38690261   | -7.7 | -6   | -4.9 | -4.2 | -7.4 | -7.1 | -6.4 | -4.3 | -8.7 | -5.5 | -7.5 | -3.1 | -6.7 | -5.1 | -7.3 | -3.3 | -7.1 | -7.1 | -7.4 | -7.1 | -4.8 | -7   | -7   | -7   | -7.8 | -7.3 | -7.8 | -7.6 | -7.8 | -8   | 1.46 |
| ZINC38717050   | -7.6 | -5.2 | -4   | -1.8 | -6.8 | -6.5 | -6.1 | -1.9 | -8.8 | -1.6 | -6.4 | -4.2 | -6.6 | -2.4 | -6.7 | -1.6 | -5.5 | -6.4 | -7   | -7.2 | -5.3 | -6.8 | -7.6 | -5.8 | -7.2 | -7.2 | -7.4 | -7.5 | -7.4 | -7.6 | 2.06 |
| ZINC38717050_1 | -7.5 | -5.4 | -3.7 | -3.9 | -6.6 | -6.4 | -6.3 | -0.6 | -8.8 | -4.8 | -6.7 | -4.4 | -7   | -0.7 | -6.7 | -1   | -5.6 | -6.4 | -7   | -7.1 | -5   | -6.6 | -7.6 | -5.5 | -7.3 | -7.1 | -7.2 | -7.5 | -7.3 | -7.5 | 2.08 |
| ZINC38734832   | -7.6 | -4   | 0.5  | 4.3  | -6.6 | -6.3 | -4.5 | 0.5  | -7.5 | -0.1 | -6.6 | 3.8  | -6   | 3.2  | -7   | 0.8  | -6.6 | -6.1 | -6.9 | -6.9 | 2.1  | -6.1 | -6.4 | -5   | -6.9 | -7.2 | -7.2 | -7.7 | -7.4 | -7.9 | 3.98 |
| ZINC38768323   | -7.7 | -3.9 | -3.3 | -1.5 | -7   | -7.1 | -6.3 | -2.2 | -8.1 | -2.5 | -6.8 | -4.8 | -6   | -5.4 | -7   | 0.4  | -4.7 | -6.5 | -7.3 | -7.1 | -4.7 | -6.6 | -7.2 | -5.8 | -7.7 | -7.6 | -8   | -7.5 | -7.6 | -7.8 | 2.60 |
| ZINC38871416   | -7.9 | -6.3 | -5.6 | -3.3 | -7.6 | -7.1 | -6.6 | -3.3 | -7.4 | -3.3 | -7.6 | -4.7 | -7.2 | -4.3 | -7.3 | -3   | -6.6 | -6   | -7.8 | -7.2 | -4   | -6.4 | -6.7 | -6.1 | -7.7 | -7.3 | -7.4 | -7.9 | -7.6 | -7.7 | 1.59 |
| ZINC39034878   | -7.6 | -5.7 | -5.5 | -5.4 | -7   | -6.3 | -5.8 | -6.1 | -7.8 | -6.4 | -6.2 | -6   | -5.9 | -6.8 | -6   | -6   | -5.7 | -6.7 | -7   | -6.6 | -3.5 | -7.2 | -7   | -7   | -7   | -7.1 | -7.4 | -7.5 | -7.5 | -7.4 | 0.89 |
| ZINC39224787   | -7.4 | -5.8 | -5.8 | -5.2 | -7.4 | -6.8 | -5.8 | -5.6 | -7.8 | -6   | -6.8 | -4   | -5.4 | -6.4 | -6.7 | -4.7 | -5.3 | -6.5 | -7.3 | -6.8 | -2.4 | -7.5 | -7.2 | -6.5 | -7.6 | -7.7 | -6.9 | -8   | -7.3 | -7.6 | 1.25 |
| ZINC39372551   | -7.3 | -5.6 | -5.7 | -5.2 | -6.2 | -6.8 | -5.1 | -5.8 | -6.1 | -5.5 | -6   | -4.7 | -4.9 | -6.3 | -5.8 | -5.2 | -5.3 | -6.8 | -6.3 | -6.8 | -4   | -5.7 | -6.8 | -6.4 | -7.2 | -7.5 | -7.4 | -7.4 | -7.7 | -7.7 | 0.97 |
| ZINC39380529   | -7.4 | -5   | -5.3 | -3.1 | -7.1 | -6.7 | -6.5 | -4.5 | -7.5 | -4   | -7.5 | -2.5 | -5.4 | -4.9 | -7.2 | -3.4 | -5.3 | -7.2 | -7.3 | -7.1 | -3.6 | -6.9 | -6.8 | -7.1 | -7.1 | -7.2 | -7.7 | -7.4 | -7.3 | 1.56 |      |
| ZINC39412261   | -7.7 | -4.8 | -4.6 | -4.3 | -7.1 | -6.4 | -5.3 | -4.4 | -8   | -3.3 | -6.9 | -0.8 | -5.9 | -4.2 | -6.5 | -2.4 | -6.1 | -6.5 | -7   | -6.5 | -3.3 | -6.5 | -6.8 | -6.1 | -6.5 | -7.2 | -7   | -7.8 | -7.6 | -7.6 | 1.75 |
| ZINC39580819   | -7.6 | -6.8 | -5.2 | -4.6 | -7.6 | -7.2 | -7.1 | -4   | -7.9 | -2.8 | -8.4 | -1.5 | -6.7 | -4.2 | -8   | -4.2 | -6.5 | -6.4 | -7.9 | -6.3 | -0.8 | -5.8 | -6.8 | -6.6 | -7.8 | -7.2 | -7.6 | -7.5 | -7.4 | -7.6 | 1.96 |
| ZINC39590743   | -7.8 | -5.4 | -4.3 | -4   | -7.5 | -7   | -5.4 | -6.4 | -8.4 | -3.3 | -7.7 | -4.6 | -5.9 | -5.3 | -6.1 | -4.7 | -5.1 | -7   | -8.1 | -6.4 | -3.8 | -7.1 | -6.7 | -6.6 | -7.2 | -8.4 | -7.1 | -8.1 | -7.2 | -7.8 | 1.46 |
| ZINC39699875   | -8.1 | -4.9 | -6   | -5.7 | -7.5 | -6.9 | -4.5 | -5.1 | -8.2 | -6.3 | -7.8 | -4.1 | -5.5 | -6.1 | -6.6 | -5.1 | -6.6 | -6.9 | -7.4 | -6.1 | -3.2 | -7.3 | -6.7 | -7.1 | -7.6 | -7.4 | -8.2 | -7.9 | -7.8 | -8.2 | 1.33 |
| ZINC39868000   | -7.6 | -4.9 | -3.3 | -4.1 | -6.8 | -6.4 | -6.4 | -0.7 | -8.2 | -2   | -6.8 | 1.8  | -6.9 | 0.5  | -6.3 | -1.6 | -5.7 | -6.3 | -7.4 | -6.6 | -2.4 | -4   | -7   | -4.6 | -7.5 | -7.5 | -7.5 | -7.6 | -7.7 | -7.8 | 2.70 |
| ZINC39868001   | -7.7 | -5   | -2.9 | -3.6 | -6.6 | -6.6 | -6.4 | -0.3 | -8.5 | -0.9 | -6.9 | -1.9 | -6.7 | 1.1  | -6.4 | -1.3 | -5.5 | -6   | -7.4 | -7.2 | -3.3 | -4.3 | -7.2 | -5   | -7.7 | -7.1 | -7.1 | -7.5 | -7.5 | -7.8 | 2.71 |
| ZINC39936872   | -7.4 | -5.5 | -5.6 | -5.1 | -6.4 | -5.6 | -5.6 | -5.4 | -7.8 | -5.8 | -7   | -5   | -5.7 | -6   | -5.7 | -4.8 | -5.6 | -5.9 | -6.7 | -6   | -4.1 | -6.1 | -7.1 | -6.4 | -7.2 | -6.9 | -7.1 | -7.4 | -7.2 | -7.6 | 0.93 |
| ZINC39936872_1 | -7.6 | -5   | -5.4 | -4.8 | -5.3 | -5.4 | -5.6 | -5.2 | -7.8 | -5.6 | -7.2 | -5.7 | -5.8 | -5.9 | -5.3 | -4.6 | -5.5 | -5.5 | -6   | -5.3 | -4.3 | -6.4 | -5.9 | -5.3 | -6.9 | -7.2 | -6.9 | -7.7 | -7.4 | -7.6 | 1.01 |
| ZINC39937580   | -7.7 | -5.4 | -5.7 | -5.3 | -6.5 | -5.7 | -6.3 | -5.2 | -7.6 | -5.6 | -6.8 | -5.9 | -5.6 | -6.4 | -6.7 | -5.4 | -6.1 | -7.3 | -6.9 | -7.1 | -5.7 | -6.5 | -6.7 | -6.3 | -7.7 | -7.2 | -7.5 | -7.6 | -7.5 | -7.8 | 0.84 |
| ZINC39964532   | -7.7 | -6.1 | -4.9 | -3.8 | -6.9 | -7.4 | -5.8 | -5.5 | -7.6 | -4.7 | -7.5 | -0.2 | -6.2 | -7.4 | -6.8 | -2.4 | -6.4 | -6.8 | -7.8 | -7.3 | 0.9  | -6.7 | -7.3 | -6.3 | -8.5 | -7.5 | -8   | -7.4 | -7.7 | -7.9 | 2.22 |
| ZINC39973208   | -7.6 | -5.9 | -5.7 | -5.5 | -7.5 | -7.1 | -5.9 | -6   | -6.8 | -5.8 | -6.3 | -4.4 | -5.9 | -5.8 | -6.2 | -5   | -4.7 | -6.5 | -7.1 | -6.7 | -2.9 | -7   | -7.5 | -6.4 | -7   | -7.3 | -6.9 | -7.4 | -7.6 | -7.5 | 1.09 |
| ZINC40456879   | -6.4 | -5.1 | -5.5 | -5.1 | -7.3 | -5.4 | -5.6 | -5.4 | -7.8 | -4.7 | -6.1 | -4.8 | -4.2 | -5.5 | -5.7 | -4.8 | -5.5 | -6.6 | -6.1 | -5   | -2.6 | -7   | -6.8 | -6.7 | -7.2 | -7.1 | -7.4 | -7.5 | -7.3 | -7.7 | 1.21 |
| ZINC40477709   | -7.6 | -5.6 | -4.8 | -4.4 | -7   | -6.8 | -6.5 | -4   | -8.2 | -4.8 | -7.4 | -4.4 | -6.5 | -5.6 | -7.3 | -4.1 | -6.2 | -6.4 | -7.2 | -7.1 | -4.3 | -6.5 | -7   | -6.4 | -7.4 | -7   | -7.7 | -7.3 | -7.3 | -7.6 | 1.24 |
| ZINC40487746   | -7.6 | -5   | -3.5 | -3.3 | -6.6 | -6.4 | -6.1 | -3.8 | -8   | -3   | -6.7 | -4   | -4.5 | -5.1 | -6   | -2.7 | -6.1 | -5.7 | -6.4 | -5.8 | -3.7 | -6   | -6.4 | -5.7 | -7.4 | -7   | -7.6 | -7.3 | -7.4 | -7.7 | 1.55 |
| ZINC40504990   | -8.2 | -4.7 | -3.7 | -4.6 | -6.9 | -6.3 | -6.2 | -3.3 | -7.8 | -3.5 | -6.6 | -5.3 | -4.9 | -4.3 | -6.5 | -1.1 | -6.2 | -6.2 | -6.3 | -6.3 | -5.6 | -6.7 | -7.2 | -6.6 | -7.8 | -7.3 | -8.1 | -7.9 | -7.9 | -8.4 | 1.72 |
| ZINC40773135   | -7.9 | -5.4 | -6.2 | -4.5 | -7.3 | -7   | -5.8 | -4.9 | -7.7 | -5.1 | -7.2 | -5.2 | -6.3 | -4.9 | -7.3 | -2.5 | -6.8 | -6.1 | -7.1 | -7   | -5.7 | -6.6 | -7.1 | -6.5 | -8.1 | -7.4 | -7.5 | -7.7 | -7.2 | -8.1 | 1.27 |
| ZINC40773330   | -7.7 | -5.3 | -4.5 | -4.8 | -7.1 | -6.2 | -6.1 | -3.6 | -8.3 | -4.3 | -7.1 | -3.3 | -6.8 | -4.9 | -6   | -2.6 | -6   | -6.7 | -6.8 | -6.1 | -5.4 | -6.5 | -6.5 | -6.4 | -7   | -6.6 | -7.5 | -7.6 | -6.9 | -7.9 | 1.40 |
| ZINC40773332   | -7.9 | -5.2 | -3   | -2.4 | -7   | -5.7 | -5.7 | -5.1 | -8.2 | -4.9 | -6.2 | -3.1 | -4.9 | -4.8 | -6.4 | -1.9 | -6.1 | -6.1 | -6.9 | -6.4 | -4.5 | -6.6 | -6.6 | -6.6 | -7.4 | -6.9 | -7.7 | -7.9 | -7.2 | -8.1 | 1.68 |
| ZINC40773332_1 | -8   | -4.8 | -4.7 | -3.3 | -6.2 | -5.5 | -6.3 | -4.9 | -8.1 | -2.1 | -6.3 | -2.8 | -5.1 | -5.3 | -5.9 | -1.5 | -6.1 | -5.6 | -6.8 | -5.9 | -3.1 | -6.3 | -6.6 | -6.5 | -7.4 | -6.9 | -7.7 | -7.4 | -7.7 | -7.5 | 1.74 |
| ZINC40803832   | -7.8 | -5.3 | -5.8 | -5.4 | -7.4 | -6.7 | -6   | -5.4 | -7.8 | -5.4 | -7.1 | -5.1 | -5.7 | -6.1 | -7.2 | -4.6 | -5.9 | -6.8 | -7.1 | -6.4 | -4   | -6.8 | -6.8 | -6.7 | -6.9 | -7   | -7   | -7.6 | -7.1 | -7.5 | 0.97 |
| ZINC41055882   | -7.5 | -4.7 | -1.8 | -3.6 | -6.7 | -6.5 | -6.3 | -0.3 | -8.3 | -2.3 | -6.7 | -0.5 | -6.6 | 1    | -6.6 | -1.4 | -4.5 | -6.3 | -7.4 | -6.8 | -3.8 | -5.4 | -7   | -4.9 | -7.8 | -7.2 | -7.4 | -7.2 | -7.4 | -7.5 | 2.57 |
| ZINC4121467    | -7.4 | -5.1 | -5.2 | -4.8 | -6.2 | -5.9 | -5.2 | -5.5 | -7.5 | -4.9 | -6.4 | -5   | -5.3 | -5.8 | -5.7 | -5.1 | -4.9 | -5.6 | -6.8 | -6.6 | -4.6 | -6.2 | -6   | -6.3 | -6.8 | -6.9 | -7.2 | -7.4 | -7   | -7.6 | 0.92 |
| ZINC4121473    | -7.5 | -4.9 | -5.3 | -5   | -6.5 | -5.8 | -6.3 | -5.3 | -7.7 | -5.5 | -6.6 | -5.4 | -5   | -5.9 | -5.2 | -5   | -5.4 | -6   | -6.8 | -6.5 | -4.1 | -6.6 | -6.4 | -6.5 | -6.8 | -7.1 | -7.3 | -7.5 | -7.1 | -7.6 | 0.96 |
| ZINC4121473_1  | -7.5 | -5.1 | -5.3 | -5.2 | -6.5 | -5.9 | -5.2 | -5.3 | -7.7 | -5.2 | -6.8 | -5   | -5.1 | -5.7 | -5.2 | -4.7 | -5.4 | -5.8 | -6.8 | -6.6 | -4.9 | -6.5 | -6.3 | -6.5 | -6.9 | -6.6 | -7.3 | -7.4 | -7.4 | -7.7 | 0.95 |
| ZINC4121476    | -7.8 | -5   | -5.4 | -5   | -5.8 | -5.7 | -5.6 | -5.1 | -7.6 | -5.4 | -6.5 | -5.2 | -5.2 | -5.8 | -5.2 | -5.1 | -5.7 | -6   | -6.6 | -6.5 | -4   | -6.2 | -6.3 | -6.3 | -7.2 | -7.1 | -7.4 | -7.8 | -7.6 | -7.8 | 1.03 |
| ZINC4124697    | -7.5 | -5.5 | -6.2 | -5.7 | -7   | -6.8 | -6.4 | -6   | -7.3 | -5.5 | -7.4 | -5.3 | -6.7 | -5.8 | -6.8 | -5.1 | -6.1 | -6.8 | -7.3 | -6.6 | -2.9 | -6.1 | -6.7 | -6.4 | -7.3 | -7.1 | -7.4 | -7.5 | -7.3 | -7.5 | 0.99 |
| ZINC41421337   | -7.5 | -6   | -5.9 | -5.6 | -7.2 | -7   | -6.7 | -5.8 | -8   | -5.6 | -7.3 | -5.6 | -6.7 | -6.9 | -7.4 | -5.7 | -6.2 | -6.7 | -7   | -6.9 | -5.2 | -6.8 | -6.4 | -6.9 | -7.7 | -7.1 | -7.5 | -7.5 | -7.5 | -7.9 | 0.77 |
| ZINC41761292   | -7.5 | -5.9 | -6   | -5.3 | -6.9 | -6.5 | -5.7 | -6.1 | -7.6 | -6.1 | -6.9 | -5.9 | -6.3 | -7   | -6.4 | -5.4 | -6.4 | -6.4 | -6.7 | -6.5 | -3.7 | -6.4 | -6.7 | -6.7 | -7.4 | -7   | -7.5 | -7.3 | -7.4 | -7.8 | 0.84 |
| ZINC41968410   | -7.8 | -5.5 | -5.3 | -5.3 | -7.2 | -6.8 | -6.7 | -5.4 | -7.8 | -5   | -7.6 | -4.8 | -6.3 | -5.3 | -6.9 | -5.4 | -6.7 | -6   | -7.9 | -7.3 | -1.2 | -6.3 | -6.7 | -6   | -7.7 | -7.5 | -7.3 | -8   | -7.6 | -8   | 1.42 |
| ZINC42026664   | -7.6 | -5.3 | -4.9 | -4.8 | -7.4 | -7.4 | -4.5 | -4.5 | -7.7 | -4.2 | -7.1 | -4.8 | -6.3 | -5.4 | -6.2 | -5.2 | -5.9 | -5.9 | -7.1 | -7.1 | -4   | -6.7 | -8.2 | -5.9 | -7.6 | -7   | -7.4 | -7.7 | -7.2 | -7.5 | 1.25 |
| ZINC42381067   | -7.7 | -5.9 | -5   | -3.9 | -6.8 | -6.8 | -6.2 | -3.9 | -7.8 | -3.8 | -7.4 | -3.4 | -6.6 | -4   | -6.5 | -3.7 | -6.3 | -6   | -7.7 | -6.9 | -4.5 | -6.5 | -6.8 | -7   | -7.6 | -7.5 | -7.2 | -7.9 | -7.7 | -7.9 | 1.48 |
| ZINC42756523_1 | -7.6 | -5.8 | -3.4 | -4.4 | -6.9 | -6.4 | -6.5 | -3   | -8.3 | -4.6 | -7.1 | -2.5 | -6.9 | -5.2 | -7.3 | -3.6 | -6.7 | -6.4 | -7.2 | -7.3 | -5   | -6.5 | -5.9 | -6.9 | -6.8 | -7.5 | -6.8 | -7.6 | -7.1 | -7.1 | 1.50 |
| ZINC42756547_2 | -8.3 | -5.4 | -2.9 | -4.3 | -6.9 | -7.3 | -6.6 | -1.9 | -8.2 | -2.7 | -7.3 | -4.5 | -7.1 | -1.5 | -7.1 | -3.6 | -6.7 | -6.4 | -7.2 | -7.3 | -5   | -5   | -6.7 | -5.3 | -8.2 | -7.1 | -7.6 | -8.3 | -8   | -8.4 | 2.00 |
| ZINC42756598_1 | -8.5 | -6   | -3.6 | -5   | -8   | -7.7 | -7   | -2.9 | -8.4 | -2.3 | -8   | -5.2 | -7.3 | -2.2 | -7.8 | -3.6 | -6.7 | -6.9 | -8.1 | -7.6 | -5.3 | -6.8 | -6.8 | -5.8 | -8.4 | -8.2 | -8.3 | -8.5 | -8.5 | -8.7 | 1.00 |
| ZINC42756588_2 | -8.4 | -6   | -4.1 | -4.2 | -7   | -7.5 | -6.1 | -2.3 | -8.2 | -1.9 | -7.6 | -4.9 | -7.1 | -2.8 | -7.1 | -2.2 | -6.6 | -6.6 | -7.3 | -7.6 | -3.4 | -6.7 | -6.8 | -5.8 | -8.2 | -7.2 | -8.1 | -8.4 | -8.1 | -8.5 | 1.04 |
| ZINC42756602_1 | -7.9 | -6.2 | -4.7 | -4.4 | -6.7 | -6.8 | -5.9 | -3.6 | -7.8 | -4.9 | -6.9 | -5.1 | -6.8 | -2.1 | -6.6 | -3.1 | -6.3 | -6   | -6.9 | -6.6 | -3.7 | -5.5 | -6.5 | -5.1 | -7.5 | -7.4 | -8   | -7.3 | -7.8 | -7.6 | 1.54 |
| ZINC42756611   | -8.1 | -6.1 | -4.2 | -4.9 | -7   | -7   | -6.9 | -3.3 |      |      |      |      |      |      |      |      |      |      |      |      |      |      |      |      |      |      |      |      |      |      |      |

|                |      |      |      |      |      |      |      |      |      |      |      |      |      |      |      |      |      |      |      |      |      |      |      |      |      |      |      |      |      |      |      |
|----------------|------|------|------|------|------|------|------|------|------|------|------|------|------|------|------|------|------|------|------|------|------|------|------|------|------|------|------|------|------|------|------|
| ZINC49060333   | -7.9 | -5.7 | -2.3 | -4.2 | -6.9 | -6.7 | -6.7 | -1.7 | -8.3 | -2   | -7.8 | 0    | -7   | -4.8 | -6.8 | -0.8 | -6.8 | -5.8 | -7.3 | -6.7 | 4.9  | -6.6 | -7.2 | -6.6 | -7.2 | -7.3 | -7.1 | -7.5 | -7.5 | -8   | 3.01 |
| ZINC49470890   | -7.6 | -5.4 | -2.7 | -3.8 | -7   | -6.9 | -6.4 | -0.1 | -9.2 | -0.9 | -6.9 | -2.8 | -7   | 0.5  | -6.7 | -1.2 | -5.3 | -6.7 | -7.5 | -7   | -4.8 | -5.6 | -6.8 | -5.5 | -8   | -7.1 | -7.4 | -7.7 | -7.3 | -7.8 | 2.54 |
| ZINC49473544   | -7.5 | -4.6 | -2.9 | -2.5 | -7.2 | -6.8 | -6.5 | -0.9 | -8.5 | -1.5 | -6.8 | -1.9 | -6.2 | 1.1  | -6.9 | -0.5 | -5.2 | -7   | -7.4 | -6.9 | -4.5 | -4.6 | -6.8 | -4.8 | -8   | -7.1 | -7.5 | -7.6 | -7.3 | -7.7 | 2.59 |
| ZINC49473701   | -7.7 | -4.7 | -2   | -3.3 | -7.3 | -6.8 | -6.2 | -0.6 | -8.3 | -2   | -7   | 0.8  | -6.4 | 0.3  | -7.2 | -1.4 | -5.3 | -7.3 | -7.7 | -7.2 | -1.9 | -3.9 | -6.8 | -4.7 | -8.4 | -7.1 | -7.7 | -7.7 | -7.6 | -7.9 | 2.80 |
| ZINC49473788   | -7.7 | -4.5 | -1.6 | -2.1 | -6.9 | -6.8 | -6   | -0.6 | -8.6 | -0.2 | -7.3 | 2.9  | -6.4 | 1.3  | -6.9 | 0.1  | -5.3 | -6.9 | -7   | -6.9 | -3.6 | -4   | -6.8 | -5.3 | -7.7 | -7.2 | -7.6 | -7.6 | -7.5 | -7.8 | 3.14 |
| ZINC49481231   | -8   | -5.2 | -2.8 | -2.9 | -6.5 | -6   | -6.5 | -1.6 | -7.5 | -3.8 | -7   | -0.3 | -6.9 | 0.5  | -6.3 | -2.1 | -6.4 | -6.1 | -7.2 | -6.3 | -3.8 | -6.3 | -7   | -4.7 | -7.5 | -7.4 | -6.4 | -7.5 | -7.9 | -7.5 | 2.33 |
| ZINC49481418   | -8   | -5.2 | -2.9 | -3.1 | -6.7 | -6.3 | -6.2 | -1.2 | -7.6 | -3.4 | -7   | 1    | -6.9 | 0.3  | -6.3 | -1.6 | -5.5 | -6.3 | -7.4 | -5.8 | -3.8 | -6.7 | -7.1 | -4.9 | -7.2 | -7.4 | -6.7 | -7.4 | -7.7 | -7.5 | 2.47 |
| ZINC49481521   | -7.1 | -5   | -0.1 | -2.3 | -7.4 | -7.2 | -5.9 | -1.8 | -7.7 | -2.3 | -6.9 | -2.7 | -6.6 | 0.2  | -6.1 | -2.6 | -5.6 | -6   | -7.9 | -6.2 | -2.9 | -6.3 | -6.7 | -5.7 | -7   | -7.6 | -6.3 | -7.7 | -7.6 | -7.6 | 2.39 |
| ZINC49482290   | -6.9 | -5.1 | -2.8 | -2.8 | -6.7 | -6   | -5.6 | -2.9 | -7.6 | -2.1 | -6.7 | -3.7 | -5.9 | -0.1 | -6.4 | -0.4 | -5.1 | -6   | -6.9 | -6.2 | -4.1 | -6.1 | -6.2 | -5.4 | -7.7 | -6.9 | -7.5 | -7.7 | -7.4 | -8   | 2.70 |
| ZINC49482441   | -8.1 | -5.9 | -3.2 | -4.3 | -7.4 | -7.4 | -6.2 | -4.7 | -7.2 | -3.6 | -6.3 | -5.5 | -6.1 | -7   | -6.8 | -4.2 | -5.9 | -7.3 | -7.8 | -7.2 | -1.8 | -6.8 | -7   | -6.6 | -8   | -8   | -7.9 | -7.8 | -8.3 | -8.2 | 1.66 |
| ZINC49482897   | -7.6 | -5.1 | -3.7 | -4.2 | -7.4 | -7.2 | -6.3 | -2.6 | -7.5 | -3   | -6.9 | 0.3  | -6.5 | -0.5 | -6.1 | -3.2 | -5.7 | -5.9 | -7.9 | -7.2 | -4.1 | -6.2 | -6.5 | -5.7 | -6.9 | -7   | -7.6 | -7.6 | -7.6 | -7.6 | 2.16 |
| ZINC49485175   | -7.4 | -4.9 | -3   | -3.7 | -7.3 | -6.8 | -6   | -1.9 | -7.5 | -1.8 | -7   | -2.3 | -6.4 | -1.5 | -6.3 | -1.9 | -6.1 | -5.9 | -7.4 | -5.8 | -3.4 | -4.8 | -6.5 | -5.6 | -7.7 | -6.8 | -7.3 | -6.9 | -7.5 | -7.6 | 2.38 |
| ZINC49505602   | -8   | -5.6 | -1.6 | -1.7 | -6.4 | -6.2 | -6.4 | -0.6 | -7.6 | 0.6  | -7   | -2.9 | 7    | 0    | -6.6 | -1.7 | -5.9 | -6.2 | -7.3 | -6.6 | -4.8 | -6.7 | -7.2 | -6   | -7.2 | -6.6 | -7   | -7.3 | -7.1 | -7.5 | 2.54 |
| ZINC49509888   | -7.6 | -5.7 | -3.7 | -4.2 | -7.2 | -6.6 | -6.7 | -0.9 | -8.4 | -2   | -7.1 | -4.7 | -6.9 | 0    | -6.6 | -1.5 | -5.9 | -6.9 | -7.4 | -7.7 | -4.7 | -6.4 | -7   | -5.3 | -8   | -7.5 | -7.4 | -8   | -7.5 | -8.1 | 2.27 |
| ZINC49934216_2 | -7.6 | -4.4 | -2.9 | -4   | -5.6 | -6.1 | -4.7 | -5.4 | -6.8 | -4.1 | -6.3 | -4.1 | -5.1 | -5   | -5.4 | -3.7 | -5   | -5.3 | -6.5 | -6.1 | -0.5 | -6.2 | -6.5 | -5.6 | -7.1 | -6.4 | -6.8 | -7.1 | -6.7 | -6.9 | 1.49 |
| ZINC49994445   | -7.6 | -5   | -3.8 | -3   | -7.5 | -6.8 | -6.7 | -1.2 | -8.1 | -0.8 | -7.4 | -3.4 | -6.5 | 1    | -7.1 | -1.2 | -6   | -7.6 | -7.5 | -6.7 | -4.4 | -4.7 | -6.9 | -4.8 | -8   | -7   | -7.1 | -7.7 | -7.2 | -7.8 | 2.48 |
| ZINC50041260   | -7.6 | -5.2 | -2.6 | -3   | -7   | -6.6 | -6.3 | 0.7  | -8.9 | -0.7 | -6.9 | 1.6  | -6   | 1.7  | -6   | -0.4 | -5.5 | -6.9 | -7.4 | -7.2 | -4.5 | -5.1 | -6.7 | -5.7 | -7.8 | -7.3 | -7.1 | -7.8 | -7.6 | -7.9 | 3.01 |
| ZINC51342776   | -7.5 | -5.9 | -1.6 | -5.3 | -6.9 | -7.1 | -4.8 | -1.7 | -7.7 | -2.3 | -6.7 | 0.6  | -6.3 | -0.9 | -6.5 | -2.2 | -6.4 | -5.6 | -7.5 | -7.2 | -2.9 | -3.6 | -6.5 | -5.1 | -7   | -7.3 | -6.7 | -7   | -7.5 | -7.3 | 2.36 |
| ZINC52491820   | -7.6 | -4.5 | -2.8 | -0.5 | -7.8 | -6.4 | -6   | -2.8 | -8.3 | -1   | -7.4 | -2.7 | -6.9 | -3.9 | -6.5 | 1.5  | -6.6 | -6.2 | -6.8 | -6.3 | -4.8 | -6   | -7.1 | -6.2 | -7.7 | -8   | -7.7 | -8.1 | -8.1 | -8.3 | 2.55 |
| ZINC5242258    | -7.6 | -5.2 | -2.3 | -0.8 | -7.1 | -6.6 | -6.2 | -4.1 | -8.1 | -1.6 | -6.6 | -2.3 | -5.7 | -3.1 | -6.3 | -1   | -6.2 | -6.3 | -6   | -6.8 | -2.9 | -5.6 | -6.6 | -5.7 | -7   | -7.2 | -7.4 | -7.4 | -7.4 | -7.6 | 2.15 |
| ZINC53605079   | -8   | -5.3 | -3.3 | -4.4 | -7.1 | -6.5 | -6.5 | -3.3 | -7.9 | -1.4 | -6.9 | -2.5 | -7.4 | 0.3  | -7.6 | -3.2 | -6.4 | -6.4 | -7.4 | -6.9 | -5.4 | -5.8 | -7.3 | -5.3 | -8   | -7.8 | -7.2 | -7.8 | -8   | -8.1 | 2.19 |
| ZINC53606293   | -7.5 | -6.3 | -5.3 | -4.5 | -8   | -7.5 | -6.1 | -3.8 | -7.9 | 1.5  | -7.3 | -2.7 | -6.9 | -3.8 | -7.6 | -3.2 | -6.3 | -6.9 | -7.5 | -7.3 | -5.3 | -6.5 | -7   | -6.3 | -7.6 | -7.3 | -7   | -7.8 | -7.6 | -7.6 | 2.07 |
| ZINC53606721   | -8.2 | -6.2 | -2.8 | -1.1 | -7.7 | -7.2 | -6.4 | -1.9 | -8.4 | -2.9 | -7.1 | -4.9 | -7.2 | -5.1 | -7.1 | -3.5 | -6.6 | -6.7 | -7.5 | -7.6 | -3.8 | -6.8 | -7.2 | -7.2 | -7.8 | -7.8 | -7.4 | -8   | -8   | -7.7 | 2.03 |
| ZINC53617268   | -7   | -5.3 | -0.7 | -0.1 | -5.1 | -5.7 | -5.4 | -1.8 | -7.5 | -1.8 | -7.1 | 2.6  | -7   | -1.1 | -6.4 | 1.5  | -5.1 | -6   | -6.5 | -5.5 | 5.2  | -5.2 | -6.3 | -4.6 | -6.8 | -7.1 | -6.5 | -7.7 | -7.4 | -7.9 | 3.39 |
| ZINC53945242   | -7.5 | -5.5 | -4.8 | -3.4 | -7.2 | -6.8 | -6.2 | -3.8 | -7.2 | -4.3 | -7.2 | -2   | -6   | -5.2 | -7   | -4.5 | -5.9 | -7.1 | -7.5 | -7.6 | -3.2 | -5.5 | -6.7 | -6.2 | -7.7 | -7.1 | -7.1 | -7.7 | -7.4 | -7.8 | 1.57 |
| ZINC54010215   | -7.5 | -3.7 | -3.6 | -3.1 | -5.6 | -5.2 | -5.1 | -3.8 | -7.2 | -3.8 | -6   | 0.7  | -5.5 | -5.1 | -5.8 | -3.2 | -5.4 | -5.8 | -6.6 | -6   | -4.5 | -6.6 | -6.5 | -7.2 | -6.9 | -6.6 | -7.2 | -7   | -7   | -7   | 1.76 |
| ZINC54062835   | -5.5 | -6.1 | -5.5 | -5.1 | -6.9 | -6   | -5   | -5.5 | -7   | -6   | -4.9 | -5   | -5   | -6.2 | -5   | -5.2 | -5   | -4.5 | -6.2 | -5.6 | -3.5 | -6.4 | -6.2 | -5.3 | -6.8 | -6.4 | -7.2 | -6.7 | -7.1 | -7.4 | 0.92 |
| ZINC54203154   | -7.6 | -5.8 | -5.5 | -5.5 | -6.1 | -5.7 | -5.8 | -5.8 | -7.4 | -5   | -6   | -5.6 | -5.4 | -6.5 | -5.9 | -5.2 | -5.6 | -5.7 | -6   | -5.4 | -3.4 | -6.6 | -6.5 | -6.8 | -7.3 | -7.1 | -7.6 | -7.4 | -7.4 | -7.7 | 0.98 |
| ZINC54252125   | -7.5 | -5.6 | -2.5 | -4.1 | -7.1 | -6.9 | -6.5 | -0.7 | -9   | -1.2 | -7.3 | -2.2 | -7   | -0.8 | -7.3 | -0.5 | -6.1 | -6.8 | -7.8 | -7.3 | -3.4 | -4.7 | -7.1 | -4.6 | -7.6 | -7.1 | -7.2 | -7.5 | -7.4 | -7.8 | 2.51 |
| ZINC54341261   | -7.6 | -5.5 | -5.5 | -4.8 | -7.1 | -6.6 | -5.7 | -5.8 | -7.6 | -5.7 | -6.7 | -5.6 | -5.7 | -7.3 | -6.6 | -5.7 | -6.1 | -5.8 | -7   | -6.8 | -3.8 | -6.8 | -6.9 | -6.2 | -7.6 | -6.9 | -7.5 | -7.5 | -7.3 | -7.9 | 0.96 |
| ZINC54421154   | -7.6 | -4.1 | -5.5 | -3.5 | -6.9 | -6.5 | -6.1 | -4.2 | -8   | -3.1 | -6.6 | -4.1 | -3.9 | -5.2 | -6   | -3.5 | -5.3 | -5.9 | -7.4 | -5.6 | -5.7 | -6.7 | -6.5 | -7.4 | -7.3 | -7.3 | -7.4 | -7.4 | -7.5 | -7.6 | 1.48 |
| ZINC54584012   | -7.6 | -6.5 | -5.1 | -4.4 | -7.9 | -6.8 | -6.5 | -5   | -8.5 | -4.5 | -8   | -4.2 | -6.7 | -5.3 | -7.4 | -3.9 | -6.8 | -7   | -8.2 | -6.3 | -4.7 | -6.4 | -6.5 | -6.3 | -8   | -6.9 | -7   | -7.5 | -7   | -7.8 | 1.29 |
| ZINC54627586   | -7.8 | -6.1 | -3   | -4   | -7.4 | -6.4 | -6.8 | -2   | -8.4 | -4   | -8   | -1.9 | -7.7 | -1.8 | -6.9 | -2.3 | -7   | -7   | -7.5 | -5.9 | -3.9 | -4.9 | -7   | -5.3 | -7.6 | -7.1 | -7   | -7.8 | -7   | -7.8 | 2.07 |
| ZINC54664357   | -7.5 | -5.4 | -4.8 | -4.5 | -7.5 | -7   | -6.1 | -5.2 | -7.3 | -5.1 | -7.7 | -5.4 | -5.9 | -6.1 | -6.5 | -5.3 | -5.3 | -6.9 | -7.3 | -7.2 | -4.4 | -7.2 | -7.7 | -6.7 | -7.4 | -7.1 | -7.9 | -7.9 | -7.3 | -7.6 | 1.11 |
| ZINC54664850   | -7.6 | -5.5 | -4.5 | -4.3 | -7.4 | -6.7 | -5.6 | -3.8 | -7   | -3.9 | -5.6 | -5.3 | -5.8 | -4.6 | -6.7 | -2.6 | -4.9 | -6.1 | -7.5 | -7   | -0.7 | -5.1 | -6.1 | -6.2 | -7.8 | -7.2 | -7.5 | -7.4 | -7.5 | -7.7 | 1.68 |
| ZINC54679491_1 | -7.2 | -5.6 | -3.7 | -3.1 | -7.1 | -6.2 | -6.6 | -2.1 | -7.8 | -2   | -6.9 | -3.4 | -5.7 | -0.9 | -6.6 | 0    | -5.3 | -6   | -7   | -6   | -4.6 | -5.5 | -6.6 | -5.5 | -7.2 | -7.1 | -7.1 | -7.1 | -7.1 | -7.3 | 2.08 |
| ZINC55100480   | -7.6 | -5.1 | -3.4 | -3.3 | -7.1 | -6.8 | -6.3 | -3.1 | -7   | -3.5 | -6.7 | -3.9 | -6.6 | -1.6 | -6.2 | 0    | -6.1 | -6.7 | -7.6 | -7.3 | -3.1 | -6.2 | -7   | -6.2 | -7.8 | -7.1 | -7.4 | -7.7 | -7.3 | -7.8 | 2.70 |
| ZINC55152758   | -7.5 | -6   | -6   | -5.6 | -6.2 | -5.8 | -5.3 | -6.1 | -7.7 | -5.8 | -6.4 | -5.6 | -5.4 | -7   | -5.9 | -5.6 | -6.5 | -6.5 | -6.5 | -6.3 | -4   | -7.2 | -6.9 | -6.3 | -6   | -6.9 | -6.3 | -6.5 | -6.5 | -7.7 | 0.77 |
| ZINC55391992   | -6.9 | -4.4 | -0.6 | -2.2 | -7.3 | -7.2 | -6.1 | 0.3  | -7.8 | -1.2 | -6.6 | -4.1 | -4.7 | 1    | -5.5 | 0.7  | -5.1 | -6.9 | -7.4 | -7.3 | -2.3 | -4.9 | -6.5 | -4.4 | -7.1 | -7.2 | -6.2 | -7.1 | -6.8 | -7.7 | 3.19 |
| ZINC55486588   | -7.5 | -4.9 | -3.2 | -2   | -7.3 | -7   | -5.9 | -2   | -8   | -2.8 | -7.6 | -0.8 | -5.9 | 0.2  | -6.4 | -2.5 | -6.9 | -6.1 | -7.6 | -7.1 | -4.6 | -6.4 | -7   | -4.6 | -7.3 | -7.4 | -7.1 | -7.4 | -7.4 | -7.6 | 2.46 |
| ZINC55589225_1 | -7.7 | -5.8 | -5.4 | -4.9 | -6.6 | -6.5 | -5.4 | -6.2 | -7.2 | -5.4 | -5.8 | -5.1 | -5.7 | -6.1 | -5.8 | -5.5 | -5.8 | -5.9 | -6.2 | -5.3 | -4.9 | -6.4 | -6.2 | -6.2 | -7.2 | -7.4 | -7.3 | -7.8 | -7.5 | -7.8 | 0.89 |
| ZINC55981354   | -7.9 | -4.7 | -3.3 | -0.7 | -7   | -7   | -6   | -2.5 | -8.1 | -4.2 | -6.2 | -6.3 | -6.6 | -3.6 | -6.7 | 1.6  | -5.6 | -6.6 | -6.9 | -6.8 | -5.7 | -6.9 | -7.1 | -6   | -8.1 | -7.2 | -7.7 | -7.8 | -7.5 | -8.1 | 3.02 |
| ZINC56080688_1 | -8.1 | -6.1 | -3.8 | -4.5 | -7.1 | -6.6 | -6.7 | -1.2 | -8.7 | -1.2 | -7.5 | -4.6 | -7.3 | -1.5 | -6.8 | -0.6 | -7   | -6.5 | -7.4 | -6.3 | -3.1 | -6.7 | -6.9 | -5.2 | -8.1 | -7.1 | -7.1 | -8.1 | -7.3 | -8.1 | 2.30 |
| ZINC56224960   | -7.5 | -4.6 | -1.6 | -0.9 | -6.5 | -6.6 | -5.9 | 0.6  | -7.9 | -0.4 | -6   | 2.3  | -6.5 | 7.2  | -6.3 | -0.8 | -5.6 | -6.7 | -6.6 | -6.4 | -3.6 | -5.6 | -6.8 | -4.8 | -6.6 | -7.2 | -6.9 | -7.6 | -7.6 | -7.4 | 3.56 |
| ZINC56905199   | -8   | -6.4 | -4.4 | -4.5 | -7.3 | -7.4 | -7.2 | -2.6 | -8.7 | -3.6 | -7.2 | -4.1 | -7   | -2.6 | -7.8 | -2.5 | -6.6 | -6.7 | -7.5 | -6.8 | -5.9 | -6.7 | -6.8 | -6.1 | -7.8 | -7.1 | -7.5 | -7.7 | -7.5 | -7.8 | 1.95 |
| ZINC56905203   | -7.6 | -6.5 | -3.5 | -4.7 | -7.4 | -7   | -7.2 | -2.2 | -8.3 | -2.5 | -7.2 | -1.7 | -7   | -0.8 | -7.2 | -2.2 | -5.8 | -6.6 | -7.3 | -7.1 | -3.7 | -5.7 | -7.2 | -6   | -7.6 | -6.9 | -7.1 | -7.4 | -7.3 | -7.6 | 2.13 |
| ZINC57772413   | -7.8 | -3.3 | 0.4  | -0.5 | -7   | -6   | -5.6 | -1.8 | -7.6 | -1.8 | -6.5 | 1.7  | -4.3 | -1.1 | -5.2 | -3.6 | -5.5 | -5.9 | -6.9 | -4.8 | -0.5 | -5.4 | -7.5 | -5.3 | -6.7 | -6.9 | -6.7 | -7.5 | -6.9 | -7.7 | 3.12 |
| ZINC57830253   | -7.6 | -5.6 | -4.4 | -4.6 | -7.3 | -6.6 | -6   |      |      |      |      |      |      |      |      |      |      |      |      |      |      |      |      |      |      |      |      |      |      |      |      |

|                |      |      |      |      |      |      |      |      |      |      |      |      |      |      |      |      |      |      |      |      |      |      |      |      |      |      |      |      |      |      |      |
|----------------|------|------|------|------|------|------|------|------|------|------|------|------|------|------|------|------|------|------|------|------|------|------|------|------|------|------|------|------|------|------|------|
| ZINC63828943   | -7.4 | -5.7 | -3.8 | -2.7 | -7   | -6.9 | -6.3 | -3.7 | -8.3 | -3.5 | -7.3 | -3   | -6.9 | -4.1 | -7.1 | -2.6 | -6.3 | -6   | -7.5 | -6.4 | -5.5 | -6.7 | -6.8 | -6.7 | -7.3 | -7.2 | -6.9 | -7.7 | -7.2 | -7.2 | 1.64 |
| ZINC63922364   | -7.7 | -5.6 | -1.7 | -0.5 | -6.4 | -6.1 | -5.3 | -1   | -7.9 | -1   | -6.5 | 3.9  | -6.3 | -2.3 | -6.9 | -1.4 | -6.1 | -6.2 | -6.8 | -6.8 | -4.5 | -5.7 | -7.1 | -5.6 | -8.3 | -7.2 | -7.5 | -7.9 | -7.5 | -8   | 2.92 |
| ZINC64025783   | -7.5 | -4.4 | -4.3 | -4.4 | -7.5 | -6.7 | -5.2 | -4.6 | -7.8 | -4.7 | -7.6 | -1.6 | -5.6 | -5   | -6.1 | -3.2 | -5.3 | -5.6 | -7.4 | -6.4 | -4.2 | -6.4 | -6.8 | -6.7 | -7.6 | -7.1 | -7.3 | -7.5 | -7.5 | -7.7 | 1.57 |
| ZINC64025940   | -7.5 | -4.5 | -4.4 | -2.2 | -6.1 | -6.4 | -4   | -2.5 | -7.2 | -2.2 | -5.5 | 0.5  | -4   | -4.1 | -5.3 | -1.1 | -3.3 | -5.3 | -6   | -3.3 | -5   | -6.1 | -5.7 | -6.9 | -6.3 | -6.4 | -7.6 | -6.6 | -7.3 | 2.00 |      |
| ZINC64345964   | -7.6 | -5.9 | -5.8 | -5.1 | -7.1 | -7.2 | -6.3 | -6.2 | -7.2 | -5.4 | -6.7 | -5.1 | -6.8 | -6.2 | -6.6 | -5   | -7   | -6.5 | -7.5 | -7   | -4.6 | -6.9 | -7.4 | -6.5 | -7.6 | -7.1 | -7.4 | -7.5 | -7.4 | -7.8 | 0.89 |
| ZINC64501944   | -7.8 | -6   | -4.2 | -4.1 | -7.2 | -6.8 | -7.5 | -1.6 | -9.4 | -3.4 | -7.4 | -4.5 | -7.4 | -0.4 | -7.3 | -2.6 | -6.3 | -7.4 | -7.7 | -7.4 | -4.6 | -6   | -6.4 | -5.3 | -8   | -7.2 | -7.3 | -7.8 | -7.2 | -7.9 | 2.09 |
| ZINC64562414   | -7.5 | -5.1 | -3.6 | -4.8 | -6.8 | -6.4 | -6.5 | -3.8 | -8.2 | -4.2 | -7.1 | -1.3 | -6   | -4.2 | -6.6 | -3.1 | -6   | -5.6 | -6.6 | -6.8 | -1.7 | -6.4 | -6.6 | -5.6 | -7   | -7.1 | -7.4 | -7.4 | -7.3 | -7.4 | 1.75 |
| ZINC64613223   | -6.7 | -5.4 | -5.2 | -5.4 | -7.1 | -6.6 | -5.7 | -5.8 | -8.6 | -5.3 | -7.1 | -4.9 | -6.3 | -5.9 | -6.5 | -5.2 | -5.9 | -5.9 | -7   | -6.9 | -5.6 | -7.2 | -7.1 | -6.7 | -7.3 | -6.7 | -7   | -7.1 | -6.7 | -7.5 | 0.86 |
| ZINC64653798   | -7.6 | -5.7 | -5.3 | -5.4 | -7.2 | -6.7 | -5.2 | -5.8 | -8.6 | -5.3 | -7.4 | -5   | -5.4 | -6.2 | -6.1 | -5.4 | -5.6 | -6.4 | -7.3 | -6.8 | -4.1 | -6.7 | -6.7 | -6.7 | -7.6 | -7.1 | -7.3 | -7.5 | -7.3 | -7.8 | 1.04 |
| ZINC64774992   | -7.7 | -5.5 | -5.4 | -5.5 | -7.2 | -6.8 | -5.4 | -5.9 | -7   | -5.2 | -5   | -5.3 | -6.2 | -4.8 | -6   | -6.2 | -6.9 | -6.9 | -5.2 | -6.9 | -6.3 | -6.5 | -7.3 | -6.7 | -7.4 | -6.7 | -7.4 | -6.7 | -7.6 | -7   | 0.86 |
| ZINC64813354   | -7.7 | -5.1 | -2.4 | 0.6  | -6.5 | -6.2 | -6.3 | -2.8 | -7.8 | -2.1 | -6.7 | 1.6  | -5.7 | -1.2 | -6   | 2.3  | -5.7 | -5.7 | -7.4 | -6.6 | -1.7 | -5.9 | -6.7 | -5.7 | -7   | -6.8 | -7   | -7.4 | -7.3 | -7.7 | 2.89 |
| ZINC64854495   | -7.6 | -3.2 | -5.1 | 0.6  | -7   | -7.4 | -5   | -3.9 | -8.1 | -4.1 | -6   | -3.3 | -5.4 | -4.5 | -5.8 | -2.4 | -5   | -6.2 | -7   | -6.7 | -4.3 | -7.3 | -6.9 | -6.7 | -6.9 | -7.1 | -7.6 | -7.5 | -7.5 | -7.7 | 1.85 |
| ZINC64951766   | -6.6 | -5.5 | -5.2 | -5.4 | -7.2 | -6.7 | -6.8 | -5.2 | -7.9 | -5.2 | -6.7 | -5.5 | -5.7 | -6.1 | -6.5 | -4.5 | -5.3 | -6.2 | -7.4 | -6.7 | -4.1 | -7.1 | -6.4 | -6.6 | -7.1 | -6.6 | -7.5 | -6.9 | -6.6 | -7.8 | 0.95 |
| ZINC64963812   | -5.9 | -4   | -1.1 | -2.9 | -6.1 | -5.7 | -4.2 | -1.7 | -7.4 | -2.5 | -5.6 | 1.5  | -5.9 | 1.2  | -5.3 | 3.6  | -4.3 | -6   | -7.3 | -6.2 | -3.8 | -5.3 | -6.8 | -5.4 | -7.1 | -7   | -7.4 | -7.2 | -7.4 | -7.6 | 2.88 |
| ZINC65045553_1 | -6.6 | -5.6 | -3.2 | -3.9 | -6.7 | -6.2 | -6.7 | -2.2 | -8.3 | -2.1 | -6.5 | 0.1  | -6.8 | -0.9 | -6.9 | -1.3 | -6   | -6.4 | -7.2 | -6.6 | -2.8 | -5.9 | -6.8 | -6   | -7.5 | -7.1 | -6.7 | -7.7 | -7.2 | -7.6 | 2.29 |
| ZINC65129467   | -5.3 | -4.2 | -3.2 | -2.5 | -6.3 | -6.4 | -6.7 | -4   | -8.1 | -1.9 | -5.7 | -3.1 | -7.2 | -2.7 | -5.8 | -2.3 | -6.3 | -5.8 | -6.6 | -5.9 | -5.3 | -6.3 | -6.7 | -6.7 | -7.1 | -7.1 | -7.3 | -7.2 | -7.4 | -7.3 | 1.77 |
| ZINC65197369   | -7.5 | -6.1 | -4.7 | -3.6 | -6.6 | -6.1 | -5.9 | -4.4 | -7.3 | -4.9 | -7.3 | -4.9 | -6.3 | -5   | -7   | -5   | -6.6 | -6.2 | -6.9 | -6.4 | -4.9 | -7   | -6.6 | -7   | -7   | -7.3 | -6.8 | -7.8 | -7.5 | -7.7 | 1.11 |
| ZINC65197372   | -7.2 | -6.2 | -5.5 | -4.2 | -6.8 | -6.2 | -6.2 | -4.7 | -7.8 | -2.7 | -7.3 | -1.9 | -6.3 | -4.9 | -7   | -5.1 | -6.5 | -6.4 | -7.2 | -6.6 | -3.6 | -7.3 | -6.8 | -7.6 | -7.1 | -7.5 | -6.6 | -8   | -7.7 | -7.9 | 1.54 |
| ZINC65214931   | -7   | -5.7 | -5.4 | -4.1 | -6.6 | -6.3 | -6.3 | -5.5 | -7.8 | -5.3 | -6.7 | -5.5 | -6.6 | -6   | -5.5 | -5   | -6.6 | -5.9 | -7.6 | -7.4 | -4.7 | -6.8 | -6.5 | -6.4 | -7.3 | -7.2 | -6.8 | -7.6 | -7.4 | -7.6 | 0.95 |
| ZINC65236018   | -8   | -6.8 | -3.9 | -3.2 | -7.2 | -6.8 | -7.4 | -2.7 | -8.3 | -3.4 | -8.1 | -0.9 | -8   | -1.8 | -7.4 | -4.4 | -7   | -6.4 | -8   | -6.4 | -5   | -6.7 | -7.1 | -6.6 | -7.7 | -7.2 | -6.8 | -7.9 | -7.5 | -8   | 2.05 |
| ZINC65249261   | -7.5 | -2.8 | -0.1 | -3.5 | -6.6 | -6   | -6   | -1.5 | -8.1 | -1   | -5.7 | -3.7 | -3.8 | -2.1 | -5.5 | 0.1  | -3.8 | -6.8 | -6.3 | -6   | -1.3 | -4.8 | -7.9 | -5.6 | -7.3 | -7.1 | -7   | -7.2 | -7   | -7.3 | 2.60 |
| ZINC65259491   | -7.7 | -3.3 | -1.2 | 0.6  | -6.9 | -5.7 | -4.1 | -1.6 | -7.8 | -0.4 | -6   | -1.3 | -5.2 | -2.6 | -5.9 | 1.6  | -5.2 | -5.9 | -7   | -6.5 | -3.6 | -5.7 | -6.5 | -5.5 | -6.8 | -6.7 | -7   | -7.2 | -7.1 | -7.3 | 2.64 |
| ZINC65259491_1 | -7.6 | -3.2 | -1.3 | 1.5  | -6.8 | -5.8 | -4.2 | -0.9 | -7.2 | -2.5 | -6   | 2.2  | -6.1 | -0.9 | -6.4 | 0.4  | -5.4 | -5.9 | -7   | -5.7 | -3.7 | -6.5 | -6.7 | -5.6 | -6.9 | -6.7 | -7   | -7.2 | -7.1 | -7.3 | 2.86 |
| ZINC65286833_1 | -6.3 | -4.9 | -4.2 | -5.1 | -6.6 | -5.9 | -5.5 | -4.8 | -7.8 | -4.4 | -7.1 | -3.3 | -6.5 | -5   | -6.5 | -4.6 | -5.8 | -6.2 | -7.3 | -6.2 | -5.1 | -6.6 | -7.2 | -5.8 | -7.3 | -7.3 | -7.1 | -7.7 | -7.1 | -7.5 | 1.18 |
| ZINC65287088   | -7.5 | -4.7 | -4.1 | -2   | -6   | -6.8 | -5.6 | -0.5 | -7.8 | -3   | -6.8 | -4.2 | -7   | -0.4 | -6.7 | -1.2 | -5.5 | -6.6 | -7.3 | -6.2 | -2.2 | -6.4 | -6.6 | -5   | -7.6 | -6.6 | -7.1 | -7.1 | -6.9 | -7.6 | 2.23 |
| ZINC65287412   | -6.5 | -4.4 | -2.2 | -2.3 | -6   | -6.8 | -5.6 | -1.2 | -7.5 | -1.6 | -7   | -1.5 | -5.4 | -0.3 | -6   | -0.8 | -6.2 | -6.2 | -7.5 | -6.8 | -0.7 | -5.5 | -6.4 | -5.1 | -7.1 | -7   | -7.2 | -7.5 | -7   | -7.6 | 2.46 |
| ZINC65383244   | -7.5 | -5.7 | -5.2 | -5.3 | -7.1 | -6.6 | -5.8 | -6.2 | -6.1 | -5.2 | -5.9 | -4.2 | -5.4 | -4.8 | -6.6 | -3.4 | -5.2 | -6   | -7   | -5.8 | -5.6 | -5.8 | -6.9 | -6.2 | -7.7 | -6.3 | -7.6 | -7.4 | -7.2 | -7.7 | 1.05 |
| ZINC65410040_1 | -7.9 | -5.6 | -6.1 | -6.1 | -6.7 | -6.1 | -5.3 | -6   | -6.4 | -5.7 | -5.8 | -6   | -5.2 | -6.3 | -6.4 | -5.7 | -5.9 | -6.1 | -6.5 | -6.4 | -1.8 | -7.2 | -7.1 | -6.5 | -7.6 | -7.7 | -7.7 | -8   | -7.9 | 1.20 |      |
| ZINC65410228   | -6.1 | -4.9 | -5   | -4.8 | -5.3 | -5   | -4.4 | -4.9 | -7   | -4.7 | -5.2 | -5.2 | -5.4 | -5.3 | -5.1 | -3.9 | -4.5 | -5.6 | -5.8 | -5.5 | -3.7 | -6   | -6.1 | -6.1 | -7.7 | -6.8 | -7.6 | -7.6 | -7   | -8   | 1.14 |
| ZINC65434183   | -7.5 | -5.1 | -4.9 | -4.2 | -6.6 | -5   | -5.3 | -5.7 | -6.5 | -4.3 | -6.5 | -3.5 | -5.7 | -5   | -6.2 | -4   | -5.8 | -5.9 | -7.4 | -5.5 | -3.9 | -5.3 | -5.6 | -4.9 | -6   | -7.6 | -5.7 | -7.5 | -7.6 | -6.3 | 1.14 |
| ZINC65440959_1 | -7.5 | -5.8 | -5   | -4.1 | -6.8 | -6.6 | -5.6 | -5.4 | -7.1 | -3.4 | -6.7 | -3.5 | -6   | -4.8 | -7.1 | -4.5 | -6.6 | -6   | -6.9 | -6.8 | -4   | -6.4 | -6.2 | -6   | -7.5 | -6.7 | -7   | -7.3 | -7.1 | -7.7 | 1.22 |
| ZINC65461551_1 | -7.8 | -4.9 | -4.8 | -4.8 | -6.9 | -5.9 | -5.4 | -5.3 | -7.8 | -4.6 | -6.2 | -4.7 | -5   | -5.4 | -4.6 | -4   | -5   | -5.8 | -5.8 | -6.4 | -0.7 | -6.7 | -7.2 | -6.5 | -7   | -6.5 | -7.7 | -7.2 | -7.5 | -7.5 | 1.49 |
| ZINC65489074_1 | -7.6 | -6.4 | -2.5 | -1.1 | -7   | -6.7 | -6.6 | -3.1 | -8   | -1.9 | -7.7 | -1.8 | -6.3 | -0.8 | -6.7 | 0.1  | -5.9 | -6.4 | -7   | -6.6 | -4.1 | -6   | -6.4 | -5.7 | -7   | -7   | -7.4 | -7.3 | -7.4 | -7.6 | 2.38 |
| ZINC65499797   | -7.5 | -5   | -4.5 | -4.5 | -6.8 | -6.1 | -4.8 | -5.2 | -6.3 | -4.1 | -6.8 | -3.3 | -5.3 | -6.3 | -5.4 | -3.8 | -5.6 | -5.7 | -5.6 | -5.4 | 0.3  | -6.2 | -6.7 | -6.5 | -7.2 | -7.1 | -7.2 | -7   | -7.2 | -7.4 | 1.60 |
| ZINC65499802   | -7.6 | -4.1 | -6.2 | -5.3 | -5.3 | -6.1 | -4.6 | -5.5 | -6.9 | -4.9 | -5.8 | -4   | -5.4 | -6.1 | -5.7 | -4.4 | -6.2 | -5.5 | -5.6 | -5.2 | -1.9 | -6.5 | -6.7 | -6.5 | -7   | -6.8 | -7.4 | -7.3 | -7.4 | -7.3 | 1.25 |
| ZINC65506473   | -7.9 | -6.3 | -5.5 | -5   | -6.2 | -6.6 | -5.4 | -6   | -6.9 | -6   | -6.3 | -6.4 | -6.2 | -6.5 | -5.9 | -6   | -5.8 | -6.4 | -6.9 | -6.7 | -2.7 | -8   | -7.4 | -7   | -7.2 | -7.8 | -7.6 | -7.8 | -7.8 | -7.6 | 1.09 |
| ZINC65514564_1 | -7.5 | -5.3 | -5   | -5   | -6.9 | -6.3 | -6.3 | -4.4 | -8.2 | -4.5 | -8.4 | -4.7 | -7.2 | -5.6 | -7.7 | -3.6 | -6.4 | -6.1 | -7.5 | -7   | -4   | -6.1 | -6.7 | -6.3 | -7.7 | -7.3 | -7.5 | -7.9 | -7.5 | -8.2 | 1.35 |
| ZINC65514575   | -8.1 | -6.3 | -3.8 | 0.7  | -7   | -6.8 | -6.9 | -2.1 | -7.9 | -4.1 | -7.1 | 0.2  | -7.2 | -4.7 | -6.8 | -2.7 | -6.4 | -5.7 | -6.8 | -6.3 | -3.7 | -6.2 | -6.6 | -6.6 | -7.4 | -7.5 | -7.7 | -7.9 | -8   | -7.2 | 2.32 |
| ZINC65514580   | -8.6 | -6.7 | -4   | -2.7 | -7.5 | -7.4 | -7.2 | -3.2 | -8.3 | -3.5 | -7.6 | -5.6 | -7.5 | -3.6 | -7.2 | -3.4 | -6   | -6.1 | -7.5 | -7.3 | -5.2 | -6.5 | -6.7 | -6.8 | -7.4 | -8   | -8.5 | -7.7 | -8.5 | -7.9 | 1.77 |
| ZINC65514580_2 | -7.7 | -6.7 | -5.3 | -4.3 | -7.4 | -7.4 | -6.6 | -3.9 | -8.3 | -3.9 | -7.7 | 2.9  | -7.5 | -3.7 | -7.3 | -3.9 | -6.9 | -6.5 | -7.4 | -7.2 | -4.8 | -6.6 | -6.6 | -7.1 | -7.9 | -8   | -8   | -7.6 | -7.9 | -7.6 | 2.25 |
| ZINC65514802_2 | -8.6 | 0.2  | -3.3 | -3.6 | -7.9 | -7.9 | -7.4 | -1.9 | -9.1 | -2.6 | -8.2 | -0.8 | -7.5 | -1.4 | -7.9 | -2.8 | -7   | -7.1 | -7.8 | -7.2 | -2.4 | -4.8 | -7   | -5.5 | -8.2 | -7.9 | -8.4 | -7.9 | -8.5 | -8.6 | 2.80 |
| ZINC65514882_1 | -7.7 | -5.3 | -4.3 | -3.5 | -7.4 | -7.1 | -6.1 | -3.8 | -8.1 | -4.1 | -7.2 | -3.3 | -6.7 | -4.4 | -6.8 | -2.5 | -6.3 | -6.5 | -7.3 | -7   | -4.1 | -4.7 | -6.4 | -6.3 | -7.5 | -7.3 | -7.8 | -7.8 | -7.7 | -8.2 | 1.66 |
| ZINC65514957_2 | -8   | -6.4 | -3.6 | -4.3 | -7.6 | -6.7 | -7   | -3.2 | -8.7 | -2.5 | -7.8 | -5.9 | -7.2 | -3.6 | -6.9 | -2.4 | -6.5 | -6.7 | -7.3 | -7.4 | -3.8 | -5.7 | -6.6 | -5.9 | -8   | -7.5 | -7.9 | -8   | -8   | -8.3 | 1.84 |
| ZINC65523395   | -7.5 | -2.4 | -0.5 | -0.9 | -6.6 | -6.2 | -6.2 | -2.1 | -7.2 | 2.3  | -5.5 | 3.5  | -3.9 | -0.3 | -6.8 | 2.3  | -4.1 | -5.3 | -4.5 | -5.8 | 7.5  | -6.4 | -6.5 | -5.1 | -7.4 | -7   | -7.5 | -7.4 | -7.3 | -7.7 | 3.99 |
| ZINC65526031   | -7.4 | -5.1 | -6.7 | -4.9 | -7   | -6.5 | -4.9 | -5.5 | -7.1 | -5.3 | -7.5 | -6.1 | -5.6 | -6.2 | -5.7 | -5.6 | -6   | -6.8 | -6.9 | -4.2 | -6.3 | -6.4 | -6.4 | -7.2 | -7.2 | -7.7 | -7.3 | -7.7 | -7.3 | -7.7 | 0.93 |
| ZINC65527373   | -7.7 | -4.7 | -4.5 | 0.3  | -6.1 | -6   | -5.9 | -4.2 | -7.9 | -5   | -6.3 | -4.4 | -5   | -5.6 | -6.7 | -1.6 | -6   | -6   | -5.9 | -6.6 | -3.8 | -6.4 | -7.6 | -6.1 | -7.5 | -6.9 | -7.3 | -7.2 | -7.2 | -7.5 | 1.43 |
| ZINC65591716   | -7.5 | -5.3 | -5.3 | -5.6 | -7.3 | -5.8 | -5.1 | -6.4 | -7.7 | -5.2 | -6.8 | -5.2 | -5.9 | -6.6 | -5.8 | -5.7 | -5.6 | -5.5 | -5.6 | -5.5 | -3.6 | -7.1 | -6.5 | -6.3 | -6.2 | -6.5 | -6.2 | -6.8 | -7.3 | -7.6 | 0.92 |
| ZINC66088637   | -7.7 | -4.6 | -4.6 | -3.6 | -6.7 | -6.8 | -4.9 | -4.7 | -7   | -5.6 | -6.1 |      |      |      |      |      |      |      |      |      |      |      |      |      |      |      |      |      |      |      |      |

|                |      |      |      |      |      |      |      |      |      |      |      |      |      |      |      |      |      |      |      |      |      |      |      |      |      |      |      |      |      |      |      |      |
|----------------|------|------|------|------|------|------|------|------|------|------|------|------|------|------|------|------|------|------|------|------|------|------|------|------|------|------|------|------|------|------|------|------|
| ZINC6962542_1  | -7.5 | -3.1 | -1.8 | 0.7  | -6.8 | -6.5 | -3.9 | -2.1 | -7.4 | -3.5 | -6.5 | -4.4 | -5.2 | -1.8 | -5.1 | 2.7  | -4.8 | -6.8 | -7.7 | -7.2 | -3.4 | -6.4 | -6.6 | -5.4 | -7.6 | -6.8 | -7.4 | -7.3 | -7.2 | -7.6 | 2.64 |      |
| ZINC69654729   | -7.7 | -4.4 | -3.6 | 2.3  | -6.7 | -6   | -6   | -3.7 | -8.1 | -2.1 | -6.2 | -2.5 | -5.4 | -4.7 | -6.6 | 1.8  | -6   | -6.3 | -6.4 | -7.2 | -4.3 | -7.4 | -7.4 | -6   | -7.5 | -7.2 | -7.6 | -7.5 | -7.5 | -7.9 | 2.61 |      |
| ZINC69678629   | -7.5 | -5   | -1.6 | -2.7 | -6.2 | -6.4 | -6.3 | -2.5 | -8.5 | -0.5 | -6.8 | -1.4 | -5.7 | -4   | -6   | -1.9 | -6.1 | -6.2 | -7   | -6.2 | -5.1 | -6.6 | -6.9 | -6.1 | -7.8 | -7   | -7.2 | -7.5 | -7.3 | -7.7 | 2.25 |      |
| ZINC69705019   | -7.8 | -6.5 | -6   | -5.8 | -7.4 | -7.2 | -7   | -6.5 | -7.9 | -4.8 | -7.4 | -5.5 | -7.3 | -6.5 | -6.1 | -5.2 | -7.2 | -6.2 | -7.8 | -6.9 | -5   | -6.8 | -7   | -6.9 | -7.3 | -7.3 | -7.4 | -7.9 | -7.6 | -7.8 | 0.88 |      |
| ZINC69738171   | -7.8 | -5.9 | -4.5 | -4.9 | -7.2 | -7   | -6.4 | -4.4 | -7.6 | -5.1 | -7.6 | -5.5 | -7   | -5.6 | -7.5 | -3.5 | -5.5 | -7.2 | -7   | -6.9 | -4   | -6.6 | -6.7 | -6.6 | -8.1 | -7.2 | -7.9 | -7.8 | -7.5 | -8   | 1.29 |      |
| ZINC69739031   | -7.6 | -6.4 | -4   | -1.8 | -7.1 | -6.8 | -7.4 | -2.4 | -9   | -1.4 | -7.6 | -1.6 | -8   | -1.5 | -7.2 | -3.3 | -6.8 | -6.3 | -7.6 | -7.1 | -4.9 | -6.9 | -7.3 | -5.8 | -7.6 | -7.2 | -7.7 | -7.5 | -7.5 | -7.6 | 2.26 |      |
| ZINC69769660   | -7.5 | -5.3 | -5.6 | -4.7 | -5.3 | -4.8 | -5.2 | -5.5 | -6.2 | -5.1 | -5.5 | -5.2 | -5.1 | -6.4 | -5.6 | -5.3 | -5.7 | -5.5 | -7   | -6.4 | -4.3 | -6.4 | -6.1 | -6   | -5.7 | -5.9 | -5.6 | -7.3 | -6   | -6.8 | 0.75 |      |
| ZINC69776239   | -7.5 | -4.4 | -4.9 | -3.8 | -6.9 | -6.4 | -5.6 | -4.6 | -6.5 | -4.5 | -7.2 | -4.3 | -6.3 | -4.5 | -6   | -3.9 | -4.8 | -6.3 | -6.6 | -5.7 | -4.5 | -6   | -6.1 | -5.3 | -7.2 | -7.1 | -6.9 | -7.5 | -7.1 | -7.2 | 1.17 |      |
| ZINC69813217_1 | -7.6 | -4.9 | -4.8 | -4.9 | -7.2 | -7.1 | -6.4 | -4.6 | -7.7 | -4.6 | -7.9 | -5   | -5.6 | -5.3 | -6.7 | -4.5 | -5.8 | -6.5 | -7.3 | -6.6 | -3.2 | -7   | -6.5 | -6.1 | -7   | -7   | -7.2 | -7.1 | -7.7 | -7.1 | 1.21 |      |
| ZINC69814577   | -7.7 | -3.7 | -4.4 | -0.9 | -6.9 | -6.9 | -6.7 | -5.4 | -2.6 | -7.5 | -4.1 | -7   | -3.8 | -5.7 | -3.5 | -7   | -0.5 | -4.7 | -6.9 | -8   | -7.4 | -3.9 | -6.6 | -6.7 | -5.3 | -7.5 | -7   | -7.5 | -7.4 | -7.4 | -7.8 | 2.07 |
| ZINC69814572_1 | -7.7 | -3.4 | -3.9 | -1.2 | -6.9 | -6.8 | -4.9 | -3.1 | -7.5 | -4.1 | -6.7 | -5.3 | -5.1 | -3.6 | -4.7 | 1    | -4.3 | -6.8 | -6.7 | -7.3 | -3.8 | -6.3 | -6.7 | -5.9 | -7.5 | -7.4 | -7.5 | -7.4 | -7.8 | 2.15 |      |      |
| ZINC69814577_2 | -7.7 | -3.7 | -4.3 | -1   | -6.9 | -7   | -5.7 | -2.5 | -7.6 | -4.1 | -6.7 | -4.4 | -5.6 | -3.3 | -6.9 | 1.6  | -4.6 | -7   | -7.7 | -7   | -3.8 | -6.7 | -6.7 | -5.9 | -7.5 | -7   | -7.5 | -7.4 | -7.4 | -7.8 | 2.25 |      |
| ZINC69877273_2 | -7.4 | -4.5 | -3.4 | -3.9 | -7   | -6.2 | -4.8 | -4.9 | -7.1 | -2.9 | -6.3 | -4.7 | -5.8 | -5.1 | -6.1 | -3.9 | -4.7 | -6.3 | -7.5 | -6.2 | -4.6 | -6.9 | -6.5 | -6.3 | -7.4 | -7.3 | -6.9 | -7.5 | -7.3 | -7.5 | 1.37 |      |
| ZINC69896337   | -7.5 | -5.7 | -5.4 | -5.5 | -7.2 | -6.5 | -5.3 | -5.9 | -6.9 | -4.7 | -6.5 | -5.1 | -6   | -6   | -6.1 | -5.3 | -5.8 | -5.3 | -6.8 | -6.9 | -3.5 | -6.9 | -6.8 | -6.3 | -7.7 | -6.6 | -7.7 | -8   | -7.6 | -8.2 | 1.07 |      |
| ZINC69947027   | -7.6 | -5   | -4.6 | -4   | -7.8 | -7.3 | -6.5 | -5.2 | -7.8 | -4.5 | -6.6 | -3.9 | -6.1 | -5.4 | -6.9 | -4.4 | -5.9 | -6.6 | -7.8 | -7.1 | -0.5 | -7   | -6.3 | -6.5 | -7.2 | -7.2 | -7.6 | -7.2 | -7.4 | -7.6 | 1.62 |      |
| ZINC70731171   | -7.5 | -4.6 | -2.3 | -1.4 | -6.4 | -5.8 | -5.5 | -1.8 | -6.9 | -3   | -6.3 | 1.3  | -6.1 | -2.7 | -7   | -0.9 | -6.5 | -6.1 | -7.1 | -6.8 | -4.4 | -5.3 | -7.1 | -6.1 | -7.8 | -6.9 | -7   | -7.6 | -7.2 | -7.7 | 2.38 |      |
| ZINC70731260   | -7.7 | -6.1 | -5.8 | -4.9 | -5.8 | -6   | -4.7 | -5.5 | -7.5 | -5.2 | -5.7 | -5.8 | -5.6 | -6   | -6.6 | -4.9 | -5.6 | -6.3 | -6.9 | -6.6 | -3.6 | -6.4 | -7.2 | -6.6 | -7.4 | -7.1 | -7.4 | -7.7 | -7.4 | -7.8 | 1.04 |      |
| ZINC70731289   | -7.6 | -5.3 | -5.1 | -5   | -6.4 | -6.5 | -5.9 | -4.7 | -7.3 | -5.4 | -6.5 | -3.6 | -6.4 | -5.4 | -5.9 | -3.9 | -6.6 | -6.6 | -7   | -6.4 | -4.8 | -7.7 | -6.9 | -6.2 | -7.7 | -7.3 | -7.8 | -7.6 | -7.6 | -8   | 1.19 |      |
| ZINC70733271   | -7.7 | -5.7 | -2.8 | -3.9 | -6   | -6.1 | -6.8 | -3.7 | -8.3 | -3.1 | -6.9 | 2.3  | -4.1 | -3.2 | -6.1 | -2.8 | -6   | -6.5 | -6.5 | -6.4 | -4.7 | -6.9 | -7.3 | -6.6 | -6.7 | -7.2 | -7.6 | -7.4 | -7.5 | -7.6 | 2.21 |      |
| ZINC70735339   | -7.2 | -5.2 | -3.2 | -3.1 | -6.8 | -6.3 | -6.5 | -3.1 | -8.5 | -3.2 | -7.2 | -4.1 | -7.1 | -3.9 | -6.4 | -3   | -6.2 | -6.3 | -6.7 | -6.7 | -5.1 | -6.8 | -6.8 | -6.4 | -7.3 | -6.9 | -7.6 | -7.2 | -7.2 | -7.8 | 1.62 |      |
| ZINC70905342   | -7.7 | -2.5 | -2.7 | -1.2 | -6.1 | -6.3 | -5.8 | -2.2 | -8.1 | -3   | -7.8 | 4    | -5.7 | -2   | -7   | 2.3  | -6.6 | -6.3 | -6.6 | -5.8 | -4.8 | -6.7 | -7.5 | -6.3 | -7.4 | -7.5 | -7.9 | -7.6 | -7.5 | -7.8 | 3.06 |      |
| ZINC709933037  | -7.4 | -4.4 | -1.2 | -0.4 | -7.3 | -6.8 | -6.1 | -0.5 | -8.8 | -0.4 | -7   | -5   | -6.8 | 0.9  | -6.7 | -2.2 | -5.9 | -6.5 | -7.3 | -7.2 | -5.1 | -5.2 | -6.4 | -5.8 | -7.4 | -7.3 | -6.9 | -7.9 | -6.5 | -7.9 | 2.65 |      |
| ZINC71036780   | -8   | -5.4 | -3   | 0.5  | -7.2 | -6.3 | -6.1 | -2.7 | -7.7 | -0.6 | -6.4 | 0.2  | -4.4 | -0.7 | -5.9 | -0.9 | -6.3 | -6.4 | -7.2 | -7   | -4.9 | -6.2 | -7   | -5.7 | -7.5 | -7.3 | -7.8 | -7.8 | -7.9 | -8.2 | 2.68 |      |
| ZINC71297950   | -8   | -5.2 | -2.9 | -2.2 | -6.3 | -6.3 | -4.3 | -3.6 | -7.9 | -3.3 | -7.2 | 2.9  | -5.5 | -4.6 | -5.9 | -2.9 | -5   | -5.9 | -6.5 | -6.2 | 0.2  | -6.5 | -6.6 | -6.9 | -7.5 | -7.3 | -7.9 | -7.3 | -7.2 | -7.8 | 2.52 |      |
| ZINC71749577   | -7.9 | -1.4 | -0.1 | 5.8  | -7.5 | -6.7 | -4.7 | 0.6  | -7.5 | 1.9  | -7.1 | 2.1  | -6.2 | 4    | -7.4 | 2.3  | -5.3 | -5.9 | -7.4 | -6.7 | -4.3 | -5.6 | -6.8 | -5.2 | -7.8 | -7.3 | -7.2 | -7.5 | -7.6 | -8   | 4.14 |      |
| ZINC71753913   | -7.6 | -5.3 | -5.2 | -4.5 | -7.4 | -7   | -6.7 | -5.2 | -8   | -4.6 | -7.8 | -4.9 | -7.1 | -5.4 | -7.4 | -4.7 | -6.3 | -6.6 | -7.5 | -7.4 | -3   | -6.9 | -6.7 | -6.7 | -7.7 | -7.5 | -7.4 | -7.7 | -7.7 | -7.7 | 1.30 |      |
| ZINC71753913_1 | -7.7 | -5.2 | -4.6 | -4.5 | -7.5 | -7   | -6.7 | -5.1 | -8.1 | -4.6 | -7.8 | -5.1 | -7.1 | -5.5 | -7   | -4.5 | -5.7 | -6.3 | -7.6 | -6.7 | -4   | -6.5 | -6.7 | -6.5 | -7.5 | -7.6 | -7.4 | -7.9 | -7.7 | -7.9 | 1.26 |      |
| ZINC71803397_1 | -7.9 | -5.5 | -3   | -0.9 | -6.6 | -6.5 | -6.4 | -0.7 | -8.5 | -4.5 | -6.9 | -1.1 | -6.5 | -2.3 | -6.5 | 0.4  | -5.7 | -6.5 | -6.5 | -7.1 | -4.8 | -6.4 | -6.5 | -7.9 | -5.4 | -7.7 | -7.2 | -7.6 | -7.9 | -7.6 | 8.2  | 2.48 |
| ZINC71812293   | -7.5 | -4.9 | -2.9 | -2.3 | -6.7 | -6.2 | -5.2 | -2.9 | -7.6 | -3.1 | -6.1 | -3.8 | -6.7 | -2.4 | -6   | -1   | -6.2 | -6.1 | -5.9 | -5.9 | -4.8 | -5.4 | -6.7 | -5.9 | -6.9 | -6.9 | -7.3 | -7.2 | -7.4 | -6.9 | 1.80 |      |
| ZINC71859842   | -7.5 | -4.9 | -5.5 | -5.5 | -5.5 | -5.3 | -5.7 | -5.4 | -7.3 | -5.2 | -6.7 | -5   | -4.9 | -6.8 | -5.8 | -4.9 | -5.6 | -6.1 | -5.8 | -5.2 | -3.9 | -6.6 | -6.1 | -5.9 | -6   | -6.9 | -7.2 | -7.5 | -7.2 | -7.6 | 0.95 |      |
| ZINC71883563_1 | -7.6 | -5.1 | -1.4 | -0.3 | -7.1 | -6.7 | -6.4 | -1.4 | -9   | -1.8 | -7.1 | -3.3 | -6.5 | 1    | -7.1 | -1.6 | -4.8 | -6   | -6.8 | -6.5 | -3.3 | -6.3 | -6.7 | -5.3 | -7.7 | -7.3 | -7.7 | -7.7 | -7.5 | -7.7 | 2.63 |      |
| ZINC71888847   | -7.6 | -4.5 | -5.2 | -3.3 | -5.5 | -6.4 | -5.2 | -4.6 | -6.7 | -4.8 | -5.9 | -3.9 | -5.2 | -5.3 | -5.8 | -6.3 | -4.9 | -6.2 | -6.7 | -5.5 | 1.5  | -6.6 | -6.4 | -6.2 | -6.8 | -7.1 | -6.9 | -7.3 | -7.2 | -7.4 | 1.73 |      |
| ZINC71890712   | -6.9 | -5.7 | -4.3 | -4.8 | -6.6 | -7.1 | -6.1 | -4.4 | -7.7 | -2.2 | -7.2 | -4.9 | -6.6 | -4.2 | -6.6 | -4.2 | -6.2 | -6.2 | -7.6 | -6.1 | -4.4 | -5.7 | -6.4 | -6.2 | -7.5 | -7.8 | -7.2 | -8.1 | -7.9 | -7.6 | 1.43 |      |
| ZINC71890788   | -7.8 | -6   | -6.3 | -6.1 | -7.7 | -5.7 | -6.4 | -6   | -8.4 | -7.1 | -7.3 | -5.6 | -6.4 | -6.6 | -7.6 | -5.5 | -6.8 | -6.6 | -7.8 | -7.4 | -4   | -6.9 | -6.8 | -6.6 | -7.7 | -7.6 | -7.9 | -7.9 | -7.9 | -7.9 | 0.97 |      |
| ZINC71910387_1 | -7.7 | -5.5 | -2.1 | -2.5 | -6.7 | -7.2 | -4.9 | -1.4 | -7.9 | -1.4 | -6.5 | -1   | -6.1 | -1.2 | -6.4 | -1.4 | -5.6 | -6.5 | -7.4 | -6.9 | -4.5 | -4.5 | -7   | -5.1 | -7.3 | -7.1 | -7.3 | -7.7 | -7.2 | -7.7 | 2.34 |      |
| ZINC71915103   | -6   | -5.9 | -1.1 | -0.1 | -6.2 | -6.9 | -6.9 | -0.6 | -8.2 | 0    | -7.2 | 0.6  | -4.7 | 3.5  | -7.3 | -1.2 | -6.6 | -6.5 | -7.1 | -7   | -3.5 | -4.5 | -7   | -5   | -7.6 | -7.2 | -6.5 | -7.4 | -7.1 | -7.8 | 3.13 |      |
| ZINC71915116   | -7.9 | -6   | -1.4 | -1.6 | -7.1 | -6.8 | -5.5 | -0.6 | -7.9 | 8.4  | -7.4 | 1.2  | -3.7 | 2.7  | -6   | 0    | -5.1 | -6.6 | -7.2 | -6.9 | -3.5 | -4.6 | -7.4 | -4.7 | -7.7 | -7.4 | -6.7 | -7.6 | -7.5 | -7.9 | 3.87 |      |
| ZINC71943155   | -7.5 | -5.2 | -3.4 | -2.5 | -7.2 | -6.8 | -5.7 | -3.7 | -8   | -6.3 | -7.8 | -6.8 | -5.9 | -5.2 | -5.3 | -2.2 | -4.6 | -7   | -6.8 | -6.7 | -3.7 | -6.9 | -6.4 | -6.2 | -7.3 | -6.8 | -7.5 | -7.2 | -7.2 | -7.4 | 1.58 |      |
| ZINC71965176   | -7.6 | -6.1 | -5.4 | -5.7 | -6.9 | -6.5 | -5.8 | -5.6 | -7.7 | -5.6 | -6.9 | -5.7 | -6.6 | -6.9 | -7.2 | -5.1 | -6   | -6.9 | -7   | -7.1 | -4.5 | -6.5 | -7.3 | -6.6 | -7.9 | -7.2 | -7.5 | -7.5 | -7.3 | -7.8 | 0.88 |      |
| ZINC71965540   | -7.7 | -4.8 | -3.6 | -1.8 | -6.7 | -6.7 | -5.9 | -3.5 | -8   | -4.7 | -6.6 | -0.9 | -6.2 | -2.8 | -6   | -2.5 | -5.9 | -6.1 | -7.2 | -6.2 | -3.6 | -5.9 | -6.8 | -5.7 | -7.6 | -7.1 | -7.5 | -7.5 | -7.6 | -7.7 | 1.93 |      |
| ZINC72144813   | -7.6 | -4.3 | -4   | -4.7 | -6.6 | -6.5 | -5.6 | -3.4 | -7.6 | -4.3 | -6.6 | -2.6 | -5.4 | -5.2 | -7   | -2.5 | -5.9 | -6.5 | -7.2 | -7   | -1.1 | -7   | -6.9 | -6.3 | -7.5 | -7.3 | -7.4 | -7.5 | -7.4 | -7.8 | 1.78 |      |
| ZINC72145392   | -6   | -5.5 | -5.8 | -5.4 | -6   | -5.3 | -5.7 | -5.9 | -6.6 | -5.4 | -6.3 | -5.7 | -5.5 | -6   | -6   | -5.3 | -6.4 | -6.2 | -6.1 | -6.4 | -4.7 | -6.4 | -6.2 | -6.6 | -6.4 | -6.4 | -6.3 | -6.3 | -6.9 | -7.2 | 0.53 |      |
| ZINC72149548   | -7.5 | -4.3 | -0.4 | -0.8 | -6.8 | -6.9 | -5.4 | -1.6 | -7.8 | 0.3  | -6.8 | 7.1  | -5.7 | -1.8 | -7   | 1.9  | -5.2 | -7.2 | -7.4 | -6.7 | 7.4  | -5.8 | -6.6 | -5.8 | -8.1 | -7.2 | -7.5 | -7.3 | -7.4 | -7.8 | 4.22 |      |
| ZINC72149956   | -7.9 | -4.3 | -4.2 | -4   | -6.4 | -6.5 | -5.7 | -4.3 | -7.4 | -2.6 | -6.9 | -0.8 | -5.8 | -5.3 | -6.3 | 2.5  | -5.7 | -6.1 | -7.5 | -6.7 | -3.9 | -6.3 | -6.6 | -5.9 | -7.2 | -6.7 | -7.5 | -7.5 | -7.6 | -8.1 | 1.77 |      |
| ZINC72164992   | -7.8 | -6.2 | -3.6 | -3.6 | -7.2 | -7.2 | -6.6 | -2.9 | -8.2 | -1.6 | -7.5 | 1.6  | -7   | -0.4 | -7.9 | 1.4  | -6.5 | -6.7 | -7.6 | -7.4 | -1.2 | -5.9 | -7.4 | -6.7 | -7.4 | -7.5 | -7.6 | -7.6 | -7.6 | -8   | 2.99 |      |
| ZINC72179988_1 | -7.7 | -5.4 | -5.5 | -5   | -5.7 | -5.7 | -6.8 | -3.6 | -6.6 | -5.4 | -5.6 | 1.1  | -5.1 | -5.7 | -5.2 | -0.7 | -4.9 | -6.8 | -6.1 | -5.6 | 1.6  | -6.7 | -6.7 | -6.3 | -7.8 | -7.1 | -7.9 | -7.5 | -7.8 | -8.2 | 2.38 |      |
| ZINC72231956   | -7.5 | -5   | -4.4 | -3.3 | -6.8 | -6   | -5.8 | -3.7 | -7.6 | -3.5 | -6.8 | -0.5 | -6.4 | -5.3 | -6.5 | -2.2 | -5.2 | -6   | -7.1 | -7.1 | -2.1 | -6.6 | -6.5 | -6.3 | -7.6 | -7   | -7.6 | -7.2 | -7.3 | -7.4 | 1.88 |      |
| ZINC72237591_1 | -7.6 |      |      |      |      |      |      |      |      |      |      |      |      |      |      |      |      |      |      |      |      |      |      |      |      |      |      |      |      |      |      |      |

|                |      |      |      |      |      |        |      |      |      |      |      |      |      |      |      |      |      |      |      |      |      |      |      |      |      |      |      |      |      |      |      |
|----------------|------|------|------|------|------|--------|------|------|------|------|------|------|------|------|------|------|------|------|------|------|------|------|------|------|------|------|------|------|------|------|------|
| ZINC74267886_1 | -7.7 | -4.7 | -4.3 | -2.9 | -6.6 | -5.8   | -5.4 | -5.5 | -7.8 | -4.5 | -6.1 | -4.5 | -5.7 | -5.5 | -6.3 | -4.5 | -6.6 | -5.9 | -6.9 | -6.3 | -3   | -7.3 | -7.1 | -6.7 | -7.1 | -7.1 | -6.7 | -7.7 | -7.5 | -7.5 | 1.34 |
| ZINC74276683   | -7.6 | -5.2 | -5.4 | -5.1 | -6.6 | -6.3   | -5.8 | -5.7 | -7.5 | -6.5 | -6.2 | -4.8 | -6.4 | -5.9 | -5.8 | -5.5 | -5.3 | -6.3 | -6.3 | -5.9 | -5.7 | -7   | -6.6 | -7.2 | -6.9 | -7.1 | -7.2 | -7.3 | -7.4 | -7.3 | 0.80 |
| ZINC74377115   | -7.9 | -5.5 | -5.8 | -5.4 | -7.5 | -6.7   | -6.9 | -5.7 | -8.1 | -6.2 | -7.7 | -5.5 | -5.7 | -6.4 | -6.9 | -5.6 | -6.7 | -7.1 | -6.3 | -6.8 | -4.5 | -7   | -7   | -7.3 | -7.6 | -7.2 | -7.5 | -7.7 | -7.7 | -7.9 | 0.93 |
| ZINC74604536   | -7.5 | -6.5 | -4.2 | -1.1 | -7.2 | -6.9   | -4.8 | -2   | -8.3 | -1.5 | -7.7 | -1.8 | -5.4 | -4.1 | -6.4 | 1.9  | -6.6 | -6.8 | -6.8 | -5.7 | -2.4 | -6.2 | -6.3 | -6   | -7.5 | -7.4 | -7.1 | -8   | -7.6 | -7.9 | 2.53 |
| ZINC7489966    | -7.6 | -4.8 | -3.4 | -3.7 | -6.9 | -5.9   | -5.6 | -4.9 | -7.4 | -4.9 | -7.1 | -4.8 | -6.1 | -5   | -6.1 | -3.7 | -6.3 | -6.5 | -6.8 | -6.4 | -5.1 | -6   | -6.7 | -6.2 | -6.7 | -6.9 | -7.7 | -7.3 | -7.4 | 1.19 |      |
| ZINC75091920   | -7.8 | -5.9 | -4.8 | -3.5 | -6.7 | -6.5   | -6.5 | -4.6 | -8.7 | -5.2 | -7.1 | -4.1 | -6.1 | -5.2 | -6.1 | -3   | -5.8 | -6.5 | -7.3 | -6.2 | -3.8 | -7.4 | -7.3 | -7.4 | -7.2 | -7.2 | -7.5 | -7.7 | -7.5 | -8   | 1.45 |
| ZINC75092436   | -7.5 | -5.9 | -6   | -5.2 | -7.1 | -6.5   | -6.1 | -6.6 | -6.6 | -5.3 | -6.9 | -5   | -6   | -7.4 | -7   | -5.5 | -7   | -6.6 | -6.6 | -6.3 | -2   | -5.7 | -6.7 | -6.6 | -6.4 | -7.2 | -6.9 | -7.2 | -7.2 | -7.5 | 1.08 |
| ZINC75136578   | -7.7 | -5.1 | -4.4 | -4.5 | -8   | -7.6   | -7   | -4.9 | -8.6 | -5.4 | -7.8 | -4.5 | -5.5 | -5.1 | -7   | -3.8 | -6.6 | -6.7 | -7.5 | -7.1 | -4   | -5.9 | -6.7 | -7.1 | -7.4 | -7.5 | -7.7 | -7.8 | -7.7 | -7.7 | 1.39 |
| ZINC75136689   | -7.5 | -4.8 | -4.1 | -3.7 | -7.1 | -6.5   | -5   | -4.6 | -8.2 | -4.9 | -7.1 | -4.7 | -5.8 | -5.1 | -5.9 | -1.5 | -5.7 | -6   | -6.4 | -5.8 | -4.6 | -6.6 | -6.9 | -7   | -7   | -6.7 | -7.1 | -7.6 | -7.2 | -7.7 | 1.45 |
| ZINC75163949   | -7.6 | -5.8 | -3   | -3.7 | -7.2 | -6.9   | -7.2 | -0.3 | -8.5 | -1.9 | -7.5 | -1.5 | -6.4 | 5.6  | -7.2 | -0.2 | -5.6 | -6.3 | -7.5 | -6.9 | -2.7 | -5.6 | -7.1 | -4.7 | -7.6 | -7   | -7.4 | -7.6 | -7.2 | -7.8 | 3.14 |
| ZINC75165644   | -7.7 | -6.5 | -3.9 | -4.2 | -6.8 | -6.7   | -6.2 | -4.7 | -7.5 | -4.4 | -7.6 | -4.5 | -6.4 | -4.9 | -7   | -3.8 | -6.6 | -6.4 | -7.2 | -6.9 | -5.1 | -7.1 | -6.4 | -7   | -7.3 | -7.2 | -6.9 | -7.9 | -7.6 | -7.9 | 1.27 |
| ZINC75252423   | -7.7 | -2.3 | -1.3 | 2.4  | -6.1 | -6.5   | -3.9 | -1.6 | -6.7 | -3.1 | -5.9 | -3   | -5.9 | -4.4 | -6.1 | 2.9  | -4.9 | -6   | -6.9 | -6.6 | -1.8 | -6.6 | -7.3 | -5.4 | -7.8 | -7.5 | -7.9 | -7.8 | -8   | 2.93 |      |
| ZINC75346770   | -7.5 | -4.7 | -0.6 | -3.7 | -6.7 | -6.2   | -6.1 | -0.4 | -8.1 | -2.2 | -6.4 | 3.4  | -6.5 | 0.9  | -6   | -1.9 | -5.5 | -6.2 | -7   | -6.3 | -3.6 | -5.7 | -7.5 | -5.4 | -7.1 | -7   | -7.4 | -7.5 | -7.4 | -7.7 | 2.88 |
| ZINC75351807_1 | -7.7 | -4.9 | -3.4 | -1.3 | -6.4 | -6.5   | -6.9 | -1.2 | -7.7 | -2.5 | -7.3 | -2.8 | -7.2 | -0.5 | -6.5 | -2.3 | -6.1 | -6   | -7.6 | -7.1 | -4.4 | -5.8 | -6.5 | -4.7 | -7   | -7.4 | -7.1 | -7.5 | -7.6 | -7.9 | 2.24 |
| ZINC75352539   | -7.7 | -4.2 | -4.4 | -3.7 | -6.8 | -6.5   | -4.3 | -4.7 | -6.8 | -3.9 | -5.9 | -1.6 | -5   | -5.3 | -5.3 | -3.1 | -5.1 | -5.3 | -7.3 | -6   | -5.1 | -6.9 | -6.7 | -7.6 | -7.3 | -7.1 | -6.6 | -7.1 | -6.8 | -7   | 1.50 |
| ZINC75574190_1 | -7.1 | -5.8 | -3.6 | -4.6 | -6.9 | -6.4   | -6.5 | -2.8 | -8.3 | -2.3 | -7.1 | -3.4 | -6.9 | -1.6 | -7   | -2.6 | -5.4 | -6.4 | -7.3 | -6.7 | -4   | -6.1 | -6.9 | -5.2 | -8.2 | -6.8 | -7.3 | -7.4 | -7.2 | -7.8 | 1.87 |
| ZINC75609973   | -7.5 | -5   | -4.1 | -3.2 | -7.4 | -6.9   | -6.4 | -2.6 | -7.6 | -4.1 | -7.2 | -3.2 | -6.7 | -1.3 | -7   | -2.1 | -5.7 | -7.5 | -7.4 | -7.3 | -4.1 | -6.7 | -7.3 | -5.1 | -7.6 | -6.9 | -7.3 | -7.1 | -7.1 | -7.4 | 1.90 |
| ZINC75822664   | -7.6 | -5.8 | -6   | -5.7 | -7.2 | -6.6   | -5.9 | -6.3 | -6.9 | -5.7 | -6   | -6.1 | -5.1 | -6.7 | -5.9 | -5.4 | -6.3 | -6.6 | -7   | -6.7 | -4.7 | -7.6 | -6.7 | -6.2 | -6.2 | -7.5 | -6.6 | -7.5 | -7.6 | -7.4 | 0.77 |
| ZINC76019388   | -7.5 | -5.1 | -4.3 | -5.4 | -6.8 | -6.7   | -4.8 | -5.2 | -5.8 | -4.6 | -6.6 | -4.9 | -5.2 | -5.7 | -6.2 | -4.3 | -4.9 | -6.5 | -7.6 | -7   | -2.9 | -5.3 | -6.9 | -7.2 | -7.3 | -7.2 | -7.3 | -7.5 | -7.4 | -7.5 | 1.25 |
| ZINC76101674   | -7.7 | -5.4 | -5.9 | -4.3 | -7.1 | -5.9   | -6.5 | -4.1 | -7.7 | -4.6 | -6.6 | -4.3 | -7.2 | -5.5 | -6.8 | -4.3 | -6   | -6.5 | -6.7 | -6.3 | -2.7 | -6.6 | -7.6 | -6.5 | -7.2 | -7.4 | -7.4 | -8   | -7.8 | -8   | 1.36 |
| ZINC76103160   | -6.2 | -5.5 | -3.6 | -3.7 | -7.3 | -6.9   | -7   | -4.2 | -8.9 | -3.3 | -7.9 | -3.1 | -6.1 | -4.5 | -7.4 | -3.7 | -6.2 | -6.8 | -7.3 | -7.1 | -3.4 | -6.8 | -7.3 | -6   | -7.4 | -7.1 | -7.3 | -7.5 | -7.3 | -7.6 | 1.65 |
| ZINC76193355   | -7.7 | -5.4 | -3.3 | -3.7 | -7.2 | -6.6   | -6.3 | -4.5 | -7.8 | -5.2 | -6.7 | -5.9 | -5.9 | -5.2 | -6.4 | -5.1 | -5.8 | -7.1 | -7.4 | -6.7 | -4.4 | -7.2 | -6.7 | -6.5 | -7.4 | -7.4 | -7.3 | -7.8 | -7.8 | -7.7 | 1.26 |
| ZINC76337680   | -7.5 | -6.3 | -5.6 | -6.1 | -7.3 | -7.4   | -6.7 | -6.5 | -8.4 | -5.3 | -7.4 | -5.9 | -6   | -6.6 | -5.9 | -5.5 | -6.5 | -6.7 | -7   | -6.7 | -4.2 | -6.7 | -6.9 | -6.7 | -7.3 | -7.2 | -7.6 | -7.4 | -7.5 | -7.6 | 0.86 |
| ZINC76506741   | -7.6 | -4.3 | -2.6 | -3   | -7.2 | -5.4   | -5   | -3.6 | -7   | -4.4 | -5.9 | -0.4 | -5.2 | -4.6 | -6   | -2.8 | -5.7 | -5.6 | -6.3 | -6   | -1   | -6.1 | -7.2 | -5.7 | -7.2 | -6.8 | -7.2 | -7.6 | -7.5 | -7.9 | 1.96 |
| ZINC76636798   | -7.9 | -4.1 | -1.8 | -1.2 | -6.9 | -6     | -5.9 | -2   | -7.7 | 1.1  | -6.7 | -3.2 | -6.1 | -4   | -7   | -0.2 | -5.4 | -6.1 | -6.8 | -7.2 | -4.3 | -6.6 | -8.1 | -5.8 | -7.6 | -7.2 | -7.4 | -7.4 | -7.3 | -7.4 | 2.48 |
| ZINC76640416   | -7.5 | -5.2 | -5.5 | -5.5 | -7.1 | -6.8   | -6.6 | -5.4 | -7.8 | -5.1 | -7.1 | -5   | -6.3 | -5.9 | -7   | -5.1 | -6.2 | -6.4 | -7.3 | -7.1 | -3.6 | -6.6 | -6.1 | -6.4 | -7.7 | -7   | -7.4 | -7.4 | -7.3 | -7.5 | 1.01 |
| ZINC76641599   | -7.6 | -4.5 | -2.8 | -3.6 | -7.1 | -6.8   | -5.1 | 1    | -8.3 | -1.7 | -6.7 | -3.8 | -6.5 | 1.5  | -6.5 | 0.7  | -4.6 | -6.7 | -7.6 | -7.2 | -4.3 | -4.9 | -7   | -4.8 | -7.9 | -7.2 | -7.5 | -7.2 | -7.5 | -7.7 | 2.73 |
| ZINC7680981    | -7.8 | -6.6 | -2.8 | -4.4 | -7.3 | -6.7   | -7.4 | -1.4 | -9.1 | 0.8  | -7.4 | -1.1 | -8.1 | -1.4 | -7.5 | -1.9 | -6.4 | -6.4 | -7.6 | -6.9 | -3.8 | -6.1 | -7.1 | -5   | -7.3 | -7.1 | -7   | -7.4 | -7.4 | -7.6 | 2.54 |
| ZINC77178333   | -7.5 | -5.3 | -3.9 | -4   | -6.9 | -6.7   | -6.1 | -4.3 | -7.1 | -4.1 | -7.2 | -3.3 | -6.1 | -4.5 | -6.2 | -3.5 | -5.2 | -6.2 | -7.4 | -6.8 | -4.7 | -6.1 | -6.4 | -6.3 | -7.4 | -7.1 | -7   | -7.5 | -7.3 | -7.6 | 1.36 |
| ZINC77197412   | -7.5 | -5.5 | -3.8 | -3.5 | -7.1 | -6.6   | -6.3 | -0.8 | -8.7 | -1.5 | -6.8 | -4   | -7.2 | -0.4 | -6.7 | -2   | -6.1 | -6.9 | -7.2 | -5.9 | -4.9 | -5.9 | -6.9 | -5.1 | -7.5 | -7   | -7   | -7.4 | -7.3 | -7.7 | 2.17 |
| ZINC77406211   | -7.4 | -4   | -2.9 | -3.4 | -7.3 | -6.7   | 4    | -3   | -8   | -1.9 | -7.1 | 3.4  | -4.2 | -4.9 | -6.1 | -2.6 | -5.8 | -6.2 | -7.2 | -7.1 | -3.4 | -6.8 | -6.9 | -6.1 | -6.8 | -7.2 | -7.4 | -7.3 | -7.3 | -7.6 | 2.46 |
| ZINC77406212   | -6.9 | -3.5 | -3.3 | 0.4  | -7.1 | -6.8   | -3.8 | -3.1 | -7.7 | -3.1 | -6.3 | -3.5 | -5.4 | -3.2 | -5.6 | -1.1 | -4.6 | -6.3 | -6.7 | -6.4 | -4.6 | -6.1 | -6.1 | -6.9 | -6.8 | -7.1 | -7   | -7.1 | -6.8 | -7.3 | 2.02 |
| ZINC77424486   | -5.5 | -5   | -5.4 | -4.8 | -5.7 | -5.8   | -4.1 | -4.7 | -7.4 | -4.3 | -6   | -3.7 | -4.3 | -5.8 | -5.3 | -4.5 | -5   | -5.5 | -6.5 | -5.2 | -3.3 | -5.8 | -6.1 | -5.8 | -7.3 | -6.5 | -6.7 | -6.8 | -6.6 | -7.2 | 1.07 |
| ZINC77490853   | -7.6 | -6.4 | -5.9 | -5.7 | -7   | -6.9   | -6.2 | -5.8 | -8.3 | -6.1 | -7.2 | -5.3 | -5.2 | -6.9 | -6.2 | -5.1 | -6.4 | -6.4 | -6.5 | -6.7 | -2.2 | -6.6 | -6.5 | -6.7 | -7.9 | -7   | -7.5 | -7.5 | -7.4 | -7.9 | 1.15 |
| ZINC77504983   | -7.4 | -4.5 | -4.7 | -4.4 | -6.4 | -5.9   | -4.8 | -4.7 | -7.3 | -4   | -6.7 | -2.6 | -5.6 | -4.6 | -5.9 | -2.8 | -6.4 | -5.7 | -6   | -6.3 | -3.7 | -6.6 | -6.6 | -6.2 | -7   | -6.6 | -7.2 | -6.8 | -6.8 | -7.3 | 1.33 |
| ZINC77541870   | -7.6 | -4.5 | -3.7 | -2.3 | -7.1 | -6.7   | -4.2 | -3.5 | -7.3 | -4.5 | -7.1 | 0.7  | -4.8 | -4.5 | -5.6 | -1.6 | -4.8 | -6.3 | -7.3 | -7.1 | -4.9 | -6.2 | -6   | -6.7 | -7.1 | -6.8 | -7.8 | -7.1 | -7   | -7.3 | 2.01 |
| ZINC77541870_1 | -7.6 | -4.4 | -3.9 | -2.3 | -7.2 | -6.9   | -4.2 | -4   | -7   | -3.4 | -7.1 | -4.2 | -5.5 | -4.6 | -5.6 | -1.4 | -4.8 | -5.9 | -6.7 | -7   | -5   | -5.9 | -5.9 | -6.7 | -7.1 | -6.7 | -7.8 | -7.1 | -7   | -7.3 | 1.65 |
| ZINC77675189   | -7.6 | -4.4 | -5.4 | -4.9 | -6.9 | -6.5   | -5.5 | -4.6 | -7.7 | -3.9 | -6.9 | -4.9 | -5.6 | -4.9 | -6.6 | -3.1 | -5.3 | -6.5 | -6.6 | -6.4 | -3.3 | -6.2 | -6.8 | -5.9 | -8   | -7.1 | -7.7 | -7.6 | -7.4 | -7.9 | 1.37 |
| ZINC77759388   | -7.9 | -4.4 | -3.1 | 1.2  | -7.3 | -6.7   | -5.9 | -1.3 | -8   | -1.8 | -6.7 | -3.2 | -7.3 | -1.5 | -6.5 | -0.3 | -5.9 | -6.2 | -7   | -7.4 | -5.3 | -6.4 | -7.2 | -6.2 | -7.3 | -7.3 | -7.8 | -8.2 | -7.7 | -8.1 | 2.59 |
| ZINC77759388_1 | -7.8 | -4.7 | -3   | -0.3 | -7.3 | -6.6   | -5.6 | 0.4  | -8   | -3.5 | -6.2 | -1.9 | -7.2 | -3.5 | -6.7 | -2.5 | -6   | -6.2 | -6.5 | -7.1 | -2.2 | -6.4 | -7.3 | -6.6 | -7.4 | -7.5 | -7.8 | -8.1 | -7.7 | -7.8 | 2.42 |
| ZINC77816379   | -7.5 | -6.5 | -2.9 | -1.6 | -7.5 | -6.9   | -5.4 | -2   | -8.3 | -2.4 | -7.6 | -1.6 | -6.9 | -1.3 | -7.4 | -3   | -6.2 | -6.2 | -7.8 | -6.6 | -3.9 | -6.2 | -7.1 | -5.2 | -7.5 | -7.2 | -7.4 | -7.5 | -7.6 | -7.6 | 2.25 |
| ZINC77817995   | -7.5 | -6.3 | -4.3 | -4.1 | -7.3 | -7.2   | -6.7 | -3.7 | -7.9 | -3.4 | -7.7 | -1.7 | -6.6 | -3   | -6.8 | -3.8 | -6   | -7.1 | -7.3 | -7   | -0.7 | -5.1 | -7.1 | -5.6 | -8.3 | -7   | -7.4 | -7.5 | -7.2 | -7.9 | 1.98 |
| ZINC77860679   | -7.6 | -4.4 | -1.9 | -1.7 | -6.5 | -6     | -4.7 | 0.3  | -7.4 | -1   | -6.7 | 3    | -5.3 | 0.5  | -6.4 | 0.5  | -6.4 | -5.5 | -6.5 | -5.9 | -2.8 | -6.2 | -6.2 | -4.8 | -7   | -6.3 | -7.1 | -6.8 | -6.7 | -7.3 | 2.89 |
| ZINC77872650   | -7.6 | -3.9 | -3.3 | -2.3 | -7   | -6.7   | -6.1 | -1.2 | -7.8 | -2.3 | -7.6 | -2.3 | -6.3 | -0.2 | -7.2 | -0.6 | -5.1 | -6.4 | -7.7 | -7.1 | -3.8 | -6.6 | -6.6 | -4.4 | -7.5 | -7.3 | -6.3 | -7.2 | -7.2 | -7.4 | 2.37 |
| ZINC77876413   | -7.4 | -5.4 | -3.8 | -2.6 | -6.8 | -6.2   | -6   | -1.9 | -7.2 | -3.3 | -7.2 | -2.5 | -6.5 | 0.5  | -6.1 | -0.8 | -5.3 | -6   | -7.2 | -6.7 | -1.7 | -3.7 | -6.3 | -6.1 | -6.1 | -6.2 | -6.7 | -6.8 | -6.4 | -6.9 | 2.15 |
| ZINC7788774    | -7.6 | -5.4 | -3.8 | 1.1  | -7.2 | -6.7   | -5.5 | -1.4 | -8   | -3.4 | -7.4 | -1.2 | -6.1 | 0    | -6.2 | 0.7  | -5.2 | -6.4 | -7.7 | -7.3 | -3.7 | -7   | -6.6 | -4.5 | -7.5 | -7.3 | -6.5 | -7.3 | -7.5 | -7.5 | 1.59 |
| ZINC77890212   | -7.6 | -5.6 | -4.2 | -3   | -6.8 | -6.6   | -5.7 | -3.2 | -7.9 | -4.1 | -6.6 | -3.9 | -6.6 | -4.4 | -6.4 | -3.1 | -6.1 | -6.6 | -6.9 | -6.5 | -3.7 | -6.1 | -7.1 | -5.8 | -7.7 | -7   | -7.5 | -7.5 | -7.3 | -7.7 | 1.53 |
| ZINC77907129   | -7.6 | -5.1 | -4.1 | -3.2 | -6.6 | -6.1</ |      |      |      |      |      |      |      |      |      |      |      |      |      |      |      |      |      |      |      |      |      |      |      |      |      |

|                |      |      |      |      |      |      |      |      |      |      |      |      |      |      |      |      |      |      |      |      |      |      |      |      |      |      |      |      |      |      |      |
|----------------|------|------|------|------|------|------|------|------|------|------|------|------|------|------|------|------|------|------|------|------|------|------|------|------|------|------|------|------|------|------|------|
| ZINC79992215   | -7.7 | -4.7 | -3.6 | -2.3 | -6.6 | -5.8 | -5.1 | -0.8 | -7.3 | -0.5 | -6.2 | -2   | -6.1 | -1.4 | -6   | 1    | -5.5 | -6.1 | -6.3 | -5.5 | -5   | -4.7 | -7.2 | -5   | -7.3 | -6.7 | -7   | -7.3 | -7.2 | -7.8 | 2.37 |
| ZINC80052049_1 | -7.9 | -3.9 | -0.7 | -2.4 | -6.5 | -6.2 | -5.9 | -1.2 | -8.1 | -1.5 | -6.4 | -2.1 | -6.5 | 2.6  | -6.7 | -1   | -5.6 | -6.3 | -6.8 | -7.1 | -4.5 | -5   | -7   | -5.4 | -7.5 | -7.3 | -7.4 | -7.6 | -7.4 | -8.2 | 2.74 |
| ZINC80132924   | -7.5 | -5.5 | -5.5 | -5.4 | -6.3 | -6.2 | -6.2 | -5.3 | -8.1 | -5.6 | -7   | -5.3 | -5.3 | -5.7 | -7   | -5   | -5   | -6.7 | -7   | -6.1 | -4.4 | -6.4 | -6.3 | -6.8 | -7   | -6.5 | -7.2 | -7.1 | -6.4 | -7.4 | 0.88 |
| ZINC80410502_1 | -7.5 | -4.7 | -2.2 | 2    | -6.8 | -6.2 | -5.5 | -1.3 | -8.3 | -1.9 | -6.7 | -2.7 | -6.4 | 0.4  | -7   | -1.6 | -5.5 | -6.3 | -6.7 | -6.5 | -4.8 | -6   | -7.7 | -5.6 | -7.7 | -6.9 | -7.4 | -7.5 | -7.2 | -7.8 | 2.66 |
| ZINC81456029   | -7.5 | -5.4 | -5.4 | -4.9 | -7   | -6.6 | -5.7 | -6.2 | -6.5 | -5.7 | -6.8 | -5.8 | -5.7 | -6.1 | -6.6 | -5.6 | -6.3 | -6.7 | -6.9 | -6.7 | -3.3 | -5.8 | -6.2 | -6.6 | -7.5 | -6.9 | -7.5 | -7.2 | -7.3 | -7.7 | 0.93 |
| ZINC82087786   | -7.5 | -5.7 | -3   | -4   | -7.4 | -6.3 | -6.6 | -2.7 | -8.1 | -3.4 | -7.3 | 0.2  | -6.7 | -1.5 | -7   | -2.8 | -6.1 | -6.4 | -7.5 | -6.7 | -4.5 | -4.5 | -6.5 | -5   | -8.1 | -7   | -7.3 | -7.5 | -7.1 | -7.8 | 2.13 |
| ZINC82140082   | -6.5 | -6.1 | -4.1 | -2   | -7.7 | -6.7 | -6.3 | -4.4 | -7.6 | -4.7 | -7.3 | -4   | -7.5 | -5.9 | -7.3 | -5.4 | -6.3 | -6.9 | -7.2 | -6.6 | -4.5 | -6.1 | -6.9 | -7.2 | -7.2 | -7.4 | -7.8 | -7.2 | -7.8 | -7.5 | 1.41 |
| ZINC84027103   | -7.5 | -4.5 | -5.3 | -4.2 | -5.9 | -7   | -4.6 | -4.3 | -7.8 | -4.7 | -6.6 | -1.7 | -4.4 | -5.9 | -5.6 | -2.8 | -6.3 | -6.5 | -7.7 | -7   | -1.8 | -7.1 | -6.7 | -6.4 | -6.9 | -6.8 | -6.9 | -6.9 | -6.8 | -6.9 | 2.01 |
| ZINC84027103_1 | -7.9 | -5.1 | -4.3 | -3.6 | -6.8 | -7   | -4.6 | -4.3 | -7.4 | -3.6 | -6.9 | -3.8 | -4.5 | -5.5 | -6.9 | -1.3 | -4.2 | -5.3 | -7.2 | -7.9 | -3.1 | -6.3 | -7.2 | -6.8 | -7.6 | -7.7 | -8.1 | -7.7 | -7.9 | -8   | 1.84 |
| ZINC84052259   | -7.8 | -5.9 | -4.5 | -3.5 | -7.5 | -7   | -6.5 | -3.4 | -8   | -4   | -7.3 | -3.7 | -7   | -4.8 | -6.8 | -2.7 | -5.6 | -6   | -8   | -7   | -3.8 | -6.1 | -7.1 | -6.3 | -8   | -7.5 | -7.4 | -7.8 | -7.6 | -7.9 | 1.65 |
| ZINC84111483   | -7.5 | -5.5 | -3.9 | -3.7 | -7.6 | -7.1 | -6.3 | -2.7 | -3.6 | -7.7 | -0.4 | -6.8 | -0.9 | -7   | -2.6 | -6.1 | -6.5 | -7.9 | -6.8 | -4.3 | -5.1 | -7.2 | -5.1 | -6.8 | -7.2 | -6.6 | -7.7 | -7.1 | -7.5 | 2.13 |      |
| ZINC84230398_1 | -7.8 | -4.8 | -4.5 | -3.2 | -7.2 | -7.1 | -5.4 | -4.5 | -7.7 | -4   | -6.2 | -1.4 | -4.7 | -6.2 | -5.2 | -0.1 | -5.6 | -6.9 | -7.6 | -6.3 | -3.4 | -6.7 | -7.4 | -5.5 | -6.9 | -7.3 | -7.3 | -8   | -7.4 | -7.8 | 1.95 |
| ZINC84280838   | -5.9 | -5.2 | -5.9 | -5.2 | -7.4 | -7.4 | -4.7 | -5.6 | -7.5 | -5.3 | -5.5 | -5.6 | -6.3 | -5.7 | -5.9 | -5.3 | -5.4 | -6.3 | -5.7 | -5.3 | -1   | -6.7 | -7.2 | -6.1 | -7.7 | -6   | -7.3 | -7.2 | -7.3 | -7.6 | 1.30 |
| ZINC84445850   | -7.2 | -5.3 | -6   | -6   | -7.6 | -6.8 | -5.2 | -5.5 | -7.3 | -5.1 | -7.3 | -6   | -5.7 | -6.2 | -6.1 | -4.8 | -5.9 | -6.8 | -7.4 | -6.2 | -3.9 | -7.2 | -7   | -6.3 | -7.2 | -7   | -7.4 | -7.4 | -7.2 | -7.5 | 0.95 |
| ZINC84560008   | -7.6 | -6   | -1.4 | -2.7 | -6.9 | -6.2 | -5.5 | -4.2 | -6.4 | -3.1 | -7.3 | 1.3  | -5.5 | -3.3 | -6.2 | -2   | -6.3 | -6.4 | -6.6 | -6.4 | -3.3 | -6.8 | -6.6 | -6.7 | -7.8 | -7.4 | -7.7 | -7.2 | -7.5 | -7.8 | 2.24 |
| ZINC85235661   | -7.7 | -4.5 | -4.5 | -3.7 | -6.6 | -5.9 | -6   | -4.3 | -7.4 | -4.9 | -7   | -4   | -7.1 | -5.2 | -6.2 | -3.2 | -6.1 | -5.8 | -6.9 | -6.1 | -4.5 | -7   | -7.4 | -6.9 | -7.7 | -7   | -7.3 | -7.7 | -7.2 | -7.9 | 1.36 |
| ZINC85354046   | -7.6 | -5.8 | -5.1 | -3.7 | -7.5 | -6.9 | -6.1 | -3.6 | -7.8 | -2.4 | -7.6 | -4.7 | -7.1 | -4.8 | -7.1 | -3.3 | -6.4 | -6.4 | -7.4 | -6.8 | -5.7 | -6.5 | -6.4 | -7.2 | -7.4 | -7   | -6.9 | -7.6 | -7.3 | -7.7 | 1.47 |
| ZINC85506025   | -7.9 | -5.9 | -4.4 | -3.4 | -7.6 | -7.1 | -6.7 | -3.8 | -8.2 | -2.1 | -7.8 | -0.2 | -7.2 | -3.3 | -7.8 | -2.4 | -6.5 | -6.6 | -7.3 | -7.2 | -3.3 | -5   | -6.5 | -5   | -7.6 | -7.6 | -7.6 | -7.9 | -7.7 | -7.9 | 2.16 |
| ZINC85524242_1 | -7.3 | -4.8 | -3.4 | -4.8 | -7.1 | -6.9 | -6.9 | -2.8 | -8.1 | -2.9 | -7.3 | -1.6 | -7.3 | -0.5 | -6.8 | -1.5 | -6.6 | -5.9 | -7.4 | -5.4 | -3.8 | -6.2 | -6.4 | -5.4 | -7.5 | -7.2 | -7.1 | -7.7 | -7.3 | -7.5 | 2.11 |
| ZINC86970776   | -7.5 | -5.6 | -4.3 | -3.3 | -7.4 | -6.8 | -7   | -2.7 | -8.1 | -0.1 | -7.5 | -3.3 | -7.1 | -2.6 | -7.4 | -3.5 | -6.6 | -6.6 | -7.5 | -6.4 | -5   | -6   | -6.7 | -5.9 | -7.6 | -7   | -7.2 | -7.3 | -7.3 | -7.6 | 1.99 |
| ZINC87063391   | -7.3 | -4.3 | -2.9 | -3.1 | -6.8 | -6.6 | -5.6 | -1.3 | -6.9 | -2.5 | -6   | -4.4 | -5.5 | -3.4 | -6.3 | 0.8  | -5.3 | -6.1 | -7.6 | -6.3 | -5.2 | -5.9 | -6.4 | -6.3 | -7.8 | -7.3 | -7.7 | -7.3 | -7.4 | -7.8 | 2.10 |
| ZINC87103232   | -7.4 | -6.3 | -3.6 | -4.6 | -7.9 | -6.7 | -6.6 | -5.1 | -8.5 | -5   | -8.2 | -4.9 | -7.5 | -5.5 | -7.3 | -4.6 | -7   | -6.8 | -7.9 | -7.5 | -3.8 | -6.2 | -6.9 | -6.3 | -7.8 | -7.3 | -7.2 | -7.8 | -7   | -7.6 | 1.33 |
| ZINC87103233   | -7.4 | -6.5 | -4   | -2.9 | -7.5 | -7   | -6.5 | -4.4 | -8.3 | -4.7 | -7.8 | -3.6 | -7.1 | -4.4 | -7.3 | -3.9 | -7   | -6.7 | -7.8 | -6.7 | -4.2 | -5.8 | -6.8 | -6.2 | -7.4 | -7.3 | -7.3 | -8   | -7.5 | -7.6 | 1.53 |
| ZINC87166888   | -7.6 | -5.3 | -4.1 | -4.9 | -7.9 | -7.2 | -6.7 | -4.8 | -8.2 | -6   | -7.8 | -4.5 | -7.8 | -5.5 | -7.6 | -5.5 | -7.5 | -6.8 | -7.5 | -6.9 | -3.6 | -6.4 | -6.9 | -6.4 | -7.2 | -7.3 | -7.1 | -7.8 | -7.3 | -7.9 | 1.26 |
| ZINC87323514   | -7.7 | -6.2 | -4.2 | -3.3 | -7.8 | -7.2 | -6.3 | -4   | -8.5 | -3.3 | -7.3 | -5.1 | -6.5 | -4.6 | -6.2 | -2.3 | -5.7 | -5.9 | -7.4 | -6.2 | -4.2 | -7.3 | -6.4 | -6.9 | -7.2 | -6.9 | -7.3 | -7.2 | -7.2 | -7.1 | 1.57 |
| ZINC88254081   | -7.5 | -4.9 | -2.3 | -0.5 | -5.8 | -5.8 | -6.4 | -1.9 | -7.8 | -2.5 | -5.8 | -6.2 | -6.3 | -2.6 | -5.6 | 0.6  | -5.6 | -6   | -6.5 | -6.3 | -4.3 | -5.5 | -6.7 | -5   | -7   | -7.2 | -7.3 | -7.4 | -7.4 | -7.5 | 2.27 |
| ZINC88254703   | -6.5 | -5.5 | -4.4 | -3.1 | -6.6 | -5.9 | -6.3 | -2.9 | -7.7 | -4.6 | -6.6 | -4.7 | -5.9 | -3.6 | -5.8 | -1.1 | -5.7 | -6   | -6.3 | -6.4 | -4.7 | -5.5 | -6.5 | -5.5 | -6.8 | -6.9 | -7.4 | -7.4 | -7.4 | -7.6 | 1.54 |
| ZINC88255151   | -7.1 | -6.7 | -5.4 | -4.7 | -6.8 | -6.3 | -6.3 | -4.4 | -8.4 | -4.9 | -7.2 | -3.6 | -6.3 | -5.8 | -6.7 | -3.3 | -6.6 | -6.3 | -6.7 | -6   | -3.6 | -6.8 | -6.7 | -6.6 | -6.7 | -7.1 | -6.7 | -7.3 | -7.3 | -7   | 1.22 |
| ZINC88255262   | -7.5 | -3.9 | -3.7 | -1.8 | -7.1 | -6.3 | -4.4 | -3.6 | -7.4 | -2.9 | -6.5 | 0.8  | -4.9 | -4   | -6.1 | -2.1 | -5   | -6.7 | -7.2 | -6   | -4.3 | -5.9 | -7.2 | -6.2 | -7.5 | -7.2 | -7.3 | -7.3 | -7.5 | -7.4 | 2.10 |
| ZINC88264474   | -6.8 | -4.5 | -3.3 | 0.6  | -6.2 | -5.9 | -5.3 | -4.3 | -7   | -3.8 | -6.4 | -1.1 | -6.2 | -5.7 | -5.5 | -0.7 | -5   | -6.2 | -6.8 | -6   | -5   | -6   | -7.1 | -5.5 | -7.2 | -6.7 | -7.7 | -7.6 | -7.5 | -7.8 | 2.07 |
| ZINC88338503   | -7.7 | -5.6 | -5.1 | -4.8 | -7.2 | -6.5 | -6.5 | -5.1 | -8.1 | -4.7 | -8.1 | -4.7 | -7.4 | -5.3 | -7.2 | -2.9 | -7   | -7.6 | -7.1 | -6.2 | -3.7 | -6.8 | -6.8 | -6.6 | -7.5 | -6.8 | -7.5 | -7.5 | -7.1 | -7.8 | 1.34 |
| ZINC88363959   | -7.4 | -5.4 | -6.1 | -6.2 | -7.2 | -5.3 | -5.3 | -6.3 | -7.5 | -6.1 | -5.8 | -5.6 | -4.9 | -6.5 | -6.4 | -5.8 | -5.7 | -5   | -6.1 | -5.7 | -4.4 | -7   | -6.1 | -6.5 | -6.1 | -5.8 | -5.9 | -6   | -7.6 | -6   | 0.76 |
| ZINC88390793   | -7.3 | -5.5 | -5.3 | -4.2 | -7   | -6.3 | -6.3 | -4.7 | -8.3 | -5.1 | -7.2 | -2.1 | -7.1 | -5.1 | -7   | -2.7 | -6.1 | -6.2 | -7.3 | -6.8 | -4.5 | -6.3 | -7   | -6.4 | -7.5 | -7.1 | -7.3 | -7.4 | -7.3 | -7.5 | 1.45 |
| ZINC88619514   | -7.7 | -5   | -3.9 | -3.6 | -6.8 | -6.1 | -5.4 | -4.3 | -7.4 | -4.4 | -7.3 | -2.9 | -4.7 | -5.6 | -6.5 | -3.7 | -4.4 | -6.2 | -6.3 | -6   | -2.5 | -5.3 | -7.1 | -6.9 | -6.8 | -7.5 | -6.9 | -7.7 | -7.6 | -6.9 | 1.52 |
| ZINC89204264   | -7.7 | -5.3 | -1.9 | -3.2 | -7.4 | -7.2 | -6.4 | -2.5 | -8.2 | -1.9 | -6.8 | -4.9 | -4.7 | -4   | -6.3 | -2.7 | -5.5 | -6.7 | -7.1 | -6.8 | -4.1 | -5.5 | -6.7 | -5.9 | -7.9 | -7.4 | -7.3 | -8   | -7.8 | -7.7 | 1.93 |
| ZINC89224850   | -7.5 | -4.9 | -5.1 | -4.4 | -6.7 | -6.4 | -5.6 | -5.6 | -7.6 | -5.3 | -7   | -3.8 | -7.3 | -5.5 | -6.2 | -5   | -6   | -6.2 | -6.9 | -6.7 | -5.8 | -6.7 | -6.8 | -6.2 | -7.1 | -7   | -7   | -7.6 | -7.2 | -7.7 | 1.01 |
| ZINC89311881   | -7.5 | -4   | -4.6 | -3.8 | -6.5 | -6   | -4.6 | -5.2 | -8.6 | -5.1 | -6.3 | -3.2 | -5.5 | -4.4 | -6.1 | -3.2 | -6.1 | -6   | -6.8 | -6.9 | -4.2 | -5.6 | -6.5 | -7.1 | -7.6 | -6.9 | -7.6 | -7.4 | -7.2 | -7.6 | 1.44 |
| ZINC89361207   | -5.7 | -4.3 | -2.3 | -3.8 | -6.2 | -5.7 | -3.7 | -3.9 | -7.3 | -3.5 | -6   | 3.1  | -4.6 | -4.5 | -5.6 | -2.2 | -4.8 | -6.3 | -5.9 | -6.2 | -3.5 | -6.2 | -6.7 | -5.5 | -6.5 | -6.8 | -6.5 | -6.7 | -6.4 | -6.6 | 2.06 |
| ZINC89547927   | -7.7 | -4.8 | -2.8 | -2.9 | -6.7 | -5.9 | -6.4 | -3   | -7.7 | -1.6 | -6.9 | -4.5 | -6.2 | -3.3 | -6.7 | -2.2 | -6.3 | -6   | -6.7 | -6.4 | -3.2 | -6   | -6.5 | -5.1 | -7   | -7   | -7.1 | -7.3 | -7   | -7.6 | 1.81 |
| ZINC89574711   | -7.7 | -5.5 | -6   | -4.9 | -6.8 | -7   | -5.3 | -5.4 | -7.7 | -5.5 | -7.7 | -6.1 | -5.9 | -6.3 | -6.4 | -5.2 | -6.1 | -7.1 | -6.9 | -6.4 | -4.6 | -6.6 | -7   | -7   | -8   | -7.2 | -7.9 | -7.8 | -7.6 | -7.9 | 0.99 |
| ZINC89574711_2 | -7.9 | -4.9 | -4   | -1.7 | -7.2 | -7.2 | -5.1 | -2.9 | -8.2 | -4.3 | -6.4 | -5.6 | -6.5 | -5.5 | -6.1 | 0.2  | -6   | -6.1 | -5.6 | -6.1 | -6.1 | -6.1 | -6.8 | -6.7 | -7.5 | -7.9 | -8   | -7.5 | -7.9 | -7.9 | 1.92 |
| ZINC89600776   | -8.1 | -4.8 | -3.8 | -2.7 | -6   | -6.5 | -5   | -4.5 | -7.9 | -4   | -7.2 | 0.8  | -5.1 | -4.9 | -6.1 | -2.8 | -4.9 | -6.2 | -6.8 | -7.3 | -1.9 | -6.5 | -6.5 | -6.7 | -8.3 | -6.7 | -7.8 | -7.3 | -7   | -8   | 2.09 |
| ZINC89620804   | -7.7 | -4.1 | -3.5 | -3   | -7.2 | -7   | -4.9 | -3.6 | -7.7 | -3.7 | -6.9 | -1.6 | -5.5 | -4.8 | -6.5 | 0.2  | -6.3 | -6.3 | -6.5 | -6.3 | -3.4 | -6.1 | -6.4 | -6.4 | -7.6 | -6.9 | -7.9 | -7.6 | -7.5 | -7.9 | 2.03 |
| ZINC89708373   | -7.4 | -4.2 | -1.3 | -0.3 | -6.8 | -6.2 | -5.7 | -2   | -7.2 | -1.3 | -6.6 | -0.4 | -6.1 | -2.3 | -6.7 | 1.9  | -6.6 | -6   | -7.1 | -6.8 | -5   | -5.9 | -7.4 | -5.5 | -7.8 | -7.6 | -7.5 | -7.1 | -7.4 | -7.7 | 2.68 |
| ZINC89707053   | -7.5 | -5.7 | -3.3 | -2   | -6.8 | -6.3 | -5.8 | -2.6 | -7.4 | -2   | -7.2 | 2.8  | -5.4 | 0.1  | -5.9 | -0.7 | -5.5 | -6.2 | -7   | -6.2 | -4.4 | -5.9 | -6.5 | -6.8 | -7.4 | -7   | -7.4 | -7.6 | -7.4 | -7.9 | 2.62 |
| ZINC89785745   | -7.7 | -6.2 | -3.2 | -4.5 | -6.7 | -6.8 | -6.1 | -5.4 | -6.1 | -5.1 | -6.3 | -3.2 | -5.8 | -5.5 | -6.6 | -2.8 | -4.9 | -6.6 | -7.2 | -6.8 | -2.9 | -6.6 | -6.6 | -6.7 | -7.4 | -7.1 | -7.2 | -7.6 | -7.4 | -7.9 | 1.45 |
| ZINC89796705   | -7.1 | -3.6 | -0.8 | -0.2 | -6.7 | -7   | -6.4 | 0.5  | -8.2 | 5.1  | -6.4 | -3   | -4.3 | 1.5  | -4.3 | 1.5  | -5.5 | -6.7 | -6.7 | -6.6 | -1.6 | -6.3 | -6.9 | -5.2 | -7.2 | -7.3 | -7.4 | -7.6 | -7.4 | -8   | 3.46 |
| ZINC89797215   | -6.3 | -4.9 |      |      |      |      |      |      |      |      |      |      |      |      |      |      |      |      |      |      |      |      |      |      |      |      |      |      |      |      |      |

|                |      |      |      |      |      |      |      |      |      |      |      |      |      |      |      |      |      |      |      |      |      |      |      |      |      |      |      |      |      |      |      |      |
|----------------|------|------|------|------|------|------|------|------|------|------|------|------|------|------|------|------|------|------|------|------|------|------|------|------|------|------|------|------|------|------|------|------|
| ZINC92077258   | -7.5 | -4   | -3.3 | -2   | -6.9 | -6.5 | -6.5 | 0.9  | -8.5 | 2.8  | -7   | 4.1  | -6.9 | -2.5 | -6.9 | 0.4  | -7   | -6.8 | -7.6 | -7   | 2.1  | -6.8 | -7.8 | -5.6 | -7.1 | -7.5 | -7   | -8.1 | -7.7 | -7.9 | 3.64 |      |
| ZINC92377242   | -7.5 | -5.9 | -5.6 | -3.9 | -7.2 | -6.8 | -6   | -6.3 | -7   | -5.1 | -6.7 | -5.7 | -5.9 | -6.2 | -6.6 | -5.5 | -6.8 | -6.6 | -6.7 | -6.5 | -3.9 | -5.4 | -7   | -6.4 | -7.4 | -7   | -7.3 | -7.2 | -7.4 | -7.5 | 0.95 |      |
| ZINC92613833   | -7.5 | -3.5 | -1.3 | -3.6 | -6.3 | -5.9 | -6.3 | -3.6 | -8.2 | -3.4 | -7   | 0.2  | -7.3 | -4.3 | -6.3 | -2.9 | -6.9 | -6   | -6.4 | -6.5 | -4.6 | -7.1 | -7   | -6.4 | -7.1 | -6.9 | -7.2 | -7.4 | -7.1 | -7.9 | 2.04 |      |
| ZINC92703695_2 | -7.6 | -5.1 | -3.2 | -1.6 | -6.5 | -6.2 | -5.3 | -3.4 | -7.5 | -2.8 | -6.8 | -1.7 | -5.7 | -4.8 | -6   | -2.8 | -5.6 | -5.8 | -6.7 | -6.2 | -3   | -6.7 | -6.3 | -5.9 | -6.8 | -6.5 | -7.2 | -7   | -6.8 | -7.1 | 1.75 |      |
| ZINC93151449   | -7.5 | -4.8 | -5.7 | -5.7 | -7   | -6.7 | -5   | -6.6 | -7.1 | -5.8 | -6   | -5.6 | -4.9 | -6.8 | -6.3 | -5.2 | -6.6 | -6.2 | -6.8 | -7.2 | -0.7 | -6.7 | -6.7 | -6.2 | -6.5 | -7.3 | -7   | -7.5 | -7.3 | -7.4 | -7.5 | 1.33 |
| ZINC93638077   | -7.6 | -6   | -5.3 | -4.8 | -5.9 | -5.5 | -4.8 | -5.8 | -7.1 | -5   | -5.7 | -4.9 | -5.3 | -5.7 | -5.4 | -5.4 | -5.5 | -5.9 | -6.4 | -6.1 | -2.8 | -7.6 | -6.8 | -7.1 | -6.5 | -7.2 | -7   | -6.7 | -7.3 | -7.2 | 1.06 |      |
| ZINC9367717    | -7.4 | -6.2 | -2.9 | -4.1 | -8   | -6.2 | -7.1 | -2.6 | -7.5 | -2   | -7.9 | -0.4 | -7.6 | -1.5 | -6.8 | -2.9 | -5.8 | -6.8 | -7.9 | -6.5 | -3.5 | -6.1 | -6.5 | -5.1 | -7.7 | -7.2 | -6.4 | -7.8 | -7.4 | -8   | 2.22 |      |
| ZINC9375640_1  | -7.5 | -4.2 | -3.3 | -1.9 | -7.5 | -6   | -4.1 | -1.7 | -7.7 | -0.5 | -7.1 | -2.7 | -5.1 | -2.8 | -5.9 | 2.3  | -5.3 | -6.9 | -6.8 | -6.3 | -2.9 | -6.9 | -6.9 | -5.1 | -6.8 | -7.2 | -7.3 | -7.2 | -7.4 | -7.4 | 2.51 |      |
| ZINC9383112_1  | -7.5 | -4.5 | -0.4 | 0.3  | -7.4 | -7.2 | -5   | -1.9 | -7.8 | -1.7 | -7.9 | -1.7 | -6.3 | -1.8 | -6.1 | 2.1  | -5.1 | -7.5 | -7.8 | -7.3 | -3.2 | -6.5 | -6.8 | -5.1 | -7   | -7.1 | -7.1 | -7.4 | -7.3 | -7.4 | 2.84 |      |
| ZINC93977232   | -7.3 | -6.4 | -5.6 | -5.8 | -6.7 | -6.7 | -6   | -6.5 | -8   | -4.9 | -6.8 | -6.3 | -6.3 | -6.7 | -5.7 | -5.8 | -6.6 | -6.9 | -7   | -5.4 | -2.6 | -6.4 | -6.5 | -6.4 | -7.1 | -6.8 | -7.3 | -7.2 | -7.2 | -7.3 | 0.98 |      |
| ZINC9399096_1  | -8   | -3.9 | -3.4 | -2.4 | -7.3 | -7.1 | -4.2 | -3   | -7.8 | -3.3 | -7   | -4.7 | -6.7 | -4.1 | -7.2 | 0.2  | -6.3 | -6.6 | -7.2 | -6.8 | -5.5 | -5.6 | -7   | -6.2 | -8.5 | -7.3 | -8   | -7.6 | -8.4 | 2.11 |      |      |
| ZINC9404046    | -6.8 | -5.5 | -3.9 | -1.7 | -6.7 | -6.1 | -5.9 | -1.6 | -7.5 | -2.1 | -6.6 | -2.4 | -6.7 | -2.1 | -6.4 | -2.6 | -6   | -6.7 | -7.1 | -6.5 | -3.9 | -5.7 | -7   | -5.5 | -7.6 | -7.3 | -7.3 | -7.6 | -7.1 | -7.9 | 1.02 |      |
| ZINC95413927   | -7.5 | -5   | -4.8 | -4.8 | -6.9 | -6.8 | -4.7 | -5.4 | -7.3 | -4   | -6.7 | -4.6 | -4.8 | -5.2 | -5.1 | -4.8 | -6.7 | -6   | -6.5 | -6.6 | -2.7 | -5.7 | -6   | -5.5 | -6.7 | -6.9 | -7.2 | -7.2 | -7.2 | -7.5 | 1.20 |      |
| ZINC95414240   | -7.5 | -6   | -5.9 | -4.9 | -8   | -6   | -5.1 | -6.2 | -7.6 | -6.1 | -7.5 | -5.8 | -4.6 | -6.7 | -6.8 | -5.9 | -5.1 | -6.5 | -6.1 | -6.3 | -0.9 | -6.8 | -7.6 | -7.2 | -7   | -7.6 | -7.6 | -7.3 | -7.6 | -6.9 | 1.38 |      |
| ZINC95414271   | -7.7 | -6.6 | -5.1 | -4.3 | -7.5 | -6.9 | -6.3 | -4.7 | -7.7 | -5.4 | -7.4 | -4.3 | -6.9 | -5.8 | -7   | -5   | -6.1 | -6.3 | -7.5 | -7.2 | -3.4 | -6.6 | -7.3 | -6.9 | -7.7 | -7   | -7.1 | -7.4 | -7.2 | -7.5 | 1.18 |      |
| ZINC95414273   | -7.5 | -5.7 | -4.5 | -4.4 | -7   | -6.8 | -6.5 | -6.4 | -7.9 | -4.5 | -7.1 | -4   | -5.9 | -5.5 | -6.9 | -5.5 | -7.2 | -7.2 | -7.4 | -6.9 | -3.6 | -6.6 | -7.6 | -6.2 | -7.8 | -7.1 | -7.7 | -7.3 | -7.5 | -7.7 | 1.23 |      |
| ZINC95414376   | -7.6 | -4.5 | -5   | -4.6 | -6.8 | -6.7 | -6.6 | -5.2 | -7.7 | -5.2 | -6.9 | -5.3 | -6.5 | -6.3 | -7   | -4.3 | -6.7 | -6.6 | -7.3 | -6.9 | -3.5 | -6   | -7.5 | -5.9 | -7.9 | -6.9 | -7.7 | -7.3 | -7.4 | -7.8 | 1.18 |      |
| ZINC95416062   | -7.7 | -5.5 | -3.4 | -3.5 | -5.9 | -6.7 | -5.9 | -1.4 | -8.3 | -2.2 | -6.7 | -0.2 | -5.5 | -1.8 | -5.8 | -1   | -5.7 | -5.8 | -7.5 | -6.2 | -3   | -6.3 | -6.6 | -5.6 | -6.4 | -6.7 | -6.3 | -8.1 | -7.5 | -7.9 | 2.46 |      |
| ZINC95421772_1 | -7.5 | -4   | -3.3 | -1.4 | -7   | -6.7 | -5.9 | -2.9 | -7.9 | -2.6 | -6.4 | -3.6 | -5.6 | -4   | -7.3 | -2   | -5.2 | -5.9 | -7.3 | -6.3 | -3.2 | -6.2 | -6.3 | -6.6 | -6.4 | -7.1 | -6.1 | -7.2 | -7.3 | -7.1 | 1.85 |      |
| ZINC95423617_1 | -7.8 | -4.4 | -4.2 | -5   | -7   | -5.7 | -4.9 | -4.3 | -7.9 | -4.8 | -6.7 | -5   | -5.4 | -5.3 | -6.1 | -2.8 | -4.7 | -6.4 | -6.6 | -6.6 | -3.6 | -6.6 | -7.2 | -6.2 | -7.6 | -6.8 | -7.3 | -7   | -7.5 | -7   | 1.34 |      |
| ZINC95423618_1 | -7.4 | -4.4 | -3.9 | -4.3 | -6.8 | -6.4 | -4.8 | -3.9 | -7.7 | -4.5 | -6.7 | -4   | -5.5 | -4.9 | -6.2 | -2.9 | -6.1 | -6.6 | -6.7 | -6.5 | -2.6 | -7.1 | -6.9 | -5.9 | -7.9 | -6.8 | -7.7 | -7   | -7.2 | -7.8 | 1.51 |      |
| ZINC95426072   | -6.7 | -4   | -4.7 | -3.7 | -5.6 | -6   | -5   | -4.7 | -8   | -4.6 | -6   | -1.4 | -4.7 | -5.1 | -5.7 | -3.3 | -5   | -5.8 | -6.4 | -6.2 | -2.9 | -7.1 | -8.1 | -6.4 | -7.4 | -6.6 | -7.1 | -7.2 | -6.8 | -7.5 | 1.58 |      |
| ZINC95429207   | -7.7 | -5.3 | -4.7 | -5   | -7.1 | -6.6 | -5.8 | -5.1 | -7.5 | -5   | -6.3 | -4.7 | -6   | -5.7 | -6   | -4.9 | -5.7 | -6.3 | -6.5 | -6.6 | -5.3 | -6.6 | -7.3 | -6.2 | -7.4 | -7.3 | -7.3 | -7.9 | -7.6 | -8   | 1.03 |      |
| ZINC95429356_1 | -7.5 | -5.3 | -3.8 | -3.6 | -7   | -6.7 | -5.9 | -4.4 | -7.4 | -3.8 | -7   | -5.2 | -5.6 | -4.2 | -6   | -3.6 | -5.8 | -6.2 | -7.6 | -6.6 | -3.5 | -6.1 | -6.3 | -6.6 | -6.9 | -7   | -7.1 | -7.5 | -7.3 | -7.4 | 1.36 |      |
| ZINC95437845   | -7.4 | -1.4 | -1.3 | -0.9 | -7.3 | -7   | -6.2 | -1.1 | -8   | -1.8 | -6.2 | -4.4 | -6.4 | -2.8 | -6   | -1.4 | -6   | -6.6 | -5.8 | -5.9 | -4.5 | -6.3 | -7   | -6.2 | -7.4 | -7.3 | -7.1 | -7.1 | -7   | -7.2 | 2.30 |      |
| ZINC95449262   | -7.3 | -5   | -1   | -1.7 | -7.4 | -6.5 | -6.2 | -0.5 | -8.8 | -1.3 | -7.1 | 0.8  | -6.6 | 0.8  | -6.6 | -2.2 | -5.8 | -5.9 | -7.5 | -6.8 | -2.2 | -5.8 | -6.4 | -4.4 | -8.1 | -7.4 | -7.4 | -7.8 | -7.8 | -7.9 | 2.87 |      |
| ZINC95459392   | -7.4 | -5   | -2.3 | -3.4 | -7.2 | -6.9 | -5.4 | -0.3 | -7.3 | -3.1 | -6.6 | -1.2 | -6.8 | 1.1  | -6.4 | -2.7 | -5.4 | -6.3 | -7.3 | -6.3 | -2.9 | -4.2 | -6.6 | -4.8 | -7.7 | -7.6 | -7   | -7.8 | -7.7 | -8   | 2.46 |      |
| ZINC95459392_1 | -7.6 | -5.3 | -1.4 | -4   | -6.9 | -6.6 | -5.3 | -0.2 | -7.2 | -2.8 | -6.4 | 0.5  | -6.7 | -1.9 | -6.1 | -3   | -6.2 | -5.9 | -7.2 | -6   | -2.7 | -4.5 | -6.6 | -4   | -7.3 | -7.6 | -7.3 | -7.7 | -7.5 | -7.9 | 2.37 |      |
| ZINC95461326   | -5.6 | -4.6 | -4.8 | -3.6 | -5.9 | -5.8 | -5.2 | -6.2 | -6.9 | -5.2 | -5.6 | 0.9  | -4.7 | -5.9 | -5.3 | -4.5 | -5.3 | -5.2 | -5.8 | -5.3 | 0.8  | -6.4 | -6.6 | -5.7 | -6   | -6.5 | -7   | -6.8 | -6.9 | -7.6 | 1.88 |      |
| ZINC95467634   | -7.4 | -6.3 | -6   | -5.3 | -6.9 | -6.2 | -6.2 | -6.5 | -8.6 | -5.6 | -7.3 | -5.6 | -7.3 | -6.6 | -7.3 | -6.9 | -6.5 | -6.5 | -7.4 | -6.5 | -4.2 | -6.9 | -7   | -6.7 | -7.3 | -7.1 | -7.1 | -7.5 | -7.1 | -7.9 | 0.86 |      |
| ZINC95474723   | -7.9 | -5.2 | -5.2 | -5.7 | -6.7 | -6.3 | -5.5 | -5.2 | -7.6 | -3.7 | -6.7 | -4.5 | -5   | -5.4 | -6.6 | -2.7 | -5   | -6.4 | -6.5 | -6.6 | -5.5 | -5.9 | -7   | -6.4 | -7.9 | -7.4 | -7.3 | -7.9 | -7.1 | -8.3 | 1.30 |      |
| ZINC95477888   | -7.4 | -5.3 | -5   | -4.7 | -7   | -6.8 | -5.4 | -5.2 | -7.7 | -5.3 | -7.9 | -5.3 | -6.9 | -6.2 | -6.7 | -4.9 | -5.9 | -7.2 | -7.2 | -6.6 | -4.2 | -6.7 | -6.9 | -6.2 | -7.7 | -7.1 | -7.4 | -7.5 | -7.3 | -7.5 | 1.05 |      |
| ZINC95479120   | -7.8 | -4.2 | -2.7 | -3.6 | -7.3 | -6.9 | -6.1 | -1.6 | -8   | -4.2 | -7.1 | -4.8 | -5.9 | -3.2 | -6.8 | -0.8 | -5.6 | -6.5 | -6.7 | -6.6 | -4.8 | -5.4 | -6.9 | -6   | -8.1 | -7.1 | -7.9 | -7.9 | -7.5 | -8.4 | 1.99 |      |
| ZINC95479373   | -7.8 | -4.2 | -2.7 | -1.9 | -6.4 | -6.9 | -6.1 | -1.3 | -8.3 | -2.9 | -6.9 | -3.8 | -6.4 | -5   | -6.1 | -0.2 | -6   | -6.9 | -6.9 | -6.9 | -4.2 | -5.2 | -7.1 | -6   | -8.4 | -7.2 | -8.1 | -7.6 | -7.7 | -8.1 | 2.20 |      |
| ZINC95500817_1 | -7.3 | -4.2 | -3.4 | -1.2 | -6.7 | -6.6 | -4.8 | -3.9 | -6.8 | -3.2 | -5.9 | -4.6 | -4.9 | -3.6 | -5.4 | 0.9  | -3.7 | -5.5 | -6   | -6.9 | -5.1 | -5.8 | -6.7 | -5.5 | -7.2 | -6.8 | -6.1 | -7.3 | -7.1 | -6.7 | 2.61 |      |
| ZINC95500817_2 | -7.5 | -3.8 | -2.6 | -2.4 | -6.8 | -7   | -4.1 | -4   | -7.4 | -1.9 | -6.6 | 2.2  | -4.8 | -3.5 | -5.4 | -0.4 | -6.5 | -5.5 | -6.4 | -5.9 | -5.2 | -6   | -6.7 | -5.6 | -6.6 | -6.5 | -6.7 | -7.3 | -7   | -7.2 | 2.57 |      |
| ZINC95500817_4 | -7.6 | -3.4 | -2.9 | -2.6 | -6.1 | -5.4 | -4.5 | -3.6 | -7.3 | -1.6 | -5.9 | 1    | -5.6 | -3.6 | -5.2 | -1.9 | -6.5 | -5.5 | -6.2 | -6.7 | -3.5 | -5.8 | -6.4 | -5.3 | -6.6 | -6.8 | -6.8 | -7.3 | -7   | -7.3 | 2.06 |      |
| ZINC95507478   | -7.9 | -6.5 | -3   | -2.8 | -7.1 | -7.1 | -7   | -2.7 | -8.3 | -2.9 | -6.8 | -4   | -7.1 | -1.8 | -7   | -3.3 | -6.2 | -6.7 | -8   | -7.1 | -3.5 | -6.5 | -6.9 | -5.3 | -8.2 | -7.5 | -7.4 | -8   | -7.8 | -8.1 | 2.02 |      |
| ZINC95519869   | -7.8 | -5   | -4.3 | -4.3 | -6.9 | -6.6 | -4.5 | -4.7 | -7.1 | -5   | -6.2 | 1.4  | -5.9 | -5.5 | -5.6 | -2.1 | -5.1 | -6.3 | -7.1 | -6.8 | -3.1 | -6.4 | -7.1 | -6.6 | -6.2 | -7.3 | -7.2 | -7.7 | -7.6 | -7.5 | 1.94 |      |
| ZINC95942027   | -7.6 | -3.8 | -1.1 | -1.7 | -7.2 | -6.1 | -6.8 | -1.9 | -8.4 | -1.9 | -5.8 | -3.9 | -5.9 | -1.1 | -5.8 | 3.3  | -5.1 | -5.7 | -6.7 | -6.6 | -4.3 | -6.7 | -7.4 | -5.8 | -7.2 | -7   | -7.1 | -7.1 | -6.8 | -7.3 | 2.64 |      |
| ZINC95945498_2 | -7.9 | -5.2 | -3.7 | -3.1 | -7.5 | -7   | -6.1 | -2.8 | -8   | -3.5 | -7.7 | -3.4 | -7   | -4   | -7.7 | -3.4 | -6.3 | -6.8 | -7.3 | -6.9 | -2.7 | -6.3 | -6.4 | -6   | -7.4 | -7.3 | -7.7 | -7.8 | -8   | -8.2 | 1.84 |      |
| ZINC95953925   | -7.6 | -4.8 | -5   | -3.5 | -7.1 | -6.7 | -5.1 | -4.7 | -7.6 | -4.8 | -7.1 | -4.5 | -4.9 | -6   | -6.1 | -2.7 | -5.9 | -6.7 | -7.8 | -7.5 | -3.2 | -6.9 | -7.1 | -6.4 | -7.2 | -7   | -7.2 | -7.5 | -7.3 | -7.6 | 1.45 |      |
| ZINC95958660   | -7.5 | -3.9 | -3.7 | -1.9 | -6.9 | -6.5 | -5.5 | -3.4 | -7.3 | -3.5 | -6.7 | -1.6 | -5.2 | -5.2 | -6   | -1.5 | -6.3 | -6.2 | -6.1 | -6.9 | -2.2 | -6.6 | -7.1 | -6.5 | -6.9 | -7.3 | -7.4 | -7.2 | -7.4 | -7.2 | 1.93 |      |
| ZINC95965934   | -6.7 | -4.9 | -5.2 | -4.2 | -6.6 | -6.6 | -6   | -5.7 | -7.3 | -5.5 | -6.9 | -4.7 | -6.3 | -5.7 | -7   | -4.1 | -6.2 | -6.4 | -7.3 | -6.6 | -3.4 | -5.2 | -7.1 | -6.7 | -6.9 | -6.9 | -7.6 | -7.2 | -7   | -7   | 1.08 |      |
| ZINC95981750_1 | -7.5 | -5.3 | -3.9 | -3.8 | -7   | -6.4 | -6.1 | -2.8 | -8.3 | -3.4 | -7.2 | -3.6 | -7   | -4.7 | -5.9 | -1.4 | -6.3 | -5.6 | -6.8 | -6.4 | -5.2 | -6.8 | -7.3 | -6.9 | -7.1 | -6.8 | -7.1 | -7.5 | -7.2 | -7.6 | 1.57 |      |
| ZINC95987062   | -7.7 | -4.7 | -3.1 | -2.2 | -6.5 | -5.9 | -5.9 | -0.6 | -7.4 | 0.1  | -7.1 | -0.7 | -6   | 1.1  | -5.9 | -0.3 | -4.7 | -6.1 | -7   | -5.8 | -2.8 | -5.4 | -6.6 | -4.6 | -7.5 | -7.2 | -7.4 | -7.6 | -7.3 | -7.8 | 2.68 |      |
| ZINC95992889_1 | -7.4 | -4.7 | -4.2 | -2.4 | -6.1 | -6.3 | -6.6 | -3.7 | -8.1 | -2.8 | -7.1 | -4.7 | -6.1 | -2.8 | -7   | -2.8 | -6.3 | -6.9 | -7.2 | -6.9 | -5.4 | -6   | -6.6 | -5.4 | -6.7 | -6.8 | -6.3 | -7.6 | -7.1 | -7.6 | 1.62 |      |
| ZINC96000752   | -7.9 | -5.2 | -4.5 | -3   | -6.7 | -6.7 | -5.8 | -3.7 | -    |      |      |      |      |      |      |      |      |      |      |      |      |      |      |      |      |      |      |      |      |      |      |      |

|                |      |      |      |      |      |      |      |      |      |      |      |      |      |      |      |      |      |      |      |      |      |      |      |      |      |      |      |      |      |      |      |
|----------------|------|------|------|------|------|------|------|------|------|------|------|------|------|------|------|------|------|------|------|------|------|------|------|------|------|------|------|------|------|------|------|
| ZINC97327663   | -7.5 | -4.8 | -3.4 | -2.6 | -7.4 | -7   | -6.1 | -3.6 | -8.2 | -3.1 | -6.8 | -0.8 | -6.9 | -4.5 | -6   | -2.3 | -6.6 | -6.1 | -6.7 | -7   | -5.4 | -7.1 | -7.4 | -6.9 | -7.5 | -7.3 | -7.2 | -7.3 | -7.4 | -7.1 | 1.90 |
| ZINC97378818   | -7.7 | -5.4 | -4.8 | -5.6 | -6.9 | -6.4 | -6   | -4   | -8.5 | -3.6 | -6.8 | -4.4 | -6.4 | -4.5 | -7.1 | -5.4 | -5   | -5.9 | -6.6 | -6.3 | -3.8 | -6.2 | -6.8 | -5.7 | -7.4 | -7.6 | -7.2 | -7.8 | -7.7 | -8   | 1.33 |
| ZINC97393745   | -7.8 | -6   | -5.9 | -5.6 | -6.6 | -5.7 | -6.2 | -6.1 | -7.3 | -5.1 | -6.3 | -5   | -5.2 | -6.7 | -5.7 | -5.2 | -6.1 | -5.9 | -5.4 | -6.9 | -5   | -7.2 | -6   | -5.7 | -6.2 | -6.3 | -6.5 | -7.4 | -7.7 | -7.9 | 0.84 |
| ZINC97402491   | -7.8 | -5.7 | -5.2 | -4.5 | -7.5 | -7.5 | -6.5 | -4.8 | -7.8 | -5.1 | -7.4 | -4.6 | -6   | -5.9 | -6.5 | -4.5 | -6.1 | -6.5 | -7.7 | -7.1 | -4.2 | -7   | -6.7 | -6.5 | -7.3 | -7.5 | -7.5 | -7.9 | -7.6 | -7.8 | 1.18 |
| ZINC97464432_1 | -7.8 | -3.6 | -2.5 | -0.7 | -7.1 | -6.5 | -5.3 | -0.9 | -8.4 | -1.6 | -7   | -2.9 | -6.2 | -1.2 | -6.2 | -1.8 | -5.2 | -7.1 | -7   | -6.8 | -4.5 | -5.4 | -7.2 | -5.4 | -7.5 | -7   | -7.5 | -7.6 | -7.4 | -7.9 | 2.39 |
| ZINC97465105   | -7.7 | -5.4 | -6   | -5.4 | -6   | -5.4 | -5.1 | -5.4 | -6.2 | -4.6 | -6.2 | -4.6 | -5.2 | -7.1 | -5.9 | -5.5 | -5.6 | -5.8 | -5.8 | -5.4 | -4.7 | -5.9 | -6.3 | -5.8 | -6.3 | -6.4 | -6   | -6.6 | -6.6 | -6.5 | 0.70 |
| ZINC97490955_4 | -7.7 | -5.5 | -3.3 | -4.5 | -6.8 | -6.9 | -7   | -0.5 | -8.4 | 1.2  | -7.1 | -3   | -5.9 | -1.2 | -7.4 | 3.1  | -5.8 | -6.4 | -7   | -6.2 | -4.7 | -5.3 | -6.6 | -5.9 | -7.4 | -7.2 | -7.4 | -7.3 | -7.4 | -7.3 | 2.79 |
| ZINC97493870_1 | -7.6 | -6.3 | -4.3 | -4.2 | -7.3 | -7.4 | -6.9 | -3   | -8.6 | -3.6 | -7.5 | -0.9 | -7   | -0.8 | -6.7 | -2.8 | -6.3 | -7.2 | -7.9 | -7.3 | -3.9 | -6.2 | -6.3 | -5.6 | -8.1 | -7.5 | -7.6 | -7.8 | -6.8 | -7.6 | 2.11 |
| ZINC97493870_5 | -7.3 | -5.2 | -4.1 | -5   | -7.6 | -7.5 | -6.7 | -2.9 | -8.1 | -4.2 | -7.7 | -0.8 | -6.7 | -1.1 | -7.1 | -3.2 | -6.3 | -7.4 | -7.9 | -7.3 | -3.8 | -5.2 | -6.3 | -5.6 | -8.1 | -7.6 | -7.5 | -7.9 | -7.5 | -7.6 | 2.06 |
| ZINC97635156   | -7.5 | -6.2 | -5.6 | -5.4 | -7.3 | -6.8 | -5.4 | -6.3 | -6.8 | -5.4 | -6.8 | -6   | -5.7 | -5.9 | -6.5 | -5.6 | -6.4 | -6.5 | -7   | -6.1 | -2.6 | -6.5 | -6.9 | -6.4 | -7.3 | -6.9 | -7.4 | -7.3 | -7.2 | -7.7 | 0.98 |
| ZINC97700062   | -7.4 | -4.9 | -4   | -0.3 | -7.7 | -7.4 | -6.3 | -3.1 | -8.1 | -3.5 | -7.6 | -2.1 | -6.9 | -4.2 | -8.8 | -2.5 | -5.9 | -6.3 | -7.3 | -7.1 | -2.9 | -6   | -7.3 | -6.3 | -7.1 | -7.5 | -7.1 | -7.5 | -7.7 | -7.7 | 2.08 |
| ZINC97814964   | -8.3 | -4.6 | -4   | -3.6 | -7.3 | -6.6 | -6.4 | -3.6 | -8.4 | -4   | -7   | -2.7 | -5.9 | -4.9 | -6.6 | -1.5 | -5.8 | -6.3 | -7.1 | -6.4 | -5   | -6.6 | -6.8 | -6.8 | -7.4 | -7.8 | -8.1 | -7.7 | -8.4 | -8.3 | 1.82 |
| ZINC98114689   | -7.4 | -4.5 | -3.9 | -1.8 | -6   | -5.8 | -5.7 | -2.6 | -7   | -1.4 | -5.9 | -2.6 | -6.3 | -3.8 | -6.1 | 0.5  | -5.2 | -6.1 | -6.1 | -6.2 | -4   | -5.9 | -7.4 | -5.3 | -6.9 | -6.9 | -7.1 | -7.5 | -7.3 | -7.6 | 2.05 |
| ZINC98114752   | -7.5 | -4.3 | -1.3 | -1.5 | -6   | -5.7 | -5.4 | -2.6 | -7.1 | -2.2 | -6.2 | -2.6 | -5.3 | -1.6 | -6   | -1.6 | -5.5 | -5.4 | -6.3 | -5.9 | -3.2 | -5.7 | -7.1 | -5.3 | -6.9 | -7.2 | -6   | -7.4 | -7.2 | -7.2 | 2.03 |
| ZINC98115265   | -6.9 | -4.9 | -4   | -3.4 | -6.8 | -7   | -5.7 | -4.8 | -8.1 | -3.2 | -6.9 | -1.5 | -6.9 | -4.8 | -6.5 | -4   | -6.8 | -5.6 | -6.6 | -6.2 | -3.6 | -6.7 | -7.1 | -6.7 | -7.2 | -7.1 | -7.3 | -7.8 | -7.5 | -7.7 | 1.64 |
| ZINC98150430_3 | -7.4 | -6.5 | -3.8 | -5.1 | -7.5 | -7.4 | -7.2 | -3.4 | -8.9 | -3.1 | -8.1 | -1   | -8   | -3   | -8   | -3.2 | -7.2 | -7.4 | -7.4 | -6.8 | -3.9 | -6   | -7.1 | -5.2 | -8   | -7.9 | -8.4 | -8.3 | -8.5 | -8.5 | 2.12 |
| ZINC98150430_5 | -8.7 | -6.1 | -3   | -4.6 | -7.4 | -7.4 | -6.1 | -2.2 | -8.8 | -3.4 | -8   | 0.9  | -7.7 | -2.2 | -7.4 | -2.5 | -7   | -6.5 | -7.5 | -6.3 | -4.5 | -6.6 | -7.2 | -5.9 | -8.5 | -8.4 | -8.4 | -8.7 | -8.5 | -8.8 | 2.49 |
| ZINC98150430_7 | -8.7 | -6.3 | -3.8 | -4.4 | -7.2 | -6.4 | -7.1 | -3.4 | -8.5 | -0.5 | -8.2 | -6.2 | -7.4 | -1.7 | -7.3 | -2.8 | -7   | -6.9 | -7.9 | -6.3 | -5.8 | -6.3 | -7.2 | -6.8 | -8.5 | -7.9 | -8.4 | -8.7 | -8.6 | -8.9 | 2.17 |
| ZINC98150436_1 | -7.9 | -6   | -3   | -1.9 | -6.8 | -7.2 | -7   | -2.4 | -8.1 | -3.8 | -7.2 | -3.7 | -7.6 | -2.2 | -7.4 | -2.4 | -6.4 | -5.6 | -7.1 | -7   | -3.3 | -6.2 | -6.6 | -5.7 | -7.7 | -6.9 | -7.6 | -8   | -7.7 | -8   | 2.04 |
| ZINC98150436_5 | -7.9 | -6.2 | -2.9 | -3.4 | -7.6 | -7.3 | -6.3 | -1.9 | -8.3 | -5.1 | -7.8 | -4.3 | -7.3 | -1.3 | -7.7 | -2.1 | -6.6 | -6.9 | -7.3 | -7   | -4.3 | -6.3 | -6.7 | -5.3 | -7.9 | -7.4 | -7.7 | -8   | -7.9 | -8.2 | 2.06 |
| ZINC98150436_7 | -8   | -6.2 | -3.9 | -4.9 | -7.6 | -7   | -6.6 | -2.3 | -8.1 | -4   | -7.7 | -4.2 | -7.3 | -1.9 | -7.5 | -3.5 | -6.6 | -6.6 | -7.2 | -6.9 | -5.9 | -6.4 | -6.7 | -4.8 | -7.8 | -7.3 | -7.8 | -7.9 | -8   | -8.2 | 1.78 |
| ZINC98150470   | -8   | -6.2 | -4   | -4.5 | -7.2 | -7.1 | -6.5 | -1.8 | -8.1 | -1.2 | -7.2 | -3.3 | -6.6 | 1.9  | -6.7 | -2.3 | -6   | -6.3 | -7   | -6.6 | -3.9 | -6.5 | -6.3 | -4.8 | -7.7 | -7.7 | -8.2 | -8.2 | -8.2 | -8.2 | 2.46 |
| ZINC98161534   | -7.7 | -5.9 | -5.7 | -2.2 | -7.3 | -6.5 | -6.4 | -3.3 | -8.1 | -2.9 | -7.3 | -1.3 | -6.3 | -2.9 | -6.3 | -3.3 | -7.3 | -6.2 | -6.7 | -6.1 | -5.4 | -7.2 | -6.7 | -6   | -7.2 | -7.3 | -7.5 | -8   | -7.5 | -7.9 | 1.87 |
| ZINC98161549   | -7.8 | -3.2 | -2.7 | -2.9 | -7.4 | -7.2 | -6.4 | 0.5  | -8.3 | -0.3 | -8.1 | 0.8  | -6.7 | 0.7  | -6.7 | -0.9 | -5.3 | -6.7 | -7.3 | -6.9 | -4.1 | -6.9 | -7   | -5.5 | -7.1 | -7.3 | -7.4 | -7.3 | -7.4 | -7.9 | 2.92 |
